# Supplementary material for: An approach for prioritizing candidate genes from RNA-seq using preclinical cocaine self-administration datasets as a test case
Source: Research Square preprint supplement (doi:10.21203/rs.3.rs-1551886/v2), 2023-02-07
Supplement: Supplementary file 1 [file 491107c8310d440add7b39e5.docx]

**Supplementary materials**

**Gene abbreviations**

Gene abbreviations are listed for human orthologs.

*Human homologs of discussed Candidate genes*

AGK Acylglycerol Kinase

AMZ1 Archaelysin Family Metallopeptidase 1

ARMCX4 Armadillo Repeat Containing X-Linked 4

B2M Beta-2-Microglobulin

BCAS1 Brain Enriched Myelin Associated Protein 1

BST2 Bone Marrow Stromal Cell Antigen 2

BTG1 B-Cell Translocation Gene (BTG) Anti-Proliferation Factor 1

CABYR Calcium Binding Tyrosine Phosphorylation Regulated

CACYBP Calcyclin Binding Protein

CARTPT Cocaine- And Amphetamine Regulated Transcript (CART) Prepropeptide

CCDC88C Coiled-Coil Domain Containing 88C

CELF6 CUGBP Elav-like Family Member 6

CFAP74 Cilia And Flagella Associated Protein 74

DHX33 DEAH-Box Helicase 33

DRD3 Dopamine Receptor D3

EGR2 Early Growth Response 2

FABP7 Fatty Acid Binding Protein 7

FKBP4 FKBP Prolyl Isomerase 4

FTH1 Ferritin Heavy Chain 1

GABRG2 Gamma-Aminobutyric Acid (GABA) Type A Receptor Subunit Gamma 2

GAD2 Glutamate Decarboxylase 2

GADD45G Growth Arrest And DNA Damage Inducible Gamma

GPD1 Glycerol-3-Phosphate Dehydrogenase 1

GNA12 G Protein Subunit Alpha 12

GPR101 G Protein-Coupled Receptor 101

GPRIN3 G Protein-Regulated Inducer of Neurite Outgrowth (GPRIN) 3

GSTK1 Glutathione S-Transferase Kappa 1

GUCY1A3 Guanylate Cyclase 1 Soluble Subunit Alpha 1

HAPLN2 Hyaluronan And Proteoglycan Link Protein 2

HSPA5 Heat Shock Protein Family A (Hsp70) Member 5

IRS2 Insulin Receptor Substrate 2

KCTD17 Potassium Channel Tetramerization Domain Containing 17

KIF5A Kinesin Family Member 5A

KLHDC2 Kelch Domain Containing 2

LHFPL4 LHFPL Tetraspan Subfamily Member 4

LIN7B Lin-7 Homolog B, Crumbs Cell Polarity Complex Component

LYPD1 LY6/PLAUR Domain Containing 1

MBP Myelin Basic Protein

MIA3 MIA SH3 Domain ER Export Factor 3

MOBP Myelin Associated Oligodendrocyte Basic Protein

MOG Myelin Oligodendrocyte Glycoprotein

MUC3A Mucin 3A, Cell Surface Associated

NTS Neurotensin

OPALIN Oligodendrocytic Myelin Paranodal And Inner Loop Protein

PHLDA1 Pleckstrin Homology Like Domain Family A Member 1

PITPNM3 Phosphatidylinositol Transfer Protein, Membrane Associated (PITPNM) Family Member 3

PPFIA4 Protein Tyrosine Phosphatase, Receptor Type, F Polypeptide (PTPRF), Interacting Protein (Liprin), Alpha 4

PPP1R15A Protein Phosphatase 1 Regulatory Subunit 15A

PRKCG Protein Kinase C Gamma

RYR3 Ryanodine Receptor 3

RGS5 Regulator Of G Protein Signaling 5

RPS6KA2 Ribosomal Protein S6 Kinase A2

SNAP91 Synaptosome Associated Protein 91

SOD3 Superoxide Dismutase 3

SOX17 Sex Determining Region Y (SRY)-Box Transcription Factor 17

SPINT3 Serine Peptidase Inhibitor, Kunitz Type 3

SYNPR Synaptoporin

TIPARP TCDD Inducible Poly(ADP-Ribose) Polymerase

TTLL1 Tubulin Tyrosine Ligase (TTL) Family Tubulin Polyglutamylase Complex Subunit L1

USP46 Ubiquitin Specific Peptidase 46

VIM Vimentin

XAF1 XIAP Associated Factor 1

ZDBF2 Zinc Finder DBF-Type Containing 2

*Other genes*

BDNF Brain Derived Neurotrophic Factor

C1QL2 Complement C1q Like 2

CART Cocaine- and Amphetamine-Related Transcript

CREB1 cAMP Responsive Element Binding Protein 1

FAM53B Family With Sequence Similarity 53 Member B

**Tissue abbreviations**

From Gene-Tissue Expression (GTEx) V8 database. Tissues with the prefix “BRN” (brain) are located in the central nervous system (CNS).

ADP-SBC Adipose – subcutaneous STOMACH Stomach

ADP-VSO Adipose - visceral omentum TESTIS Testis

ADRNLGL Adrenal gland THYROID Thyroid

ART-CRN Artery – coronary UTERUS Uterus

ART-TB Artery – tibial VAGINA Vagina

BLADDER Bladder WHLBLD Whole blood

BRN-AMY Amygdala

BRN-ACC Anterior cingulate cortex (BA24)

BRN-CAU Caudate, basal ganglia

BRN-CB-a Cerebellar hemisphere

BRN-CB-b Cerebellum

BRN-CTX-a Frontal cortex (BA9)

BRN-CTX-b Cortex

BRN-HIPP Hippocampus

BRN-HYP Hypothalamus

BRN-NAC Nucleus accumbens, basal ganglia

BRN-PTRY Pituitary gland

BRN-PUT Putamen, basal ganglia

BRN-SN Substantia nigra

BRN-SPC Spinal cord (cervical C1)

BREAST Breast

CELL-FB Cells - cultured fibroblasts

CELL-LYM Cells - EBV-transformed lymphocytes

CVX-ECT Cervix - ectocervix

CVX-END Cervix - endocervix

CLN-SIG Colon - sigmoid

CLN-TRN Colon - transverse

ESP-GEJ Esophagus - gastroesophageal junction

ESP-MCS Esophagus mucosa

ESP-MSL Esophagus mucularis

FLPTB Fallopian tube

HRT-AA Heart - atrial appendage

HRT-LV Heart - left ventricle

KDY-CTX Kidney - cortex

KDY-MDL Kidney - medulla

LIVER Liver

LUNG Lung

SALGL Salivary gland

MSC-SK Skeletal muscle

NRV-TB Nerve - tibial

OVARY Ovary

PANCREAS Pancreas

PROSTATE Prostate

SKN-NSP Skin - not sun exposed, subrapubic

SKN-SLL Skin - sun exposed, lower leg

SIN-TIL Small intestine - terminal ileum

SPLEEN Spleen

**Supplementary figures and legends**

**
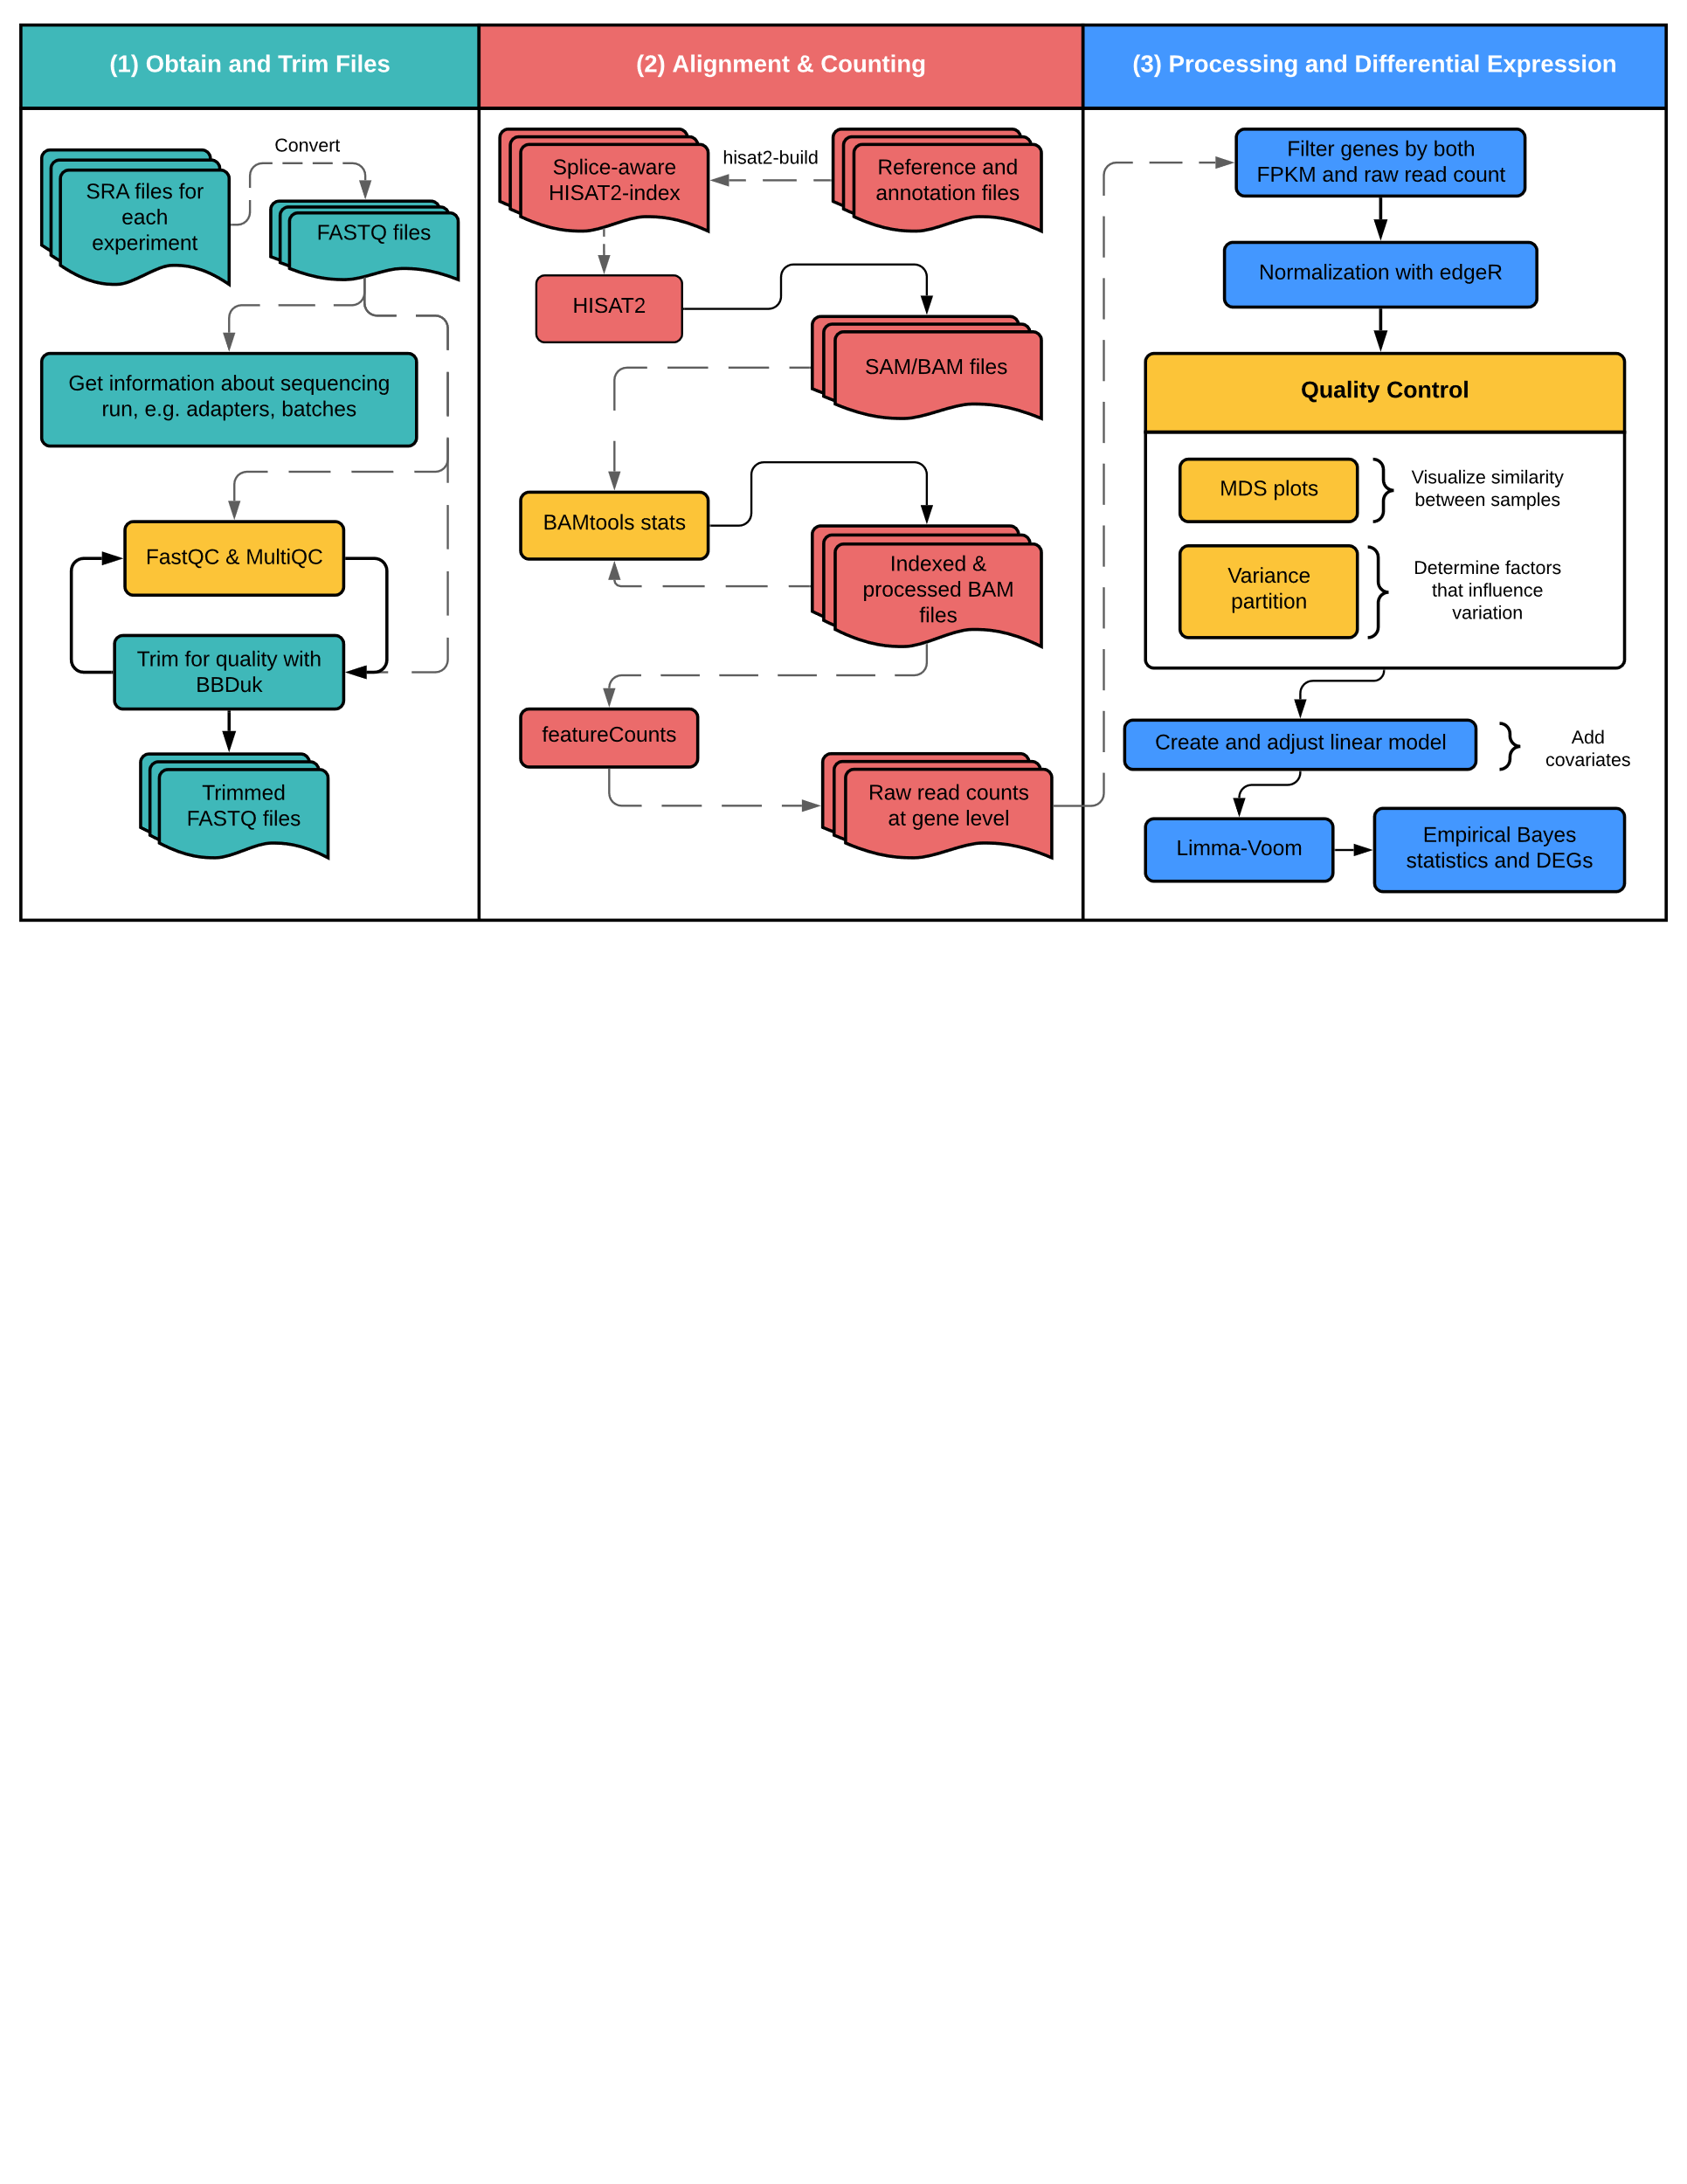
**

**Supplementary Figure S1. RNA-seq pipeline for differential expression analysis.** All 3 datasets were analyzed separately using the above pipeline.

**
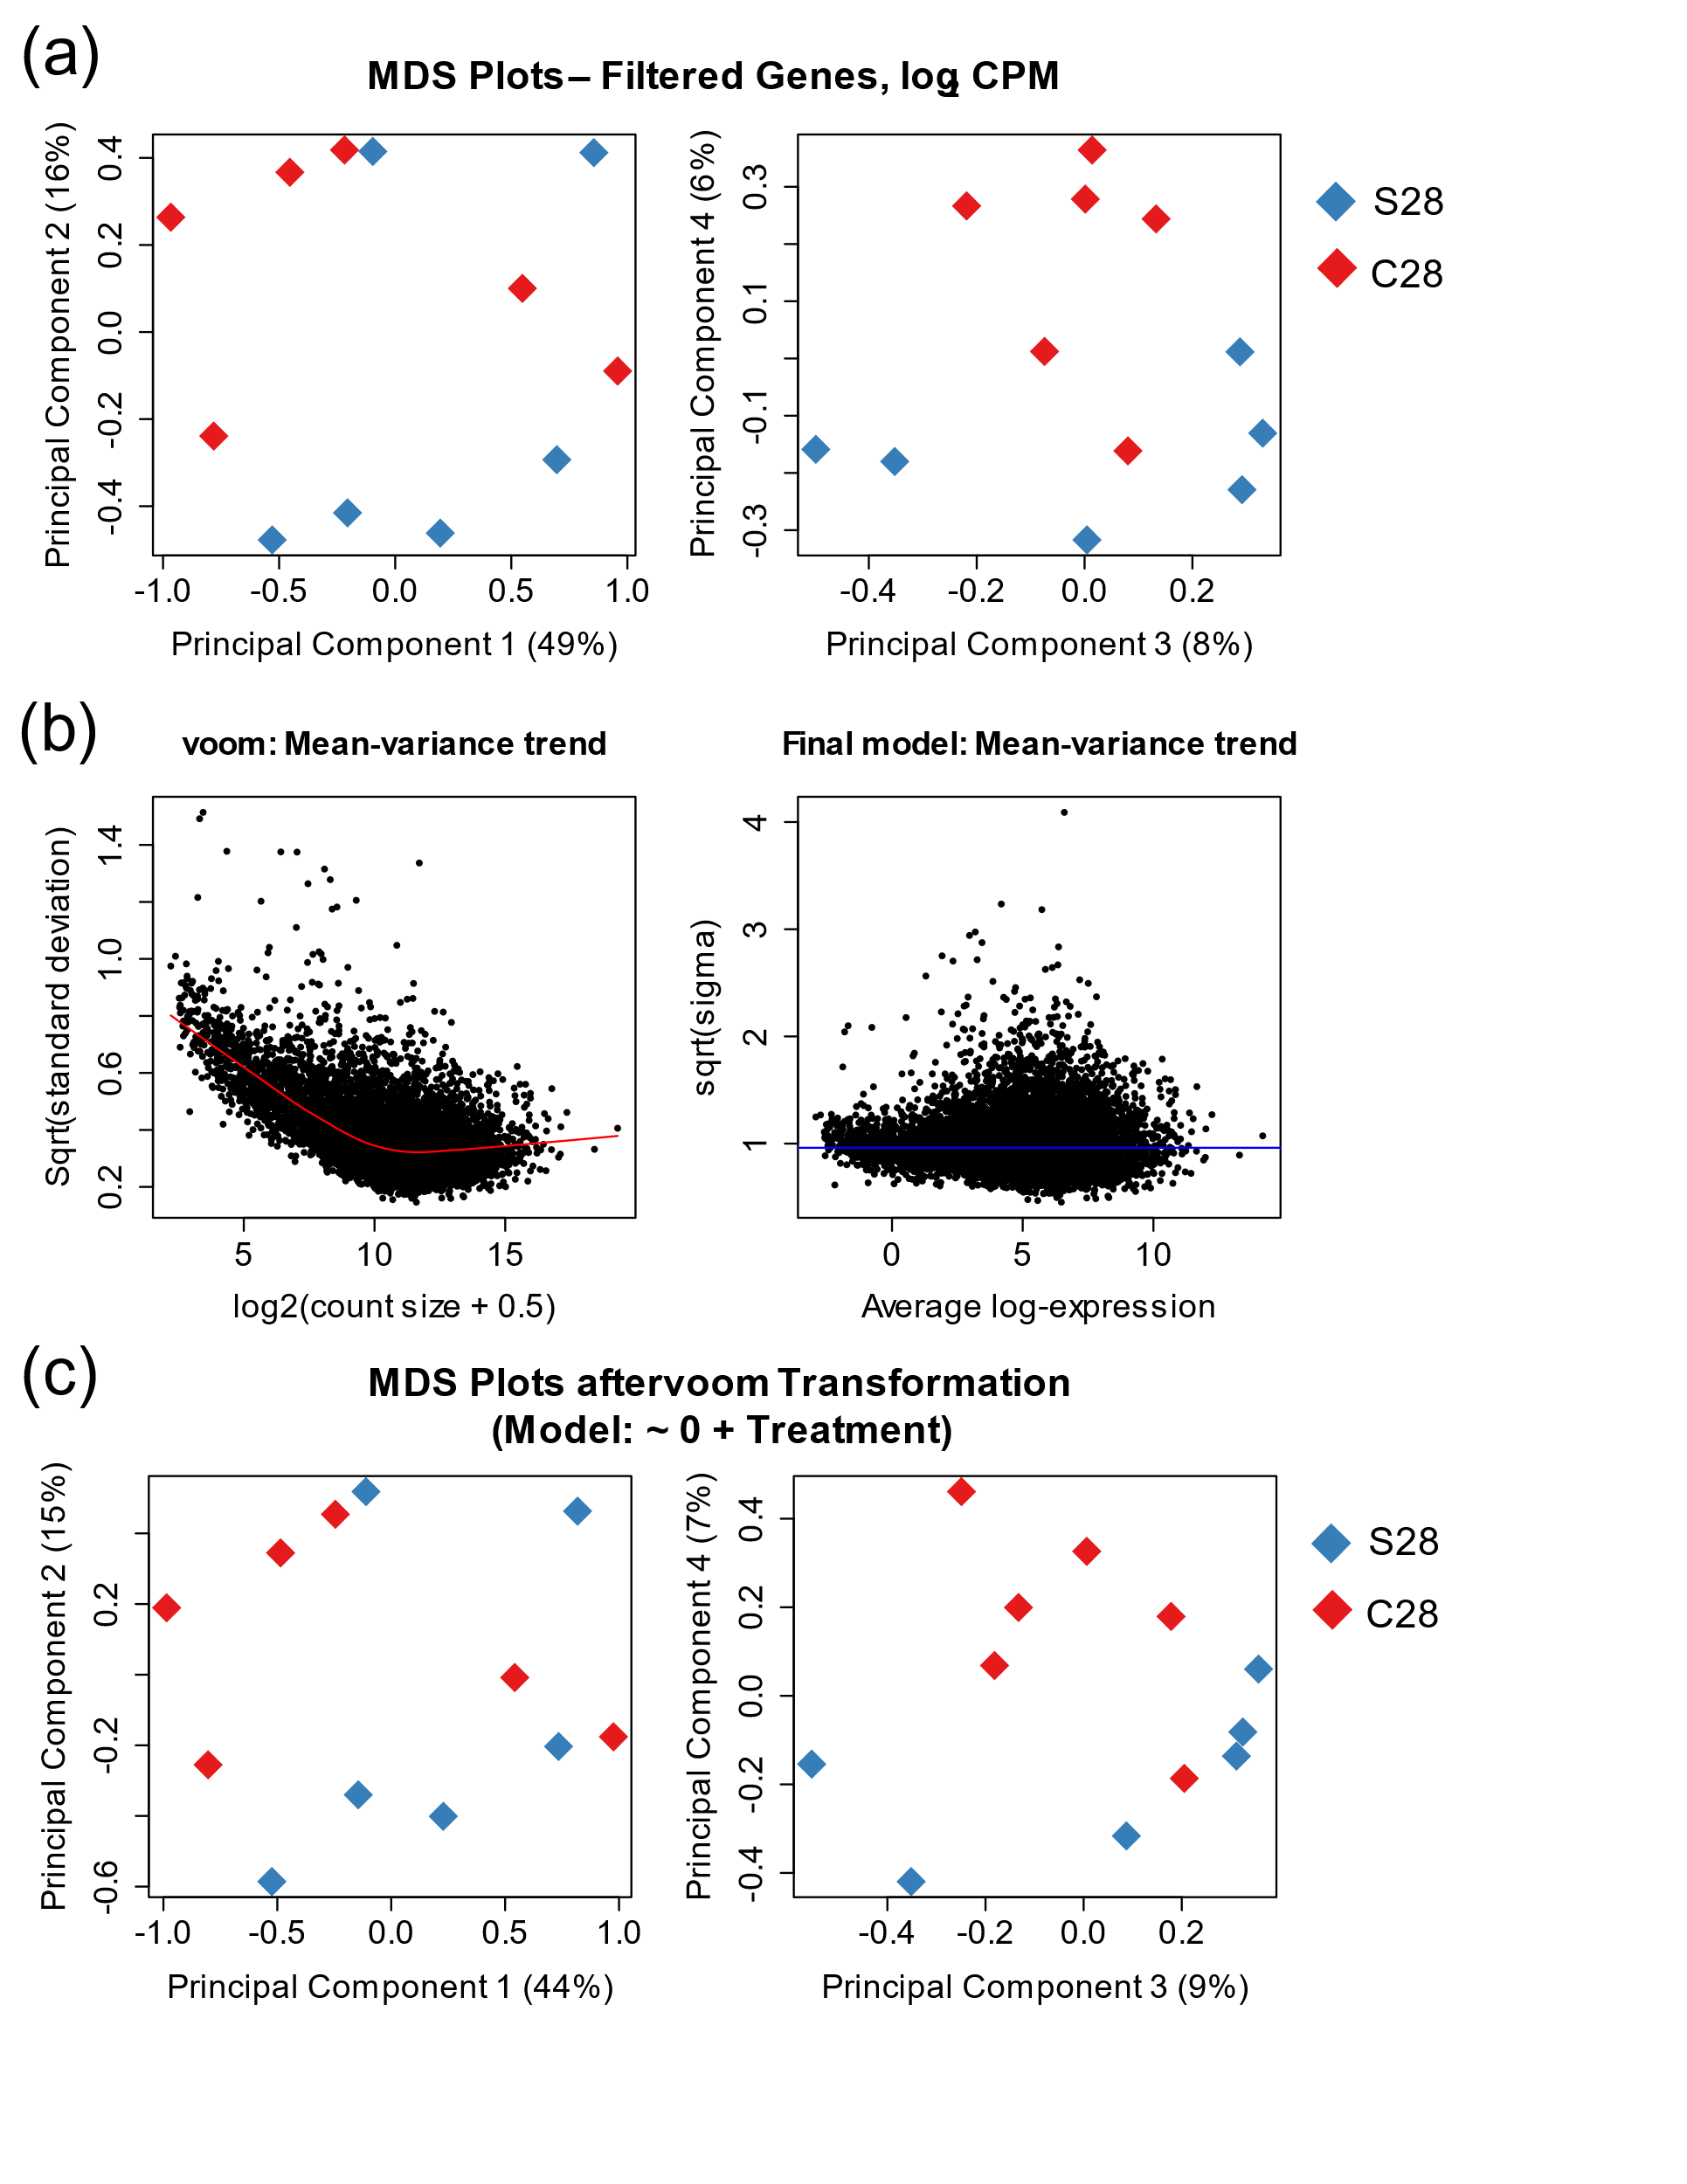
**

**Supplementary Figure S2. RNA-seq processing for Carpenter S28 vs. C28 dataset.** (**a**, **c**) Multidimensional scaling (MDS) plots for the top 100 genes with the largest fold change differences between groups before (**a**) and after (**c**) voom transformation. Principal components 1 and 2 (left) and 3 and 4 (right) are shown, along with the percentage of variation captured by each component. Blue and red signify the S28 and C28 groups, respectively. (**b**) limma voom was used to apply a linear model to the data. Gene expression was measured in CPM with (**a**, **c**) and without (**b**) log2 transformation.

**
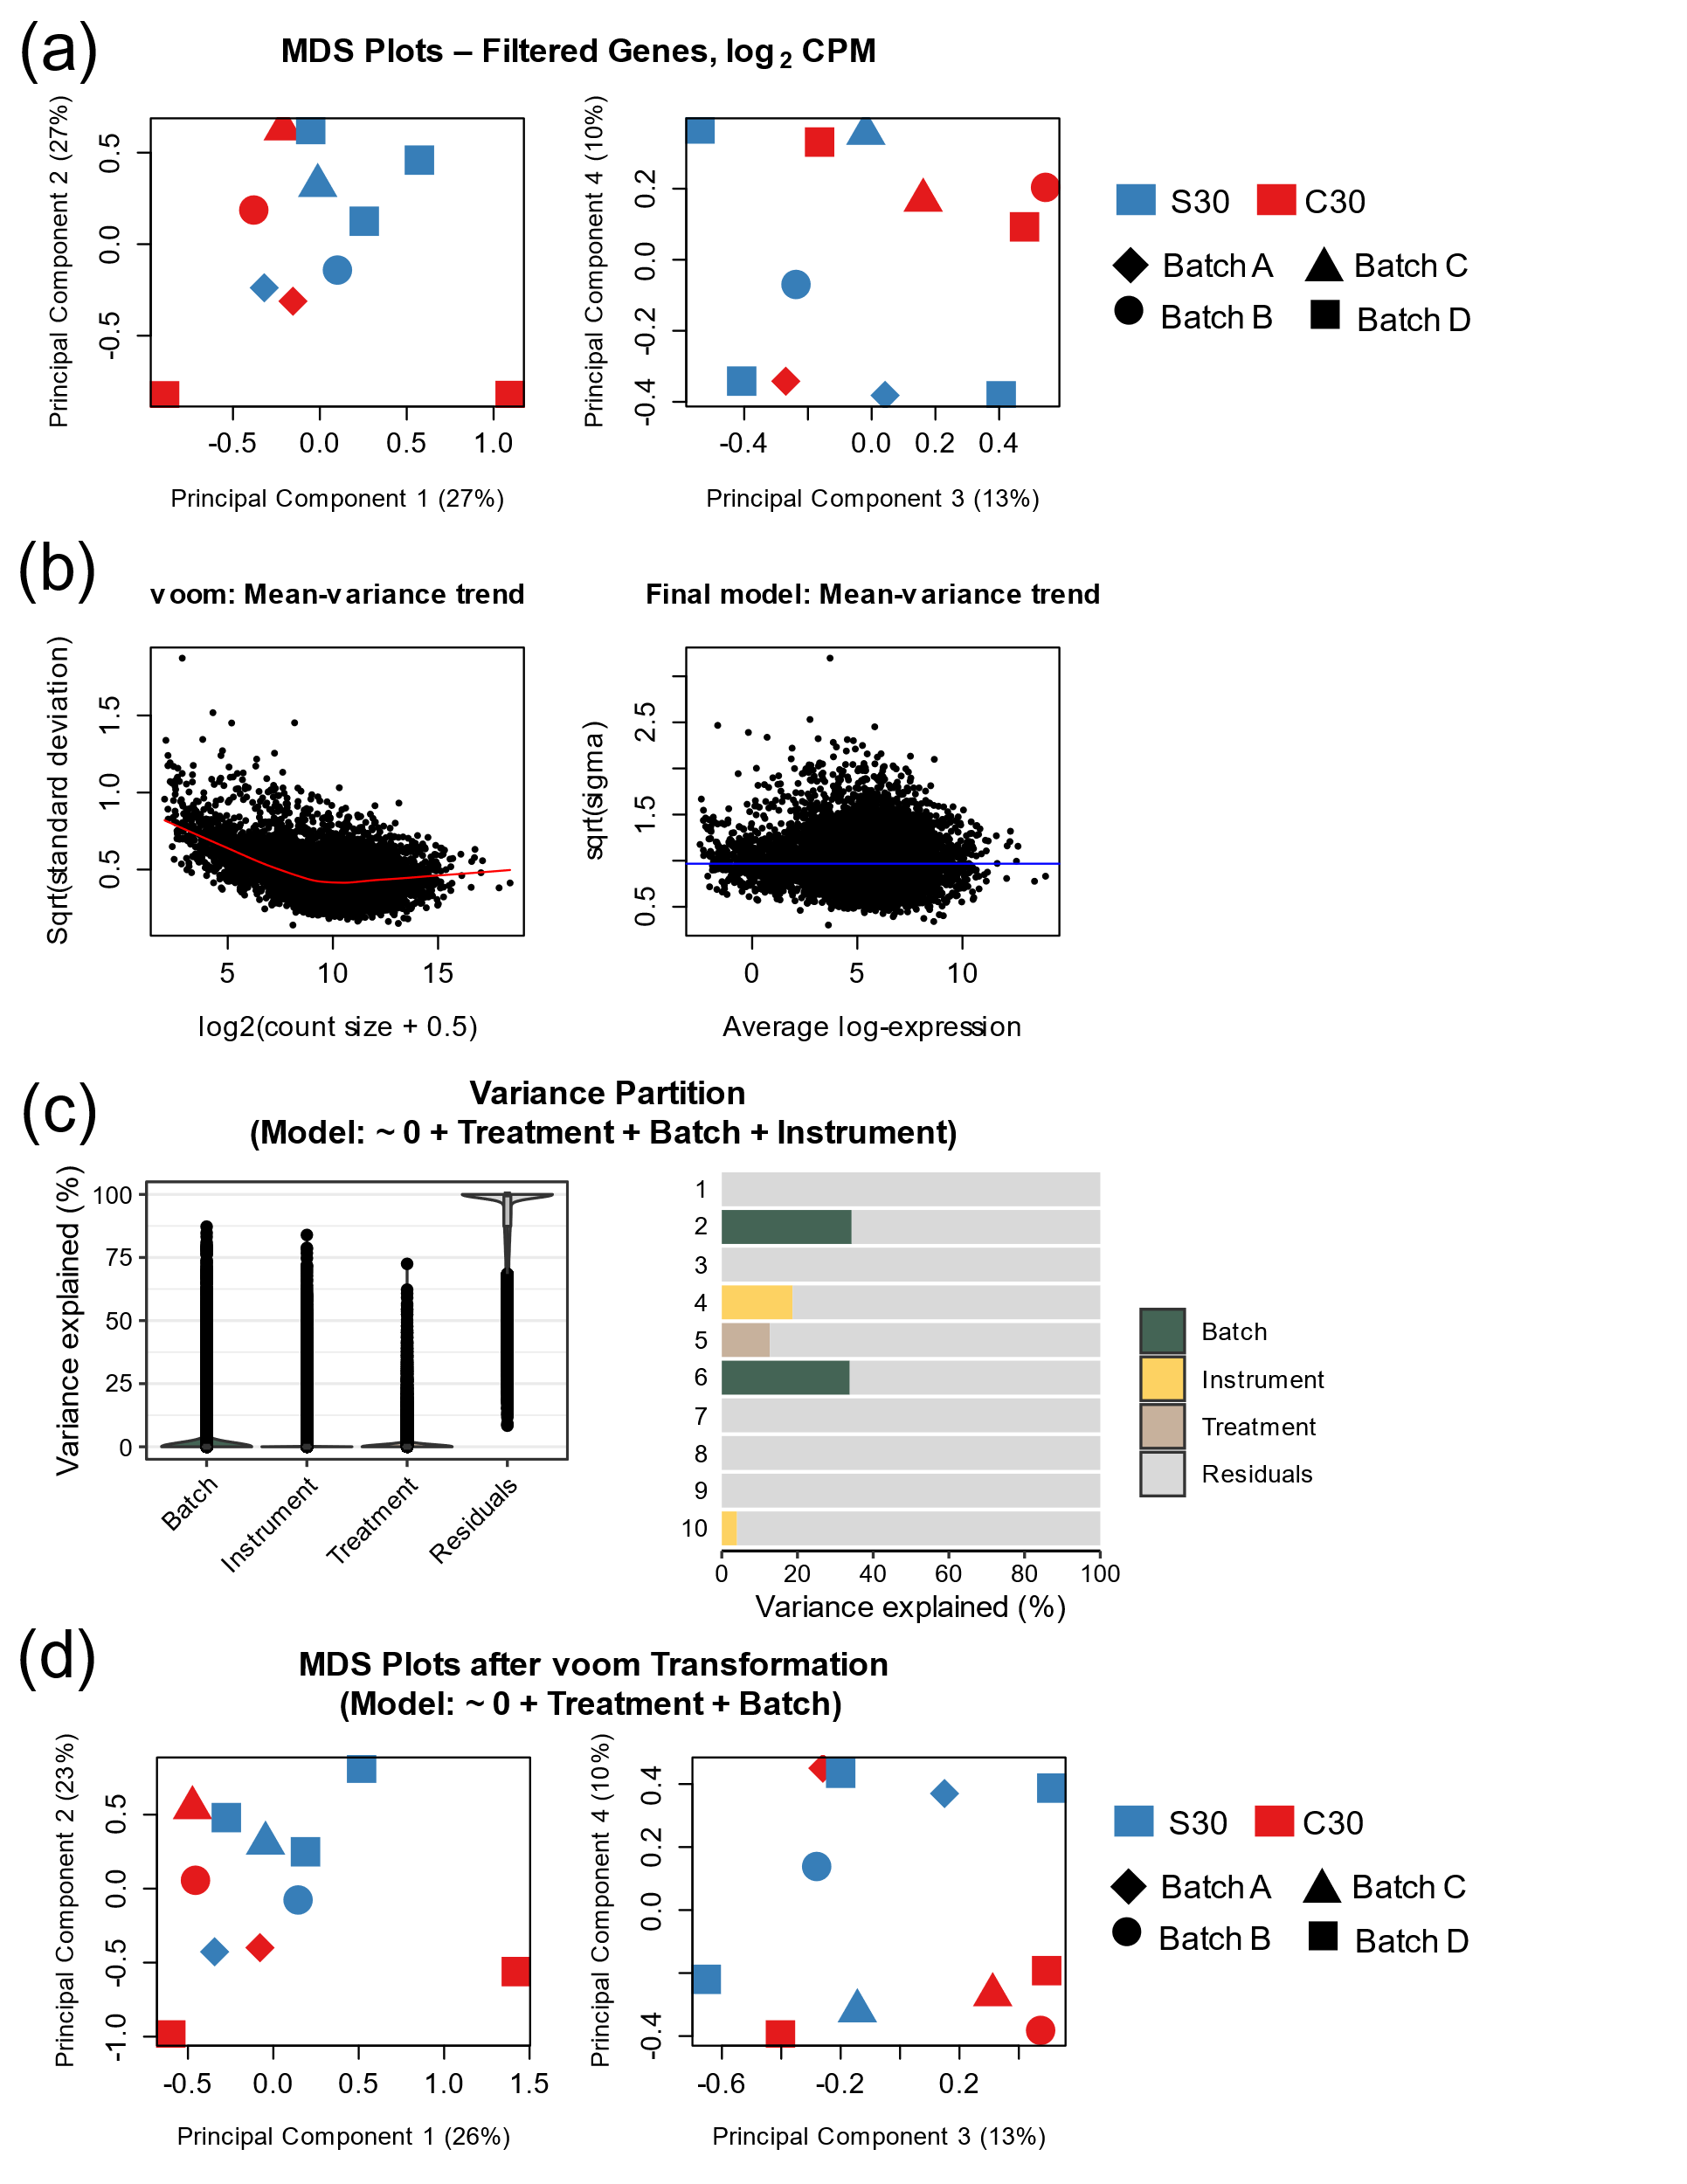
**

**Supplementary Figure S3. RNA-seq processing for Walker S30 vs. C30 dataset.** (**a**, **d**) Multidimensional scaling (MDS) plots for the top 100 genes with the largest fold change differences between groups before (**a**) and after (**d**) voom transformation. Principal components 1 and 2 (left) and 3 and 4 (right) are shown, along with the percentage of variation captured by each component. Blue and red signify the S30 and C30 groups, respectively. Shapes represent different sequencing batches. (**b**) limma voom was used to apply a linear model to the data, including both Treatment group and Batch, based on plots in (**c**) which indicate the highest percentage of variance was explained by Batch. (**c**) Variance partition plots showing the percentage of the gene expression variance explained by the variables sequencing Batch (green), sequencing Instrument (yellow), and Treatment (brown), along with Residuals (gray). Total percentages are shown on the left and are broken down by the first 10 dimensions on the right. Gene expression was measured in CPM with (**a**, **d**) and without (**b**, **c**) log2 transformation.

**
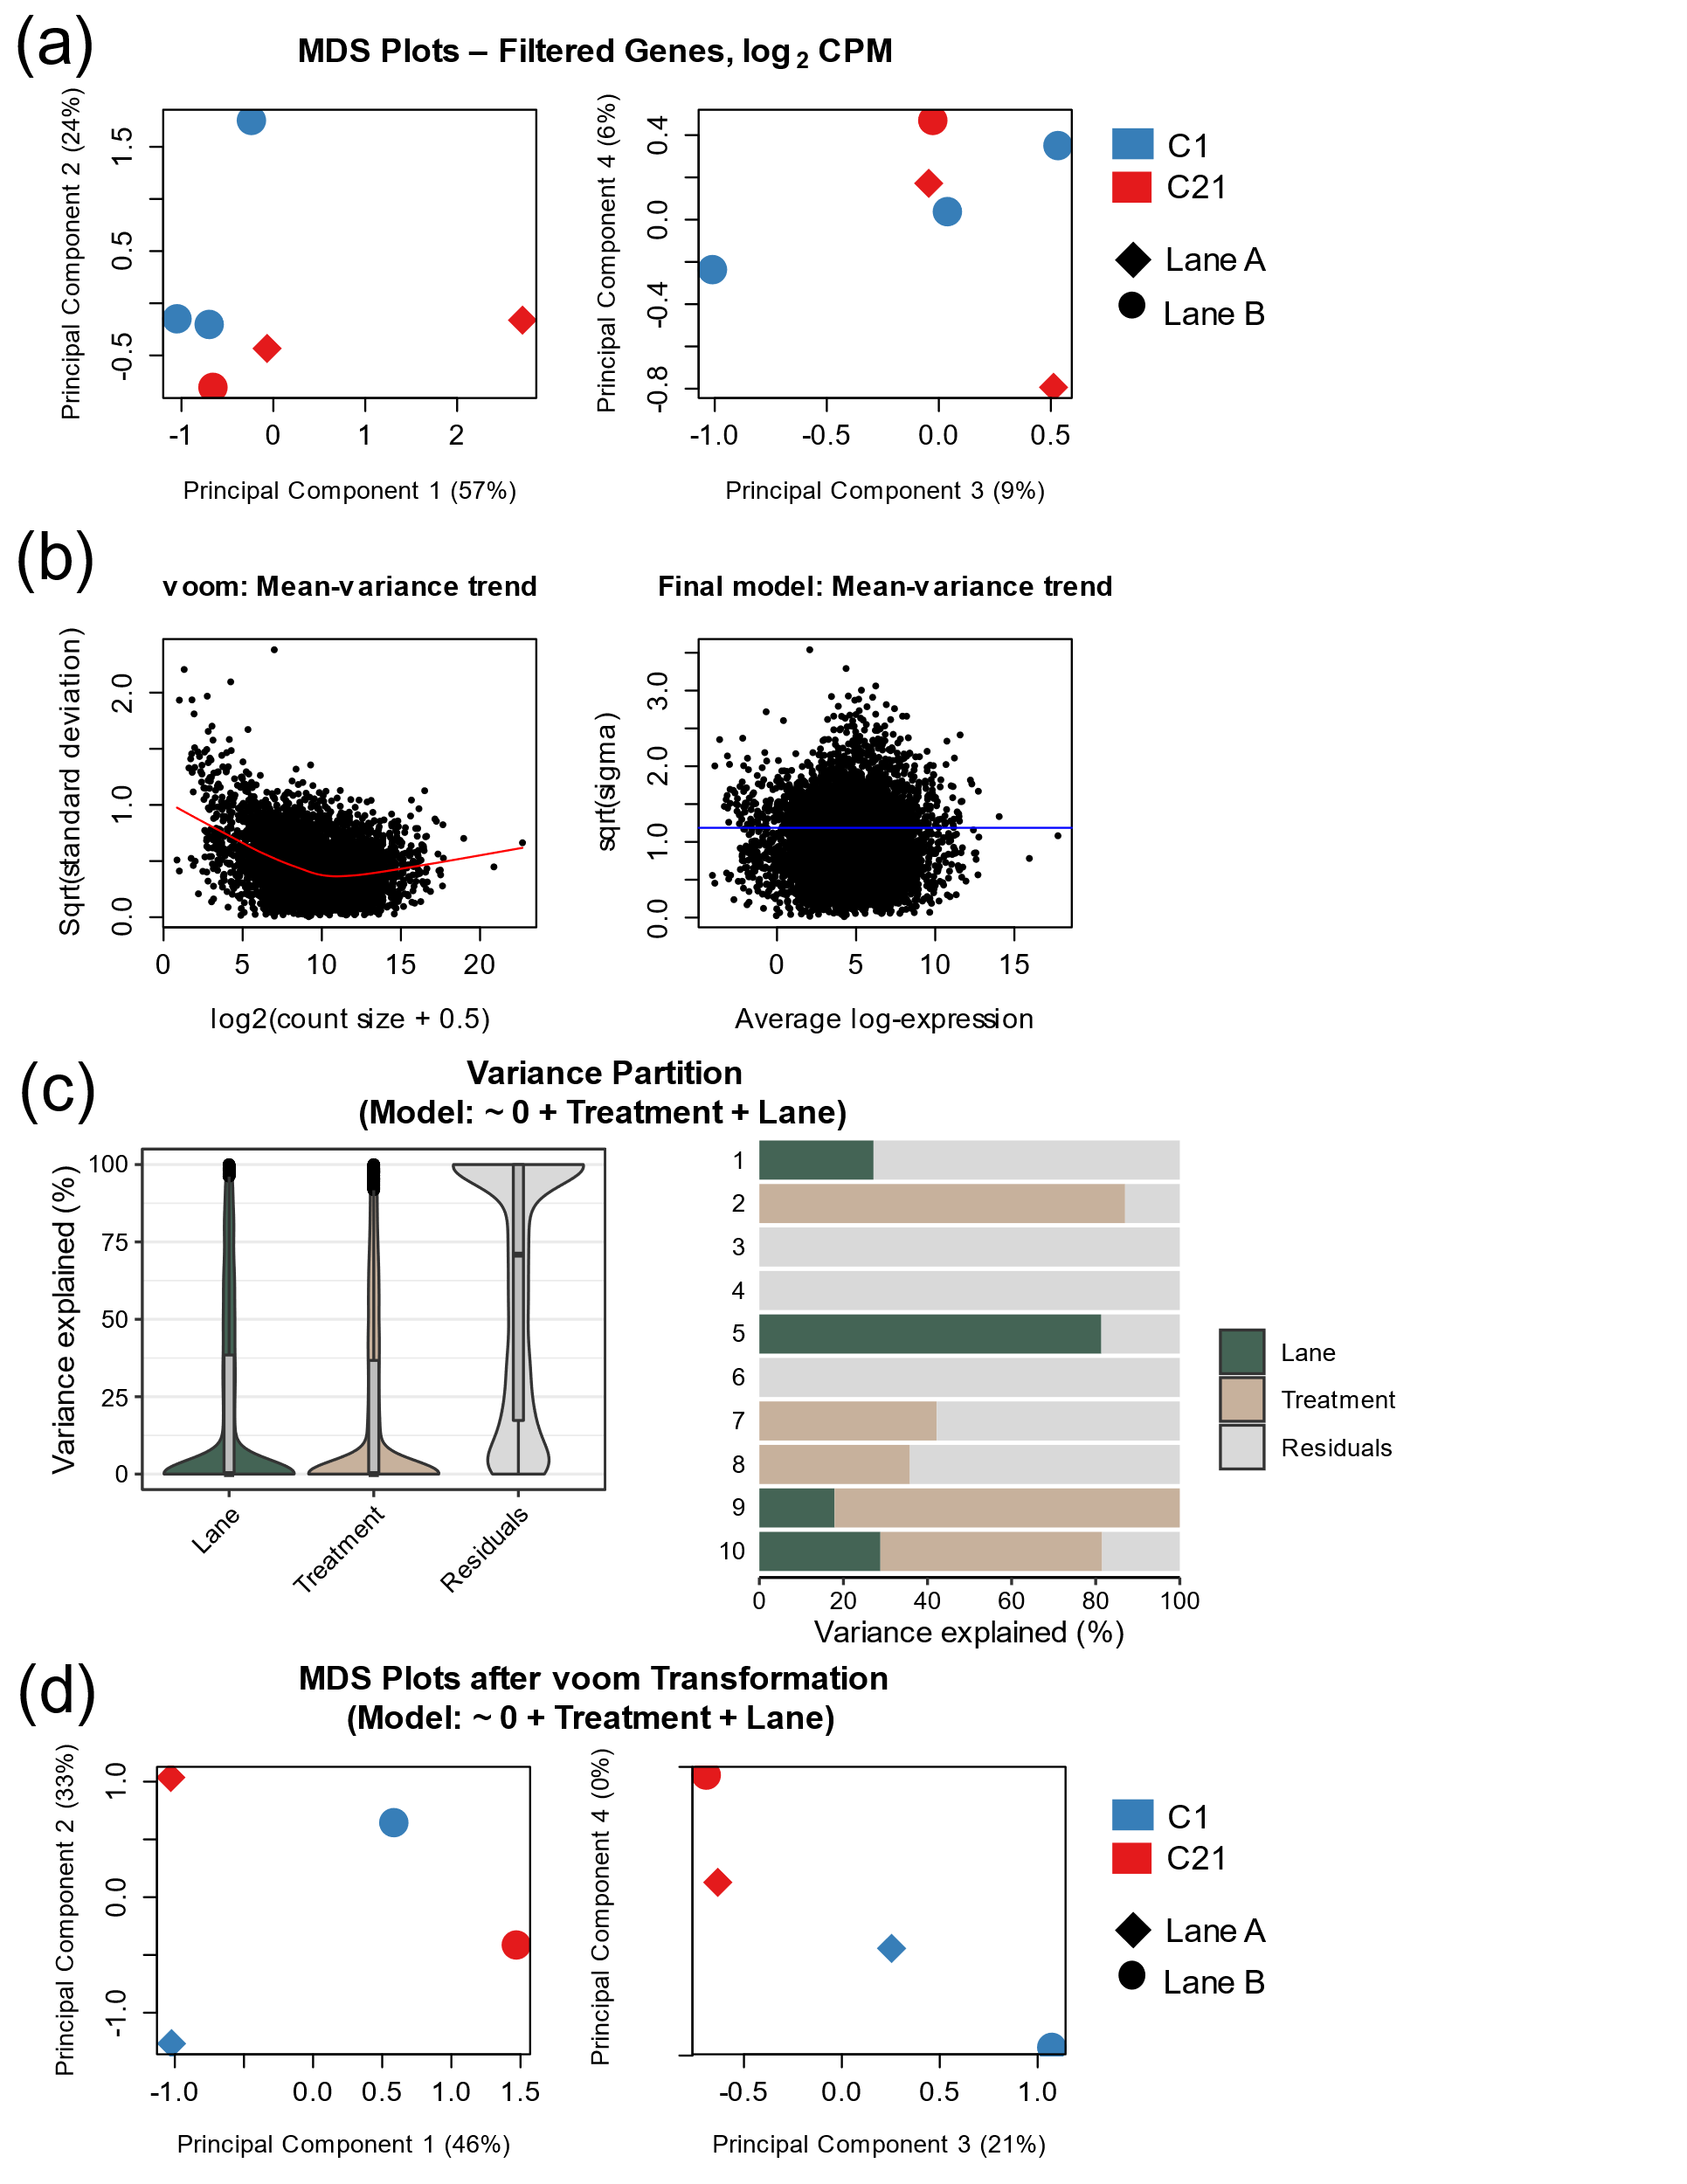
**

**Supplementary Figure S4. RNA-seq processing for Powell C1 vs. C21 dataset.** (**a**, **d**) Multidimensional scaling (MDS) plots for the top 100 genes with the largest fold change differences between groups before (**a**) and after (**d**) voom transformation and removal of 2 outliers. Principal components 1 and 2 (left) and 3 and 4 (right) are shown, along with the percentage of variation captured by each component. Blue and red signify the C1 and C21 groups, respectively. Shapes represent different sequencing lanes. (**b**) limma voom was used to apply a linear model to the data, including both Treatment group and Lane, based on plots (**c**) which indicate the highest percentage of variance was explained by Lane. (**c**) Variance partition plots showing the percentage of the gene expression variance explained by the variables sequencing Lane (green) and Treatment (brown), along with Residuals (gray). Total percentages are shown on the left and are broken down by the first 10 dimensions on the right. Gene expression was measured in CPM with (**a**, **d**) and without (**b**, **c**) log2 transformation.

**Supplementary tables and captions**

Supplementary Tables are attached in a separate Excel workbook. The first sheet of the workbook contains the table captions.
