# Supplementary material for: An approach for prioritizing candidate genes from RNA-seq using preclinical cocaine self-administration datasets as a test case
Source: Research Square preprint supplement (doi:10.21203/rs.3.rs-1551886/v2), 2023-02-07
Supplement: Supplementary file 2 [file bba1e3f80b1edd2e4985e300.xlsx]

## Sheet: Table of Contents
Table of Contents
Table #	Abbreviated Title	Full Title	Caption
1	RNAseq Summary, by Sample	RNAseq Summary, by Sample	Summary of the RNA-seq processing (FASTQ trimming and alignment) for each dataset. bbduk and HISAT2 were used for trimming and alignment, respectively. The trimming parameters for each dataset were as follows: Carpenter, ftm = 5 ref=adapters.fa ktrim=r k=21 mink=11 hdist=2 tbo tpe qtrim=rl trimq=20 minlen=75 maq=20; Walker, ftm = 5 ref=adapters_overrepresented.fa ktrim=r k=21 mink=11 hdist=2 qtri…
2	Overall DE Summary	Overall Differential Expression Summary	Summary of gene and differential expression results related to dispersion and fold change.
3-5	Diff. Exp. {Study}	Differential Expression Results for {Study}	Differential expression results for the 3 studies - Carpenter (Supplementary Table 2), Walker (Supplementary Table 3), and Powell (Supplementary Table 4) - including the log2 fold change of each gene and empirical Bayes statistics. Only genes that passed the filter thresholds were included in the final analysis. Limma voom models were used to calculate the results, as described in the main text. …
6	Shared Genes Summary	Shared Genes and Orthologs Summary	Summary of Candidate genes and their human, mouse, and rat orthologs. The datasets that identified them as DEGs (Carpenter, Walker, and/or Powell) are listed, along with whether they are up- or down-regulated in the prolonged abstinence/high cocaine motivation condition (Carpenter - C28, Walker - S30, Powell - C21) relative to the short abstinence/saline condition (Carpenter - S28, Walker - S30, …
7	Prioritization of Genes	Prioritization of Candidate Genes in Each Dataset	Prioritization of genes as "High", "Medium", or "Low" priority based on conservation and brain expression data. See main text and Table 3 for the methods for prioritizing genes. NOTE: FTH1 is only listed as a gene for Carpenter, not the Powell dataset, since the rat gene was not orthologous with human in the April 2022 release of Ensembl.
8	Sex by Tissue ANOVAs	Sex:Tissue ANOVAs for Candidate Genes	Full results for 2-way, type III ANOVAs analyzing main effects of Sex and Tissue and Sex:Tissue interactions across brain tissues in the Gene-Tissue Expression (GTEx) database. F statistic, ges, and P value are rounded to 4 decimals. * indicates significant main effect or interaction (P < 0.05). Calculations were performed using age-matched samples from males and females >= 55 years of age the GT…
9	Tissue Tukey's, Contrasts	Tukey's Tests Comparing Expression between Tissues	Results of post-hoc Tukey tests comparing expression between brain tissues in the Gene-Tissue Expression (GTEx) database. * indicates significant difference between male and female expression in a tissue. For Tukey statistics for individual tissues, including summary data in the form of compact letter displays (CLDs), see Supplementary Table 11. Calculations were performed using age-matched sampl…
10	Tissue Tukey's, CLD	Tukey's Statistics Comparing Expression across Tissues, Using Compact Letter Displays	Post-hoc Tukey statistics comparing expression across brain tissues in the Gene-Tissue Expression (GTEx) database. Compact letter displays (CLDs) for each gene summarize the differences between tissues. Tissues are assigned letter(s) to reflect their expression relative to other tissues, with tissues that have similar expression levels assigned the same letter(s). For an individual gene, "a" indi…
11	Sex Effect Summary	Summary of Expression for Each Sex for Genes with a Significant Effect of Sex	Genes with a significant main effect of Sex are listed here with the mean and standard deviation (SD) of expression for males and females across all CNS tissues. Calculations were performed using age-matched samples from males and females >= 55 years of age the GTEx database of human RNA-seq data, with gene expression measured in transcripts per million (TPM).
12	Interaction Tukey's	Tukey's Tests for Significant Sex:Tissue Interactions	Full results for post-hoc Tukey tests comparing sex differences in expression across brain tissues in the Gene-Tissue Expression (GTEx) database. Analyses were only performed for genes with a significant Sex:Tissue interaction. Estimate, lower and upper confidence intervals, and P value are rounded to 4 decimals. * indicates significant difference between male and female expression in a tissue. C…
13	Interaction Summary	Summary of Expression for Each Sex for Genes with a Significant Sex:Tissue Interaction	Genes with a significant interaction of Sex:Tissue are listed here with the mean and standard deviation (SD) of expression for males and females individual CNS tissues. Calculations were performed using age-matched samples from males and females >= 55 years of age the GTEx database of human RNA-seq data, with gene expression measured in transcripts per million (TPM).

## Sheet: S1 - RNAseq Summary, by Sample
Study	Library Type	Library Type (Salmon)	SRA Sample ID	Treatment Group	Raw Reads (FASTQ)	Trimmed Reads (FASTQ)	Total Percent Mapped (SAM)
Carpenter	Paired End	ISR	SRS5770730	C28	55407998	43973300	0.991
Carpenter	Paired End	ISR	SRS5770731	C28	54458820	43496502	0.995
Carpenter	Paired End	ISR	SRS5770732	C28	45476699	36715355	0.9949
Carpenter	Paired End	ISR	SRS5770733	C28	44908276	34030859	0.9953
Carpenter	Paired End	ISR	SRS5770734	C28	39606143	30092401	0.9931
Carpenter	Paired End	ISR	SRS5770735	C28	77932075	63418827	0.9929
Carpenter	Paired End	ISR	SRS5770736	S28	51984014	41960542	0.9915
Carpenter	Paired End	ISR	SRS5770737	S28	68053117	54595390	0.9951
Carpenter	Paired End	ISR	SRS5770738	S28	65690977	52679533	0.995
Carpenter	Paired End	ISR	SRS5770739	S28	61730204	49813305	0.9947
Carpenter	Paired End	ISR	SRS5770740	S28	47981128	38983195	0.993
Carpenter	Paired End	ISR	SRS5770741	S28	50668173	40780066	0.9916
Walker	Single End	SR	SRS2926555	C30	29383672	24774659	0.9963
Walker	Single End	SR	SRS2926557	S30	33387920	28488717	0.9972
Walker	Single End	SR	SRS2926558	S30	31377243	24801862	0.997
Walker	Single End	SR	SRS2926560	S30	28358218	23976184	0.997
Walker	Single End	SR	SRS2926561	C30	29268064	24653862	0.9969
Walker	Single End	SR	SRS2926565	C30	36495580	29756022	0.9975
Walker	Single End	SR	SRS2926566	S30	43226652	36915674	0.9974
Walker	Single End	SR	SRS2926568	C30	35410598	27947484	0.9972
Walker	Single End	SR	SRS2926571	S30	30327671	24746709	0.9975
Walker	Single End	SR	SRS2926574	C30	39426318	33638428	0.9974
Walker	Single End	SR	SRS2926576	S30	39298699	33516259	0.9978
Powell	Single End	U	SRS6085261	C1	48451509	36561268	0.9655
Powell	Single End	U	SRS6085262	C21	53892470	40560026	0.9612
Powell	Single End	U	SRS6085267	C1	60147733	42663005	0.9602
Powell	Single End	U	SRS6085268	C1	54742850	38696623	0.9489
Powell	Single End	U	SRS6085269	C21	44878332	32090839	0.9394
Powell	Single End	U	SRS6085272	C21	73551842	52404156	0.9422

## Sheet: S2 - Overall DE Summary
Study	Total Genes Before Filtering	Total Genes After Filtering	Mean Dispersion	Median Dispersion	Mean Fold Change (All Genes)	Median Fold Change (All Genes)	Mean Fold Change (P < 0.05)	Median Fold Change (P < 0.05)
Carpenter	55414	10026	0.0150607	0.00904365	1.0589	1.03818	1.17	1.13
Walker	55414	9948	0.0277647	0.0198768	1.08024	1.05709	1.39	1.32
Powell	30560	7104	0.055731	0.0412406	1.28642	1.14703	2.48	1.59

## Sheet: S3 - Diff. Exp. {Carpenter}
Original Gene ID	Gene Name	Chr	Start	End	Strand	Length	logFC	AveExpr	t	P.Value	adj.P.Val	B
ENSMUSG00000031224	Magee2	X	103898558	103900873	-	2316	-0.544563	3.57322	-5.34378	0.000101405	0.683125	-1.28352
ENSMUSG00000036295	Lrrn3	12	41501667	41536430	-	34764	-0.401596	6.7001	-5.072	0.000166977	0.683125	-0.16182
ENSMUSG00000029033	Acap3	4	155976279	155991708	+	15430	0.241602	7.15399	4.96325	0.000204406	0.683125	-0.304936
ENSMUSG00000045930	Clec14a	12	58311506	58316076	-	4571	0.421486	2.37813	4.36641	0.000636111	0.709731	-2.70026
ENSMUSG00000025151	Maged1	X	93579080	93585749	-	6670	-0.208266	9.53389	-4.33841	0.000671551	0.709731	-1.20161
ENSMUSG00000034403	Pja1	X	98509340	98514879	-	5540	-0.190694	7.84353	-4.30987	0.00070977	0.709731	-1.07646
ENSMUSG00000020674	Pxdn	12	29987607	30067657	+	80051	0.26779	6.53472	4.26361	0.000776523	0.709731	-1.05897
ENSMUSG00000021647	Cartpt	13	100034997	100037599	-	2603	-0.763303	5.18581	-4.22613	0.000835302	0.709731	-1.29312
ENSMUSG00000044320	1700001O22Rik	2	30684781	30693673	-	8893	0.557062	2.558	4.21352	0.000856086	0.709731	-2.68099
ENSMUSG00000038271	Iffo1	6	125122204	125138745	+	16542	0.165013	5.93569	4.11699	0.00103381	0.709731	-1.26567
ENSMUSG00000021774	Ube2e1	14	4137837	4186974	+	49138	-0.170135	5.47292	-4.09323	0.00108307	0.709731	-1.36276
ENSMUSG00000051537	Gm5124	X	21227104	21230861	+	3758	-0.200622	5.40301	-4.08466	0.00110143	0.709731	-1.38726
ENSMUSG00000026469	Xpr1	1	155151447	155293161	-	141715	-0.235531	7.40227	-4.08104	0.00110927	0.709731	-1.30719
ENSMUSG00000087322	Gm16075	11	75751795	75752320	+	526	0.650949	0.791092	3.99923	0.00130268	0.709731	-3.60933
ENSMUSG00000086968	4933431E20Rik	3	107796166	107803529	-	7364	0.157048	6.84989	3.92705	0.00150177	0.709731	-1.46492
ENSMUSG00000028541	B4galt2	4	117726457	117740684	-	14228	0.185333	6.52363	3.91842	0.00152757	0.709731	-1.47223
ENSMUSG00000040543	Pitpnm3	11	71938354	72026604	-	88251	0.322884	6.66739	3.90354	0.0015731	0.709731	-1.49267
ENSMUSG00000031428	Zcchc18	X	135893904	135899221	+	5318	-0.172805	8.60973	-3.81641	0.00186886	0.709731	-1.70313
ENSMUSG00000041141	Pnmal1	7	16693604	16698532	+	4929	-0.126104	7.79553	-3.78375	0.00199376	0.709731	-1.69013
ENSMUSG00000006373	Pgrmc1	X	35861859	35869732	+	7874	-0.162854	8.21953	-3.76322	0.00207657	0.709731	-1.74095
ENSMUSG00000013629	Cad	5	31212124	31235823	+	23700	-0.195624	4.65731	-3.75431	0.0021136	0.709731	-1.95061
ENSMUSG00000022261	Sdc2	15	32920869	33035081	+	114213	-0.205064	6.23724	-3.71871	0.0022683	0.709731	-1.72483
ENSMUSG00000026207	Speg	1	75351941	75408964	+	57024	0.171244	7.87725	3.71648	0.0022784	0.709731	-1.77674
ENSMUSG00000067344	Rps25-ps1	6	145212126	145212503	+	378	1.38875	-2.55339	3.69898	0.00235893	0.709731	-4.28602
ENSMUSG00000033760	Rbm4b	19	4806525	4817093	+	10569	-0.210156	4.50072	-3.68454	0.00242761	0.709731	-2.07729
ENSMUSG00000036699	Zcchc12	X	35459557	35462811	+	3255	-0.320277	7.85437	-3.68371	0.00243161	0.709731	-1.81551
ENSMUSG00000086496	Gm14204	2	158437392	158452643	-	15252	-0.331921	4.81132	-3.68265	0.00243675	0.709731	-1.985
ENSMUSG00000035735	Dagla	19	10222629	10282241	-	59613	0.175162	6.78468	3.67278	0.00248498	0.709731	-1.7793
ENSMUSG00000067578	Cbln4	2	171878153	171885386	-	7234	-0.658488	3.66675	-3.66441	0.00252669	0.709731	-2.45867
ENSMUSG00000034157	Cipc	12	86993817	87012136	+	18320	0.187763	7.19232	3.64766	0.00261221	0.709731	-1.82451
ENSMUSG00000029009	Mthfr	4	148123534	148144008	+	20475	0.219648	5.51451	3.62976	0.00270688	0.709731	-1.90587
ENSMUSG00000053310	Nrgn	9	37455788	37464200	-	8413	0.626413	8.64294	3.61339	0.00279651	0.709731	-1.94803
ENSMUSG00000040033	Stat2	10	128106428	128128718	+	22291	0.172559	4.72789	3.56829	0.0030592	0.709731	-2.13829
ENSMUSG00000026192	Atic	1	71596309	71618790	+	22482	-0.183714	4.93147	-3.55157	0.0031628	0.709731	-2.10291
ENSMUSG00000026883	Dab2ip	2	35448278	35621006	+	172729	0.274707	6.81405	3.5379	0.0032501	0.709731	-1.95138
ENSMUSG00000030062	Rpn1	6	88061464	88082286	+	20823	-0.18338	7.08439	-3.53781	0.00325067	0.709731	-1.95709
ENSMUSG00000018574	Acadvl	11	69901009	69906237	-	5229	-0.159878	5.52888	-3.51711	0.00338757	0.709731	-2.03876
ENSMUSG00000050711	Scg2	1	79412386	79417837	-	5452	-0.330185	9.17516	-3.49731	0.00352393	0.709731	-2.1187
ENSMUSG00000026787	Gad2	2	22512217	22583886	+	71670	-0.254943	9.52329	-3.49394	0.00354765	0.709731	-2.14496
ENSMUSG00000026678	Rgs5	1	169483070	169523382	+	40313	0.246607	6.83162	3.48961	0.00357841	0.709731	-2.01297
ENSMUSG00000056596	Trnp1	4	133218411	133225861	-	7451	0.357302	7.27994	3.48869	0.003585	0.709731	-2.02914
ENSMUSG00000047409	Ctdspl	9	118755521	118873066	+	117546	0.191259	6.03451	3.4715	0.00370995	0.709731	-2.04936
ENSMUSG00000025579	Gaa	11	119158713	119176280	+	17568	-0.230195	9.25027	-3.46712	0.00374251	0.709731	-2.1593
ENSMUSG00000091712	Sec14l5	16	4964973	5005135	+	40163	0.260313	5.4269	3.46035	0.00379341	0.709731	-2.12507
ENSMUSG00000003378	Grik5	7	24709274	24771771	-	62498	0.230527	8.23924	3.45612	0.00382553	0.709731	-2.11559
ENSMUSG00000049804	Armcx4	X	133587268	133597506	+	10239	-0.208499	6.42453	-3.45602	0.00382625	0.709731	-2.0524
ENSMUSG00000057614	Gnai1	5	18470133	18565353	-	95221	-0.209737	7.11638	-3.45548	0.00383037	0.709731	-2.06294
ENSMUSG00000032320	Rcn2	9	55949129	55969166	+	20038	-0.160319	6.59098	-3.44806	0.00388748	0.709731	-2.06135
ENSMUSG00000046447	Camk2n1	4	138181625	138187434	+	5810	0.385658	9.57664	3.4419	0.00393559	0.709731	-2.20967
ENSMUSG00000026344	Lypd1	1	125795359	125840838	-	45480	-0.443619	7.29104	-3.44179	0.00393642	0.709731	-2.08761
ENSMUSG00000050022	Amz1	5	140709882	140747194	+	37313	0.310713	5.63048	3.44174	0.00393679	0.709731	-2.1233
ENSMUSG00000031347	Cetn2	X	71957138	71962017	-	4880	-0.154476	4.93657	-3.4261	0.00406157	0.709731	-2.24705
ENSMUSG00000059173	Pde1a	2	79664797	79959802	-	295006	-0.340095	7.19594	-3.41632	0.00414157	0.709731	-2.11597
ENSMUSG00000039059	Hrh3	2	179741258	179746281	-	5024	0.254543	7.57954	3.39155	0.00435135	0.709731	-2.16466
ENSMUSG00000038894	Irs2	8	11034681	11058458	-	23778	-0.285757	6.21733	-3.38975	0.00436705	0.709731	-2.14273
ENSMUSG00000035382	Pcsk7	9	45817795	45841024	+	23230	0.194611	5.50094	3.38344	0.00442232	0.709731	-2.20895
ENSMUSG00000036502	Tmem255a	X	37285450	37341316	-	55867	-0.590744	5.14157	-3.38116	0.00444252	0.709731	-2.26593
ENSMUSG00000055866	Per2	1	91343704	91387046	-	43343	0.293479	5.94448	3.36248	0.00461124	0.709731	-2.19482
ENSMUSG00000024969	Mark2	19	7252761	7319225	-	66465	0.142456	7.19985	3.35703	0.00466161	0.709731	-2.1926
ENSMUSG00000025089	Gfra1	19	58224036	58444341	-	220306	-0.189303	6.82299	-3.3442	0.00478248	0.709731	-2.19726
ENSMUSG00000046607	Hrk	5	118302713	118327543	+	24831	0.27279	6.18645	3.33495	0.00487159	0.709731	-2.21713
ENSMUSG00000046717	Igbp1b	6	138634087	138635542	-	1456	-0.492194	0.422021	-3.33349	0.00488578	0.709731	-3.90642
ENSMUSG00000013076	Amotl1	9	14453262	14556352	-	103091	-0.195197	6.50483	-3.32887	0.00493103	0.709731	-2.21514
ENSMUSG00000025902	Sox17	1	4561154	4567577	-	6424	0.308876	2.93871	3.32614	0.00495802	0.709731	-3.04747
ENSMUSG00000079224	Gm6565	6	100581644	100582081	+	438	-0.642359	-2.18847	-3.322	0.00499914	0.709731	-4.3105
ENSMUSG00000031984	2810004N23Rik	8	125563684	125589859	-	26176	-0.128331	4.90827	-3.31714	0.0050478	0.709731	-2.37994
ENSMUSG00000031227	Magee1	X	104163984	104167533	+	3550	-0.18158	7.32783	-3.31526	0.00506682	0.709731	-2.2504
ENSMUSG00000031883	Car7	8	105261321	105276975	+	15655	0.25444	4.39894	3.31006	0.00511963	0.709731	-2.51542
ENSMUSG00000029017	Pmpcb	5	21942139	21962150	+	20012	-0.126297	5.58392	-3.30791	0.00514164	0.709731	-2.29159
ENSMUSG00000045284	Dcaf12l1	X	43875447	43879074	-	3628	-0.173677	5.63994	-3.30453	0.00517647	0.709731	-2.28999
ENSMUSG00000039713	Plekhg5	4	152156955	152199857	+	42903	0.216284	6.14381	3.30106	0.00521245	0.709731	-2.26173
ENSMUSG00000032536	Trak1	9	121126568	121303984	+	177417	0.125611	7.73176	3.27334	0.00550878	0.709731	-2.32076
ENSMUSG00000068748	Ptprz1	6	22875501	23052915	+	177415	-0.231261	7.98307	-3.27313	0.00551111	0.709731	-2.3317
ENSMUSG00000051351	Zfp46	4	136011994	136021253	+	9260	0.27539	6.20837	3.27306	0.00551192	0.709731	-2.29595
ENSMUSG00000037579	Kcnh3	15	99122742	99140698	+	17957	0.194535	7.64056	3.26102	0.00564584	0.709731	-2.33266
ENSMUSG00000047959	Kcna3	3	106943485	106945386	+	1902	-0.257859	2.91931	-3.25142	0.00575506	0.709731	-3.10594
ENSMUSG00000049907	Rasl11b	5	74355947	74360142	+	4196	0.471768	4.52741	3.24911	0.00578166	0.709731	-2.55421
ENSMUSG00000070047	Fat1	8	45388484	45505294	+	116811	-0.314799	6.84528	-3.23807	0.00591044	0.709731	-2.33509
ENSMUSG00000027642	Rpn2	2	157120937	157168239	+	47303	-0.150326	7.43845	-3.23558	0.00593986	0.709731	-2.35683
ENSMUSG00000033287	Kctd17	15	78312764	78323503	+	10740	0.326762	7.52708	3.23418	0.0059564	0.709731	-2.36252
ENSMUSG00000030096	Slc6a6	6	91661034	91736047	+	75014	0.223108	8.18622	3.21595	0.00617698	0.709731	-2.41186
ENSMUSG00000032314	Etfa	9	55361792	55419527	-	57736	-0.124473	5.09096	-3.21481	0.00619111	0.709731	-2.46993
ENSMUSG00000014226	Cacybp	1	160029937	160040445	-	10509	-0.154583	5.68215	-3.2116	0.00623088	0.709731	-2.40345
ENSMUSG00000030256	Bhlhe41	6	145803969	145811284	-	7316	0.23616	5.89045	3.20018	0.00637439	0.709731	-2.40471
ENSMUSG00000036422	Pcdh8	14	80004215	80008752	-	4538	-0.675319	4.8109	-3.18713	0.00654239	0.709731	-2.55649
ENSMUSG00000050410	Tcf19	17	35823631	35827721	-	4091	0.408809	1.8446	3.18036	0.00663129	0.709731	-3.54748
ENSMUSG00000034463	Scara3	14	66156843	66191384	-	34542	0.23441	4.91875	3.16767	0.00680116	0.709731	-2.55744
ENSMUSG00000026019	Wdr12	1	60108944	60137804	-	28861	-0.133093	5.24857	-3.16194	0.00687933	0.709731	-2.51209
ENSMUSG00000048721	Fndc9	11	46126358	46130699	+	4342	-0.323209	4.44499	-3.16001	0.00690586	0.709731	-2.66235
ENSMUSG00000044254	Pcsk9	4	106299526	106321526	-	22001	0.533351	3.46288	3.14936	0.00705402	0.709731	-2.99326
ENSMUSG00000030157	Clec2d	6	129157578	129163497	+	5920	0.282542	2.01812	3.14481	0.00711827	0.709731	-3.50458
ENSMUSG00000022490	Ppp1r1a	15	103438706	103446430	-	7725	0.205014	6.83907	3.14282	0.00714653	0.709731	-2.46013
ENSMUSG00000071723	Gspt2	X	93679675	93686850	+	7176	-0.208542	5.41634	-3.13994	0.00718768	0.709731	-2.51964
ENSMUSG00000047238	Mageh1	X	151819162	151820571	-	1410	-0.167929	5.11167	-3.13667	0.00723472	0.709731	-2.56122
ENSMUSG00000000308	Ckmt1	2	121188195	121194218	+	6024	-0.164804	7.68213	-3.13382	0.00727589	0.709731	-2.4963
ENSMUSG00000001946	Esam	9	37439374	37449615	+	10242	0.293846	4.20792	3.12717	0.00737298	0.709731	-2.7646
ENSMUSG00000024151	Msh2	17	87979758	88031141	+	51384	-0.134903	5.09161	-3.11789	0.00751056	0.709731	-2.58678
ENSMUSG00000049313	Sorl1	9	41876016	42035593	-	159578	-0.203182	8.37192	-3.11672	0.0075281	0.709731	-2.54348
ENSMUSG00000055692	Tmem191c	16	17093941	17101093	+	7153	0.173573	6.71026	3.11637	0.00753331	0.709731	-2.49301
ENSMUSG00000031442	Mcf2l	8	12923806	13070905	+	147100	0.189093	7.61984	3.10257	0.00774328	0.709731	-2.53407
ENSMUSG00000041870	Ankrd13a	5	114912738	114944261	+	31524	0.209258	6.09201	3.08772	0.00797564	0.709731	-2.53927
ENSMUSG00000027490	E2f1	2	154401327	154411812	-	10486	0.323368	3.54054	3.08546	0.00801156	0.709731	-3.0168
ENSMUSG00000044224	Dnajc21	15	10446842	10470602	-	23761	-0.166651	3.8286	-3.0833	0.00804613	0.709731	-2.91853
ENSMUSG00000020436	Gabrg2	11	41801030	41891684	-	90655	-0.242367	7.05638	-3.08091	0.00808453	0.709731	-2.54386
ENSMUSG00000032067	Pts	9	50432917	50440024	-	7108	0.12883	4.85561	3.08047	0.00809155	0.709731	-2.66933
ENSMUSG00000023830	Igf2r	17	12901293	12988551	-	87259	-0.179135	5.85908	-3.08017	0.0080964	0.709731	-2.55848
ENSMUSG00000032076	Cadm1	9	47441471	47769413	+	327943	-0.209759	7.66901	-3.0757	0.00816882	0.709731	-2.57012
ENSMUSG00000047710	Champ1	8	13919641	13931639	+	11999	-0.133501	5.55157	-3.07139	0.00823913	0.709731	-2.59228
ENSMUSG00000046329	Slc25a23	17	57350711	57366863	-	16153	0.138394	8.89148	3.07086	0.00824794	0.709731	-2.62153
ENSMUSG00000025268	Maged2	X	149589366	149597341	-	7976	-0.176523	5.5775	-3.0697	0.00826697	0.709731	-2.59217
ENSMUSG00000040260	Daam2	17	49763050	49871371	-	108322	0.150523	7.00667	3.06425	0.00835706	0.709731	-2.56517
ENSMUSG00000024764	Naa40	19	7203033	7218548	-	15516	0.210261	5.97329	3.06391	0.00836276	0.709731	-2.57507
ENSMUSG00000057193	Slc44a2	9	21231994	21266324	+	34331	0.117145	5.80266	3.06375	0.00836548	0.709731	-2.58394
ENSMUSG00000008604	Ubqln4	3	88461065	88477032	+	15968	0.160549	7.41613	3.05236	0.00855716	0.709731	-2.59182
ENSMUSG00000042099	Kank3	17	34029493	34041892	+	12400	0.163725	4.52109	3.05169	0.00856857	0.709731	-2.76701
ENSMUSG00000029916	Agk	6	40302106	40373696	+	71591	-0.140174	5.48795	-3.05127	0.00857579	0.709731	-2.62333
ENSMUSG00000024220	Zfp523	17	28396103	28424860	+	28758	0.173201	7.10487	3.04276	0.00872218	0.709731	-2.5955
ENSMUSG00000020978	Klhdc2	12	69343455	69357461	+	14007	-0.142585	6.45975	-3.02506	0.00903463	0.709731	-2.61118
ENSMUSG00000111837	Gm47135	9	122511807	122512706	+	900	0.346629	2.16091	3.01774	0.00916704	0.709731	-3.53103
ENSMUSG00000034845	Plvap	8	71950409	71964396	-	13988	0.216867	3.60843	3.01541	0.00920971	0.709731	-3.05567
ENSMUSG00000041658	Rragb	X	151922977	151954939	+	31963	-0.177411	6.21829	-3.01475	0.00922174	0.709731	-2.6285
ENSMUSG00000024966	Stip1	19	6998070	7017335	-	19266	-0.209835	7.2829	-2.99398	0.00961038	0.709731	-2.6629
ENSMUSG00000067377	Tspan6	X	132791817	132799178	-	7362	-0.35897	3.51299	-2.99305	0.0096281	0.709731	-3.10465
ENSMUSG00000000530	Acvrl1	15	101026403	101043217	+	16815	0.474109	4.72256	2.99274	0.00963397	0.709731	-2.80189
ENSMUSG00000020154	Ptprb	10	116111428	116225440	+	114013	0.287424	6.14134	2.99207	0.00964682	0.709731	-2.66238
ENSMUSG00000034390	Cmip	8	117983803	118186169	+	202367	-0.173542	7.30261	-2.98091	0.00986317	0.709731	-2.6804
ENSMUSG00000020368	Canx	11	50184788	50216500	-	31713	-0.158546	8.31287	-2.98038	0.00987355	0.709731	-2.71262
ENSMUSG00000069833	Ahnak	19	8966648	9054278	+	87631	0.258507	5.74109	2.97536	0.00997241	0.709731	-2.70216
ENSMUSG00000051652	Lrrc3	10	77733409	77738370	-	4962	0.22987	4.15332	2.97214	0.0100364	0.709731	-2.94022
ENSMUSG00000022098	Bmp1	14	70711998	70757674	-	45677	0.183793	5.25563	2.96976	0.010084	0.709731	-2.74919
ENSMUSG00000036376	Abt1	13	23602531	23608036	-	5506	-0.196363	4.04864	-2.96546	0.0101703	0.709731	-2.97181
ENSMUSG00000085733	Arhgap27os1	11	103254039	103255477	+	1439	0.541021	0.150022	2.96436	0.0101927	0.709731	-4.07202
ENSMUSG00000014551	Mrps25	6	92146506	92161014	-	14509	-0.113656	5.30673	-2.96258	0.0102286	0.709731	-2.75158
ENSMUSG00000040907	Atp1a3	7	24677592	24705383	-	27792	-0.180344	11.095	-2.95392	0.010406	0.709731	-2.85618
ENSMUSG00000025613	Cct8	16	87280214	87292761	-	12548	-0.137722	7.3606	-2.95222	0.0104411	0.709731	-2.71918
ENSMUSG00000024661	Fth1	19	9957962	9962462	+	4501	0.240969	10.4128	2.94906	0.0105068	0.709731	-2.83286
ENSMUSG00000027134	Lpcat4	2	112069813	112077456	+	7644	0.216912	6.55172	2.94843	0.01052	0.709731	-2.71229
ENSMUSG00000060802	B2m	2	121978167	121983564	+	5398	0.229258	5.40196	2.94297	0.0106345	0.709731	-2.76853
ENSMUSG00000023367	Tmem176a	6	48817853	48824005	+	6153	-0.224471	3.87889	-2.94154	0.0106648	0.709731	-3.04228
ENSMUSG00000022895	Ets2	16	95502942	95522095	+	19154	-0.166845	7.10052	-2.9409	0.0106783	0.709731	-2.72718
ENSMUSG00000025364	Pa2g4	10	128393635	128401856	-	8222	-0.110405	5.98934	-2.93992	0.0106992	0.709731	-2.73324
ENSMUSG00000004894	Hapln2	3	87929057	87934890	-	5834	0.245376	4.56492	2.93874	0.0107241	0.709731	-2.88687
ENSMUSG00000059447	Hadhb	5	30360246	30389591	+	29346	-0.137216	6.13315	-2.93626	0.010777	0.709731	-2.73301
ENSMUSG00000041115	Iqsec2	X	150927264	151008232	+	80969	0.132416	7.60875	2.93519	0.0107999	0.709731	-2.74843
ENSMUSG00000029528	Pxn	5	115644735	115694046	+	49312	0.199734	4.95023	2.93493	0.0108056	0.709731	-2.82852
ENSMUSG00000024530	Prelid3a	18	67597936	67612905	+	14970	0.201582	5.8166	2.93337	0.0108391	0.709731	-2.75105
ENSMUSG00000037553	Zdhhc18	4	133332610	133377465	-	44856	0.12189	6.21553	2.92992	0.0109135	0.709731	-2.74006
ENSMUSG00000027968	Larp7	3	127330363	127346998	-	16636	-0.163046	4.53065	-2.92207	0.0110845	0.709731	-2.90815
ENSMUSG00000028041	Adam15	3	89245849	89257303	-	11455	0.103347	6.65208	2.91986	0.0111334	0.709731	-2.74918
ENSMUSG00000029466	Anapc7	5	122559756	122582975	+	23220	-0.112447	5.32513	-2.91538	0.0112326	0.709731	-2.80845
ENSMUSG00000003872	Lin7b	7	45017315	45020007	-	2693	0.200207	5.79144	2.90995	0.011354	0.709731	-2.78249
ENSMUSG00000032050	Rdx	9	51958473	52011763	+	53291	-0.153541	6.37961	-2.90776	0.0114036	0.709731	-2.76545
ENSMUSG00000117725	Gm50240	17	30795274	30801568	+	6295	-0.205316	2.93886	-2.90761	0.0114069	0.709731	-3.35631
ENSMUSG00000095041		JH584304.1	52190	59690	-	7501	0.47798	8.46695	2.90598	0.0114437	0.709731	-2.8115
ENSMUSG00000048644	Ctxn1	8	4307660	4309274	-	1615	0.168523	8.84572	2.90474	0.011472	0.709731	-2.82527
ENSMUSG00000033585	Ndn	7	61996317	62000010	+	3694	-0.556784	7.33683	-2.90187	0.0115373	0.709731	-2.78375
ENSMUSG00000024084	Qpct	17	79359335	79397807	+	38473	-0.250856	4.49716	-2.8974	0.01164	0.709731	-2.94242
ENSMUSG00000027520	Zdbf2	1	63312424	63353735	+	41312	-0.206955	5.82136	-2.88359	0.0119626	0.709731	-2.81341
ENSMUSG00000010554	Mettl16	11	74661656	74719351	+	57696	-0.193769	5.13662	-2.87856	0.0120824	0.709731	-2.87245
ENSMUSG00000006932	Ctnnb1	9	120758282	120789573	+	31292	-0.113466	9.08378	-2.86912	0.0123103	0.709731	-2.87746
ENSMUSG00000000184	Ccnd2	6	127102125	127129156	-	27032	0.335651	5.90386	2.86728	0.0123551	0.709731	-2.8331
ENSMUSG00000030495	Slc7a10	7	34885810	34900539	+	14730	-0.249079	5.02075	-2.86448	0.0124237	0.709731	-2.90237
ENSMUSG00000032517	Mobp	9	119978773	120010550	+	31778	0.210306	8.28766	2.8633	0.0124528	0.709731	-2.85946
ENSMUSG00000025025	Mxi1	19	53298949	53364241	+	65293	0.133762	6.50226	2.86311	0.0124574	0.709731	-2.82359
ENSMUSG00000035936	Aldh5a1	13	25091562	25121644	-	30083	-0.146568	7.47181	-2.86087	0.0125128	0.709731	-2.84023
ENSMUSG00000015224	Cyp2j9	4	96456666	96479815	-	23150	-0.194313	4.55934	-2.85977	0.0125401	0.709731	-2.97353
ENSMUSG00000058624	Gda	19	21368671	21450809	-	82139	-0.193226	8.3832	-2.85848	0.012572	0.709731	-2.86817
ENSMUSG00000027933	Ints3	3	90298695	90340929	-	42235	-0.111149	6.48342	-2.85731	0.0126012	0.709731	-2.83064
ENSMUSG00000019851	Perp	10	18720768	18732821	+	12054	-0.223491	3.17624	-2.8552	0.0126538	0.709731	-3.32611
ENSMUSG00000029419	Ajm1	2	25465428	25471769	-	6342	0.172907	7.58072	2.85289	0.0127118	0.709731	-2.85346
ENSMUSG00000009739	Pou6f1	15	100473199	100497865	-	24667	0.135979	7.05445	2.85282	0.0127136	0.709731	-2.84146
ENSMUSG00000029147	Ppm1g	5	31360008	31378031	-	18024	-0.112436	6.24444	-2.85241	0.0127238	0.709731	-2.83981
ENSMUSG00000041231	Ublcp1	11	44345398	44361325	-	15928	-0.160213	5.30241	-2.85182	0.0127388	0.709731	-2.88943
ENSMUSG00000044005	Gls2	10	128030326	128045873	+	15548	0.211699	4.05531	2.84977	0.0127904	0.709731	-3.09111
ENSMUSG00000036062	Phf24	4	42916660	42944752	+	28093	0.142118	9.14731	2.84544	0.0129005	0.709731	-2.90887
ENSMUSG00000037872	Ackr1	1	173159453	173161317	-	1865	0.168389	5.70838	2.84042	0.013029	0.709731	-2.87585
ENSMUSG00000037235	Mxd4	5	34331227	34345064	-	13838	0.114161	6.8395	2.83987	0.0130431	0.709731	-2.85515
ENSMUSG00000024120	Lrpprc	17	85012675	85098217	-	85543	-0.15362	6.5681	-2.83963	0.0130493	0.709731	-2.8535
ENSMUSG00000033446	Lpar6	14	73475335	73480734	+	5400	0.287544	1.99688	2.83773	0.0130985	0.709731	-3.68222
ENSMUSG00000019890	Nts	10	102317617	102326347	-	8731	-0.460241	4.51604	-2.83563	0.013153	0.709731	-3.01035
ENSMUSG00000025318	Jph3	8	122456362	122521015	+	64654	0.162708	8.34906	2.83548	0.0131569	0.709731	-2.89622
ENSMUSG00000024451	Arap3	18	38105681	38132022	-	26342	0.193162	3.94801	2.8349	0.0131718	0.709731	-3.13236
ENSMUSG00000022075	Rhobtb2	14	70022439	70043085	-	20647	0.212948	7.39921	2.83486	0.013173	0.709731	-2.87224
ENSMUSG00000102861	Gm37637	9	98472548	98473803	+	1256	-0.471248	-0.285402	-2.83015	0.013296	0.709731	-4.17489
ENSMUSG00000004609	Cd33	7	43173640	43193852	-	20213	0.206758	3.57605	2.82535	0.0134227	0.709731	-3.23882
ENSMUSG00000079018	Ly6c1	15	74915867	74920679	-	4813	0.254637	5.18728	2.8249	0.0134347	0.709731	-2.93498
ENSMUSG00000027400	Pdyn	2	129528485	129541764	-	13280	-0.233052	8.48731	-2.82419	0.0134537	0.709731	-2.9142
ENSMUSG00000005370	Msh6	17	88282490	88298320	+	15831	-0.200679	4.53958	-2.82073	0.0135457	0.709731	-3.0212
ENSMUSG00000062296	Trank1	9	111140807	111224843	+	84037	0.213567	9.8671	2.82011	0.0135623	0.709731	-2.96479
ENSMUSG00000025980	Hspd1	1	55116994	55127402	-	10409	-0.163899	7.45266	-2.81991	0.0135678	0.709731	-2.89256
ENSMUSG00000009555	Cdk9	2	32595796	32603088	-	7293	0.129607	6.49843	2.80861	0.0138737	0.709731	-2.89486
ENSMUSG00000025321	Itgb8	12	119121757	119202537	-	80781	-0.226792	5.51021	-2.80253	0.0140412	0.709731	-2.93514
ENSMUSG00000029309	Sparcl1	5	104226977	104261599	-	34623	-0.170371	10.4539	-2.79857	0.0141513	0.709731	-3.01091
ENSMUSG00000036620	Mgat4b	11	50101717	50125930	+	24214	0.14677	6.4649	2.79672	0.0142032	0.709731	-2.91067
ENSMUSG00000035355	Kcnh4	11	100631202	100650768	-	19567	0.362168	5.56196	2.79403	0.0142786	0.709731	-2.94477
ENSMUSG00000076432	Ywhaq	12	21440072	21467638	-	27567	-0.129931	7.88353	-2.79161	0.0143469	0.709731	-2.93961
ENSMUSG00000104113	Gm37292	7	30907782	30908539	+	758	0.529169	-0.0597953	2.78903	0.0144203	0.709731	-4.15441
ENSMUSG00000058740	Kcnt1	2	25753746	25808285	+	54540	0.241918	8.04854	2.78779	0.0144554	0.709731	-2.94853
ENSMUSG00000037126	Psd	19	46300526	46315595	-	15070	0.166976	9.42711	2.78683	0.0144827	0.709731	-2.9899
ENSMUSG00000024269	Tpgs2	18	25260280	25302064	-	41785	-0.117438	5.90129	-2.78657	0.0144903	0.709731	-2.93501
ENSMUSG00000045983	Eif4g1	16	20487063	20511634	+	24572	-0.111848	8.14563	-2.78624	0.0144997	0.709731	-2.95295
ENSMUSG00000049044	Rapgef4	2	71811584	72087818	+	276235	0.251997	8.96549	2.78581	0.0145121	0.709731	-2.97639
ENSMUSG00000024217	Snrpc	17	28057124	28070942	+	13819	-0.154553	4.31791	-2.78525	0.0145281	0.709731	-3.10082
ENSMUSG00000070880	Gad1	2	70383416	70432358	+	48943	-0.171149	9.51017	-2.77758	0.0147493	0.709731	-3.00382
ENSMUSG00000079056	Kcnip3	2	127298418	127364014	-	65597	0.25227	7.09427	2.77712	0.0147627	0.709731	-2.94094
ENSMUSG00000006435	Neurl1a	19	47167259	47247880	+	80622	0.149752	8.18433	2.77688	0.0147699	0.709731	-2.96574
ENSMUSG00000051517	Arhgef39	4	43496142	43499695	-	3554	0.62521	1.54543	2.77378	0.0148601	0.709731	-3.84063
ENSMUSG00000007739	Cct4	11	22940519	22953780	+	13262	-0.12733	6.75819	-2.77258	0.0148952	0.709731	-2.94185
ENSMUSG00000070802	Pnmal2	7	16678607	16682753	+	4147	-0.239433	9.32415	-2.77045	0.014958	0.709731	-3.00641
ENSMUSG00000025066	Sfr1	19	47720121	47724027	+	3907	-0.108626	6.10393	-2.76961	0.0149827	0.709731	-2.95063
ENSMUSG00000027244	Atg13	2	91504963	91540921	-	35959	0.0952757	6.94824	2.76546	0.0151058	0.709731	-2.95351
ENSMUSG00000033910	Gucy1a1	3	81999734	82053096	-	53363	-0.278136	7.90166	-2.76267	0.015189	0.709731	-2.97694
ENSMUSG00000108231	Gm4045	6	66723001	66723310	+	310	-0.611037	-1.16987	-2.76102	0.0152385	0.709731	-4.29528
ENSMUSG00000052459	Atp6v1a	16	43905765	43960068	-	54304	-0.166452	8.59718	-2.76078	0.0152457	0.709731	-2.99656
ENSMUSG00000056050	Mia3	1	183107682	183150894	-	43213	-0.142191	6.98278	-2.75968	0.0152786	0.709731	-2.96109
ENSMUSG00000021270	Hsp90aa1	12	110657039	110669162	-	12124	-0.230321	9.3459	-2.74795	0.0156354	0.709731	-3.03452
ENSMUSG00000026587	Astn1	1	158189843	158519351	+	329509	-0.140686	8.33277	-2.74746	0.0156507	0.709731	-3.00648
ENSMUSG00000025422	Agap2	10	126911153	126929038	+	17886	0.147173	10.4203	2.73263	0.016114	0.709731	-3.08717
ENSMUSG00000039458	Mtmr12	15	12205114	12274582	+	69469	0.160709	5.33354	2.73104	0.0161643	0.709731	-3.03777
ENSMUSG00000036478	Btg1	10	96452868	96458671	+	5804	-0.190576	5.50429	-2.72661	0.0163056	0.709731	-3.03117
ENSMUSG00000034263	Ints14	9	64868187	64894260	+	26074	-0.125095	4.78181	-2.72331	0.0164117	0.709731	-3.09858
ENSMUSG00000097649	Gm10561	1	55265410	55274781	+	9372	-0.300404	3.04748	-2.72036	0.0165071	0.709731	-3.47137
ENSMUSG00000029344	Tpst2	5	112424557	112463227	+	38671	0.179676	4.70515	2.71881	0.0165576	0.709731	-3.11554
ENSMUSG00000085030	2810455O05Rik	8	124565292	124567524	-	2233	0.243884	3.8318	2.71451	0.0166979	0.709731	-3.27993
ENSMUSG00000031391	L1cam	X	72897384	72939711	-	42328	-0.152369	7.83244	-2.71258	0.0167615	0.709731	-3.0391
ENSMUSG00000035781	R3hdm4	10	79745886	79757042	-	11157	0.12199	8.09171	2.71142	0.0167998	0.709731	-3.0463
ENSMUSG00000007589	Tinf2	14	55912146	55919277	-	7132	0.143371	3.73273	2.70763	0.0169251	0.709731	-3.30876
ENSMUSG00000025047	Pdcd11	19	47079207	47120304	+	41098	-0.133633	4.94056	-2.70727	0.016937	0.709731	-3.09994
ENSMUSG00000078619	Smarcd2	11	106154005	106163798	-	9794	0.149341	3.99045	2.70716	0.0169409	0.709731	-3.25118
ENSMUSG00000092274	Neat1	19	5874736	5895506	-	20771	0.323648	6.13904	2.70367	0.0170572	0.709731	-3.0372
ENSMUSG00000036568	Bicral	17	47109046	47169408	-	60363	0.153724	6.66925	2.70213	0.0171089	0.709731	-3.03397
ENSMUSG00000024975	Pdcd4	19	53880662	53918291	+	37630	-0.148422	6.09973	-2.70015	0.0171754	0.709731	-3.04083
ENSMUSG00000060012	Kif13b	14	64884714	65047066	+	162353	0.14105	6.40024	2.69906	0.0172122	0.709731	-3.03852
ENSMUSG00000046550	Spin2c	X	152615221	152617239	+	2019	-0.277774	1.8571	-2.69858	0.0172284	0.709731	-3.79317
ENSMUSG00000032089	Il10ra	9	45165135	45180447	-	15313	0.171639	3.37303	2.69389	0.017388	0.709731	-3.41002
ENSMUSG00000055200	Sertad3	7	27173193	27176789	+	3597	-0.301453	1.45855	-2.69341	0.0174043	0.709731	-3.89182
ENSMUSG00000001156	Mxd1	6	86624024	86646143	-	22120	0.249616	5.4045	2.6931	0.0174149	0.709731	-3.08062
ENSMUSG00000034667	Xpot	10	121423285	121462237	-	38953	-0.108819	6.78997	-2.69107	0.0174843	0.709731	-3.04844
ENSMUSG00000108616	Gm35040	7	79185791	79209781	+	23991	0.226856	5.1133	2.69064	0.017499	0.709731	-3.10543
ENSMUSG00000020114	Cand1	10	119035160	119075960	-	40801	-0.127788	7.26036	-2.68828	0.0175802	0.709731	-3.05839
ENSMUSG00000068856	Sf3b4	3	96079648	96084880	+	5233	-0.124792	5.19166	-2.68699	0.0176249	0.709731	-3.10211
ENSMUSG00000043857	Mgat5b	11	116809689	116877774	+	68086	0.219864	7.1459	2.68609	0.0176559	0.709731	-3.05973
ENSMUSG00000031422	Morf4l2	X	135633691	135644439	-	10749	-0.1273	7.57501	-2.6857	0.0176694	0.709731	-3.06792
ENSMUSG00000044149	Nkrf	X	36151193	36167166	-	15974	-0.186374	4.57607	-2.68448	0.0177118	0.709731	-3.17027
ENSMUSG00000052040	Klf13	7	63536099	63588663	-	52565	0.158036	7.28625	2.68132	0.0178217	0.709731	-3.06811
ENSMUSG00000013033	Adgrl1	8	84626734	84668583	+	41850	0.138324	9.32269	2.68092	0.0178357	0.709731	-3.11551
ENSMUSG00000030469	Zfp719	7	43229034	43242659	+	13626	-0.190925	3.9339	-2.67862	0.0179165	0.709731	-3.2909
ENSMUSG00000025666	Tmem47	X	80114304	80141478	+	27175	-0.204776	6.60194	-2.67659	0.0179878	0.709731	-3.06653
ENSMUSG00000027296	Itpka	2	119572818	119581744	+	8927	0.214497	7.60935	2.67631	0.0179978	0.709731	-3.08071
ENSMUSG00000039485	Tspyl4	10	34173438	34177316	+	3879	-0.12988	9.13945	-2.66578	0.0183729	0.709731	-3.12884
ENSMUSG00000048371	Pdp2	8	105318083	105325658	+	7576	-0.17522	3.37625	-2.66543	0.0183854	0.709731	-3.43245
ENSMUSG00000060373	Hnrnpc	14	52310834	52341485	-	30652	-0.155893	7.64544	-2.66429	0.0184266	0.709731	-3.09675
ENSMUSG00000050271	Prag1	8	36561982	36614941	+	52960	-0.170154	5.0461	-2.66363	0.0184503	0.709731	-3.14249
ENSMUSG00000043463	Rab9b	X	135758896	135769504	-	10609	-0.24326	5.52994	-2.65781	0.0186619	0.709731	-3.11638
ENSMUSG00000019558	Slc6a8	X	72716756	72726108	+	9353	0.105682	6.77383	2.65753	0.0186722	0.709731	-3.0924
ENSMUSG00000048834	Vstm2a	11	16207724	16377310	+	169587	-0.220931	6.50783	-2.65725	0.0186825	0.709731	-3.09181
ENSMUSG00000002812	Flii	11	60604949	60618089	-	13141	-0.176521	5.88751	-2.65492	0.0187677	0.709731	-3.10492
ENSMUSG00000019868	Vta1	10	14530499	14581304	-	50806	-0.100249	5.81448	-2.65315	0.018833	0.709731	-3.10968
ENSMUSG00000031066	Usp11	X	20570145	20586778	+	16634	-0.159553	7.84806	-2.653	0.0188385	0.709731	-3.11521
ENSMUSG00000063659	Zbtb18	1	177269917	177278330	+	8414	0.211965	6.49686	2.65174	0.0188849	0.709731	-3.09982
ENSMUSG00000041000	Trim62	4	128777373	128805121	+	27749	-0.248049	5.66918	-2.65074	0.0189219	0.709731	-3.11852
ENSMUSG00000042388	Dlgap3	4	127062997	127130815	+	67819	0.26594	8.8348	2.6507	0.0189234	0.709731	-3.13964
ENSMUSG00000031065	Cdk16	X	20554193	20566119	+	11927	0.167391	7.57323	2.64916	0.0189806	0.709731	-3.11473
ENSMUSG00000015981	Stk32c	7	138683554	138793223	-	109670	0.237271	7.58144	2.64841	0.0190085	0.709731	-3.11586
ENSMUSG00000023951	Vegfa	17	46327919	46343295	-	15377	0.16524	6.52169	2.64254	0.0192279	0.709731	-3.11153
ENSMUSG00000027429	Sec23b	2	144398149	144432669	+	34521	-0.115065	5.5071	-2.64219	0.0192411	0.709731	-3.13716
ENSMUSG00000023915	Tnfrsf21	17	43327446	43400080	+	72635	-0.26311	6.08871	-2.64141	0.0192703	0.709731	-3.11711
ENSMUSG00000073838	Tufm	7	126086533	126089903	+	3371	-0.162718	5.67879	-2.64005	0.0193218	0.709731	-3.13164
ENSMUSG00000035835	Plppr3	10	79696309	79710468	-	14160	-0.169026	6.73626	-2.63985	0.0193295	0.709731	-3.11475
ENSMUSG00000073367	Gm10493	17	90762317	90762926	+	610	-0.61846	-1.1779	-2.63964	0.0193373	0.709731	-4.31819
ENSMUSG00000000148	Brat1	5	140690766	140705134	+	14369	0.126814	4.94118	2.63847	0.0193815	0.709731	-3.18301
ENSMUSG00000021913	Ogdhl	14	32043976	32070108	+	26133	-0.103589	7.12566	-2.63725	0.0194277	0.709731	-3.12212
ENSMUSG00000039787	Cercam	2	29759176	29772852	+	13677	0.252612	3.38685	2.63499	0.0195137	0.709731	-3.45895
ENSMUSG00000085151	1110018N20Rik	2	167030622	167034728	+	4107	0.220693	3.57336	2.63283	0.0195965	0.709731	-3.4166
ENSMUSG00000097545	Mir124a-1hg	14	64824780	64831410	+	6631	0.218059	7.10389	2.62699	0.0198213	0.709731	-3.13554
ENSMUSG00000035929	H2-Q4	17	35598593	35604266	+	5674	0.463298	2.45275	2.62684	0.0198271	0.709731	-3.69568
ENSMUSG00000031934	Panx1	9	14913424	14956774	-	43351	-0.145276	4.93916	-2.62174	0.0200257	0.709731	-3.20217
ENSMUSG00000070476	Fam217b	2	178056317	178066221	+	9905	0.0986967	5.94509	2.62147	0.0200363	0.709731	-3.14666
ENSMUSG00000110710	C78859	8	95048786	95054728	+	5943	0.273534	6.05493	2.61935	0.0201194	0.709731	-3.1475
ENSMUSG00000021794	Glud1	14	34032684	34067222	+	34539	-0.0981198	8.23166	-2.61933	0.0201201	0.709731	-3.16528
ENSMUSG00000035049	Rrp12	19	41851290	41884612	-	33323	-0.120275	5.42304	-2.61824	0.0201631	0.709731	-3.17171
ENSMUSG00000002396	Ocel1	8	71823942	71832005	+	8064	0.134979	4.60031	2.61719	0.0202044	0.709731	-3.24513
ENSMUSG00000022253	Nadk2	15	9071340	9110979	+	39640	-0.134427	5.30433	-2.61357	0.0203479	0.709731	-3.18453
ENSMUSG00000008153	Clstn3	6	124407540	124441753	-	34214	-0.128923	8.58585	-2.61223	0.0204011	0.709731	-3.18137
ENSMUSG00000021182	Ccdc88c	12	100877782	100995315	-	117534	0.336496	7.0625	2.60966	0.0205035	0.709731	-3.15771
ENSMUSG00000030123	Plxnd1	6	115931772	115971966	-	40195	0.342235	7.27728	2.60961	0.0205058	0.709731	-3.1606
ENSMUSG00000046402	Rbp1	9	98305014	98328628	+	23615	-0.251903	4.73404	-2.60779	0.0205786	0.709731	-3.23902
ENSMUSG00000024271	Elp2	18	24735923	24772564	+	36642	-0.129804	6.69275	-2.607	0.0206104	0.709731	-3.15725
ENSMUSG00000029471	Camkk2	5	122869233	122917472	-	48240	0.222412	7.81796	2.60534	0.020677	0.709731	-3.17509
ENSMUSG00000061353	Cxcl12	6	117145496	117158328	+	12833	0.319166	6.45995	2.6053	0.020679	0.709731	-3.16073
ENSMUSG00000027303	Ptpra	2	130292198	130398044	+	105847	-0.1008	7.67383	-2.60292	0.020775	0.709731	-3.17556
ENSMUSG00000034024	Cct2	10	116886906	116899719	-	12814	-0.10213	7.20624	-2.60002	0.0208928	0.709731	-3.17135
ENSMUSG00000028843	Sh3bgrl3	4	133854717	133856100	-	1384	0.178669	6.71037	2.59894	0.0209371	0.709731	-3.16837
ENSMUSG00000065954	Tacc1	8	25644568	25746604	-	102037	0.145029	8.07554	2.59835	0.020961	0.709731	-3.18868
ENSMUSG00000020331	Hcn2	10	79552468	79571942	+	19475	0.156167	7.19669	2.59553	0.0210768	0.709731	-3.17725
ENSMUSG00000041757	Plekha6	1	133091948	133231173	+	139226	0.157988	7.37573	2.59422	0.0211305	0.709731	-3.18163
ENSMUSG00000020142	Slc1a4	11	20252180	20282713	-	30534	-0.1604	6.46385	-2.59191	0.0212258	0.709731	-3.1769
ENSMUSG00000037972	Snn	16	10878809	10892849	+	14041	0.165585	8.37162	2.58748	0.02141	0.709731	-3.20792
ENSMUSG00000076617	Ighm	12	113382178	113386350	-	4173	0.36335	3.8462	2.58237	0.0216243	0.709731	-3.40867
ENSMUSG00000020205	Phlda1	10	111342147	111344506	+	2360	-0.202772	4.7709	-2.57716	0.0218446	0.709731	-3.2707
ENSMUSG00000063235	Ptpmt1	2	90739060	90748389	-	9330	0.126643	4.96411	2.57453	0.0219567	0.709731	-3.25722
ENSMUSG00000058498	Rnf207	4	152391476	152403450	-	11975	0.370998	4.12555	2.57445	0.0219605	0.709731	-3.3647
ENSMUSG00000060098	Prmt7	8	106937568	106979426	+	41859	-0.146033	5.41336	-2.57423	0.0219699	0.709731	-3.22703
ENSMUSG00000085042	Abhd11os	5	135040968	135042107	-	1140	0.582854	2.40704	2.57266	0.0220368	0.709731	-3.74515
ENSMUSG00000024330	Col11a2	17	34258411	34285659	+	27249	0.237137	4.85464	2.5717	0.0220782	0.709731	-3.27111
ENSMUSG00000006930	Hap1	11	100238153	100246954	-	8802	-0.37492	8.66486	-2.57153	0.0220855	0.709731	-3.2335
ENSMUSG00000029405	G3bp2	5	92200005	92231578	-	31574	-0.153714	8.27638	-2.56992	0.0221546	0.709731	-3.22804
ENSMUSG00000078958	Atp6ap1l	13	91031552	91053474	-	21923	0.515204	3.25796	2.56936	0.0221791	0.709731	-3.54909
ENSMUSG00000090946	Ccdc71l	12	32428703	32432942	+	4240	-0.150221	3.6304	-2.56931	0.0221813	0.709731	-3.46126
ENSMUSG00000084790	Gm15879	16	3850703	3855711	-	5009	-0.198075	3.58442	-2.56535	0.0223526	0.709731	-3.4747
ENSMUSG00000030447	Cyfip1	7	55491493	55582350	+	90858	-0.123214	6.55533	-2.5616	0.0225163	0.709731	-3.21599
ENSMUSG00000025266	Gnl3l	X	149766137	149800318	-	34182	-0.125181	7.82446	-2.56063	0.0225587	0.709731	-3.23186
ENSMUSG00000031960	Aars	8	111759776	111784296	+	24521	-0.137228	7.30713	-2.56024	0.022576	0.709731	-3.22396
ENSMUSG00000074785	Plxnc1	10	94626728	94780697	-	153970	-0.322748	6.24477	-2.55806	0.0226719	0.709731	-3.2224
ENSMUSG00000024423	Impact	18	13088909	13126007	+	37099	-0.141163	8.15065	-2.55685	0.0227253	0.709731	-3.24219
ENSMUSG00000035262	Amh	10	80641077	80643482	+	2406	0.403624	0.462171	2.55366	0.0228666	0.709731	-4.143
ENSMUSG00000041571	Selenow	7	15651133	15656327	-	5195	0.199098	9.04178	2.55331	0.0228822	0.709731	-3.26407
ENSMUSG00000016664	Pacsin2	15	83259808	83348807	-	89000	-0.150663	6.44984	-2.5529	0.0229004	0.709731	-3.22751
ENSMUSG00000019986	Ahi1	10	20828446	20956328	+	127883	-0.234218	8.82055	-2.55171	0.0229537	0.709731	-3.26118
ENSMUSG00000042419	Nfkbil1	17	35439151	35454768	-	15618	0.186623	3.70315	2.5517	0.0229539	0.709731	-3.46428
ENSMUSG00000086098	Gm14291	2	167043496	167044719	+	1224	0.299218	0.655337	2.55101	0.022985	0.709731	-4.11195
ENSMUSG00000022389	Tef	15	81686622	81711064	+	24443	0.168686	9.53982	2.5502	0.0230209	0.709731	-3.27927
ENSMUSG00000030237	Slco1a4	6	141751166	141801925	-	50760	0.2351	6.21322	2.54891	0.023079	0.709731	-3.23537
ENSMUSG00000019874	Fabp7	10	57660977	57664546	+	3570	-0.583641	3.7374	-2.54801	0.023119	0.709731	-3.4626
ENSMUSG00000038079	Tmem237	1	59139749	59159567	-	19819	-0.137626	4.14646	-2.54792	0.0231233	0.709731	-3.3855
ENSMUSG00000038976	Ppp1r9b	11	94881861	94897725	+	15865	0.171796	10.2304	2.54696	0.0231663	0.709731	-3.2998
ENSMUSG00000041920	Slc16a6	11	109341681	109364424	-	22744	0.331139	4.64466	2.54588	0.0232149	0.709731	-3.32339
ENSMUSG00000033256	Shf	2	122179373	122199643	-	20271	0.173138	5.25942	2.54481	0.0232633	0.709731	-3.27252
ENSMUSG00000058672	Tubb2a	13	34258257	34261990	-	3734	-0.255961	8.03653	-2.54255	0.0233656	0.709731	-3.25822
ENSMUSG00000039656	Rxrb	17	34250786	34257373	+	6588	0.124361	6.4139	2.54182	0.0233988	0.709731	-3.24239
ENSMUSG00000074896	Ifit3	19	34560931	34566131	+	5201	0.38886	3.22932	2.53844	0.0235527	0.709731	-3.57871
ENSMUSG00000101225	1700008J07Rik	7	127109610	127112041	-	2432	-0.324294	1.18705	-2.53688	0.0236245	0.709731	-4.02031
ENSMUSG00000031246	Sh3bgrl	X	108138971	108241479	+	102509	-0.233868	5.79094	-2.53654	0.0236401	0.709731	-3.25907
ENSMUSG00000022416	Cacna1i	15	80171439	80282480	+	111042	0.17689	7.27495	2.53433	0.0237416	0.709731	-3.25692
ENSMUSG00000054604	Cggbp1	16	64672359	64679870	+	7512	-0.134955	5.66401	-2.53424	0.0237456	0.709731	-3.26609
ENSMUSG00000048796	Cyb561d1	3	108103003	108108528	-	5526	0.119477	4.96151	2.53339	0.0237851	0.709731	-3.30632
ENSMUSG00000031666	Rbl2	8	91796685	91850472	+	53788	-0.0945025	6.10569	-2.53181	0.0238579	0.70979	-3.25804
ENSMUSG00000028945	Rheb	5	25007821	25047622	-	39802	-0.140943	6.21929	-2.52571	0.0241421	0.713017	-3.26436
ENSMUSG00000020658	Efr3b	12	4012554	4088915	-	76362	0.122897	8.17367	2.52065	0.0243803	0.713017	-3.28788
ENSMUSG00000068854	H2bc21	3	96128435	96131054	+	2620	-0.242587	3.15277	-2.51942	0.0244386	0.713017	-3.60838
ENSMUSG00000022661	Cd200	16	45202498	45229416	-	26919	-0.208238	6.41865	-2.51773	0.0245184	0.713017	-3.27309
ENSMUSG00000115099	1700087I21Rik	14	103662341	103687303	+	24963	0.287816	4.65023	2.51659	0.0245728	0.713017	-3.35551
ENSMUSG00000003352	Cacnb3	15	98528721	98542410	+	13690	0.190747	7.57771	2.51602	0.0246001	0.713017	-3.2845
ENSMUSG00000020785	Camkk1	11	72909834	72932899	+	23066	0.240935	7.26265	2.51297	0.024746	0.713017	-3.28416
ENSMUSG00000040025	Ythdf2	4	131912223	131939614	-	27392	-0.134617	5.15588	-2.51173	0.0248053	0.713017	-3.31828
ENSMUSG00000079657	Rab26	17	24746215	24753184	-	6970	0.246341	4.98083	2.51073	0.0248532	0.713017	-3.33273
ENSMUSG00000031111	Igsf1	X	48871413	48886626	-	15214	-1.04388	2.72447	-2.51031	0.0248737	0.713017	-3.71807
ENSMUSG00000057342	Sphk2	7	45358891	45367426	-	8536	-0.18729	4.82762	-2.51007	0.0248852	0.713017	-3.34386
ENSMUSG00000025738	Fbxl16	17	26028059	26040229	+	12171	0.226423	11.0422	2.5087	0.0249514	0.713017	-3.36425
ENSMUSG00000029430	Ran	5	129097133	129101387	+	4255	-0.0982205	7.29971	-2.50603	0.0250808	0.713017	-3.29323
ENSMUSG00000021756	Il6st	13	112600604	112646620	+	46017	-0.118938	6.70732	-2.50459	0.0251507	0.713017	-3.28984
ENSMUSG00000030735	Gm9755	8	67966887	67968242	-	1356	-0.314888	1.76063	-2.50254	0.0252506	0.713017	-3.92057
ENSMUSG00000031007	Atp6ap2	X	12454040	12483288	+	29249	-0.181286	7.83543	-2.502	0.0252773	0.713017	-3.30605
ENSMUSG00000022234	Cct5	15	31590946	31601950	-	11005	-0.117597	7.27284	-2.50091	0.0253308	0.713017	-3.29942
ENSMUSG00000005514	Por	5	135698887	135764180	+	65294	-0.136356	6.66007	-2.49754	0.0254966	0.713017	-3.29881
ENSMUSG00000097415	AU020206	7	75418786	75431847	-	13062	0.253544	2.96782	2.49735	0.0255057	0.713017	-3.66745
ENSMUSG00000034570	Inpp5j	11	3444375	3454821	-	10447	0.185916	6.31874	2.49148	0.0257971	0.713017	-3.30799
ENSMUSG00000022442	Ttll1	15	83367970	83395094	-	27125	-0.12881	5.68293	-2.49023	0.0258595	0.713017	-3.3209
ENSMUSG00000097885	5031434O11Rik	3	51467456	51474538	+	7083	0.158543	3.0143	2.48986	0.025878	0.713017	-3.66268
ENSMUSG00000055733	Nap1l3	X	121304262	121307098	-	2837	-0.202249	5.44095	-2.48975	0.0258835	0.713017	-3.33056
ENSMUSG00000025212	Sfxn3	19	45035942	45044822	+	8881	0.138005	7.2083	2.48922	0.0259103	0.713017	-3.31375
ENSMUSG00000010025	Aldh3a2	11	61114243	61158290	-	44048	-0.117556	6.02517	-2.48818	0.0259622	0.713017	-3.31525
ENSMUSG00000021943	Gdf10	14	33645544	33659940	+	14397	0.463834	3.06616	2.48796	0.0259736	0.713017	-3.65633
ENSMUSG00000034621	Gpatch8	11	102366741	102447218	-	80478	0.211922	6.93755	2.48463	0.026141	0.713017	-3.31722
ENSMUSG00000020988	L2hgdh	12	69737207	69771647	-	34441	-0.134107	4.4455	-2.48456	0.0261447	0.713017	-3.41164
ENSMUSG00000015950	Ncf1	5	134248907	134258479	-	9573	0.17403	3.0692	2.48347	0.0262001	0.713017	-3.65626
ENSMUSG00000032279	Idh3a	9	54493618	54511945	+	18328	-0.0947205	7.49399	-2.48134	0.0263078	0.713017	-3.32726
ENSMUSG00000001924	Uba1	X	20524565	20549418	+	24854	-0.122804	8.60123	-2.4786	0.0264476	0.713017	-3.34704
ENSMUSG00000039367	Sec24c	14	20724376	20744920	+	20545	-0.0986362	6.6237	-2.47456	0.0266546	0.713017	-3.32838
ENSMUSG00000030376	Slc8a2	7	15863751	15894988	+	31238	0.174669	8.51539	2.47363	0.0267027	0.713017	-3.35184
ENSMUSG00000037275	Gemin5	11	58010828	58059365	-	48538	-0.115805	5.35534	-2.47284	0.0267437	0.713017	-3.35521
ENSMUSG00000024241	Sos1	17	80701180	80787882	-	86703	-0.124576	5.82724	-2.47253	0.0267598	0.713017	-3.33923
ENSMUSG00000015656	Hspa8	9	40712280	40721383	+	9104	-0.212603	10.2866	-2.47237	0.0267679	0.713017	-3.38838
ENSMUSG00000054814	Usp46	5	74159114	74229092	-	69979	-0.165604	6.72545	-2.47074	0.0268523	0.713017	-3.33348
ENSMUSG00000038387	Rras	7	44667385	44671071	+	3687	0.2861	3.04065	2.46957	0.0269132	0.713017	-3.67449
ENSMUSG00000020700	Map3k3	11	105975439	106046272	+	70834	0.131877	5.54073	2.46709	0.0270424	0.713017	-3.35512
ENSMUSG00000043909	Trp53bp1	2	121023762	121101888	-	78127	-0.139817	7.43058	-2.46577	0.0271113	0.713017	-3.34617
ENSMUSG00000040018	Cox15	19	43721693	43741439	-	19747	-0.0969103	5.22398	-2.46523	0.0271395	0.713017	-3.37091
ENSMUSG00000020653	Klf11	12	24701273	24712788	+	11516	0.211631	3.09662	2.46286	0.0272639	0.713017	-3.66735
ENSMUSG00000029544	Cabp1	5	115306748	115332440	-	25693	0.314223	6.24659	2.46027	0.0274007	0.713017	-3.34905
ENSMUSG00000030884	Uqcrc2	7	120234399	120258747	+	24349	-0.10898	7.80556	-2.46011	0.0274089	0.713017	-3.3583
ENSMUSG00000048814	Lonrf2	1	38832726	38875792	-	43067	-0.128529	7.90238	-2.45955	0.0274385	0.713017	-3.36033
ENSMUSG00000049100	Pcdh10	3	45332833	45390058	+	57226	-0.178083	8.08606	-2.45793	0.0275247	0.713017	-3.3649
ENSMUSG00000086925	Gm6286	1	166773166	166773927	-	762	-0.445197	-0.981556	-2.45527	0.0276659	0.713017	-4.33533
ENSMUSG00000025272	Tro	X	149428300	149440579	-	12280	-0.165235	8.27969	-2.45518	0.0276708	0.713017	-3.37103
ENSMUSG00000006235	Epor	9	21870193	21874802	-	4610	0.291975	4.09286	2.45337	0.0277677	0.713017	-3.49457
ENSMUSG00000025745	Hadha	5	30323302	30360160	-	36859	-0.108614	6.35102	-2.4533	0.0277714	0.713017	-3.35634
ENSMUSG00000042487	Leo1	9	75348806	75373714	+	24909	-0.159438	4.70399	-2.45104	0.0278929	0.713017	-3.42292
ENSMUSG00000000876	Pxmp4	2	154427678	154445628	-	17951	0.134753	4.27731	2.45073	0.0279095	0.713017	-3.47033
ENSMUSG00000079557	Marchf2	17	33904666	33937644	-	32979	0.104982	6.26202	2.45024	0.0279355	0.713017	-3.36116
ENSMUSG00000030104	Edem1	6	108805602	108836317	+	30716	0.125929	4.6156	2.44973	0.027963	0.713017	-3.43347
ENSMUSG00000117172	A230051N06Rik	17	56548716	56549805	+	1090	0.40057	-0.0676528	2.44834	0.0280379	0.713017	-4.24599
ENSMUSG00000027203	Dut	2	125089110	125100528	+	11419	0.110458	4.64955	2.44578	0.0281766	0.713017	-3.4347
ENSMUSG00000031754	Nudt21	8	94742124	94763659	-	21536	-0.123956	5.79134	-2.44563	0.0281847	0.713017	-3.37406
ENSMUSG00000055053	Nfic	10	81232020	81291469	-	59450	0.180666	6.44678	2.44494	0.0282222	0.713017	-3.36704
ENSMUSG00000044288	Cnr1	4	33924593	33948831	+	24239	0.400514	6.74166	2.44221	0.0283711	0.713017	-3.37112
ENSMUSG00000044365	Cxxc4	3	133942245	133967922	+	25678	-0.236478	5.04995	-2.44184	0.0283915	0.713017	-3.40874
ENSMUSG00000031785	Adgrg1	8	95701379	95740845	+	39467	-0.269196	6.70851	-2.43953	0.0285179	0.713017	-3.37348
ENSMUSG00000041992	Rapgef5	12	117480099	117723472	+	243374	-0.14443	7.3067	-2.43886	0.028555	0.713017	-3.37885
ENSMUSG00000071650	Ganab	19	8875435	8894036	+	18602	-0.0899175	7.31325	-2.43875	0.0285608	0.713017	-3.37907
ENSMUSG00000037428	Vgf	5	137055246	137062205	+	6960	-0.193265	7.64	-2.43748	0.0286307	0.713017	-3.38459
ENSMUSG00000062444	Ap3b2	7	81110147	81143673	-	33527	-0.129737	7.26552	-2.43698	0.0286583	0.713017	-3.38078
ENSMUSG00000048970	C1galt1c1	X	37719662	37723964	-	4303	-0.205053	4.2204	-2.43461	0.0287893	0.713017	-3.49426
ENSMUSG00000005103	Wdr1	5	38684156	38720564	-	36409	-0.163448	6.92802	-2.43406	0.0288199	0.713017	-3.38151
ENSMUSG00000071847	Apcdd1	18	63055302	63094250	+	38949	0.244297	4.96546	2.43321	0.0288673	0.713017	-3.42545
ENSMUSG00000113473	Gm7045	13	62818113	62818717	-	605	0.723753	-1.92371	2.43132	0.0289723	0.713017	-4.40844
ENSMUSG00000030048	Gkn3	6	87360238	87365917	-	5680	0.486803	2.58022	2.43003	0.0290444	0.713017	-3.80037
ENSMUSG00000004099	Dnmt1	9	20818505	20871184	-	52680	-0.127182	6.05913	-2.42908	0.0290978	0.713017	-3.39007
ENSMUSG00000059824	Dbp	7	45354512	45359627	+	5116	0.309507	7.40891	2.42826	0.0291437	0.713017	-3.39363
ENSMUSG00000043388	Tmem130	5	144672725	144698628	-	25904	-0.316071	8.10898	-2.42756	0.029183	0.713017	-3.40302
ENSMUSG00000043439	Epop	11	97518215	97520528	-	2314	0.486232	4.16228	2.4262	0.0292594	0.713017	-3.51602
ENSMUSG00000035671	Zswim4	8	84937307	84963684	-	26378	0.126175	5.01744	2.42481	0.0293375	0.713017	-3.43151
ENSMUSG00000049536	Tceal1	X	135608731	135612227	+	3497	-0.196422	4.13788	-2.42139	0.0295313	0.713017	-3.51923
ENSMUSG00000020612	Prkar1a	11	109540231	109560482	+	20252	-0.0900648	9.31553	-2.42031	0.0295924	0.713017	-3.43053
ENSMUSG00000045052	Prlhr	19	60455170	60456742	-	1573	-0.441714	1.50994	-2.42024	0.0295964	0.713017	-4.01294
ENSMUSG00000085882	2610507I01Rik	11	59090662	59093211	-	2550	-0.172991	2.98964	-2.41625	0.0298245	0.713017	-3.72467
ENSMUSG00000029657	Hsph1	5	149537752	149559841	-	22090	-0.230579	8.47857	-2.4162	0.0298273	0.713017	-3.42196
ENSMUSG00000032590	Apeh	9	107962612	107971805	-	9194	-0.114983	4.99026	-2.41544	0.0298709	0.713017	-3.44362
ENSMUSG00000056413	Adap1	5	139257631	139311377	-	53747	0.163231	7.34553	2.41312	0.0300045	0.713017	-3.41202
ENSMUSG00000037224	Zfyve28	5	34352237	34445793	-	93557	0.239488	7.03294	2.4131	0.0300052	0.713017	-3.40937
ENSMUSG00000100755	Rps23-ps1	3	37768889	37769313	+	425	0.534379	-1.14618	2.4113	0.0301095	0.713017	-4.35848
ENSMUSG00000028410	Dnaja1	4	40722150	40737149	+	15000	-0.173327	7.62746	-2.40874	0.0302578	0.713017	-3.42059
ENSMUSG00000031451	Gas6	8	13515374	13544490	-	29117	0.103985	6.62495	2.4087	0.0302602	0.713017	-3.4131
ENSMUSG00000023019	Gpd1	15	99615396	99622886	+	7491	0.213516	6.58967	2.40859	0.0302667	0.713017	-3.41343
ENSMUSG00000058638	Zfp110	7	12568688	12584504	+	15817	-0.147627	4.23291	-2.40791	0.0303061	0.713017	-3.52085
ENSMUSG00000036764	Dnajc12	10	63218222	63246355	+	28134	-0.14676	3.89066	-2.40742	0.0303345	0.713017	-3.56938
ENSMUSG00000052248	Zeb2os	2	45000719	45004099	+	3381	0.317384	1.1245	2.40647	0.0303899	0.713017	-4.08907
ENSMUSG00000024186	Rgs11	17	26421925	26430298	+	8374	0.289893	5.4227	2.40565	0.030438	0.713017	-3.43582
ENSMUSG00000107553	Gm44266	6	138577840	138578339	+	500	0.834809	-1.60757	2.40337	0.0305714	0.714472	-4.39374
ENSMUSG00000081219	Bambi-ps1	2	122297416	122298007	-	592	-0.599995	-0.837437	-2.40039	0.0307469	0.716904	-4.33447
ENSMUSG00000030421	Uri1	7	37659417	37722976	-	63560	0.114621	5.5389	2.39811	0.0308813	0.718366	-3.44068
ENSMUSG00000104415	Gm37069	1	182321721	182325862	+	4142	0.300468	1.76287	2.39161	0.0312691	0.724222	-3.98086
ENSMUSG00000032198	Dock6	9	21711156	21763931	-	52776	0.219677	4.87297	2.39147	0.0312775	0.724222	-3.48034
ENSMUSG00000013523	Bcas1	2	170188911	170269765	-	80855	0.158344	7.24631	2.38736	0.0315249	0.725597	-3.44366
ENSMUSG00000066357	Wdr6	9	108449510	108455938	-	6429	-0.419218	7.76415	-2.3863	0.0315886	0.725597	-3.45026
ENSMUSG00000084792	1700056N10Rik	16	16865384	16866975	+	1592	0.282094	1.3323	2.38581	0.0316187	0.725597	-4.06198
ENSMUSG00000009731	Kcnd1	X	7688528	7704519	+	15992	0.133708	4.53968	2.38531	0.031649	0.725597	-3.51305
ENSMUSG00000024948	Map4k2	19	6391165	6405645	+	14481	0.156719	6.26772	2.38433	0.0317085	0.725597	-3.44531
ENSMUSG00000003526	Prodh	16	17878221	17908067	-	29847	0.139503	5.24477	2.3833	0.0317711	0.725597	-3.46962
ENSMUSG00000033009	Ogfod1	8	94763826	94794549	+	30724	-0.111874	7.09409	-2.37816	0.0320855	0.729568	-3.4539
ENSMUSG00002076683		8	106034424	106034532	-	109	0.583166	-1.13279	2.37773	0.032112	0.729568	-4.36393
ENSMUSG00000048232	Fbxo10	4	45034247	45084604	-	50358	-0.167973	6.25384	-2.37544	0.0322527	0.729568	-3.45635
ENSMUSG00000036698	Ago2	15	72967693	73056784	-	89092	-0.144793	7.49063	-2.37503	0.0322781	0.729568	-3.46144
ENSMUSG00000056367	Actr3b	5	25964995	26055686	+	90692	0.153682	7.01786	2.37453	0.0323088	0.729568	-3.45816
ENSMUSG00000025451	Paip1	13	119565137	119594754	+	29618	-0.136216	5.66572	-2.37318	0.0323926	0.729816	-3.46783
ENSMUSG00000053617	Sh3pxd2a	19	47248613	47452840	-	204228	0.140399	6.73153	2.37165	0.0324874	0.730311	-3.46057
ENSMUSG00000021051	Ppp2r5e	12	75497655	75643019	-	145365	-0.117177	6.49395	-2.36793	0.0327195	0.732716	-3.46495
ENSMUSG00000002109	Ddb2	2	91041917	91067327	-	25411	0.227202	4.23359	2.36606	0.0328371	0.732716	-3.56622
ENSMUSG00000040249	Lrp1	10	127374030	127457017	-	82988	-0.161237	9.36984	-2.3657	0.0328593	0.732716	-3.49672
ENSMUSG00000029910	Mad2l1	6	66512374	66524204	+	11831	-0.177656	3.03098	-2.36527	0.0328867	0.732716	-3.7569
ENSMUSG00000008892	Vdac3	8	23067091	23083829	-	16739	-0.0997839	7.03501	-2.36137	0.0331328	0.736563	-3.47477
ENSMUSG00000033545	Znrf1	8	112262729	112352662	+	89934	0.0862177	7.51251	2.35889	0.0332899	0.738417	-3.48193
ENSMUSG00000043300	B3galnt1	3	69481491	69506293	-	24803	-0.134926	4.95932	-2.35692	0.033416	0.738715	-3.51432
ENSMUSG00000022594	Lynx1	15	74619701	74624895	-	5195	0.244903	8.16274	2.35533	0.0335172	0.738715	-3.49302
ENSMUSG00000039081	Zfp503	14	22034027	22039669	-	5643	-0.209286	4.71227	-2.35388	0.0336102	0.738715	-3.53337
ENSMUSG00000078429	Ctdsp2	10	126814586	126835844	+	21259	0.0906756	7.10123	2.3535	0.0336351	0.738715	-3.4853
ENSMUSG00000005732	Ranbp1	16	18057648	18066596	-	8949	-0.135844	4.15065	-2.35206	0.0337274	0.738715	-3.58961
ENSMUSG00000024892	Pcx	19	4560500	4671780	+	111281	-0.111686	6.67038	-2.35178	0.0337454	0.738715	-3.48548
ENSMUSG00000091037	Gm17661	2	90747987	90748259	+	273	0.555735	-1.97311	2.34679	0.0340687	0.744168	-4.42269
ENSMUSG00000080850	Gm12439	4	48675156	48675520	+	365	0.856765	-2.57605	2.34479	0.0341987	0.744536	-4.44706
ENSMUSG00000062867	Impdh2	9	108437485	108442783	+	5299	-0.11184	5.66825	-2.34425	0.0342341	0.744536	-3.50371
ENSMUSG00000059005	Hnrnpa3	2	75489605	75499751	+	10147	-0.11568	7.69993	-2.33701	0.03471	0.749459	-3.51103
ENSMUSG00000003469	Phyhip	14	70694916	70706272	+	11357	0.173231	9.39384	2.33696	0.0347133	0.749459	-3.53129
ENSMUSG00000049516	Spty2d1	7	46640144	46658159	-	18016	-0.218924	4.53258	-2.33667	0.034733	0.749459	-3.56677
ENSMUSG00000034714	Ttyh2	11	114566257	114611803	+	45547	0.147834	5.68913	2.33402	0.0349087	0.749459	-3.51629
ENSMUSG00000044014	Npy5r	8	67132617	67140780	-	8164	-0.209654	2.8598	-2.33215	0.035033	0.749459	-3.81354
ENSMUSG00000056316	Gm9996	10	29019278	29020190	-	913	0.384003	0.93136	2.33188	0.0350517	0.749459	-4.15039
ENSMUSG00000033436	Armcx2	X	133704894	133709970	-	5077	-0.106979	6.75325	-2.33104	0.0351078	0.749459	-3.51197
ENSMUSG00000019775	Rgs17	10	5775663	5872400	-	96738	-0.19565	6.25965	-2.329	0.0352441	0.749459	-3.51519
ENSMUSG00000024921	Smarca2	19	26582450	26755722	+	173273	-0.106775	7.95554	-2.3288	0.0352578	0.749459	-3.52366
ENSMUSG00000105843	Gm19439	3	87938185	87940457	+	2273	0.372758	2.60748	2.32749	0.0353458	0.749459	-3.86483
ENSMUSG00000100104	Gm5644	X	144384833	144385297	-	465	0.39329	-0.567231	2.32743	0.0353498	0.749459	-4.32735
ENSMUSG00000020850	Prpf8	11	75377642	75400275	+	22634	-0.136964	8.3462	-2.32732	0.0353575	0.749459	-3.52936
ENSMUSG00000050148	Ubqln2	X	152281223	152284566	+	3344	-0.129947	7.79713	-2.32289	0.035657	0.752838	-3.52948
ENSMUSG00000014959	Gorasp2	2	70491920	70542980	+	51061	-0.0792076	6.79575	-2.32151	0.0357507	0.752838	-3.52415
ENSMUSG00000049577	Zfpm1	8	123008880	123063990	+	55111	0.169411	5.00235	2.32118	0.0357733	0.752838	-3.55478
ENSMUSG00000074657	Kif5a	10	127061565	127099217	-	37653	0.2505	11.3799	2.32015	0.0358433	0.752838	-3.58379
ENSMUSG00000037287	Tbcel	9	42323612	42419105	-	95494	0.0790738	5.80533	2.31535	0.036172	0.752838	-3.53721
ENSMUSG00000102234	Gm37885	1	182311744	182320038	+	8295	0.327997	3.61003	2.31498	0.0361978	0.752838	-3.70301
ENSMUSG00000025492	Ifitm3	7	140589499	140590683	-	1185	0.341341	3.12592	2.31151	0.0364378	0.752838	-3.78509
ENSMUSG00000001062	Vps9d1	8	123969095	123981087	-	11993	0.0990378	5.94778	2.3114	0.0364452	0.752838	-3.5402
ENSMUSG00000027263	Tubgcp4	2	121001135	121029251	+	28117	-0.161382	5.06955	-2.31104	0.0364701	0.752838	-3.563
ENSMUSG00000037855	Zfp365	10	67721933	67748492	-	26560	0.213349	9.02602	2.31089	0.0364804	0.752838	-3.55724
ENSMUSG00000038550	Ciart	3	95785815	95789563	-	3749	0.497369	4.28169	2.31007	0.0365375	0.752838	-3.62288
ENSMUSG00000047787	Flrt1	19	7069366	7083094	-	13729	-0.117292	5.31633	-2.30958	0.0365716	0.752838	-3.55559
ENSMUSG00000027580	Helz2	2	180869408	180883820	-	14413	0.219851	3.17005	2.30929	0.0365918	0.752838	-3.77856
ENSMUSG00000064340	mt-Tl1	MT	2676	2750	+	75	0.381591	0.39052	2.30841	0.0366531	0.752838	-4.23224
ENSMUSG00000063796	Slc22a8	19	8568618	8589199	+	20582	0.211214	4.4695	2.30598	0.0368225	0.752838	-3.60718
ENSMUSG00000030327	Necap1	6	122851433	122865900	+	14468	-0.0995865	7.67877	-2.30155	0.0371341	0.752838	-3.55489
ENSMUSG00000046215	Rprml	11	103540396	103541405	+	1010	0.185657	5.36545	2.30152	0.0371357	0.752838	-3.5642
ENSMUSG00000033732	Sf3b3	8	111536871	111573419	-	36549	-0.141524	6.95097	-2.30093	0.0371779	0.752838	-3.55068
ENSMUSG00000042258	Isl1	13	116434817	116446225	-	11409	-0.291075	4.30502	-2.30004	0.0372409	0.752838	-3.62774
ENSMUSG00000022537	Tmem44	16	30330673	30369660	-	38988	0.191443	6.77157	2.29783	0.0373973	0.752838	-3.55425
ENSMUSG00000073676	Hspe1	1	55127291	55130466	+	3176	-0.124775	5.85084	-2.29775	0.0374029	0.752838	-3.55826
ENSMUSG00000000751	Rpa1	11	75188992	75239150	-	50159	-0.0911515	5.84335	-2.29746	0.0374235	0.752838	-3.55874
ENSMUSG00000086600	C030005K06Rik	18	50175797	50186911	-	11115	-0.462613	2.88392	-2.29729	0.0374357	0.752838	-3.83661
ENSMUSG00000032586	Traip	9	107827335	107849469	+	22135	0.313771	6.13128	2.29719	0.0374426	0.752838	-3.55667
ENSMUSG00000020455	Trim11	11	58868919	58882284	+	13366	0.16213	5.81694	2.2963	0.0375062	0.752838	-3.56083
ENSMUSG00000029348	Asphd2	5	112532220	112542732	-	10513	0.141482	7.5738	2.29596	0.0375303	0.752838	-3.56099
ENSMUSG00000068742	Cry2	2	92233991	92264388	-	30398	0.0990159	7.82401	2.29497	0.037601	0.752838	-3.56424
ENSMUSG00000020681	Ace	11	105858771	105880790	+	22020	0.499739	3.94302	2.2947	0.0376199	0.752838	-3.67774
ENSMUSG00000042216	Sgsm1	5	113391086	113458652	-	67567	-0.214766	7.36652	-2.29235	0.0377887	0.752838	-3.56389
ENSMUSG00000024743	Syt7	19	10366454	10430544	+	64091	0.151931	8.31431	2.29206	0.0378092	0.752838	-3.5721
ENSMUSG00000028729	Ebna1bp2	4	118477996	118484973	+	6978	-0.0895623	5.64754	-2.29083	0.0378976	0.752838	-3.57014
ENSMUSG00000032458	Copb2	9	98445774	98470435	+	24662	-0.127904	6.62424	-2.28944	0.0379976	0.752838	-3.56438
ENSMUSG00000040856	Dlk1	12	109418749	109429262	+	10514	-0.390386	6.76093	-2.28884	0.0380407	0.752838	-3.56531
ENSMUSG00000022674	Ube2v2	16	15369941	15413637	-	43697	-0.121027	5.10389	-2.28828	0.0380811	0.752838	-3.58847
ENSMUSG00000022623	Shank3	15	89383826	89444464	+	60639	0.202821	8.92886	2.28489	0.0383267	0.752838	-3.58716
ENSMUSG00000028199	Cryz	3	154302348	154328819	+	26472	-0.199664	4.47802	-2.28466	0.0383434	0.752838	-3.6285
ENSMUSG00000028675	Pnrc2	4	135598229	135601161	-	2933	-0.0939932	5.17268	-2.2841	0.0383847	0.752838	-3.5909
ENSMUSG00000031530	Dusp4	8	35274451	35287048	+	12598	-0.38637	2.72395	-2.28242	0.0385069	0.752838	-3.87401
ENSMUSG00000020048	Hsp90b1	10	86526073	86541373	-	15301	-0.245619	8.16432	-2.28176	0.0385553	0.752838	-3.58333
ENSMUSG00000025409	Mbd6	10	127117825	127124887	-	7063	0.171288	5.59131	2.2817	0.0385596	0.752838	-3.58275
ENSMUSG00000026463	Atp2b4	1	133627195	133728779	-	101585	-0.277433	7.81043	-2.28121	0.0385955	0.752838	-3.58111
ENSMUSG00000089665	Fcor	8	3721188	3722362	-	1175	0.249669	2.23927	2.27997	0.0386859	0.753136	-3.95939
ENSMUSG00000002012	Pnck	X	72699600	72703723	-	4124	-0.211689	6.8858	-2.27648	0.038943	0.754827	-3.58119
ENSMUSG00000020823	Sec14l1	11	117005994	117050094	+	44101	0.188663	8.32807	2.27534	0.0390268	0.754827	-3.59257
ENSMUSG00000023018	Smarcd1	15	99600010	99611872	+	11863	0.140496	7.98411	2.27453	0.0390868	0.754827	-3.59068
ENSMUSG00000027342	Pcna	2	132091082	132095234	-	4153	-0.0956075	5.16395	-2.27282	0.0392136	0.754827	-3.60459
ENSMUSG00000046834	Krt1	15	101753861	101759229	-	5369	-0.351624	1.66922	-2.27103	0.0393473	0.754827	-4.05879
ENSMUSG00000080816	Gm12447	4	46327296	46327765	+	470	0.704112	-1.51511	2.27088	0.039358	0.754827	-4.4087
ENSMUSG00000041607	Mbp	18	82493271	82603762	+	110492	0.191528	11.4603	2.2706	0.0393793	0.754827	-3.63997
ENSMUSG00000032528	Vipr1	9	121471782	121502020	+	30239	0.159609	5.20571	2.26895	0.0395021	0.754827	-3.60815
ENSMUSG00000028383	Hsdl2	4	59581563	59618689	+	37127	-0.131572	5.00933	-2.26884	0.0395107	0.754827	-3.61507
ENSMUSG00000038497	Tmco3	8	13338190	13372924	+	34735	-0.0891785	5.52113	-2.26796	0.0395764	0.754827	-3.60066
ENSMUSG00000070934	Rraga	4	86493905	86495522	+	1618	-0.105637	6.73947	-2.26763	0.0396009	0.754827	-3.59197
ENSMUSG00000058239	Usf2	7	30644673	30656228	-	11556	0.102029	6.1901	2.26582	0.0397369	0.755167	-3.59523
ENSMUSG00000006522	Itih3	14	30630529	30645717	-	15189	-0.526106	4.68234	-2.26539	0.0397694	0.755167	-3.63641
ENSMUSG00000061589	Dot1l	10	80591040	80631295	+	40256	0.15265	6.58618	2.26392	0.0398799	0.755833	-3.59669
ENSMUSG00000055022	Cntn1	15	91949046	92239848	+	290803	-0.143164	8.39479	-2.25993	0.0401822	0.757374	-3.61182
ENSMUSG00000014313	Cox6c	15	35926032	35938392	-	12361	0.117544	7.51396	2.25671	0.0404272	0.757374	-3.60922
ENSMUSG00000038481	Cdk19	10	40215560	40359814	+	144255	0.196803	6.91294	2.25596	0.0404848	0.757374	-3.60723
ENSMUSG00000029022	Miip	4	147945235	147953273	-	8039	0.17593	4.78034	2.25525	0.0405391	0.757374	-3.64217
ENSMUSG00000024769	Cdc42bpg	19	6356486	6375682	+	19197	0.155151	3.82625	2.25509	0.0405512	0.757374	-3.7278
ENSMUSG00000071708	Sms	X	156226851	156275283	-	48433	-0.111613	6.81923	-2.25424	0.0406165	0.757374	-3.60894
ENSMUSG00000030357	Fkbp4	6	128406698	128415640	-	8943	-0.172024	6.73227	-2.25359	0.0406662	0.757374	-3.60958
ENSMUSG00000026020	Nop58	1	59724130	59758203	+	34074	-0.152064	5.45808	-2.25252	0.0407487	0.757374	-3.62074
ENSMUSG00000032116	Stt3a	9	36640640	36678975	-	38336	-0.137542	5.14178	-2.25158	0.0408215	0.757374	-3.63044
ENSMUSG00000029359	Tesc	5	118165808	118199943	+	34136	0.220351	6.73633	2.25033	0.0409177	0.757374	-3.61391
ENSMUSG00000024112	Cacna1h	17	25593259	25652757	-	59499	0.167184	7.2057	2.2499	0.0409508	0.757374	-3.61593
ENSMUSG00000034911	Ushbp1	8	71836916	71848446	-	11531	0.231142	2.98561	2.24884	0.0410335	0.757374	-3.85707
ENSMUSG00000035673	Sbno2	10	79892826	79941405	-	48580	0.129213	4.92961	2.2486	0.0410517	0.757374	-3.64238
ENSMUSG00000026121	Sema4c	1	36587720	36597430	-	9711	-0.148361	4.18718	-2.24797	0.0411003	0.757374	-3.69361
ENSMUSG00000027714	Exosc9	3	36606755	36619876	+	13122	-0.114629	5.17974	-2.24542	0.0412988	0.757374	-3.63651
ENSMUSG00000067786	Nnat	2	157401998	157404442	+	2445	-0.40906	7.91594	-2.24422	0.0413927	0.757374	-3.62731
ENSMUSG00000040785	Ttc3	16	94171477	94270202	+	98726	-0.113742	10.0247	-2.24186	0.0415773	0.757374	-3.65114
ENSMUSG00000044550	Tceal3	X	135491591	135569127	+	77537	-0.116833	6.55386	-2.24079	0.0416616	0.757374	-3.62555
ENSMUSG00000029447	Cct6a	5	129864062	129875212	+	11151	-0.104403	7.19952	-2.24055	0.0416807	0.757374	-3.62745
ENSMUSG00000022358	Fbxo32	15	58039275	58078328	-	39054	0.252219	5.53721	2.2401	0.0417156	0.757374	-3.63462
ENSMUSG00000030978	Rrm1	7	102090902	102118978	+	28077	-0.109159	4.4213	-2.23843	0.0418474	0.757374	-3.68316
ENSMUSG00000086165	Gm15690	5	120617907	120618968	-	1062	0.386011	-0.268041	2.23806	0.0418768	0.757374	-4.32214
ENSMUSG00000058454	Dhcr7	7	143376882	143402147	+	25266	-0.165099	5.46453	-2.23718	0.0419463	0.757374	-3.63915
ENSMUSG00000069516	Lyz2	10	117113236	117118226	-	4991	0.194409	3.38786	2.23686	0.0419717	0.757374	-3.80479
ENSMUSG00000032417	Rwdd2a	9	86454044	86456952	+	2909	-0.23918	3.84605	-2.23665	0.0419883	0.757374	-3.74242
ENSMUSG00000039745	Htatip2	7	49408863	49423723	+	14861	0.179661	2.96242	2.23571	0.0420627	0.757374	-3.87042
ENSMUSG00000052364	B630019K06Rik	X	8758621	8761203	+	2583	-0.248301	5.20659	-2.2357	0.0420631	0.757374	-3.64725
ENSMUSG00000019373	Cops3	11	59708621	59730664	-	22044	-0.11119	6.11579	-2.23554	0.0420763	0.757374	-3.63329
ENSMUSG00000033998	Kcnk1	8	126721909	126757424	+	35516	0.133832	6.21856	2.23321	0.0422614	0.75841	-3.63587
ENSMUSG00000056234	Ncoa4	14	31881822	31901812	+	19991	-0.134278	5.78694	-2.23291	0.0422852	0.75841	-3.63929
ENSMUSG00000030374	Strn4	7	16549814	16574856	+	25043	0.109164	7.9909	2.2308	0.0424536	0.760072	-3.64418
ENSMUSG00000025576	Rbfox3	11	118380588	118802423	-	421836	0.116268	8.16326	2.22529	0.0428971	0.763985	-3.65204
ENSMUSG00000113780	Gm33195	13	44018145	44022065	+	3921	0.287681	2.06597	2.22526	0.0428992	0.763985	-4.02104
ENSMUSG00000026173	Plcd4	1	74582047	74606953	+	24907	-0.150796	3.96159	-2.22516	0.0429073	0.763985	-3.74017
ENSMUSG00000023944	Hsp90ab1	17	45878701	45884197	-	5497	-0.143679	10.7164	-2.2243	0.042977	0.763985	-3.68009
ENSMUSG00000113165	Gm47863	12	85643793	85645965	-	2173	-0.234776	1.60724	-2.22212	0.0431539	0.764675	-4.09311
ENSMUSG00000037907	Ankrd13b	11	77361311	77380504	-	19194	0.103461	6.70694	2.22043	0.0432909	0.764675	-3.65117
ENSMUSG00000028016	Ints12	3	132797601	132816749	+	19149	-0.195963	3.48289	-2.21957	0.0433609	0.764675	-3.8054
ENSMUSG00000061898	Rbak	5	143157941	143166530	-	8590	0.121053	4.3406	2.21953	0.0433648	0.764675	-3.71029
ENSMUSG00000034910	Pygo1	9	72832927	72859463	+	26537	-0.135529	5.5659	-2.21851	0.0434475	0.764675	-3.65991
ENSMUSG00000030986	Dhx32	7	133322671	133384455	-	61785	0.206068	6.07983	2.21701	0.0435704	0.764675	-3.65676
ENSMUSG00000034908	Sidt2	9	45849155	45866556	-	17402	0.107475	6.66282	2.21696	0.0435749	0.764675	-3.65548
ENSMUSG00000034472	Rasd2	8	75940572	75950741	+	10170	0.35146	9.26763	2.21552	0.0436928	0.764675	-3.67309
ENSMUSG00000020605	Hs1bp3	12	8363432	8393824	+	30393	0.11778	4.79826	2.21541	0.0437023	0.764675	-3.68618
ENSMUSG00000035184	Fam124a	14	62793186	62845935	+	52750	0.154153	5.14292	2.2088	0.0442487	0.769076	-3.68106
ENSMUSG00000032216	Nedd4	9	72569628	72657134	+	87507	-0.102194	9.41588	-2.2086	0.0442649	0.769076	-3.68265
ENSMUSG00000056411	Gm12500	3	107992900	107995327	+	2428	0.668852	0.34723	2.20765	0.0443442	0.769076	-4.27152
ENSMUSG00000006215	Zbtb17	4	141171965	141195241	+	23277	0.106754	5.43216	2.20761	0.0443479	0.769076	-3.67555
ENSMUSG00000024924	Vldlr	19	27193884	27231631	+	37748	-0.12713	7.17769	-2.20631	0.0444562	0.769076	-3.66984
ENSMUSG00000085167	Gm12063	11	24026559	24027367	+	809	0.308991	0.421219	2.20623	0.044463	0.769076	-4.26118
ENSMUSG00000041380	Htr2c	X	145745509	145980273	+	234765	-0.195371	7.07996	-2.2059	0.0444907	0.769076	-3.67
ENSMUSG00000033419	Snap91	9	86647976	86762707	-	114732	-0.128063	8.00557	-2.20386	0.0446611	0.770692	-3.67704
ENSMUSG00000026247	Ecel1	1	87075377	87084243	-	8867	-0.21	6.13758	-2.20221	0.0448	0.771761	-3.67459
ENSMUSG00000038112	AW551984	9	39498692	39515699	-	17008	-0.657281	4.70163	-2.19752	0.045196	0.776024	-3.71206
ENSMUSG00000034168	Irf2bpl	12	86927475	86931572	-	4098	-0.110523	6.37694	-2.19723	0.0452207	0.776024	-3.68012
ENSMUSG00000032115	Hyou1	9	44290787	44303666	+	12880	-0.123397	6.99523	-2.19653	0.0452797	0.776024	-3.68137
ENSMUSG00000033294	Noc4l	5	110796284	110801283	-	5000	-0.120897	4.42361	-2.19427	0.0454722	0.777993	-3.73046
ENSMUSG00000045912	C2cd4c	10	79442688	79449859	-	7172	-0.278585	3.75251	-2.19244	0.0456292	0.778071	-3.79575
ENSMUSG00000023992	Trem2	17	48653429	48661175	+	7747	0.170907	4.29899	2.1922	0.0456498	0.778071	-3.74267
ENSMUSG00000029861	Fam131b	6	42292246	42301577	-	9332	0.124418	7.41454	2.1915	0.0457095	0.778071	-3.68912
ENSMUSG00000024270	Slc39a6	18	24712938	24736874	-	23937	-0.230732	5.12635	-2.18842	0.0459739	0.780198	-3.70507
ENSMUSG00000030134	Rasgef1a	6	117988399	118068507	+	80109	0.151763	8.8139	2.18719	0.04608	0.780198	-3.7024
ENSMUSG00000005892	Trh	6	92219042	92221631	-	2590	0.320636	2.92827	2.18661	0.0461303	0.780198	-3.91408
ENSMUSG00000024935	Slc1a1	19	28812449	28891360	+	78912	0.113042	7.00652	2.18597	0.0461859	0.780198	-3.69455
ENSMUSG00000040537	Adam22	5	8122352	8418160	-	295809	0.098721	7.90928	2.18315	0.0464305	0.780198	-3.70163
ENSMUSG00000032297	Celf6	9	59485200	59514575	+	29376	-0.185554	5.16589	-2.18264	0.0464747	0.780198	-3.71079
ENSMUSG00000027247	Arhgap1	2	91480205	91502671	+	22467	-0.0923978	6.63061	-2.18239	0.0464963	0.780198	-3.69841
ENSMUSG00000024735	Prpf19	19	10872595	10886923	+	14329	-0.0873919	7.6005	-2.18234	0.0465007	0.780198	-3.70113
ENSMUSG00000043940	Wdfy3	5	101980822	102217787	-	236966	-0.160448	8.08431	-2.18131	0.0465906	0.780198	-3.70476
ENSMUSG00000022629	Kif21a	15	90817479	90934151	-	116673	-0.10849	7.73337	-2.18033	0.0466764	0.780198	-3.7042
ENSMUSG00000066643	Wdr35	12	9023892	9078847	+	54956	-0.120399	5.80695	-2.17841	0.0468447	0.780198	-3.70589
ENSMUSG00000031575	Ash2l	8	26306024	26337722	-	31699	-0.0913631	5.81193	-2.17781	0.0468974	0.780198	-3.7066
ENSMUSG00000030869	Ndufab1	7	121684626	121701109	-	16484	-0.0855949	6.32583	-2.17751	0.0469233	0.780198	-3.70468
ENSMUSG00000021124	Vti1b	12	79202791	79219441	-	16651	0.124213	7.27823	2.17721	0.0469504	0.780198	-3.70617
ENSMUSG00000025499	Hras	7	140769018	140773918	-	4901	0.17723	7.28547	2.17662	0.0470018	0.780198	-3.70692
ENSMUSG00000003949	Hlf	11	90227362	90281721	-	54360	0.212138	7.38473	2.17452	0.0471871	0.780561	-3.70985
ENSMUSG00000028452	Vcp	4	42979963	43000507	-	20545	-0.114441	8.41001	-2.17344	0.0472823	0.780561	-3.71601
ENSMUSG00000038437	Mllt6	11	97554240	97576289	+	22050	0.100699	7.90176	2.17301	0.0473207	0.780561	-3.71388
ENSMUSG00000028412	Slc44a1	4	53440413	53622478	+	182066	0.0944793	6.69094	2.17235	0.0473787	0.780561	-3.71095
ENSMUSG00000021130	Galnt16	12	80565051	80677746	+	112696	-0.223699	7.53096	-2.17134	0.047469	0.780561	-3.71427
ENSMUSG00000026842	Abl1	2	31578388	31694239	+	115852	0.108337	6.64214	2.17109	0.0474907	0.780561	-3.7125
ENSMUSG00000094840	Muc3a	5	137243270	137246852	-	3583	0.454984	3.64763	2.16862	0.0477108	0.781673	-3.83309
ENSMUSG00000090291	Lrrc10b	19	10432735	10434837	-	2103	0.414059	7.41622	2.16858	0.0477143	0.781673	-3.71729
ENSMUSG00000031728	Zfp821	8	110432178	110451564	+	19387	0.088972	5.39155	2.16366	0.0481548	0.78533	-3.72871
ENSMUSG00000027663	Zmat3	3	32388941	32420163	-	31223	0.0989797	6.44704	2.16335	0.0481833	0.78533	-3.72213
ENSMUSG00000029364	Wsb2	5	117495369	117516666	+	21298	0.132984	8.14259	2.1622	0.0482867	0.78533	-3.72807
ENSMUSG00000103009	Gm4430	2	129039172	129041114	-	1943	-0.218751	2.2915	-2.16116	0.048381	0.78533	-4.02327
ENSMUSG00000092035	Peg10	6	4747306	4760517	+	13212	-0.504876	7.5995	-2.16107	0.0483884	0.78533	-3.72706
ENSMUSG00000027953	Slc50a1	3	89175553	89177877	-	2325	0.110775	4.67192	2.16073	0.0484196	0.78533	-3.75326
ENSMUSG00000052934	Fbxo31	8	122276179	122305545	-	29367	0.117476	7.31483	2.15919	0.0485587	0.78533	-3.72839
ENSMUSG00000034723	Tmx4	2	134436105	134486065	-	49961	-0.114478	8.08513	-2.15807	0.0486606	0.78533	-3.73276
ENSMUSG00000043962	Thrap3	4	126057875	126096553	-	38679	-0.0972298	6.98809	-2.15744	0.0487178	0.78533	-3.7297
ENSMUSG00000026576	Atp1b1	1	164264678	164285924	-	21247	-0.121063	10.1546	-2.15623	0.0488282	0.78533	-3.75029
ENSMUSG00000060671	Atp8b2	3	89846788	89870815	-	24028	0.105268	6.97075	2.15615	0.0488353	0.78533	-3.73131
ENSMUSG00000048000	Gigyf2	1	87254720	87378518	+	123799	-0.0937212	6.21173	-2.15569	0.0488775	0.78533	-3.73187
ENSMUSG00000030084	Plxna1	6	89293296	89339602	-	46307	-0.373589	6.10714	-2.15473	0.0489656	0.785487	-3.73335
ENSMUSG00000023809	Rps6ka2	17	7437514	7570714	+	133201	-0.155682	6.99865	-2.15175	0.0492378	0.78709	-3.73672
ENSMUSG00000034853	Acot11	4	106601752	106662195	-	60444	-0.187379	5.58692	-2.1511	0.0492984	0.78709	-3.74104
ENSMUSG00000040483	Xaf1	11	72192455	72204559	+	12105	0.202584	3.02012	2.15107	0.049301	0.78709	-3.92721
ENSMUSG00000095098	Ccdc85b	19	5503208	5507922	-	4715	0.174808	6.57729	2.14941	0.049454	0.787918	-3.73934
ENSMUSG00000059213	Ddn	15	98701658	98707371	-	5714	0.174799	10.6939	2.14876	0.049514	0.787918	-3.76419
ENSMUSG00000031533	Mrps31	8	22901377	22919681	+	18305	-0.141391	4.49776	-2.14755	0.0496256	0.787918	-3.77607
ENSMUSG00000010066	Cacna2d2	9	107276811	107406542	+	129732	-0.215403	7.09585	-2.1471	0.0496673	0.787918	-3.74263
ENSMUSG00000029869	Ephb6	6	41582416	41597443	+	15028	0.252948	6.17367	2.14497	0.0498646	0.789799	-3.7453
ENSMUSG00000067787	Blcap	2	157398282	157413194	-	14913	-0.17904	7.09678	-2.14261	0.0500845	0.791037	-3.74814
ENSMUSG00000028004	Npy2r	3	82445690	82455391	-	9702	-0.342402	3.991	-2.14205	0.0501373	0.791037	-3.81961
ENSMUSG00000030284	Creld1	6	113460258	113470304	+	10047	-0.0915978	6.73181	-2.1416	0.0501795	0.791037	-3.74895
ENSMUSG00000054404	Slfn5	11	82842175	82855666	+	13492	0.227576	3.24448	2.13993	0.0503352	0.791117	-3.90622
ENSMUSG00000052415	Tchh	3	93349637	93356384	+	6748	-0.202124	2.7717	-2.13975	0.0503528	0.791117	-3.96921
ENSMUSG00000025224	Gbf1	19	46140948	46274949	+	134002	-0.123752	6.80557	-2.13815	0.0505023	0.791117	-3.75323
ENSMUSG00000027495	Fam210b	2	172187485	172197669	+	10185	-0.13977	5.69739	-2.13528	0.0507729	0.791117	-3.75908
ENSMUSG00000052105	Mtcl1	17	66643977	66756745	-	112769	0.217182	7.25149	2.13506	0.0507944	0.791117	-3.75777
ENSMUSG00000038888	Ctu1	7	43321440	43327722	+	6283	-0.173379	3.47719	-2.13374	0.0509192	0.791117	-3.88145
ENSMUSG00000040560	Wdr7	18	63841756	64122847	+	281092	-0.113175	7.77751	-2.13345	0.0509469	0.791117	-3.76119
ENSMUSG00000030605	Mfge8	7	78783516	78798808	-	15293	-0.208019	7.8473	-2.13344	0.0509479	0.791117	-3.76145
ENSMUSG00000004054	Map3k11	19	5738770	5752893	+	14124	0.0974074	5.32817	2.13306	0.0509841	0.791117	-3.76591
ENSMUSG00000021032	Ngb	12	87144305	87149313	-	5009	-1.0227	2.31697	-2.13264	0.0510234	0.791117	-4.04376
ENSMUSG00000020571	Pdia6	12	17316546	17334771	+	18226	-0.154043	6.70869	-2.1317	0.0511127	0.791117	-3.76112
ENSMUSG00000031210	Gpr165	X	95757047	95762994	+	5948	-0.527326	2.93848	-2.13145	0.0511363	0.791117	-3.95373
ENSMUSG00000112441	Gm48898	12	8341024	8343694	-	2671	0.304178	0.773155	2.12857	0.0514112	0.791117	-4.24794
ENSMUSG00000032114	Slc37a4	9	44308149	44314265	+	6117	0.135153	4.30982	2.12789	0.0514763	0.791117	-3.80887
ENSMUSG00000002475	Abhd3	18	10642092	10706771	-	64680	-0.143489	5.65737	-2.1269	0.0515715	0.791117	-3.76947
ENSMUSG00000035297	Cops4	5	100666175	100695669	+	29495	-0.0707233	6.24279	-2.12501	0.0517527	0.791117	-3.76954
ENSMUSG00000020986	Sec23a	12	59005169	59058803	-	53635	-0.102875	6.58478	-2.1244	0.0518113	0.791117	-3.77008
ENSMUSG00000042116	Vwa1	4	155852606	155859155	-	6550	0.18993	5.06381	2.12409	0.0518415	0.791117	-3.78148
ENSMUSG00000030008	Pradc1	6	85423792	85428952	-	5161	0.272276	4.14178	2.12389	0.051861	0.791117	-3.82565
ENSMUSG00000004980	Hnrnpa2b1	6	51437912	51446874	-	8963	-0.132837	8.70678	-2.12362	0.0518871	0.791117	-3.77675
ENSMUSG00000030621	Me3	7	89281600	89503567	+	221968	0.158629	6.86069	2.1234	0.0519082	0.791117	-3.77147
ENSMUSG00000050953	Gja1	10	56253426	56278609	+	25184	-0.175232	7.24316	-2.12327	0.0519205	0.791117	-3.77209
ENSMUSG00000038279	Nop2	6	125108872	125121716	+	12845	-0.111859	4.72011	-2.12155	0.0520864	0.79244	-3.79414
ENSMUSG00000047507	Baiap3	17	25461633	25475338	-	13706	-0.562192	6.81674	-2.11959	0.0522765	0.79338	-3.77609
ENSMUSG00000022848	Slc49a4	16	35514432	35589726	-	75295	0.0687861	6.3029	2.1184	0.0523928	0.79338	-3.77761
ENSMUSG00000028453	Fancg	4	43002343	43010506	-	8164	0.137024	4.23726	2.11707	0.052522	0.79338	-3.8249
ENSMUSG00000089762	Ier5l	2	30361549	30364231	-	2683	0.162137	4.53632	2.11701	0.052528	0.79338	-3.80766
ENSMUSG00000097801	Gm26777	12	80556725	80565690	-	8966	-0.230141	3.33986	-2.11669	0.0525593	0.79338	-3.9127
ENSMUSG00000023156	Rpp14	14	14377939	14389406	-	11468	-0.0793952	5.02221	-2.11569	0.0526574	0.79338	-3.79174
ENSMUSG00000000738	Spg7	8	123789681	123824499	+	34819	0.0889865	5.84359	2.1143	0.0527935	0.79338	-3.78366
ENSMUSG00000050786	Ccdc126	6	49296208	49318516	+	22309	-0.128547	3.62219	-2.11403	0.0528191	0.79338	-3.88243
ENSMUSG00000083307	AA414768	X	12803111	12804367	+	1257	-0.149185	2.89123	-2.11246	0.0529737	0.79338	-3.9731
ENSMUSG00000040390	Map3k10	7	27355800	27374023	-	18224	0.146993	7.87667	2.11214	0.053005	0.79338	-3.78713
ENSMUSG00000038400	Pmepa1	2	173066251	173118326	-	52076	0.225868	6.53631	2.11142	0.0530757	0.79338	-3.78608
ENSMUSG00000031167	Rbm3	X	8005214	8012119	-	6906	0.226041	6.25401	2.10622	0.0535907	0.79338	-3.7926
ENSMUSG00000040385	Ppp1ca	19	4242064	4245419	+	3356	0.158116	8.36476	2.10492	0.0537194	0.79338	-3.79732
ENSMUSG00000051811	Cox6b2	7	4754791	4756093	-	1303	-0.354708	0.719203	-2.10445	0.0537668	0.79338	-4.26205
ENSMUSG00000096188	Cmtm4	8	105074823	105122439	-	47617	-0.105623	7.37194	-2.10387	0.0538246	0.79338	-3.79592
ENSMUSG00000028059	Arhgef2	3	88513273	88555359	+	42087	0.119148	7.41031	2.10331	0.0538801	0.79338	-3.79667
ENSMUSG00000078816	Prkcg	7	3337704	3379615	+	41912	0.111807	8.10559	2.10232	0.0539792	0.79338	-3.79954
ENSMUSG00000040721	Zfhx2	14	55297719	55329781	-	32063	0.0974837	6.72084	2.10168	0.0540432	0.79338	-3.798
ENSMUSG00000089998	Phtf1os	3	103871852	103875897	-	4046	0.289842	1.3456	2.10114	0.0540979	0.79338	-4.18898
ENSMUSG00000073411	H2-D1	17	35481706	35486475	+	4770	0.227952	5.33331	2.09922	0.0542903	0.79338	-3.80566
ENSMUSG00000021555	Naa35	13	59733073	59783736	+	50664	-0.0907452	5.7321	-2.09914	0.0542986	0.79338	-3.80237
ENSMUSG00000033578	Tmem35a	X	133195974	133206718	+	10745	-0.135315	6.44536	-2.09877	0.0543356	0.79338	-3.80155
ENSMUSG00000019194	Scn1b	7	30815949	30826428	-	10480	0.225743	7.56703	2.0985	0.0543627	0.79338	-3.80277
ENSMUSG00000022847	Thpo	16	20543204	20553261	-	10058	0.266269	3.17331	2.09758	0.0544558	0.79338	-3.94976
ENSMUSG00000001054	Rmnd5b	11	51514498	51526723	-	12226	0.0910844	6.06678	2.09628	0.0545867	0.79338	-3.8049
ENSMUSG00000034617	Mtrr	13	68708899	68730268	-	21370	-0.14343	3.82442	-2.09464	0.0547529	0.79338	-3.88003
ENSMUSG00000017466	Timp2	11	118191895	118246566	-	54672	-0.131101	8.72119	-2.09301	0.0549183	0.79338	-3.81272
ENSMUSG00000038495	Otud7b	3	96011839	96068446	+	56608	0.113339	6.10839	2.09181	0.055041	0.79338	-3.81028
ENSMUSG00000002147	Stat6	10	127478855	127496826	+	17972	0.247051	3.60904	2.0911	0.0551134	0.79338	-3.90557
ENSMUSG00000030584	Dpf1	7	29003376	29017668	+	14293	0.121442	6.30445	2.09105	0.0551184	0.79338	-3.81106
ENSMUSG00000010803	Gabra1	11	42021766	42073757	-	51992	-0.312296	7.25483	-2.08992	0.0552339	0.79338	-3.81267
ENSMUSG00000024955	Esrra	19	6888345	6899208	-	10864	0.110743	5.95314	2.08875	0.0553536	0.79338	-3.81423
ENSMUSG00000085069	Prdm16os	4	154722033	154729181	+	7149	-0.190732	4.51278	-2.08869	0.0553595	0.79338	-3.83853
ENSMUSG00000030790	Adm	7	110226868	110229027	+	2160	0.454209	0.0541481	2.08847	0.055382	0.79338	-4.33389
ENSMUSG00000020230	Prmt2	10	76043056	76073699	-	30644	-0.148444	6.14562	-2.08791	0.0554389	0.79338	-3.81495
ENSMUSG00000036959	Bcorl1	X	47430235	47496926	+	66692	-0.0949427	5.20515	-2.08586	0.0556501	0.79338	-3.82269
ENSMUSG00000026811	St6galnac6	2	32489721	32510818	+	21098	0.138103	7.07408	2.08529	0.0557081	0.79338	-3.81815
ENSMUSG00000118026	Gm50335	17	34346894	34348384	-	1491	0.443605	1.37804	2.08417	0.0558239	0.79338	-4.19391
ENSMUSG00000052534	Pbx1	1	167946933	168259839	-	312907	-0.130494	7.55342	-2.08412	0.0558295	0.79338	-3.82006
ENSMUSG00000023952	Gtpbp2	17	46471958	46480296	+	8339	0.105006	6.06725	2.0838	0.0558623	0.79338	-3.82004
ENSMUSG00000045790	Ccdc149	5	52531993	52628863	-	96871	0.0979571	6.06471	2.08255	0.0559912	0.79338	-3.82156
ENSMUSG00000030061	Uba3	6	97160631	97182608	-	21978	-0.123137	5.97006	-2.07792	0.056473	0.79338	-3.82725
ENSMUSG00000003814	Calr	8	85568479	85573563	-	5085	-0.18469	8.2976	-2.07712	0.0565558	0.79338	-3.82994
ENSMUSG00000034807	Colgalt1	8	72063642	72077555	+	13914	0.13086	6.23466	2.07697	0.0565714	0.79338	-3.82822
ENSMUSG00000113309	Gm48408	13	15943575	15944705	-	1131	0.274627	2.80782	2.07687	0.0565824	0.79338	-4.01122
ENSMUSG00000045509	Gpr150	13	76202970	76205115	-	2146	-0.500069	1.71645	-2.07552	0.0567237	0.79338	-4.15308
ENSMUSG00000019087	Atp6ap1	X	73340703	73348327	+	7625	-0.0800711	8.44316	-2.07525	0.0567516	0.79338	-3.83255
ENSMUSG00000035314	Gdpd5	7	99030621	99111084	+	80464	0.170905	6.10589	2.07443	0.056838	0.79338	-3.83137
ENSMUSG00000022096	Hr	14	70789652	70810988	+	21337	0.202226	4.48893	2.07417	0.0568651	0.79338	-3.85584
ENSMUSG00000026814	Eng	2	32536607	32572681	+	36075	0.294635	5.36693	2.07212	0.0570802	0.79338	-3.83701
ENSMUSG00000020325	Fstl3	10	79613106	79618464	+	5359	0.28692	1.89478	2.07206	0.0570867	0.79338	-4.13197
ENSMUSG00000030738	Eif3c	7	126145627	126165583	-	19957	-0.100547	7.68584	-2.07069	0.0572315	0.79338	-3.83635
ENSMUSG00000083413	Vmn1r-ps110	13	22812241	22813334	-	1094	-0.646413	-0.879992	-2.07007	0.0572971	0.79338	-4.40623
ENSMUSG00000058070	Eml1	12	108337216	108505876	+	168661	0.133957	6.55331	2.06965	0.0573416	0.79338	-3.8371
ENSMUSG00000090050	Gm16339	12	102094065	102096165	-	2101	0.242442	2.0295	2.06873	0.0574383	0.79338	-4.11617
ENSMUSG00000040703	Cyp2s1	7	25501900	25516338	-	14439	0.328007	3.42418	2.06791	0.0575261	0.79338	-3.94574
ENSMUSG00000074682	Zcchc3	2	152253875	152256947	-	3073	-0.22234	3.54323	-2.0666	0.0576647	0.79338	-3.93303
ENSMUSG00000021149	Gtpbp4	13	9016367	9046119	-	29753	-0.113774	5.27177	-2.06542	0.05779	0.79338	-3.84552
ENSMUSG00000039542	Ncam1	9	49413436	49710225	-	296790	-0.106751	8.44393	-2.06526	0.0578076	0.79338	-3.84428
ENSMUSG00000035206	Sppl2b	10	80691109	80704542	+	13434	0.123866	5.52204	2.06513	0.057821	0.79338	-3.84395
ENSMUSG00000043252	Tmem64	4	15265831	15286753	+	20923	-0.108664	5.69557	-2.06298	0.0580511	0.79338	-3.84573
ENSMUSG00000004341	Gpx6	13	21496295	21503794	+	7500	0.739812	1.54159	2.0608	0.0582848	0.79338	-4.18806
ENSMUSG00000041891	Lman1	18	66113809	66155651	-	41843	-0.117963	5.8918	-2.06017	0.0583522	0.79338	-3.84871
ENSMUSG00000023033	Scn8a	15	100767739	100943819	+	176081	0.118783	8.28513	2.06017	0.0583528	0.79338	-3.84988
ENSMUSG00000048489	Depp1	6	116627570	116629755	+	2186	0.545255	0.77856	2.05998	0.0583727	0.79338	-4.2743
ENSMUSG00000093629	Prox2os	12	85133148	85135002	+	1855	0.535959	2.05529	2.05913	0.0584646	0.79338	-4.12132
ENSMUSG00000034648	Lrrn1	6	107506729	107547175	+	40447	-0.130548	5.96706	-2.05881	0.058499	0.79338	-3.85029
ENSMUSG00000063902	Gm7964	7	83405112	83406489	+	1378	-0.375988	0.331967	-2.05749	0.0586408	0.79338	-4.3171
ENSMUSG00000076439	Mog	17	37321635	37334290	-	12656	0.150665	6.19229	2.05693	0.0587018	0.79338	-3.85252
ENSMUSG00000007891	Ctsd	7	141929648	141941775	-	12128	-0.146843	5.88918	-2.0568	0.0587157	0.79338	-3.85276
ENSMUSG00000024818	Slc25a45	19	5927836	5935906	+	8071	0.162224	2.45794	2.05619	0.0587822	0.79338	-4.06866
ENSMUSG00000033417	Cacul1	19	60513134	60569463	-	56330	-0.122897	6.10061	-2.05609	0.0587927	0.79338	-3.85353
ENSMUSG00000051675	Trim32	4	65523223	65534475	+	11253	-0.0939905	7.60461	-2.05607	0.0587948	0.79338	-3.85374
ENSMUSG00000027374	Mrps5	2	127429142	127448749	+	19608	-0.0988879	5.64254	-2.05577	0.0588269	0.79338	-3.85445
ENSMUSG00000023046	Igfbp6	15	102052797	102057946	+	5150	0.35354	3.61451	2.05346	0.0590774	0.79338	-3.93951
ENSMUSG00000041133	Smc1a	X	150799424	150845690	+	46267	-0.123692	6.74592	-2.05298	0.0591296	0.79338	-3.85734
ENSMUSG00000040714	Klc3	7	19128362	19138029	-	9668	0.290103	2.25699	2.05267	0.059164	0.79338	-4.09692
ENSMUSG00000026553	Copa	1	171910096	171949897	+	39802	-0.100508	7.87315	-2.05145	0.0592971	0.79338	-3.8595
ENSMUSG00000028655	Mfsd2a	4	122840643	122854981	-	14339	0.151007	4.61377	2.05062	0.0593877	0.79338	-3.87587
ENSMUSG00000029992	Gfpt1	6	87019828	87069179	+	49352	-0.103731	6.39938	-2.04898	0.0595665	0.79338	-3.86218
ENSMUSG00000021360	Gcnt2	13	41013230	41114368	+	101139	0.351767	6.00236	2.0488	0.0595862	0.79338	-3.86232
ENSMUSG00000039910	Cited2	10	17598966	17601422	+	2457	-0.155532	4.72298	-2.04735	0.0597456	0.79338	-3.87567
ENSMUSG00000004933	Matk	10	81088769	81099199	+	10431	0.120832	7.73442	2.04689	0.0597962	0.79338	-3.86478
ENSMUSG00000097929	Tunar	12	105300129	105350191	+	50063	-0.373187	4.6055	-2.04552	0.059947	0.79338	-3.88139
ENSMUSG00000041124	Msantd4	9	4376562	4386870	+	10309	-0.0939574	5.7996	-2.04552	0.0599473	0.79338	-3.86633
ENSMUSG00000022774	Ncbp2	16	31767331	31780599	+	13269	-0.085228	5.88297	-2.04381	0.0601358	0.79338	-3.86831
ENSMUSG00000038375	Trp53inp2	2	155222979	155231770	+	8792	0.155022	7.45022	2.04257	0.0602733	0.79338	-3.8698
ENSMUSG00000039079	Trhr2	8	123083706	123087485	-	3780	0.347819	3.01189	2.04071	0.060479	0.79338	-4.01376
ENSMUSG00000053841	Txlna	4	129519871	129534858	-	14988	0.0727016	6.04913	2.04033	0.0605215	0.79338	-3.87249
ENSMUSG00000046027	Stard5	7	83281167	83302335	+	21169	-0.444053	4.97934	-2.03916	0.0606517	0.79338	-3.87944
ENSMUSG00000057113	Npm1	11	33102287	33113206	-	10920	-0.098378	7.0363	-2.03777	0.0608067	0.79338	-3.87564
ENSMUSG00000097121	D130020L05Rik	12	101048710	101055186	+	6477	0.208625	2.41754	2.03776	0.0608079	0.79338	-4.08583
ENSMUSG00000105345	BC030343	5	143255830	143258268	+	2439	0.163513	3.16576	2.03774	0.0608101	0.79338	-3.99789
ENSMUSG00000027248	Pdia3	2	121244256	121269168	+	24913	-0.155253	7.37543	-2.03734	0.0608551	0.79338	-3.87605
ENSMUSG00000036667	Tcaf1	6	42644936	42687022	-	42087	-0.164754	8.86	-2.03728	0.0608619	0.79338	-3.87794
ENSMUSG00000115936	4833415N18Rik	16	11596293	11599364	+	3072	0.315639	3.75703	2.03523	0.0610915	0.79338	-3.94256
ENSMUSG00000046287	Pnma3	X	72108393	72111797	+	3405	-0.319433	4.24467	-2.03481	0.0611379	0.79338	-3.90824
ENSMUSG00000086328	2700033N17Rik	2	115896699	115897925	-	1227	-0.235602	1.16555	-2.03445	0.0611784	0.79338	-4.2389
ENSMUSG00000071176	Arhgef10	8	14961663	15051085	+	89423	0.0976264	6.07595	2.03384	0.0612473	0.79338	-3.8803
ENSMUSG00000021400	Wrnip1	13	32986021	33006592	+	20572	-0.0683181	6.10719	-2.0332	0.0613189	0.79338	-3.8811
ENSMUSG00000027534	Snx16	3	10482877	10505162	-	22286	-0.137649	4.70978	-2.03273	0.0613721	0.79338	-3.89198
ENSMUSG00000057637	Prdm2	4	142833961	142939565	-	105605	-0.0865535	6.23612	-2.0322	0.0614316	0.79338	-3.88239
ENSMUSG00000021047	Nova1	12	46741300	46865712	-	124413	-0.16378	6.16085	-2.03054	0.0616185	0.79338	-3.88434
ENSMUSG00000001569	Nom1	5	29639662	29662841	+	23180	-0.114043	5.20761	-2.03035	0.0616402	0.79338	-3.88652
ENSMUSG00000062933	Gm10123	9	96777711	96778200	+	490	0.368	-0.176899	2.02944	0.0617432	0.79338	-4.36814
ENSMUSG00000028863	Meaf6	4	124978927	125007031	+	28105	-0.0966763	7.20917	-2.0286	0.0618391	0.79338	-3.88658
ENSMUSG00000020607	Lratd1	12	14196831	14202055	-	5225	-0.133671	6.47994	-2.02779	0.0619302	0.79338	-3.88783
ENSMUSG00000063632	Sox11	12	27384263	27392573	-	8311	-0.228694	4.10039	-2.02757	0.0619552	0.79338	-3.92366
ENSMUSG00000079215	Zfp664	5	124939755	124979757	+	40003	0.0722042	7.12073	2.02747	0.0619671	0.79338	-3.88798
ENSMUSG00000002227	Mov10	3	104702152	104725879	-	23728	0.228696	4.2843	2.02726	0.0619909	0.79338	-3.91431
ENSMUSG00000082922	Gm6939	7	126286631	126289206	-	2576	0.320857	0.700764	2.02706	0.062013	0.79338	-4.29242
ENSMUSG00000022201	Zfr	15	12117917	12185769	+	67853	-0.130241	8.25321	-2.02687	0.0620354	0.79338	-3.88887
ENSMUSG00000026965	Anapc2	2	25162490	25175927	+	13438	-0.0844072	6.58269	-2.02668	0.0620566	0.79338	-3.88919
ENSMUSG00000038046	Mrm3	11	76134541	76141445	+	6905	-0.129336	3.70255	-2.02668	0.0620573	0.79338	-3.9537
ENSMUSG00000041997	Tlk1	2	70542751	70656072	-	113322	0.165367	6.86758	2.02481	0.06227	0.79338	-3.89132
ENSMUSG00000028982	Slc25a33	4	149828493	149858734	-	30242	0.137068	5.43145	2.02456	0.0622979	0.79338	-3.89186
ENSMUSG00000103452	1700008A23Rik	9	99204879	99205569	+	691	0.707822	-1.58352	2.02456	0.0622983	0.79338	-4.45259
ENSMUSG00000032121	Tmem218	9	37119519	37135996	+	16478	0.147832	3.64597	2.02431	0.0623267	0.79338	-3.96125
ENSMUSG00000002731	Prkra	2	76460242	76478359	-	18118	-0.165781	3.99427	-2.02415	0.0623451	0.79338	-3.93377
ENSMUSG00000099784	Dalir	1	42789872	42792041	+	2170	0.284075	1.27378	2.02315	0.06246	0.79338	-4.23249
ENSMUSG00000020190	Mknk2	10	80501161	80513946	-	12786	0.120256	5.76259	2.0224	0.062545	0.79338	-3.89381
ENSMUSG00000019188	H13	2	152511381	152550590	+	39210	-0.128275	6.47963	-2.02157	0.0626411	0.79338	-3.89535
ENSMUSG00000002831	Plin4	17	56407591	56416803	-	9213	0.592402	2.30308	2.02054	0.0627592	0.79338	-4.11327
ENSMUSG00000047935	Sox1ot	8	12435771	12486768	+	50998	-0.286359	6.43747	-2.02032	0.0627847	0.79338	-3.89683
ENSMUSG00000031986	Sprtn	8	125624625	125632900	+	8276	0.0799563	4.84724	2.0201	0.0628098	0.79338	-3.90292
ENSMUSG00000074030	Exoc8	8	125619847	125624444	-	4598	-0.0973499	4.79141	-2.01981	0.0628426	0.79338	-3.9042
ENSMUSG00000038780	Smurf1	5	144813305	144902657	-	89353	0.0890235	6.50457	2.01882	0.0629569	0.79338	-3.89863
ENSMUSG00000070427	Il18bp	7	101664092	101667897	-	3806	0.252054	3.1196	2.01777	0.0630781	0.79338	-4.01889
ENSMUSG00000042439	Zfp532	18	65712983	65822514	+	109532	-0.0881592	6.18975	-2.01758	0.0630998	0.79338	-3.89993
ENSMUSG00000022995	Enah	1	181723949	181847555	-	123607	-0.164982	7.26899	-2.01692	0.0631765	0.79338	-3.90052
ENSMUSG00000005150	Wdr83	8	85801664	85807935	-	6272	0.0911274	4.72754	2.01661	0.0632121	0.79338	-3.90928
ENSMUSG00000029265	Dr1	5	108416763	108428392	+	11630	-0.154709	4.66697	-2.01564	0.0633245	0.79338	-3.9116
ENSMUSG00000075271	Ttc30a1	2	75808591	75812311	-	3721	-0.200303	2.07868	-2.01529	0.0633654	0.79338	-4.13942
ENSMUSG00000021466	Ptch1	13	63656142	63721412	-	65271	-0.117369	7.00032	-2.01503	0.0633949	0.79338	-3.90301
ENSMUSG00000028936	Rpl22	4	152410199	152418528	+	8330	0.106841	6.30032	2.01496	0.0634028	0.79338	-3.90315
ENSMUSG00000086844	B230206H07Rik	7	140939054	140945023	-	5970	0.26018	2.83519	2.01366	0.063554	0.79338	-4.05344
ENSMUSG00000021796	Bmpr1a	14	34132691	34225298	-	92608	-0.10469	5.9891	-2.01357	0.0635644	0.79338	-3.90449
ENSMUSG00000032932	Hspa13	16	75542319	75563992	-	21674	-0.143088	5.65201	-2.01212	0.0637331	0.79338	-3.90595
ENSMUSG00000037747	Phyhipl	10	70393512	70491795	-	98284	-0.156496	7.24583	-2.01135	0.0638234	0.79338	-3.90718
ENSMUSG00000024845	Tmem134	19	4175934	4182306	+	6373	0.147829	4.93622	2.01062	0.0639085	0.79338	-3.91202
ENSMUSG00000113781	Gm35558	12	110563590	110563793	-	204	0.692572	-2.30779	2.01051	0.0639211	0.79338	-4.48217
ENSMUSG00000019254	Ppp1r12c	7	4484519	4504679	-	20161	0.101527	7.17435	2.01039	0.0639351	0.79338	-3.90838
ENSMUSG00000028991	Mtor	4	148533068	148642140	+	109073	-0.0987694	7.41577	-2.01008	0.0639722	0.79338	-3.90855
ENSMUSG00000036599	Chst12	5	140491305	140511479	+	20175	0.118542	4.13719	2.00899	0.0640997	0.79338	-3.94006
ENSMUSG00000016541	Atxn10	15	85220446	85347413	+	126968	-0.0781335	7.9848	-2.00751	0.064273	0.79338	-3.91137
ENSMUSG00000062031	Pgghg	7	140521304	140527577	+	6274	0.178765	2.672	2.00721	0.0643087	0.79338	-4.07611
ENSMUSG00000056938	Acbd4	11	102992508	103003026	+	10519	0.0978812	5.33032	2.00658	0.0643822	0.79338	-3.91304
ENSMUSG00000033096	Apmap	2	150425000	150450487	-	25488	-0.0895006	5.85966	-2.00657	0.0643837	0.79338	-3.91265
ENSMUSG00000056999	Ide	19	37246142	37340010	-	93869	-0.115303	6.64333	-2.00541	0.0645198	0.79338	-3.9148
ENSMUSG00000026245	Farsb	1	78394612	78465534	-	70923	-0.116017	5.91789	-2.00521	0.0645437	0.79338	-3.91434
ENSMUSG00000118346	Tmem179b	19	8749889	8751831	-	1943	0.181315	2.47046	2.00518	0.0645468	0.79338	-4.10039
ENSMUSG00000023274	Cd4	6	124841655	124865184	-	23530	0.430586	6.14686	2.00461	0.0646149	0.79338	-3.91526
ENSMUSG00000026475	Rgs16	1	153616095	153621214	+	5120	-0.367328	3.13236	-2.00364	0.0647292	0.79338	-4.02823
ENSMUSG00000090125	Pou3f1	4	124550600	124554448	+	3849	0.303503	5.4852	2.00359	0.0647346	0.79338	-3.91609
ENSMUSG00000035227	Spcs2	7	99486776	99512669	-	25894	-0.0658151	6.42176	-2.00268	0.0648424	0.79338	-3.91803
ENSMUSG00000034620	Rxylt1	10	121914019	121933276	-	19258	-0.106408	4.72446	-2.00178	0.0649491	0.79338	-3.92524
ENSMUSG00000027998	Plrg1	3	82962829	82979662	+	16834	-0.12062	5.54808	-2.0012	0.0650185	0.79338	-3.91878
ENSMUSG00000056851	Pcbp2	15	102378974	102408496	+	29523	-0.0684056	7.72227	-2.0008	0.0650661	0.79338	-3.91932
ENSMUSG00000055430	Nap1l5	6	58882218	58884061	-	1844	-0.224061	7.76269	-1.99983	0.0651812	0.79338	-3.92044
ENSMUSG00000028790	Khdrbs1	4	129596957	129636096	-	39140	-0.0862997	6.93587	-1.99964	0.0652038	0.79338	-3.92153
ENSMUSG00000045994	B3gat1	9	26645024	26674397	+	29374	0.146189	8.0505	1.99957	0.0652124	0.79338	-3.92067
ENSMUSG00000013787	Ehmt2	17	35117445	35133028	+	15584	0.0915232	7.9802	1.99916	0.0652606	0.79338	-3.92115
ENSMUSG00000011179	Odc1	12	17594795	17601506	+	6712	-0.10938	6.0795	-1.99892	0.0652892	0.79338	-3.9221
ENSMUSG00000040811	Eml2	7	18910346	18940407	+	30062	0.118113	7.50426	1.99851	0.0653382	0.79338	-3.92218
ENSMUSG00000030036	Mogs	6	83092477	83095879	+	3403	-0.103097	4.91221	-1.99825	0.0653698	0.79338	-3.92589
ENSMUSG00000031904	Slc7a6	8	106895489	106925338	+	29850	0.195746	5.13779	1.99778	0.0654253	0.79338	-3.92421
ENSMUSG00000037995	Igsf9	1	172309355	172326445	+	17091	0.204705	3.22237	1.99702	0.0655157	0.79338	-4.02456
ENSMUSG00000041559	Fmod	1	133964992	133976015	+	11024	-0.629934	2.03211	-1.99687	0.0655343	0.79338	-4.15752
ENSMUSG00000026927	Entr1	2	26272814	26279328	-	6515	0.109773	6.67219	1.99665	0.0655601	0.79338	-3.92526
ENSMUSG00000020723	Cacng4	11	107623183	107685383	-	62201	0.172197	7.11246	1.99574	0.0656693	0.79338	-3.92593
ENSMUSG00000062006	Rpl34	3	130520480	130524047	-	3568	0.126794	6.74808	1.99529	0.0657233	0.79338	-3.92685
ENSMUSG00000035949	Fbxw2	2	34694526	34716323	-	21798	0.0869626	6.30132	1.99472	0.0657916	0.79338	-3.92742
ENSMUSG00000026788	Zbtb43	2	33340299	33358571	-	18273	0.0834387	5.39789	1.99397	0.0658813	0.79338	-3.92734
ENSMUSG00000025240	Sacm1l	9	123358824	123421665	+	62842	-0.160203	6.11343	-1.99326	0.0659674	0.79338	-3.92892
ENSMUSG00000022391	Rangap1	15	81588449	81629731	-	41283	-0.1083	7.80839	-1.99302	0.0659963	0.79338	-3.92841
ENSMUSG00000046269	Usp27x	X	7237513	7242069	-	4557	-0.160569	4.39619	-1.99231	0.0660814	0.793387	-3.9447
ENSMUSG00000022099	Dmtn	14	70838703	70873488	-	34786	0.114974	8.39675	1.9911	0.0662269	0.793387	-3.93056
ENSMUSG00000004961	Syt5	7	4542764	4550540	-	7777	-0.110748	7.9448	-1.99084	0.0662583	0.793387	-3.93089
ENSMUSG00000001909	Trmt1	8	85412936	85426437	+	13502	0.113474	5.96387	1.98996	0.0663657	0.793387	-3.93249
ENSMUSG00000089832	Shkbp1	7	27041558	27055444	-	13887	0.213554	3.92742	1.98973	0.0663926	0.793387	-3.97171
ENSMUSG00000028822	Tmem50a	4	134625160	134642335	-	17176	0.08943	6.32042	1.98826	0.0665713	0.793875	-3.93517
ENSMUSG00000029219	Slc10a4	5	73164226	73170298	+	6073	-0.254364	4.43655	-1.98809	0.0665918	0.793875	-3.94767
ENSMUSG00000026024	Als2	1	59202085	59276390	-	74306	-0.0987583	5.5819	-1.9867	0.0667607	0.794381	-3.93567
ENSMUSG00000020361	Hspa4	11	53150641	53191284	-	40644	-0.107336	7.95072	-1.98376	0.0671195	0.794381	-3.93916
ENSMUSG00000062526	Mppe1	18	67358114	67378901	-	20788	0.120683	4.92621	1.98332	0.0671724	0.794381	-3.94232
ENSMUSG00000050017	Pitpnb	5	111478629	111536225	+	57597	0.0780971	6.57683	1.98269	0.0672498	0.794381	-3.94199
ENSMUSG00000042417	Ccno	13	113124336	113127311	+	2976	0.344812	2.76335	1.98109	0.0674462	0.794381	-4.08506
ENSMUSG00000021259	Cyp46a1	12	108300640	108328493	+	27854	0.141974	8.02608	1.98073	0.0674899	0.794381	-3.94264
ENSMUSG00000029168	Dpysl5	5	30868908	30956719	+	87812	-0.129236	5.97528	-1.98051	0.0675172	0.794381	-3.94375
ENSMUSG00000019139	Isyna1	8	71047023	71049940	+	2918	-0.0985348	6.04415	-1.98012	0.0675653	0.794381	-3.94439
ENSMUSG00000086040	Wipf3	6	54406588	54480753	+	74166	0.156973	8.0175	1.98001	0.067579	0.794381	-3.94349
ENSMUSG00000038683	Pak1ip1	13	41154499	41166491	+	11993	-0.0873402	5.54903	-1.97956	0.0676337	0.794381	-3.94394
ENSMUSG00000032883	Acsl3	1	78635542	78685460	+	49919	-0.111789	7.43152	-1.97876	0.0677326	0.794381	-3.94562
ENSMUSG00000025040	Fundc1	X	17422803	17438564	-	15762	-0.112623	5.29107	-1.97809	0.0678151	0.794381	-3.94576
ENSMUSG00000039509	Nup133	8	124623862	124676004	-	52143	-0.122884	5.30052	-1.97793	0.0678347	0.794381	-3.94592
ENSMUSG00000029075	Tnfrsf4	4	156098300	156101069	+	2770	0.266789	0.878821	1.97713	0.0679341	0.794381	-4.29292
ENSMUSG00000063018	2010204K13Rik	X	7278056	7311382	-	33327	-0.142623	4.50665	-1.97606	0.068066	0.794381	-3.958
ENSMUSG00000038705	Gmeb2	2	180893242	180929828	-	36587	0.103624	4.96717	1.97342	0.0683935	0.794381	-3.95282
ENSMUSG00000034993	Vat1	11	101349571	101357056	-	7486	-0.198562	5.90975	-1.97289	0.0684597	0.794381	-3.95258
ENSMUSG00000109362	Gm44562	7	58908603	58909949	-	1347	0.517786	-0.169	1.97241	0.068519	0.794381	-4.38286
ENSMUSG00000022199	Slc22a17	14	55143761	55150589	-	6829	-0.102171	9.71267	-1.97232	0.0685302	0.794381	-3.95376
ENSMUSG00000026860	Sh3glb2	2	30234821	30249349	-	14529	0.0823932	8.03835	1.97216	0.0685502	0.794381	-3.9526
ENSMUSG00000032601	Prkar2a	9	108566513	108627635	+	61123	-0.137403	6.09277	-1.97149	0.0686341	0.794381	-3.95475
ENSMUSG00000024130	Abca3	17	24570924	24629175	+	58252	-0.0849349	7.02579	-1.97088	0.0687107	0.794381	-3.9557
ENSMUSG00000000555	Itga5	15	103252713	103275190	-	22478	0.36528	4.31873	1.97058	0.0687479	0.794381	-3.97083
ENSMUSG00000039536	Stau1	2	166789469	166838219	-	48751	-0.0786904	6.18599	-1.96815	0.0690521	0.794381	-3.95894
ENSMUSG00000056305	Usp39	6	72295661	72322167	-	26507	-0.0828526	5.04668	-1.96701	0.0691951	0.794381	-3.95926
ENSMUSG00000026482	Rgl1	1	152392511	152642102	-	249592	-0.0881959	7.29866	-1.96677	0.0692252	0.794381	-3.96002
ENSMUSG00000004865	Srpk1	17	28806622	28841683	-	35062	0.0959296	6.38252	1.96659	0.0692479	0.794381	-3.96108
ENSMUSG00000018451	6330403K07Rik	11	70922767	70924339	-	1573	-0.170619	8.35082	-1.9661	0.0693096	0.794381	-3.95942
ENSMUSG00000066640	Fbxl18	5	142852701	142881176	-	28476	0.0733633	5.81346	1.96394	0.0695814	0.794381	-3.96276
ENSMUSG00000044528	Tram1l1	3	124114504	124118392	+	3889	-0.101751	5.26561	-1.96365	0.0696186	0.794381	-3.96222
ENSMUSG00000013846	St3gal1	15	66974724	67048679	-	73956	-0.333856	5.37713	-1.96348	0.0696393	0.794381	-3.96234
ENSMUSG00000030298	Sec13	6	113705023	113717704	-	12682	-0.0903115	5.99262	-1.96298	0.0697037	0.794381	-3.96452
ENSMUSG00000042699	Dhx9	1	153331504	153363406	-	31903	-0.211019	7.17954	-1.96263	0.0697476	0.794381	-3.96518
ENSMUSG00000021497	Txndc15	13	55862463	55874040	+	11578	-0.071323	5.99171	-1.96232	0.0697863	0.794381	-3.96529
ENSMUSG00000028106	Rprd2	3	95667653	95726175	-	58523	-0.0983123	6.03005	-1.96216	0.0698074	0.794381	-3.96561
ENSMUSG00000002718	Cse1l	2	166747960	166788309	+	40350	-0.162378	6.00647	-1.96163	0.0698741	0.794381	-3.96617
ENSMUSG00000074872	Ctxn2	2	124978553	124989761	+	11209	-0.162157	3.85688	-1.96161	0.0698769	0.794381	-4.00195
ENSMUSG00000016619	Nup50	15	84807612	84827164	+	19553	-0.0900429	5.70125	-1.96149	0.0698919	0.794381	-3.96529
ENSMUSG00000034863	Ano8	8	71928663	71938607	-	9945	0.0997136	6.03264	1.96141	0.069902	0.794381	-3.96644
ENSMUSG00000041774	Ydjc	16	16962485	16978565	+	16081	0.129154	4.48595	1.96106	0.0699464	0.794381	-3.97452
ENSMUSG00000029120	Ppp2r2c	5	37025857	37112422	+	86566	0.0961495	9.47541	1.95993	0.0700903	0.794381	-3.96703
ENSMUSG00000056492	Adgrf5	17	43671342	43770448	+	99107	0.137297	5.9869	1.95992	0.070091	0.794381	-3.96804
ENSMUSG00000074939	Chrm5	2	112309516	112311114	-	1599	-0.470998	1.26234	-1.95956	0.0701365	0.794381	-4.261
ENSMUSG00000106981	Gm45495	5	53439152	53440851	+	1700	-0.160099	3.27761	-1.95764	0.0703818	0.794381	-4.05038
ENSMUSG00000030226	Lmo3	6	138339916	138558966	-	219051	0.193811	7.39145	1.95679	0.0704898	0.794381	-3.97155
ENSMUSG00000034041	Lyl1	8	85428078	85431569	+	3492	0.23714	1.46111	1.95676	0.0704946	0.794381	-4.24135
ENSMUSG00000027162	Lin7c	2	109721198	109731348	+	10151	-0.122159	6.209	-1.95641	0.0705391	0.794381	-3.97292
ENSMUSG00000104784	Gm42984	5	44383929	44400890	+	16962	-0.152548	3.71464	-1.9558	0.0706165	0.794381	-4.01674
ENSMUSG00000062929	Cfl2	12	54905594	54909662	-	4069	-0.114204	5.55789	-1.95555	0.0706493	0.794381	-3.97176
ENSMUSG00000025757	Hspa4l	3	40699814	40750538	+	50725	-0.156606	7.47551	-1.95475	0.0707508	0.794381	-3.97378
ENSMUSG00000034156	Tspoap1	11	87651367	87676754	+	25388	0.168209	8.6984	1.95463	0.070767	0.794381	-3.97243
ENSMUSG00000022426	Josd1	15	79558452	79572120	-	13669	0.0935255	6.81351	1.95418	0.070825	0.794381	-3.97582
ENSMUSG00000118668	Rps6ka4	19	6806578	6818004	-	11427	0.149738	5.67886	1.95411	0.0708335	0.794381	-3.97375
ENSMUSG00000102634	Gm38225	18	37085704	37086096	-	393	-0.433548	-1.72764	-1.95227	0.0710695	0.796138	-4.46887
ENSMUSG00000083621	Gm14586	X	51861219	51861626	-	408	0.550242	-1.08157	1.95095	0.0712406	0.797163	-4.44118
ENSMUSG00000021481	Zfp346	13	55253124	55282638	+	29515	0.0954005	6.02569	1.95025	0.071331	0.797285	-3.97958
ENSMUSG00000031700	Gpt2	8	86219205	86254189	+	34985	0.0880188	6.17179	1.9486	0.0715434	0.797719	-3.98198
ENSMUSG00000027710	Acad9	3	36120128	36147002	+	26875	-0.121022	4.70521	-1.9485	0.0715571	0.797719	-3.98295
ENSMUSG00000020241	Col6a2	10	76431596	76459464	-	27869	0.166723	4.70986	1.94708	0.0717413	0.797719	-3.98461
ENSMUSG00000015501	Hivep2	10	13841819	14027118	+	185300	0.134813	8.01505	1.94637	0.0718336	0.797719	-3.98251
ENSMUSG00000041205	Map6d1	16	20052053	20060108	-	8056	0.152546	6.06109	1.94634	0.0718366	0.797719	-3.98426
ENSMUSG00000032010	Usp2	9	43978318	44006924	+	28607	0.147724	6.35361	1.94626	0.0718472	0.797719	-3.98513
ENSMUSG00000045625	Pigz	16	31752669	31764864	+	12196	0.197649	2.86764	1.9449	0.072025	0.798808	-4.09936
ENSMUSG00000032180	Tmed1	9	21418849	21421548	-	2700	0.140312	4.00222	1.94341	0.0722194	0.799375	-4.01101
ENSMUSG00000032118	Fez1	9	36733160	36790220	+	57061	-0.0669607	8.2627	-1.94328	0.0722355	0.799375	-3.98572
ENSMUSG00000057672	Pkn1	8	84393165	84425808	-	32644	0.091535	6.50672	1.94124	0.072503	0.80145	-3.99128
ENSMUSG00000026036	Nif3l1	1	58484310	58520975	+	36666	-0.110353	4.56322	-1.94047	0.0726038	0.80168	-3.99392
ENSMUSG00000050875	Minar2	18	59195320	59210034	+	14715	-0.151821	6.03415	-1.93817	0.0729066	0.803736	-3.99388
ENSMUSG00000020528	Prpsap2	11	61620476	61652914	-	32439	-0.104996	5.77111	-1.93751	0.0729929	0.803736	-3.99348
ENSMUSG00000059412	Fxyd2	9	45310967	45321576	+	10610	0.159212	2.73452	1.93723	0.0730305	0.803736	-4.11769
ENSMUSG00000043702	Pde12	14	26381113	26391038	-	9926	-0.135647	4.08799	-1.93654	0.0731212	0.803852	-4.01317
ENSMUSG00000025421	Hdhd2	18	77031788	77063003	+	31216	-0.112691	4.83026	-1.93356	0.0735164	0.805992	-3.99756
ENSMUSG00000039740	Alg2	4	47465067	47474333	-	9267	-0.0871713	7.29031	-1.93308	0.0735799	0.805992	-3.99967
ENSMUSG00000021367	Edn1	13	42454952	42461466	+	6515	0.413494	2.06063	1.93202	0.0737209	0.805992	-4.19113
ENSMUSG00000048732	Klhl11	11	100353440	100363567	-	10128	-0.164807	4.72783	-1.93188	0.0737403	0.805992	-4.00041
ENSMUSG00000005683	Cs	10	128173603	128198348	+	24746	-0.0819625	8.28816	-1.93142	0.0738003	0.805992	-3.99927
ENSMUSG00000059263	Usp47	7	111622711	111710868	+	88158	-0.100672	6.96769	-1.93013	0.0739728	0.805992	-4.00402
ENSMUSG00000018740	Slc25a35	11	68858957	68865191	+	6235	0.16278	3.20753	1.92937	0.0740748	0.805992	-4.07956
ENSMUSG00000004187	Kifc2	15	76544058	76552396	+	8339	0.138184	8.99097	1.92913	0.0741072	0.805992	-4.00117
ENSMUSG00000026349	Ccnt2	1	127701901	127735798	+	33898	0.133223	6.59009	1.92794	0.0742652	0.805992	-4.00698
ENSMUSG00000075602	Ly6a	15	74866726	74869880	-	3155	0.235504	4.75294	1.92524	0.0746281	0.805992	-4.00744
ENSMUSG00000030737	Slco2b1	7	99307011	99360547	-	53537	0.120215	4.99524	1.92346	0.0748686	0.805992	-4.00767
ENSMUSG00000029772	Ahcyl2	6	29768010	29912309	+	144300	-0.0754912	7.54999	-1.92175	0.0750995	0.805992	-4.0121
ENSMUSG00000004902	Slc25a18	6	120750539	120771297	+	20759	-0.585918	4.88069	-1.92167	0.0751107	0.805992	-4.01019
ENSMUSG00000021113	Snapc1	12	74011255	74035740	+	24486	-0.107777	5.37468	-1.92148	0.0751355	0.805992	-4.01012
ENSMUSG00000045624	Esf1	2	139961803	140012484	-	50682	-0.142331	4.73521	-1.92074	0.0752366	0.805992	-4.01221
ENSMUSG00000057335	Cep170	1	176561219	176641633	-	80415	-0.118948	6.28571	-1.92048	0.0752713	0.805992	-4.01552
ENSMUSG00000026853	Crat	2	30290483	30305825	-	15343	0.0659207	6.1601	1.92045	0.0752753	0.805992	-4.01509
ENSMUSG00000042500	Ago4	4	126383334	126427265	-	43932	0.154487	4.59795	1.92004	0.0753311	0.805992	-4.01489
ENSMUSG00000036437	Npy1r	8	67149844	67159444	+	9601	-0.289215	4.12482	-1.91897	0.075477	0.805992	-4.02883
ENSMUSG00000024143	Rhoq	17	87270510	87307497	+	36988	-0.107708	5.64456	-1.91859	0.0755288	0.805992	-4.01472
ENSMUSG00000037892	Pcdh18	3	49697745	49711774	-	14030	-0.261455	3.17394	-1.91851	0.0755391	0.805992	-4.09063
ENSMUSG00000021076	Actr10	12	70984631	71011492	+	26862	-0.0716822	6.77507	-1.91828	0.0755706	0.805992	-4.01834
ENSMUSG00000009291	Pttg1ip	10	77417554	77434566	+	17013	0.102992	7.12293	1.91783	0.0756313	0.805992	-4.01799
ENSMUSG00000074909	Ranbp6	19	29785800	29790374	-	4575	-0.139555	5.53843	-1.91728	0.0757067	0.805992	-4.01564
ENSMUSG00000026499	Acbd3	1	180553608	180581769	+	28162	-0.083177	5.13116	-1.91726	0.0757101	0.805992	-4.01433
ENSMUSG00000086784	Isoc2a	7	4880152	4899972	+	19821	-0.105626	4.43832	-1.91662	0.0757961	0.805992	-4.02126
ENSMUSG00000035274	Tpbg	9	85724433	85729093	+	4661	-0.130824	4.74831	-1.9163	0.0758401	0.805992	-4.01682
ENSMUSG00000034255	Arhgap27	11	103222323	103254518	-	32196	0.154516	5.28747	1.91596	0.0758864	0.805992	-4.01603
ENSMUSG00000052921	Arhgef15	11	68833981	68848306	-	14326	0.140011	5.6165	1.91594	0.0758901	0.805992	-4.01754
ENSMUSG00000028756	Pink1	4	138040720	138053618	-	12899	0.108631	8.66902	1.91585	0.0759023	0.805992	-4.01641
ENSMUSG00000057561	Eif1a	18	46730768	46749523	+	18756	-0.0867585	5.24032	-1.91567	0.0759258	0.805992	-4.01625
ENSMUSG00000030310	Slc6a1	6	114259596	114294493	+	34898	-0.149769	9.12946	-1.91499	0.0760201	0.805992	-4.01691
ENSMUSG00000019975	Ikbip	10	90918802	90938469	+	19668	-0.105502	3.67631	-1.91448	0.0760888	0.805992	-4.05608
ENSMUSG00000042426	Dhx29	13	113063988	113105966	+	41979	-0.109398	5.18158	-1.9131	0.0762779	0.805992	-4.019
ENSMUSG00000027346	Gpcpd1	2	132371002	132429649	-	58648	0.197232	6.72783	1.91249	0.076362	0.805992	-4.02505
ENSMUSG00000051169	Rpusd3	6	113392280	113396301	-	4022	0.11958	3.08746	1.91164	0.0764791	0.805992	-4.1035
ENSMUSG00000002052	Supt6	11	78097572	78136813	-	39242	-0.0989018	7.91997	-1.91083	0.0765901	0.805992	-4.02365
ENSMUSG00000085586	Gm11613	11	97535010	97551193	-	16184	0.23416	4.39797	1.90852	0.07691	0.805992	-4.03077
ENSMUSG00000027889	Ampd2	3	107981378	107993967	-	12590	0.0948147	6.51689	1.90785	0.0770024	0.805992	-4.03065
ENSMUSG00000062284	Gm6030	16	45025463	45025852	+	390	0.423531	-0.0112925	1.9076	0.0770367	0.805992	-4.38894
ENSMUSG00000017167	Cntnap1	11	101061349	101081550	+	20202	0.167436	8.12416	1.9075	0.0770504	0.805992	-4.02694
ENSMUSG00000032340	Neo1	9	58781970	58943724	-	161755	-0.101603	7.03936	-1.90689	0.0771347	0.805992	-4.0311
ENSMUSG00000066838	Zfp772	7	7205116	7212997	-	7882	0.185644	3.99247	1.90602	0.0772564	0.805992	-4.047
ENSMUSG00000066607	Insyn1	9	58395886	58407063	+	11178	0.167042	7.65913	1.9056	0.0773141	0.805992	-4.03045
ENSMUSG00000116243	Gm49552	15	79394526	79396718	+	2193	0.321042	0.191291	1.90557	0.0773192	0.805992	-4.37502
ENSMUSG00000020435	Osbp2	11	3653731	3813903	-	160173	0.20161	6.50113	1.90441	0.0774801	0.805992	-4.03459
ENSMUSG00000001707	Eef1e1	13	38828183	38843034	-	14852	-0.113583	4.2507	-1.90388	0.0775532	0.805992	-4.03901
ENSMUSG00000086524	Pabpc1l2a	X	102110274	102110786	-	513	-0.288551	0.898667	-1.90333	0.0776302	0.805992	-4.31833
ENSMUSG00000082063	Gm12993	4	116731785	116732662	-	878	0.343091	0.588885	1.90297	0.0776801	0.805992	-4.34572
ENSMUSG00000051456	Hspb3	13	113799432	113800212	-	781	0.870064	-1.18144	1.90295	0.0776828	0.805992	-4.45577
ENSMUSG00000074252	Gm10654	8	71384049	71385681	+	1633	0.329627	1.42849	1.90277	0.0777086	0.805992	-4.26989
ENSMUSG00000022010	Tsc22d1	14	76652401	76745205	+	92805	-0.0833561	9.06147	-1.90245	0.0777526	0.805992	-4.03092
ENSMUSG00000032946	Rasgrp2	19	6449370	6465246	+	15877	0.327211	7.46612	1.90208	0.0778044	0.805992	-4.03515
ENSMUSG00000106321	Gm43674	3	22051842	22052632	-	791	0.468552	-0.977839	1.9018	0.0778444	0.805992	-4.4454
ENSMUSG00000052155	Acvr2a	2	48704121	48793281	+	89161	-0.200569	5.92905	-1.9014	0.0778996	0.805992	-4.03629
ENSMUSG00000032549	Rab6b	9	102988986	103062475	+	73490	0.0976795	9.91329	1.90111	0.0779407	0.805992	-4.03219
ENSMUSG00000034902	Pip5k1c	10	81128797	81155807	+	27011	0.13318	8.21219	1.90085	0.077977	0.805992	-4.03431
ENSMUSG00000031217	Efnb1	X	98179736	98192597	+	12862	-0.202024	3.67219	-1.89991	0.0781084	0.805992	-4.06919
ENSMUSG00000000340	Dbt	3	116306719	116343630	+	36912	-0.0910984	4.6623	-1.89977	0.0781285	0.805992	-4.03517
ENSMUSG00000071072	Ptges3	10	127894823	127913141	+	18319	-0.0940445	6.09302	-1.89875	0.0782711	0.805992	-4.04025
ENSMUSG00000031980	Agt	8	125283273	125296445	-	13173	-0.677841	2.9789	-1.89843	0.0783165	0.805992	-4.12374
ENSMUSG00000015176	Nolc1	19	46064302	46073969	+	9668	-0.0916843	6.28967	-1.89814	0.0783571	0.805992	-4.04172
ENSMUSG00000037149	Ddx1	12	13266974	13299214	-	32241	-0.089282	7.05528	-1.89781	0.0784041	0.805992	-4.04166
ENSMUSG00000053536	Cstf2t	19	31060237	31064469	+	4233	-0.100898	6.6398	-1.89685	0.078539	0.805992	-4.04365
ENSMUSG00000031551	Ido1	8	25074152	25087025	-	12874	0.338137	3.81486	1.89627	0.0786214	0.805992	-4.06524
ENSMUSG00000027297	Ltk	2	119581801	119590912	-	9112	0.159218	3.80283	1.89617	0.0786352	0.805992	-4.06538
ENSMUSG00000046897	Zfp740	15	102111684	102124041	+	12358	0.0892853	6.78784	1.89569	0.078702	0.805992	-4.04475
ENSMUSG00000033319	Fem1c	18	46634813	46659038	-	24226	-0.125141	5.18198	-1.89372	0.0789805	0.80605	-4.04053
ENSMUSG00000108197	Gm44214	6	86664805	86665410	-	606	0.363141	-0.00539341	1.89308	0.0790717	0.80605	-4.39213
ENSMUSG00000025227	Mfsd13a	19	46329560	46363691	+	34132	0.0915357	5.8993	1.89306	0.0790753	0.80605	-4.04568
ENSMUSG00000037624	Kcnk2	1	188940127	189134470	-	194344	0.176236	7.0367	1.89266	0.0791315	0.80605	-4.04762
ENSMUSG00000036882	Arhgap33	7	30221651	30234485	-	12835	0.114309	8.78641	1.89235	0.0791756	0.80605	-4.04262
ENSMUSG00000018189	Uchl5	1	143653010	143683204	+	30195	-0.123121	4.70276	-1.89225	0.0791901	0.80605	-4.04273
ENSMUSG00000027223	Mapk8ip1	2	92214021	92231608	-	17588	0.105782	8.90186	1.88855	0.0797159	0.809771	-4.04664
ENSMUSG00000114019	Gm47155	13	93547291	93549465	+	2175	0.143114	4.24745	1.88855	0.0797171	0.809771	-4.05442
ENSMUSG00000051373	Plpp7	2	31985540	32000832	+	15293	0.115141	5.016	1.88685	0.0799602	0.810855	-4.04766
ENSMUSG00000031302	Nlgn3	X	100342774	100369569	+	26796	0.166483	5.52579	1.88667	0.0799855	0.810855	-4.05031
ENSMUSG00000044197	Gpr146	5	139363452	139382170	+	18719	0.112555	5.34736	1.88594	0.0800895	0.811088	-4.04996
ENSMUSG00000031104	Rab33a	X	47608162	47619109	+	10948	0.0913576	4.214	1.88449	0.0802985	0.811381	-4.05928
ENSMUSG00000071234	Syndig1l	12	84724051	84745605	-	21555	0.294853	7.75739	1.88342	0.080452	0.811381	-4.0556
ENSMUSG00000024098	Twsg1	17	66228967	66258221	-	29255	-0.0865708	5.35452	-1.88217	0.0806323	0.811381	-4.05428
ENSMUSG00000108348	Gm42372	7	16717011	16722077	+	5067	-0.0880375	7.38611	-1.88177	0.0806901	0.811381	-4.059
ENSMUSG00000031972	Acta1	8	124618508	124621490	-	2983	0.242166	2.49066	1.88137	0.0807486	0.811381	-4.17846
ENSMUSG00000024639	Gnaq	19	16110195	16364827	+	254633	-0.086844	7.32112	-1.88079	0.0808315	0.811381	-4.0604
ENSMUSG00000116775	Gm49769	12	19484530	19485162	+	633	0.429309	-1.34737	1.87996	0.0809526	0.811381	-4.4656
ENSMUSG00000020720	Psmd12	11	107370310	107395188	+	24879	-0.0701626	6.00985	-1.87978	0.0809786	0.811381	-4.06182
ENSMUSG00000032712	Resf1	6	149210912	149237161	+	26250	-0.119224	3.91773	-1.87955	0.0810111	0.811381	-4.07463
ENSMUSG00000002844	Adprh	16	38264392	38273065	-	8674	-0.0967063	6.43002	-1.87929	0.081049	0.811381	-4.06406
ENSMUSG00000000416	Cttnbp2	6	18366477	18514842	-	148366	0.156316	7.8165	1.87915	0.0810694	0.811381	-4.06027
ENSMUSG00000019235	Rps6kl1	12	85182023	85198038	-	16016	0.0994095	5.6828	1.87901	0.0810895	0.811381	-4.06025
ENSMUSG00000006024	Napa	7	15832383	15851900	+	19518	0.0912323	7.96054	1.87623	0.0814939	0.812126	-4.06307
ENSMUSG00000055485	Soga1	2	156857719	156921174	-	63456	-0.134518	5.64711	-1.8748	0.0817022	0.812126	-4.06485
ENSMUSG00000029233	Srd5a3	5	76288118	76303351	+	15234	0.130307	4.1264	1.87416	0.081796	0.812126	-4.07199
ENSMUSG00000025232	Hexa	9	59446823	59472392	+	25570	-0.0851282	6.14618	-1.87321	0.0819344	0.812126	-4.07018
ENSMUSG00000078779	Zfp59	7	27538032	27555863	+	17832	-0.13528	3.43761	-1.87282	0.0819915	0.812126	-4.10721
ENSMUSG00000050538	B230217C12Rik	11	97731606	97734925	+	3320	-0.092149	5.20592	-1.87232	0.0820649	0.812126	-4.06431
ENSMUSG00000020149	Rab1a	11	20151432	20176856	+	25425	-0.0855638	7.19133	-1.87185	0.0821348	0.812126	-4.0713
ENSMUSG00000031652	N4bp1	8	87534788	87611886	-	77099	-0.0902489	6.62068	-1.87169	0.082158	0.812126	-4.07304
ENSMUSG00000025138	Sirt7	11	120509198	120516066	-	6869	0.106786	5.28431	1.87079	0.0822898	0.812126	-4.06645
ENSMUSG00000046785	Epm2aip1	9	111100997	111108161	+	7165	-0.135511	7.29051	-1.87049	0.0823348	0.812126	-4.07244
ENSMUSG00000039959	Hip1	5	135435385	135573974	-	138590	0.0849223	6.42878	1.8702	0.0823764	0.812126	-4.07453
ENSMUSG00000022973	Synj1	16	90732980	90808196	-	75217	-0.101313	8.63114	-1.86986	0.0824271	0.812126	-4.06814
ENSMUSG00000029361	Nos1	5	117919097	118096905	+	177809	-0.133397	6.90396	-1.86983	0.0824318	0.812126	-4.07472
ENSMUSG00000024982	Zdhhc6	19	55259723	55304464	-	44742	-0.104988	4.99903	-1.86912	0.0825361	0.812126	-4.0669
ENSMUSG00000027367	Stard7	2	127112138	127140852	+	28715	-0.0752423	7.016	-1.86894	0.0825631	0.812126	-4.07537
ENSMUSG00000017493	Igfbp4	11	98932070	98945218	+	13149	0.12961	6.37835	1.86762	0.0827574	0.812126	-4.07739
ENSMUSG00000052675	Zfp112	7	23811739	23827377	+	15639	0.117157	4.13503	1.86715	0.0828261	0.812126	-4.07842
ENSMUSG00000056537	Rlim	X	103000769	103024890	-	24122	-0.0898748	5.59414	-1.86669	0.0828945	0.812126	-4.0736
ENSMUSG00000000326	Comt	16	18225636	18245602	-	19967	0.0829416	6.98671	1.86642	0.0829341	0.812126	-4.07832
ENSMUSG00000035967	Ints6l	X	55500217	55553203	+	52987	0.185017	6.36485	1.86534	0.0830951	0.812126	-4.07995
ENSMUSG00000002006	Pdzd4	X	72836965	72868575	-	31611	0.0854533	7.72112	1.86513	0.0831253	0.812126	-4.07664
ENSMUSG00000030103	Bhlhe40	6	108637590	108643886	+	6297	0.16205	5.95539	1.86481	0.083173	0.812126	-4.07855
ENSMUSG00000000782	Tcf7	11	52143198	52174158	-	30961	0.174329	4.02207	1.86447	0.0832245	0.812126	-4.08479
ENSMUSG00000018395	Kif3a	11	53458206	53492794	+	34589	-0.12202	7.27935	-1.86425	0.0832559	0.812126	-4.07967
ENSMUSG00000028277	Ube2j1	4	33031416	33052363	+	20948	-0.0915676	6.3464	-1.86386	0.0833137	0.812126	-4.08181
ENSMUSG00000020257	Wdr82	9	106048127	106068338	+	20212	-0.0786161	7.22997	-1.86362	0.0833495	0.812126	-4.08062
ENSMUSG00000021223	Papln	12	83810408	83839156	+	28749	0.201004	4.49025	1.86009	0.0838758	0.812126	-4.07823
ENSMUSG00000010154	Spire2	8	124059452	124096254	+	36803	-0.140414	4.38957	-1.85982	0.0839169	0.812126	-4.07971
ENSMUSG00000037509	Arhgef4	1	34717269	34852390	+	135122	0.104002	8.04945	1.85917	0.0840133	0.812126	-4.08208
ENSMUSG00000059474	Mbtd1	11	93776678	93837811	+	61134	0.117372	5.18452	1.85898	0.0840432	0.812126	-4.07883
ENSMUSG00000022757	Tfg	16	56510695	56537813	-	27119	-0.0972516	5.7124	-1.85717	0.0843145	0.812126	-4.08547
ENSMUSG00000053093	Myh7	14	55208141	55232083	-	23943	-0.129005	4.66443	-1.85708	0.0843271	0.812126	-4.07981
ENSMUSG00000044534	Ackr2	9	121727421	121740140	+	12720	0.360657	2.81903	1.85643	0.0844255	0.812126	-4.16711
ENSMUSG00000090223	Pcp4	16	96268806	96326993	+	58188	0.235582	6.07462	1.85633	0.0844403	0.812126	-4.08899
ENSMUSG00000029577	Ube3b	5	114518668	114559230	+	40563	0.104325	7.08851	1.85611	0.0844738	0.812126	-4.08984
ENSMUSG00000057880	Abat	16	8331293	8439432	+	108140	-0.126792	9.58976	-1.8549	0.0846555	0.812126	-4.08241
ENSMUSG00000039844	Rapgef1	2	29509732	29630990	+	121259	0.0798443	7.55048	1.85435	0.0847382	0.812126	-4.08971
ENSMUSG00000019978	Epb41l2	10	25235696	25399417	+	163722	0.0969423	6.76767	1.85402	0.0847885	0.812126	-4.09326
ENSMUSG00000000168	Dlat	9	50545933	50571080	-	25148	-0.0716553	6.53482	-1.85347	0.0848712	0.812126	-4.09417
ENSMUSG00000047749	Zc3hav1l	6	38264331	38276194	-	11864	-0.129989	3.18638	-1.85319	0.0849135	0.812126	-4.14027
ENSMUSG00000027206	Cops2	2	125672224	125701059	-	28836	-0.138922	6.40832	-1.85295	0.0849508	0.812126	-4.09462
ENSMUSG00000045140	Pigw	11	84767141	84771111	-	3971	-0.191266	1.85364	-1.8525	0.0850183	0.812126	-4.25273
ENSMUSG00000024601	Isoc1	18	58792538	58813440	+	20903	-0.18308	5.84213	-1.85114	0.0852237	0.812126	-4.09351
ENSMUSG00000071265	1700086L19Rik	12	74331016	74342719	+	11704	-0.186398	5.1395	-1.84959	0.085459	0.812126	-4.08884
ENSMUSG00000030122	Ptms	6	124890644	124897066	-	6423	0.120944	8.80449	1.84904	0.0855429	0.812126	-4.09074
ENSMUSG00000009575	Cbx5	15	103099971	103148243	-	48273	-0.0904145	7.96251	-1.84857	0.0856147	0.812126	-4.0944
ENSMUSG00000117814	Gm50431	19	46869934	46871878	+	1945	0.162286	3.5733	1.84847	0.0856301	0.812126	-4.11973
ENSMUSG00000026519	Tmem63a	1	180769909	180802677	+	32769	0.109731	5.62603	1.84834	0.0856497	0.812126	-4.09454
ENSMUSG00000002205	Vrk3	7	44397837	44426939	+	29103	0.0913548	5.36572	1.84828	0.0856591	0.812126	-4.0921
ENSMUSG00000022889	Mrpl39	16	84514464	84532630	-	18167	-0.0801033	4.88193	-1.84804	0.0856962	0.812126	-4.08922
ENSMUSG00000046204	Pnma2	14	67148619	67158472	+	9854	-0.0764732	6.6174	-1.84782	0.0857287	0.812126	-4.10072
ENSMUSG00000057897	Camk2b	11	5919644	6016362	-	96719	0.141426	10.6003	1.8471	0.0858393	0.812126	-4.09006
ENSMUSG00000003575	Crtc1	8	70835005	70892229	-	57225	0.0798199	8.53647	1.84592	0.0860198	0.812126	-4.09513
ENSMUSG00000030138	Bms1	6	118360342	118396435	-	36094	-0.0964397	5.37964	-1.84551	0.0860816	0.812126	-4.09536
ENSMUSG00000037573	Tob1	11	94102280	94106321	+	4042	-0.144556	4.94065	-1.84548	0.0860868	0.812126	-4.09216
ENSMUSG00000039633	Lonrf1	8	36683218	36716670	-	33453	0.125811	5.05299	1.84505	0.0861528	0.812126	-4.09315
ENSMUSG00000061702	Tmem91	7	25368564	25374591	-	6028	-0.121773	5.77617	-1.84324	0.0864297	0.812126	-4.1019
ENSMUSG00000074781	Ube2n	10	95351007	95381519	+	30513	-0.0841045	7.0159	-1.84287	0.0864869	0.812126	-4.10547
ENSMUSG00000036964	Trim17	11	58845511	58863924	+	18414	0.119863	3.93196	1.8427	0.0865136	0.812126	-4.10817
ENSMUSG00000041577	Prelp	1	133838042	133849152	-	11111	-0.238757	4.25221	-1.84242	0.0865556	0.812126	-4.09937
ENSMUSG00000024055	Cyp4f13	17	33143662	33166376	-	22715	0.169009	3.91966	1.84208	0.0866077	0.812126	-4.10922
ENSMUSG00000031791	Tmem38a	8	73325899	73341126	+	15228	0.101246	6.91521	1.84169	0.0866685	0.812126	-4.10711
ENSMUSG00000018377	Vezf1	11	87959105	87975555	+	16451	-0.0958235	5.42484	-1.84052	0.0868488	0.812126	-4.10137
ENSMUSG00000031971	Ccsap	8	124567570	124586948	-	19379	0.172504	6.14248	1.8391	0.0870674	0.812126	-4.1093
ENSMUSG00000037455	Slc18b1	10	23672884	23703866	+	30983	-0.166279	4.42848	-1.83877	0.0871185	0.812126	-4.10027
ENSMUSG00000025223	Ldb1	19	46020009	46033653	-	13645	0.0856852	7.13785	1.83875	0.0871228	0.812126	-4.1096
ENSMUSG00000009741	Ubp1	9	113760002	113806270	+	46269	0.143945	6.70179	1.83755	0.0873088	0.812126	-4.11234
ENSMUSG00000022420	Dnal4	15	79645654	79662050	-	16397	0.102932	6.19071	1.8374	0.0873312	0.812126	-4.1116
ENSMUSG00000113702	Gm35558	12	110563042	110563540	-	499	0.516335	-1.7615	1.83681	0.0874232	0.812126	-4.48808
ENSMUSG00000045136	Tubb2b	13	34310731	34314449	-	3719	-0.130975	6.81929	-1.8366	0.0874547	0.812126	-4.11338
ENSMUSG00000052369	Tmem106c	15	97862081	97868156	+	6076	-0.130943	4.69411	-1.83522	0.0876702	0.812126	-4.10248
ENSMUSG00000038970	Lmtk2	5	144037254	144125022	+	87769	0.128089	7.69491	1.83379	0.0878932	0.812126	-4.11238
ENSMUSG00000040612	Ildr2	1	166081708	166144392	+	62685	-0.1828	6.85044	-1.83311	0.0879987	0.812126	-4.11733
ENSMUSG00000037754	Ppp1r16b	2	158507318	158608254	+	100937	0.162737	8.45733	1.83259	0.0880805	0.812126	-4.11025
ENSMUSG00000040414	Slc25a28	19	43652240	43663320	-	11081	0.0884648	5.73565	1.83244	0.0881036	0.812126	-4.11361
ENSMUSG00000079641	Rpl39	X	36346173	36349055	-	2883	0.0942347	6.29213	1.83189	0.0881888	0.812126	-4.11841
ENSMUSG00000020664	Dld	12	31381276	31401452	-	20177	-0.128591	6.69571	-1.83129	0.0882825	0.812126	-4.11975
ENSMUSG00000020810	Cygb	11	116536421	116545139	-	8719	0.184991	6.25156	1.83124	0.0882914	0.812126	-4.11887
ENSMUSG00000001416	Cct3	3	88204423	88229074	+	24652	-0.0951632	7.18753	-1.82953	0.0885586	0.812126	-4.11996
ENSMUSG00000055204	Ankrd17	5	90375025	90514436	-	139412	-0.119963	7.71837	-1.8289	0.0886583	0.812126	-4.11778
ENSMUSG00000024974	Smc3	19	53588829	53634264	+	45436	-0.127334	6.14411	-1.82821	0.0887657	0.812126	-4.12204
ENSMUSG00000037260	Hgsnat	8	26434481	26466781	-	32301	0.0989569	5.73143	1.82811	0.0887824	0.812126	-4.11844
ENSMUSG00000086782	E130102H24Rik	4	101203728	101213932	-	10205	0.191559	2.58946	1.82714	0.0889343	0.812126	-4.20469
ENSMUSG00000024507	Hsd17b4	18	50261268	50329336	+	68069	-0.0917198	6.10545	-1.82697	0.0889621	0.812126	-4.1232
ENSMUSG00000034361	Cpne2	8	95259618	95297159	+	37542	-0.160046	5.86612	-1.82596	0.0891203	0.812126	-4.12237
ENSMUSG00000097743	Gm16973	14	56933737	56938725	-	4989	0.191815	2.79798	1.82435	0.0893756	0.812126	-4.19042
ENSMUSG00000026696	Vamp4	1	162398084	162426653	+	28570	-0.093783	6.52683	-1.8236	0.0894937	0.812126	-4.12862
ENSMUSG00000035566	Pcdh17	14	84681003	84776442	+	95440	-0.147583	6.98145	-1.82358	0.0894978	0.812126	-4.12778
ENSMUSG00000090063	Dlx6os1	6	6820189	6871592	-	51404	-0.175062	5.1428	-1.82329	0.0895429	0.812126	-4.11749
ENSMUSG00000019429	Ffar3	7	30553755	30555603	-	1849	0.932555	-0.709521	1.82267	0.0896419	0.812126	-4.45032
ENSMUSG00000067121	Gm7027	7	101222667	101223528	-	862	0.260345	0.54855	1.8222	0.089716	0.812126	-4.37526
ENSMUSG00000021116	Eif2s1	12	78908593	78933784	+	25192	-0.0999504	5.23234	-1.82186	0.08977	0.812126	-4.11993
ENSMUSG00000098132	Rassf10	7	112553169	112556664	+	3496	-0.431038	1.05918	-1.82155	0.0898202	0.812126	-4.33664
ENSMUSG00000003778	Brd8	18	34731668	34757654	-	25987	-0.0993491	6.35944	-1.82099	0.0899095	0.812126	-4.13131
ENSMUSG00000039354	Smarcal1	1	72622410	72672293	+	49884	-0.11235	6.3086	-1.82094	0.0899173	0.812126	-4.13119
ENSMUSG00000002997	Prkar2b	12	32008475	32111295	-	102821	-0.140682	7.33039	-1.81905	0.0902185	0.812126	-4.13113
ENSMUSG00000027650	Tti1	2	157823723	157870353	-	46631	-0.0879538	5.04275	-1.81816	0.0903599	0.812126	-4.12211
ENSMUSG00000042626	Shc1	3	89325750	89337334	+	11585	0.16338	3.52188	1.81747	0.0904702	0.812126	-4.14855
ENSMUSG00000042763	Maneal	4	124749032	124755964	-	6933	0.0971439	6.23303	1.81722	0.0905098	0.812126	-4.13494
ENSMUSG00000022359	Wdyhv1	15	58004773	58022061	+	17289	0.119755	4.32091	1.81692	0.0905589	0.812126	-4.12327
ENSMUSG00000054428	Atpif1	4	132257866	132260970	-	3105	0.141275	6.49322	1.81577	0.0907433	0.812126	-4.13741
ENSMUSG00000030220	Arhgdib	6	136900653	136918897	-	18245	0.293636	4.40781	1.81569	0.090755	0.812126	-4.12371
ENSMUSG00000020734	Grin2c	11	115139995	115158069	-	18075	0.105336	6.13211	1.81546	0.0907929	0.812126	-4.13636
ENSMUSG00000031823	Zdhhc7	8	120807629	120828221	-	20593	0.0821842	5.37761	1.81393	0.0910376	0.812126	-4.1302
ENSMUSG00000045087	S1pr5	9	21154208	21159739	-	5532	0.154173	3.90374	1.81377	0.0910635	0.812126	-4.13556
ENSMUSG00000059995	Atxn7l3	11	102180126	102187457	-	7332	0.100244	7.79864	1.81332	0.0911364	0.812126	-4.13489
ENSMUSG00000038319	Kcnh2	5	24524587	24556602	-	32016	-0.152279	5.6059	-1.81297	0.0911937	0.812126	-4.13415
ENSMUSG00000022122	Ednrb	14	104052061	104081838	-	29778	-0.18022	5.54907	-1.81218	0.09132	0.812126	-4.13432
ENSMUSG00000020340	Cyfip2	11	46084677	46203686	-	119010	0.129798	9.97706	1.81136	0.0914525	0.812126	-4.12829
ENSMUSG00000035529	Prdm4	10	85727830	85753006	-	25177	0.0676163	5.45994	1.8112	0.0914789	0.812126	-4.13423
ENSMUSG00000029027	Dffb	4	154048906	154059583	-	10678	0.200479	3.60792	1.81098	0.0915147	0.812126	-4.14978
ENSMUSG00000029131	Dnajb6	5	29940686	30023132	+	82447	-0.0846681	6.56322	-1.80943	0.0917652	0.812126	-4.1449
ENSMUSG00000037703	Lzts3	2	130474759	130484723	-	9965	0.163479	9.23216	1.80908	0.0918215	0.812126	-4.13293
ENSMUSG00000020283	Pex13	11	23596479	23615959	-	19481	-0.105625	4.94721	-1.80823	0.0919592	0.812126	-4.13189
ENSMUSG00000041319	Thoc6	17	23887588	23892856	-	5269	-0.14986	2.48789	-1.80718	0.0921302	0.812126	-4.22489
ENSMUSG00000038697	Taf5l	8	124723057	124748136	-	25080	0.0995843	4.7203	1.80625	0.0922821	0.812126	-4.13252
ENSMUSG00000032356	Rasgrf1	9	89791961	89909030	+	117070	-0.0939448	9.02765	-1.80617	0.092295	0.812126	-4.13691
ENSMUSG00000022673	Mcm4	16	15441761	15455264	-	13504	-0.128739	4.09546	-1.80487	0.0925057	0.812126	-4.13846
ENSMUSG00000066510	Ankdd1a	9	65395752	65427475	-	31724	0.291263	4.17824	1.80446	0.0925741	0.812126	-4.13755
ENSMUSG00000025867	Cplx2	13	54519162	54531730	+	12569	0.129525	10.931	1.80419	0.0926176	0.812126	-4.13448
ENSMUSG00000087578	Ccdc142os	6	83083589	83086035	-	2447	-0.278132	0.470797	-1.80393	0.09266	0.812126	-4.38602
ENSMUSG00000050556	Kcnb1	2	166937889	167032075	-	94187	0.112011	8.11428	1.80381	0.0926792	0.812126	-4.14383
ENSMUSG00000094500	Smim18	8	34232140	34237798	-	5659	-0.139063	2.49559	-1.80368	0.0927011	0.812126	-4.22652
ENSMUSG00000059361	Nrsn2	2	152210675	152218558	-	7884	-0.120214	7.69388	-1.80358	0.0927175	0.812126	-4.14642
ENSMUSG00000005804	Bloc1s6	2	122580423	122591395	+	10973	-0.0877246	5.07903	-1.80342	0.0927429	0.812126	-4.13827
ENSMUSG00000031278	Acsl4	X	141100989	141173531	-	72543	-0.193284	5.46265	-1.80283	0.0928407	0.812126	-4.14359
ENSMUSG00000004849	Ap1s1	5	137063847	137074989	-	11143	0.123571	8.44689	1.80267	0.0928654	0.812126	-4.1434
ENSMUSG00000032652	Crebl2	6	134807117	134835894	+	28778	-0.0732674	5.81215	-1.8025	0.0928932	0.812126	-4.14829
ENSMUSG00000064284	Cdpf1	15	85691173	85695898	-	4726	0.111897	3.66829	1.80237	0.0929156	0.812126	-4.15433
ENSMUSG00000025544	Tm9sf2	14	122344450	122397016	+	52567	-0.162895	6.96416	-1.80196	0.0929824	0.812126	-4.15255
ENSMUSG00000018848	Rars	11	35699208	35725333	-	26126	-0.0737821	5.64442	-1.80103	0.0931352	0.812126	-4.14793
ENSMUSG00000014905	Dnajb9	12	44252342	44257109	-	4768	-0.139316	4.98338	-1.80007	0.0932929	0.812126	-4.14089
ENSMUSG00000064061	Dzip3	16	48744595	48814528	-	69934	-0.183664	6.5374	-1.80004	0.0932981	0.812126	-4.15563
ENSMUSG00000028876	Epha10	4	124774692	124811593	+	36902	0.250163	5.16972	1.79955	0.0933784	0.812126	-4.14324
ENSMUSG00000036208	Nepro	16	44544664	44557647	+	12984	-0.16068	2.81967	-1.79812	0.0936147	0.812126	-4.20653
ENSMUSG00000024846	Cst6	19	5394733	5399602	-	4870	0.150818	2.65633	1.79742	0.0937298	0.812126	-4.21905
ENSMUSG00000083695	Rnf138rt1	X	162543135	162544325	-	1191	-0.440953	0.433956	-1.79721	0.0937633	0.812126	-4.39083
ENSMUSG00000047473	Zfp30	7	29483423	29494127	+	10705	-0.137263	3.93071	-1.79717	0.0937715	0.812126	-4.1496
ENSMUSG00000036093	Arl5a	2	52287963	52314913	-	26951	-0.113417	6.00518	-1.79478	0.0941659	0.812126	-4.159
ENSMUSG00000022548	Apod	16	31115010	31133626	-	18617	0.145725	7.16654	1.79462	0.0941929	0.812126	-4.1597
ENSMUSG00000034226	Rhov	2	119099682	119101753	-	2072	-0.242487	2.69236	-1.79321	0.0944266	0.812126	-4.21883
ENSMUSG00000074212	Dnajb14	3	137573436	137622318	+	48883	-0.112601	6.7893	-1.79264	0.0945224	0.812126	-4.16378
ENSMUSG00000031376	Atp2b3	X	72546692	72614611	+	67920	-0.141228	6.88458	-1.79239	0.0945635	0.812126	-4.16376
ENSMUSG00000021371	Mcur1	13	43691869	43713667	-	21799	0.115411	4.31596	1.79183	0.0946561	0.812126	-4.14778
ENSMUSG00000036112	Metap2	10	93694351	93732955	-	38605	-0.10075	6.36319	-1.79106	0.0947842	0.812126	-4.16548
ENSMUSG00000056429	Tgoln1	6	72585415	72593983	-	8569	-0.0852492	7.50518	-1.79075	0.0948357	0.812126	-4.162
ENSMUSG00000028959	Fastk	5	24643438	24650285	-	6848	0.0776338	6.49637	1.79017	0.0949331	0.812126	-4.16668
ENSMUSG00000029392	Rilpl1	5	124631143	124669454	-	38312	0.0876765	5.39835	1.79014	0.0949388	0.812126	-4.15659
ENSMUSG00000066232	Ipo7	7	109617481	109655816	+	38336	-0.163837	6.91131	-1.78993	0.094973	0.812126	-4.16645
ENSMUSG00000023011	Faim2	15	99394893	99426046	-	31154	-0.185032	8.72725	-1.78943	0.0950564	0.812126	-4.15653
ENSMUSG00000020598	Nrcam	12	44375668	44648747	+	273080	-0.127031	8.24352	-1.78893	0.09514	0.812126	-4.15961
ENSMUSG00000051557	Pusl1	4	155972336	155976238	-	3903	0.0972639	4.16459	1.78831	0.0952451	0.812126	-4.1529
ENSMUSG00000079003	Samd1	8	84724130	84727038	+	2909	0.108551	4.78306	1.788	0.0952958	0.812126	-4.15173
ENSMUSG00000021552	Gkap1	13	58381160	58423513	-	42354	-0.190162	4.63538	-1.78689	0.0954823	0.812126	-4.15209
ENSMUSG00000032316	Clk3	9	57657907	57673143	-	15237	0.0814331	6.1585	1.78685	0.0954889	0.812126	-4.16905
ENSMUSG00000045034	Ankrd34b	13	92562404	92578166	+	15763	-0.221885	4.98495	-1.78636	0.0955715	0.812126	-4.15544
ENSMUSG00000033400	Agl	3	116533648	116601815	-	68168	-0.092882	5.58521	-1.78597	0.0956366	0.812126	-4.16388
ENSMUSG00000075289	Carns1	19	4214323	4225478	-	11156	0.17413	3.41914	1.78552	0.095712	0.812126	-4.17995
ENSMUSG00000032368	Zic1	9	91240111	91247863	-	7753	-0.332749	4.37383	-1.78537	0.0957384	0.812126	-4.15367
ENSMUSG00000108391	Gm9768	4	152091216	152094076	-	2861	0.235789	1.25575	1.78534	0.0957436	0.812126	-4.33587
ENSMUSG00000027394	Ttl	2	128907862	128938203	+	30342	0.109379	6.6653	1.78493	0.0958122	0.812126	-4.17262
ENSMUSG00000025730	Rab40c	17	26101088	26138701	-	37614	0.0752974	6.29177	1.78457	0.0958719	0.812126	-4.17242
ENSMUSG00000052962	Mrpl35	6	71789981	71803953	-	13973	-0.0755826	4.77212	-1.78455	0.0958767	0.812126	-4.1553
ENSMUSG00000044068	Zrsr1	11	22922005	22926496	+	4492	-0.0840219	6.27572	-1.78433	0.0959132	0.812126	-4.17276
ENSMUSG00000019996	Map7	10	20024217	20157336	+	133120	0.160893	7.43205	1.78331	0.0960854	0.812126	-4.17079
ENSMUSG00000052915	Msl1	11	98686342	98698685	+	12344	0.0990471	6.70149	1.7832	0.0961039	0.812126	-4.17454
ENSMUSG00000103603	Gm37020	1	37171354	37172345	-	992	-0.449702	-1.10273	-1.78308	0.0961244	0.812126	-4.47267
ENSMUSG00000041977	Arhgef11	3	87524866	87645341	+	120476	-0.111418	6.56927	-1.78307	0.0961249	0.812126	-4.17494
ENSMUSG00000022957	Itsn1	16	91526169	91717485	+	191317	-0.110164	7.45705	-1.78303	0.0961332	0.812126	-4.17099
ENSMUSG00000009216	Fam163b	2	27000392	27032503	-	32112	0.333416	6.43446	1.78302	0.0961335	0.812126	-4.17427
ENSMUSG00000056592	Zfp658	7	43211680	43224885	+	13206	-0.162148	3.16034	-1.78206	0.0962971	0.812126	-4.19629
ENSMUSG00000031715	Smarca5	8	81425136	81466126	-	40991	-0.133803	6.00423	-1.78191	0.0963212	0.812126	-4.17352
ENSMUSG00000030059	Tmf1	6	97129958	97156083	-	26126	-0.108033	5.11437	-1.78152	0.0963877	0.812126	-4.16215
ENSMUSG00000018076	Med13l	5	118698744	118903503	+	204760	0.0840587	7.07207	1.78122	0.0964385	0.812126	-4.17541
ENSMUSG00000042524	Sun2	15	79608271	79626737	-	18467	0.18864	6.71111	1.78117	0.0964475	0.812126	-4.17671
ENSMUSG00000030521	Mphosph10	7	64026275	64042016	-	15742	-0.110947	3.84417	-1.78116	0.0964483	0.812126	-4.16643
ENSMUSG00000003402	Prkcsh	9	21914102	21925518	+	11417	-0.0786472	6.48926	-1.78019	0.0966126	0.812126	-4.17812
ENSMUSG00000093460	Six3os1	17	85908079	85925826	-	17748	-0.142998	4.89736	-1.77986	0.096669	0.812126	-4.16133
ENSMUSG00000113216	Gm40841	13	28578436	28604049	-	25614	0.203904	4.60473	1.77876	0.0968557	0.812126	-4.16015
ENSMUSG00000026526	Fh1	1	175427940	175453201	-	25262	-0.0692835	6.48295	-1.77826	0.0969413	0.812126	-4.1803
ENSMUSG00000038545	Cul7	17	46961263	46975290	+	14028	-0.0952981	5.40189	-1.77748	0.097074	0.812126	-4.17057
ENSMUSG00000020684	Rasl10b	11	83299963	83311865	+	11903	0.110289	9.22738	1.77745	0.0970784	0.812126	-4.16698
ENSMUSG00000022698	Naa50	16	43960193	43983729	+	23537	-0.107536	5.56814	-1.7774	0.0970876	0.812126	-4.17311
ENSMUSG00000002661	Alkbh7	17	57304339	57306322	+	1984	-0.146633	3.6952	-1.77543	0.0974242	0.812126	-4.17624
ENSMUSG00000039414	Heatr5b	17	79060327	79142793	-	82467	-0.138501	6.23859	-1.77535	0.0974373	0.812126	-4.18273
ENSMUSG00000039254	Pomt1	2	32126602	32145017	+	18416	-0.120014	4.19236	-1.77462	0.0975618	0.812126	-4.16546
ENSMUSG00000031068	Glrx3	7	137039343	137070323	+	30981	-0.0648611	6.14899	-1.77452	0.0975797	0.812126	-4.18304
ENSMUSG00000032125	Robo4	9	37313193	37326411	+	13219	0.161919	3.42688	1.7744	0.0976001	0.812126	-4.18848
ENSMUSG00000027375	Mal	2	127475146	127498615	-	23470	0.125382	8.30392	1.77339	0.097772	0.812126	-4.17636
ENSMUSG00000020431	Adcy1	11	7013489	7128506	+	115018	0.28696	8.37719	1.772	0.098011	0.812126	-4.17743
ENSMUSG00000024359	Hspa9	18	35070467	35087410	-	16944	-0.0790142	7.93159	-1.77193	0.0980227	0.812126	-4.18021
ENSMUSG00000019923	Zwint	10	72490677	72510796	+	20120	-0.0805518	10.0191	-1.77163	0.0980739	0.812126	-4.16993
ENSMUSG00000006423	Steep1	X	36087390	36137764	-	50375	-0.0731946	5.36739	-1.77156	0.0980863	0.812126	-4.17649
ENSMUSG00000075273	Ttc30b	2	75766193	75768929	-	2737	-0.143083	3.96072	-1.77135	0.0981228	0.812126	-4.17227
ENSMUSG00000039345	Mettl22	16	8288652	8308548	+	19897	0.103188	4.67144	1.77124	0.0981413	0.812126	-4.16815
ENSMUSG00000015222	Map2	1	66214432	66481742	+	267311	-0.131829	10.1691	-1.77118	0.0981519	0.812126	-4.16993
ENSMUSG00000085565	Gm15721	5	147886692	147893976	-	7285	0.205911	2.02995	1.77111	0.0981636	0.812126	-4.2819
ENSMUSG00000026356	Dars	1	128291444	128345105	-	53662	-0.130414	5.76245	-1.7701	0.0983382	0.812126	-4.18393
ENSMUSG00000032553	Srprb	9	103065231	103079336	-	14106	-0.112475	5.33584	-1.76903	0.098523	0.812126	-4.17877
ENSMUSG00000049807	Arhgap23	11	97306359	97393228	+	86870	0.105126	7.01698	1.76903	0.0985233	0.812126	-4.18945
ENSMUSG00000007097	Atp1a2	1	172099276	172125631	-	26356	-0.106581	10.1002	-1.76834	0.0986423	0.812126	-4.1731
ENSMUSG00000042323	Pbrm1	14	30741095	30843549	+	102455	-0.139878	6.0434	-1.76775	0.0987434	0.812126	-4.1898
ENSMUSG00000085251	Gm12326	11	71630223	71631292	-	1070	0.352216	-0.439186	1.76733	0.0988168	0.812126	-4.44787
ENSMUSG00000047417	Rexo1	10	80376756	80397394	-	20639	0.0770815	6.09529	1.7669	0.0988914	0.812126	-4.19105
ENSMUSG00000037996	Slc24a2	4	86901361	87148714	-	247354	0.226733	8.74318	1.76662	0.0989397	0.812126	-4.18119
ENSMUSG00000044377	Gm13080	4	143338228	143338647	-	420	0.501517	-1.24155	1.76656	0.0989504	0.812126	-4.48136
ENSMUSG00000073415	Gm10501	17	35195875	35200764	-	4890	-0.118108	4.0627	-1.76433	0.0993363	0.812126	-4.1768
ENSMUSG00000005312	Ubqln1	13	58323970	58363467	-	39498	-0.0867978	7.48412	-1.76402	0.099391	0.812126	-4.19205
ENSMUSG00000108368	Gm45053	6	72579987	72582485	-	2499	0.260712	0.865346	1.76397	0.0993992	0.812126	-4.373
ENSMUSG00000004100	Ppan	9	20799471	20803474	+	4004	-0.12139	3.92752	-1.7639	0.0994117	0.812126	-4.17972
ENSMUSG00000002797	Ggct	6	54959565	54969935	-	10371	-0.0857016	3.95331	-1.76312	0.099547	0.812126	-4.17987
ENSMUSG00000029250	Polr2b	5	77457994	77497171	+	39178	-0.112685	6.35974	-1.76305	0.0995602	0.812126	-4.19719
ENSMUSG00000025498	Irf7	7	140842619	140846394	-	3776	0.691247	1.66166	1.76279	0.0996042	0.812126	-4.31656
ENSMUSG00000025739	Gng13	17	25936145	25938380	+	2236	0.235098	3.93556	1.76277	0.0996077	0.812126	-4.18082
ENSMUSG00000032459	Mrps22	9	98470783	98483713	-	12931	-0.0957988	4.23732	-1.76238	0.0996755	0.812126	-4.17667
ENSMUSG00000022110	Sucla2	14	73762759	73833582	+	70824	-0.0884013	7.09946	-1.76186	0.0997677	0.812126	-4.19715
ENSMUSG00000107451	Gm44421	6	90455448	90456668	+	1221	0.236673	1.66027	1.76185	0.0997692	0.812126	-4.31515
ENSMUSG00000039087	Rreb1	13	37962376	38135981	+	173606	-0.365868	6.38655	-1.76173	0.09979	0.812126	-4.19872
ENSMUSG00000058267	Mrps14	1	160022785	160029740	+	6956	-0.102314	4.93186	-1.76121	0.0998812	0.812126	-4.18125
ENSMUSG00000046201	Scaf8	17	3165247	3249134	+	83888	-0.101081	5.9683	-1.76111	0.0998986	0.812126	-4.19647
ENSMUSG00000062761	Zfp512	5	31609775	31639098	+	29324	-0.0964516	5.77643	-1.76108	0.0999034	0.812126	-4.19413
ENSMUSG00000104222	Gm7292	6	117693303	117695829	+	2527	-0.230471	0.777747	-1.76059	0.0999893	0.812126	-4.3798
ENSMUSG00000020634	Ubxn2a	12	4929032	4957705	-	28674	-0.0902906	5.31935	-1.75954	0.100172	0.812126	-4.18876
ENSMUSG00000034442	Trmt5	12	73326785	73333484	-	6700	-0.134239	3.41196	-1.75922	0.100228	0.812126	-4.20104
ENSMUSG00000056383	AI987944	7	41022347	41042803	-	20457	-0.121514	3.46645	-1.75922	0.100229	0.812126	-4.19867
ENSMUSG00000021546	Hnrnpk	13	58538956	58551157	-	12202	-0.101664	8.49337	-1.75835	0.10038	0.812126	-4.19166
ENSMUSG00000036371	Serbp1	6	67215160	67274720	+	59561	-0.0840238	7.42167	-1.75831	0.100388	0.812126	-4.19886
ENSMUSG00000031245	Hmgn5	X	108048140	108057010	-	8871	-0.249406	2.70515	-1.75826	0.100397	0.812126	-4.2412
ENSMUSG00000051671	Coa6	8	127149254	127152172	+	2919	-0.109711	3.81289	-1.75814	0.100417	0.812126	-4.1876
ENSMUSG00000058799	Nap1l1	10	111309084	111334011	+	24928	-0.130732	8.17078	-1.75797	0.100448	0.812126	-4.19406
ENSMUSG00000038402	Foxf2	13	31809799	31815386	+	5588	0.217622	2.30178	1.75794	0.100454	0.812126	-4.26949
ENSMUSG00000027067	Ssrp1	2	84867578	84877453	+	9876	-0.0862947	6.77437	-1.75748	0.100535	0.812126	-4.20361
ENSMUSG00000017344	Vtn	11	78389917	78393150	+	3234	0.122836	6.18756	1.75738	0.100551	0.812126	-4.20239
ENSMUSG00000020805	Slc13a5	11	72132815	72158048	-	25234	-0.144194	4.02937	-1.75705	0.10061	0.812126	-4.18402
ENSMUSG00000030662	Ipo5	14	121148636	121185411	+	36776	-0.0725317	6.9626	-1.75661	0.100687	0.812126	-4.20382
ENSMUSG00000007216	Zfp775	6	48578997	48600161	+	21165	0.130264	3.67714	1.75636	0.10073	0.812126	-4.19328
ENSMUSG00000067212	H2-T23	17	36340665	36343747	-	3083	0.146184	4.03221	1.75594	0.100806	0.812126	-4.18508
ENSMUSG00000020440	Arf5	6	28423559	28426601	+	3043	0.122017	6.66867	1.75522	0.100932	0.812126	-4.20618
ENSMUSG00000022055	Nefl	14	68321312	68326544	+	5233	-0.16416	8.03221	-1.75318	0.101292	0.812126	-4.2002
ENSMUSG00000020326	Ccng1	11	40639379	40646138	-	6760	-0.108293	5.53194	-1.75311	0.101304	0.812126	-4.19921
ENSMUSG00000042569	Dhrs7b	11	60721457	60751021	+	29565	-0.073094	4.6101	-1.75307	0.101311	0.812126	-4.18613
ENSMUSG00000003038	Hmgn2	4	133692049	133695961	-	3913	0.0950138	6.06992	1.75201	0.101498	0.812126	-4.20745
ENSMUSG00000018666	Cbx1	11	96679953	96699466	+	19514	-0.0779321	5.27347	-1.7519	0.101518	0.812126	-4.19624
ENSMUSG00000020828	Pld2	11	70430890	70448936	+	18047	0.0921804	5.0693	1.75096	0.101685	0.812126	-4.19385
ENSMUSG00000019433	Gipc1	8	84379306	84391323	+	12018	0.100647	5.7085	1.75083	0.101709	0.812126	-4.20432
ENSMUSG00000030754	Copb1	7	113814794	113853946	-	39153	-0.152206	6.27091	-1.75074	0.101725	0.812126	-4.21062
ENSMUSG00000024479	Mal2	15	54434588	54466243	+	31656	0.147592	6.56275	1.75069	0.101733	0.812126	-4.21127
ENSMUSG00000005609	Ctr9	7	110628158	110655584	+	27427	-0.104779	6.1214	-1.75047	0.101772	0.812126	-4.20986
ENSMUSG00000051067	Lingo3	10	80668635	80679873	-	11239	0.178779	7.44852	1.75035	0.101793	0.812126	-4.20746
ENSMUSG00000014243	Zswim7	11	62158050	62172201	-	14152	0.154876	3.97272	1.75031	0.1018	0.812126	-4.19117
ENSMUSG00000018537	Pcgf2	11	97579649	97591323	-	11675	0.143782	5.21406	1.75029	0.101804	0.812126	-4.19684
ENSMUSG00000032281	Acsbg1	9	54512161	54569154	-	56994	-0.0945945	7.40731	-1.75004	0.101849	0.812126	-4.20818
ENSMUSG00000055491	Pprc1	19	46033325	46061354	+	28030	-0.105815	4.94394	-1.74717	0.10236	0.812126	-4.19606
ENSMUSG00000020948	Klhl28	12	64985607	65012308	-	26702	-0.178998	4.31585	-1.74647	0.102485	0.812126	-4.19157
ENSMUSG00000039637	Coro7	16	4443997	4497641	-	53645	0.149088	7.21707	1.74638	0.102501	0.812126	-4.21355
ENSMUSG00000035390	Brsk1	7	4693603	4718996	+	25394	0.131828	8.43057	1.74576	0.102611	0.812126	-4.2057
ENSMUSG00000051232	Tmem199	11	78397881	78402998	-	5118	-0.0741785	5.47023	-1.74542	0.102673	0.812126	-4.20655
ENSMUSG00000031148	Gpkow	X	7563370	7576501	+	13132	-0.0582938	5.57578	-1.74471	0.1028	0.812126	-4.2091
ENSMUSG00000098912	1500004A13Rik	3	88690250	88739854	-	49605	-0.0727991	6.36682	-1.7444	0.102855	0.812126	-4.21816
ENSMUSG00000063273	Naa15	3	51322569	51383928	+	61360	-0.132092	5.85261	-1.74332	0.10305	0.812126	-4.21485
ENSMUSG00000004642	Slbp	5	33792296	33809918	-	17623	-0.10872	3.88171	-1.74287	0.10313	0.812126	-4.19944
ENSMUSG00000109868	Gm39244	8	109253569	109263853	-	10285	0.297931	2.47769	1.74281	0.103141	0.812126	-4.26681
ENSMUSG00000021890	Eaf1	14	31216356	31231815	+	15460	-0.0954015	5.08596	-1.74262	0.103174	0.812126	-4.20302
ENSMUSG00000003363	Pld3	7	27231425	27252643	-	21219	0.158415	9.24465	1.74254	0.10319	0.812126	-4.20408
ENSMUSG00000022044	Stmn4	14	66581745	66599129	+	17385	0.122608	7.33345	1.74231	0.10323	0.812126	-4.21726
ENSMUSG00000022571	Pycrl	15	75788326	75793409	-	5084	-0.148954	4.13664	-1.74151	0.103374	0.812126	-4.19707
ENSMUSG00000012296	Tjap1	17	46568777	46593952	-	25176	0.127341	4.60614	1.74151	0.103375	0.812126	-4.19761
ENSMUSG00000061559	Wdr61	9	54622019	54641803	-	19785	-0.0870596	5.2533	-1.7413	0.103412	0.812126	-4.20725
ENSMUSG00000040649	Rimklb	6	122424255	122475720	-	51466	-0.156408	5.18858	-1.74128	0.103416	0.812126	-4.20616
ENSMUSG00000031762	Mt2	8	94899292	94900196	+	905	0.179486	6.41458	1.74118	0.103433	0.812126	-4.22163
ENSMUSG00000020886	Dlg4	11	69907768	69938348	+	30581	0.0949873	9.78512	1.74045	0.103565	0.812126	-4.20341
ENSMUSG00000035863	Palm	10	79629406	79656730	+	27325	0.0949691	8.38627	1.74011	0.103628	0.812126	-4.21212
ENSMUSG00000005813	Metap1	3	138164717	138195276	-	30560	-0.0836757	5.49277	-1.73945	0.103746	0.812126	-4.21342
ENSMUSG00000044345	Marveld1	19	42135839	42140142	+	4304	0.12911	3.62294	1.73923	0.103786	0.812126	-4.20946
ENSMUSG00000067215	Usp51	X	151789465	151792412	+	2948	-0.416447	0.51372	-1.7386	0.103899	0.812126	-4.40423
ENSMUSG00000032525	Nktr	9	121548235	121585909	+	37675	0.166363	7.32505	1.73839	0.103938	0.812126	-4.22165
ENSMUSG00000028645	Slc2a1	4	118965908	118995180	+	29273	0.185145	6.85136	1.73753	0.104094	0.812126	-4.22546
ENSMUSG00000055202	Zfp811	17	33014650	33028905	-	14256	-0.173751	3.72059	-1.73728	0.104139	0.812126	-4.20812
ENSMUSG00000022565	Plec	15	76055174	76116774	-	61601	0.144398	7.92363	1.73716	0.10416	0.812126	-4.21851
ENSMUSG00000050052	Tdrp	8	14002008	14025032	-	23025	0.130841	5.51585	1.73694	0.1042	0.812126	-4.21637
ENSMUSG00000087056	Gm14004	2	124966276	124976247	-	9972	-0.226749	3.09932	-1.73664	0.104254	0.812126	-4.23346
ENSMUSG00000028567	Txndc12	4	108691798	108719324	+	27527	-0.0738617	4.81429	-1.73645	0.104289	0.812126	-4.20525
ENSMUSG00000022601	Zbtb11	16	55794246	55829276	+	35031	-0.112471	5.76487	-1.73598	0.104375	0.812126	-4.2217
ENSMUSG00000040441	Slc26a10	10	127007262	127016514	-	9253	0.312323	3.70571	1.73591	0.104387	0.812126	-4.21003
ENSMUSG00000040943	Tet2	3	133169440	133250900	-	81461	0.135597	5.85668	1.73523	0.10451	0.812126	-4.22359
ENSMUSG00000063171	Rps4l	6	148256154	148257096	+	943	0.192658	3.99681	1.73478	0.104593	0.812126	-4.20486
ENSMUSG00000113606	Gm47441	12	23953254	23953370	+	117	0.637006	-1.6136	1.73428	0.104683	0.812126	-4.49915
ENSMUSG00000032936	Camkv	9	107812873	107826890	+	14018	0.113359	10.0542	1.73425	0.104689	0.812126	-4.20861
ENSMUSG00000002455	Prpf6	2	181233661	181297453	+	63793	-0.0964858	6.42588	-1.73406	0.104723	0.812126	-4.22994
ENSMUSG00000018507	Trpv2	11	62465312	62491341	+	26030	-0.128288	3.9443	-1.73368	0.104793	0.812126	-4.20649
ENSMUSG00000003549	Ercc1	7	19078703	19090449	+	11747	0.114923	4.62216	1.73359	0.104809	0.812126	-4.20568
ENSMUSG00000023921	Mmut	17	41245576	41272879	+	27304	-0.114324	5.66746	-1.73355	0.104817	0.812126	-4.22283
ENSMUSG00000032101	Ddx25	9	35447943	35469824	-	21882	-0.107105	5.67545	-1.73153	0.105185	0.813411	-4.22516
ENSMUSG00000038886	Man2a2	7	79998845	80021123	-	22279	0.0856768	8.60178	1.73139	0.105211	0.813411	-4.22008
ENSMUSG00000039194	Rlbp1	7	79024618	79036796	-	12179	0.229973	3.72495	1.73131	0.105226	0.813411	-4.21334
ENSMUSG00000073700	Klhl21	4	152093260	152102137	+	8878	-0.117099	4.5508	-1.7307	0.105338	0.813457	-4.20795
ENSMUSG00000023067	Cdkn1a	17	29309950	29319701	+	9752	0.132627	4.284	1.73022	0.105426	0.813457	-4.20711
ENSMUSG00000072582	Ptrh2	11	86574811	86583283	+	8473	-0.116876	3.78098	-1.72995	0.105475	0.813457	-4.2129
ENSMUSG00000024014	Pim1	17	29709727	29715086	+	5360	-0.227305	1.50689	-1.7292	0.105612	0.813882	-4.34106
ENSMUSG00000033805	Ephx4	5	107550602	107577901	+	27300	0.151514	5.53298	1.72791	0.105849	0.815088	-4.22643
ENSMUSG00000006127	Inpp5k	11	75521814	75539697	+	17884	0.0972433	5.81421	1.72562	0.10627	0.817701	-4.23362
ENSMUSG00000061684	Rpl21-ps8	18	82541664	82542146	-	483	0.47781	-0.966795	1.72457	0.106464	0.818433	-4.479
ENSMUSG00000028005	Gucy1b1	3	81939313	81981996	-	42684	-0.16857	8.10949	-1.72423	0.106528	0.818433	-4.23125
ENSMUSG00000075702	Selenom	11	3464684	3467351	+	2668	0.190403	6.06451	1.72323	0.106712	0.818951	-4.23921
ENSMUSG00000028896	Rcc1	4	132059230	132080916	-	21687	-0.101792	3.97436	-1.72269	0.106812	0.818951	-4.21591
ENSMUSG00000037003	Tns2	15	102008848	102024836	+	15989	0.142469	4.86041	1.72235	0.106876	0.818951	-4.22022
ENSMUSG00000053062	Jam2	16	84571011	84622816	+	51806	-0.0968913	5.78686	-1.72193	0.106953	0.818951	-4.23745
ENSMUSG00000057156	Homez	14	55090193	55108418	-	18226	-0.0917951	4.09645	-1.72144	0.107044	0.818951	-4.2159
ENSMUSG00000022529	Zfp263	16	3561957	3568654	+	6698	0.110488	4.94285	1.72122	0.107086	0.818951	-4.22282
ENSMUSG00000060260	Pwwp2b	7	138828398	138849819	+	21422	0.219479	5.3642	1.71993	0.107325	0.818962	-4.23183
ENSMUSG00000032589	Bsn	9	107973221	108067583	-	94363	0.142556	8.6248	1.71976	0.107357	0.818962	-4.23238
ENSMUSG00000031711	Zfp330	8	83490236	83500789	-	10554	-0.0799238	4.7414	-1.71967	0.107373	0.818962	-4.2213
ENSMUSG00000025237	Parp6	9	59524567	59557568	+	33002	0.0731072	7.21893	1.71896	0.107505	0.818962	-4.244
ENSMUSG00000001127	Araf	X	20664053	20726758	+	62706	-0.0703759	7.64707	-1.71874	0.107547	0.818962	-4.2408
ENSMUSG00000028796	Phc2	4	128548495	128646674	+	98180	0.0723524	7.13736	1.71858	0.107578	0.818962	-4.24504
ENSMUSG00000038286	Bphl	13	34221580	34258057	+	36478	-0.0762722	5.2279	-1.71744	0.10779	0.81933	-4.23215
ENSMUSG00000053436	Mapk14	17	28910303	28967380	+	57078	0.0694464	7.01345	1.71696	0.10788	0.81933	-4.24766
ENSMUSG00000031827	Cotl1	8	120535961	120567283	-	31323	-0.174554	6.12614	-1.71619	0.108024	0.81933	-4.24806
ENSMUSG00000049892	Rasd1	11	59854007	59855770	-	1764	-0.381638	2.14704	-1.71585	0.108087	0.81933	-4.30365
ENSMUSG00000033629	Hacd3	9	64894265	64928975	-	34711	-0.0788602	7.46667	-1.71584	0.108088	0.81933	-4.24548
ENSMUSG00000046480	Scn4b	9	45049693	45065450	+	15758	0.32706	10.3372	1.71569	0.108116	0.81933	-4.22637
ENSMUSG00000044881	Coa4	7	100186278	100189576	+	3299	-0.173845	1.1627	-1.71497	0.108252	0.81974	-4.37091
ENSMUSG00000028443	Nudt2	4	41465151	41480926	+	15776	-0.0898695	3.98812	-1.71375	0.108481	0.820369	-4.22377
ENSMUSG00000096974	Gm26881	4	43045966	43053254	+	7289	0.185306	2.28761	1.71366	0.108499	0.820369	-4.29607
ENSMUSG00000034484	Snx2	18	53309388	53353937	+	44550	-0.0918817	6.18723	-1.713	0.108622	0.820685	-4.25209
ENSMUSG00000032940	Rbm11	16	75389732	75399717	+	9986	-0.187224	2.94105	-1.71198	0.108813	0.821509	-4.25916
ENSMUSG00000037280	Galnt6	15	100589694	100627257	-	37564	0.116589	4.59262	1.71139	0.108926	0.821607	-4.2274
ENSMUSG00000029603	Dtx1	5	120818267	120849992	-	31726	-0.136822	6.28682	-1.71104	0.10899	0.821607	-4.25496
ENSMUSG00000041688	Amot	X	144229421	144288177	-	58757	-0.128536	4.97288	-1.71016	0.109158	0.822246	-4.23494
ENSMUSG00000082286	Pisd-ps1	11	3075904	3081004	+	5101	0.173722	4.54074	1.70973	0.109239	0.822246	-4.22838
ENSMUSG00000117003	Gm49937	17	66756849	66759594	+	2746	0.17764	1.24741	1.70806	0.109554	0.823609	-4.36843
ENSMUSG00000038936	Sccpdh	1	179495775	179514754	+	18980	-0.122917	5.72284	-1.7079	0.109585	0.823609	-4.25173
ENSMUSG00000038900	Rpl12	2	32851571	32855357	+	3787	0.122959	7.32277	1.70709	0.109738	0.824143	-4.25623
ENSMUSG00000026869	Psmd5	2	34739746	34764980	-	25235	-0.0715897	5.92847	-1.70639	0.109872	0.824535	-4.25655
ENSMUSG00000038074	Fkbp14	6	54554589	54574293	-	19705	-0.128531	3.60385	-1.7055	0.110041	0.824997	-4.23787
ENSMUSG00000075707	Dio3	12	110245502	110247531	+	2030	-0.435116	2.10407	-1.7052	0.110098	0.824997	-4.31254
ENSMUSG00000038055	Dexi	16	10320395	10360918	-	40524	0.0664601	5.75231	1.70452	0.110228	0.825352	-4.25576
ENSMUSG00000020397	Med7	11	46327752	46333548	+	5797	-0.127433	3.7838	-1.70318	0.110482	0.826637	-4.23587
ENSMUSG00000030905	Crym	7	119785603	119801334	-	15732	-0.109967	8.78995	-1.69949	0.111189	0.831304	-4.25277
ENSMUSG00000056069	Otulinl	15	27655155	27681665	-	26511	0.184164	5.26485	1.69905	0.111273	0.831312	-4.25207
ENSMUSG00000028803	Nipal3	4	135172731	135222349	-	49619	0.0894018	7.51313	1.69798	0.11148	0.83218	-4.2646
ENSMUSG00000109715	Gm45606	11	75421103	75423897	-	2795	0.176868	3.08015	1.69759	0.111555	0.83218	-4.26303
ENSMUSG00000110279	Gm45552	7	44771341	44773568	+	2228	-0.260609	2.25543	-1.69608	0.111845	0.833722	-4.30776
ENSMUSG00000031683	Lsm6	8	79531494	79547769	-	16276	-0.0899182	5.40761	-1.69538	0.11198	0.83406	-4.25917
ENSMUSG00000062372	Otof	5	30524406	30619276	-	94871	-0.283774	6.07699	-1.69499	0.112057	0.83406	-4.27089
ENSMUSG00000051617	Krt9	11	100077607	100084072	-	6466	-0.136669	5.5283	-1.69321	0.112401	0.836002	-4.26397
ENSMUSG00000007610	Gtpbp3	8	71940747	71952227	+	11481	0.0802441	4.99553	1.69195	0.112644	0.83701	-4.25399
ENSMUSG00000021577	Sdha	13	74470373	74498399	-	28027	-0.0630338	8.90106	-1.69128	0.112775	0.83701	-4.26057
ENSMUSG00000025995	Wdr75	1	45834326	45862779	+	28454	-0.133528	5.43834	-1.69099	0.112831	0.83701	-4.26449
ENSMUSG00000026229	Psmd1	1	85992109	86066873	+	74765	-0.128745	6.9516	-1.69079	0.11287	0.83701	-4.27706
ENSMUSG00000031311	Nono	X	100472924	100492197	+	19274	-0.0703648	7.1768	-1.68937	0.113147	0.837487	-4.27696
ENSMUSG00000030541	Idh2	7	79744594	79765140	-	20547	-0.127723	5.49811	-1.68802	0.113409	0.837487	-4.2689
ENSMUSG00000044708	Kcnj10	1	172168777	172201652	+	32876	-0.155602	7.47451	-1.68694	0.113621	0.837487	-4.277
ENSMUSG00000029151	Slc30a3	5	31243450	31265581	-	22132	1.36341	2.96553	1.68614	0.113777	0.837487	-4.28324
ENSMUSG00000035325	Sec31a	5	100509508	100564093	-	54586	-0.0749041	6.95636	-1.68557	0.113889	0.837487	-4.28274
ENSMUSG00000105243	Gm43444	3	120814135	120814425	-	291	-0.403608	-1.37946	-1.68535	0.113933	0.837487	-4.49913
ENSMUSG00000036114	Rpp25l	4	41712033	41713534	-	1502	-0.142385	3.86156	-1.68506	0.11399	0.837487	-4.25039
ENSMUSG00000027533	Fabp5	3	10077608	10081667	+	4060	0.0972304	6.30204	1.68501	0.113999	0.837487	-4.28355
ENSMUSG00000032437	Stt3b	9	115071649	115139489	-	67841	-0.0803697	6.49903	-1.68408	0.114182	0.837487	-4.28552
ENSMUSG00000040463	Mybbp1a	11	72332181	72342594	+	10414	-0.0772383	6.1469	-1.68375	0.114246	0.837487	-4.28391
ENSMUSG00000045211	Nudt18	14	70815077	70820128	+	5052	0.119811	5.32741	1.68345	0.114307	0.837487	-4.26995
ENSMUSG00000097023	Mir9-3hg	7	79149774	79184151	+	34378	0.159252	5.96971	1.68313	0.114368	0.837487	-4.2822
ENSMUSG00000003134	Tbc1d8	1	39410573	39517836	-	107264	0.23874	6.96133	1.68293	0.114408	0.837487	-4.28525
ENSMUSG00000022561	Gpaa1	15	76215431	76219107	+	3677	-0.106889	5.26367	-1.68209	0.114573	0.837487	-4.27014
ENSMUSG00000021902	Phf7	14	30959646	30973274	-	13629	0.159327	2.85934	1.68046	0.114895	0.837487	-4.28503
ENSMUSG00000035245	Eogt	6	97086985	97126143	-	39159	0.11284	5.70362	1.67999	0.114988	0.837487	-4.28137
ENSMUSG00000021097	Clmn	12	104729376	104831335	-	101960	-0.102249	6.67164	-1.67997	0.114993	0.837487	-4.29007
ENSMUSG00000031328	Flna	X	73267067	73293426	-	26360	0.162219	6.91573	1.67913	0.115159	0.837487	-4.28979
ENSMUSG00000041354	Rgl2	17	34148517	34156661	+	8145	0.140201	5.63672	1.67882	0.115219	0.837487	-4.28131
ENSMUSG00000025921	Rdh10	1	16175998	16203958	+	27961	-0.127724	4.06391	-1.67875	0.115234	0.837487	-4.25481
ENSMUSG00000031239	Itm2a	X	106440705	106446982	-	6278	0.0847527	5.80567	1.67755	0.11547	0.837487	-4.28587
ENSMUSG00000048148	Nwd1	8	73373339	73444504	+	71166	-0.122281	6.99681	-1.67732	0.115517	0.837487	-4.29154
ENSMUSG00000046718	Bst2	8	71986899	71990100	-	3202	0.299485	1.50437	1.67685	0.115611	0.837487	-4.36557
ENSMUSG00000003346	Abhd17a	10	80419488	80426175	-	6688	0.143789	6.82843	1.67622	0.115736	0.837487	-4.29345
ENSMUSG00000024474	Ik	18	36877709	36890692	+	12984	-0.0772388	6.85222	-1.67619	0.115742	0.837487	-4.2936
ENSMUSG00000011877	Git1	11	77384388	77398612	+	14225	0.131934	8.5377	1.67596	0.115787	0.837487	-4.27964
ENSMUSG00000003316	Glg1	8	111881053	111985848	-	104796	-0.0871445	8.32152	-1.67596	0.115788	0.837487	-4.28145
ENSMUSG00000068039	Tcp1	17	13134588	13143954	+	9367	-0.0847141	7.8375	-1.6758	0.11582	0.837487	-4.28574
ENSMUSG00000029227	Fip1l1	5	74696110	74759461	+	63352	-0.0809871	6.10109	-1.67557	0.115864	0.837487	-4.2924
ENSMUSG00000039199	Zdhhc1	8	106199055	106223534	-	24480	0.120048	5.92048	1.6753	0.115919	0.837487	-4.29007
ENSMUSG00000037679	Inf2	12	112555218	112581991	+	26774	0.171015	9.0479	1.67367	0.116243	0.837487	-4.27781
ENSMUSG00000040740	Slc25a34	4	141346135	141351132	-	4998	-0.127537	4.24546	-1.67358	0.116261	0.837487	-4.26017
ENSMUSG00000031906	Smpd3	8	106979180	107064620	-	85441	0.188629	8.13236	1.67319	0.11634	0.837487	-4.28598
ENSMUSG00000003345	Csnk1g2	10	80458672	80476583	+	17912	0.144836	7.11205	1.67291	0.116395	0.837487	-4.2953
ENSMUSG00000028785	Hpca	4	129005363	129015829	-	10467	0.209944	10.2924	1.67274	0.116428	0.837487	-4.27003
ENSMUSG00000040549	Ckap5	2	91357107	91451009	+	93903	-0.125666	7.59979	-1.67271	0.116435	0.837487	-4.29124
ENSMUSG00000021892	Sh3bp5	14	31081837	31158035	-	76199	-0.0920849	5.51597	-1.67182	0.116613	0.837487	-4.28654
ENSMUSG00000036537	Rnf113a1	X	36454898	36456120	+	1223	-0.160834	2.63199	-1.67182	0.116614	0.837487	-4.30151
ENSMUSG00000046378	Asphd1	7	126544739	126548754	-	4016	-0.0787272	5.09738	-1.67177	0.116623	0.837487	-4.27713
ENSMUSG00000118521	Gm52948	2	84406895	84423184	-	16290	0.155498	3.08906	1.67152	0.116672	0.837487	-4.28135
ENSMUSG00000053286	Trmt1l	1	151304293	151333912	+	29620	-0.0906705	5.12981	-1.67139	0.1167	0.837487	-4.27827
ENSMUSG00000018707	Dync1h1	12	110567886	110633379	+	65494	-0.105929	9.5324	-1.67063	0.116851	0.837487	-4.27718
ENSMUSG00000021374	Nup153	13	46833381	46881416	-	48036	-0.128611	6.02264	-1.67044	0.116889	0.837487	-4.29707
ENSMUSG00000002265	Peg3	7	6706891	6733430	-	26540	-0.130404	8.91197	-1.67019	0.11694	0.837487	-4.2826
ENSMUSG00000027408	Cpxm1	2	130232695	130239494	-	6800	0.17524	2.94871	1.66993	0.116992	0.837487	-4.28826
ENSMUSG00000029363	Rfc5	5	117516168	117527112	-	10945	0.138443	3.84869	1.66989	0.116999	0.837487	-4.26364
ENSMUSG00000032757	Bet1	6	4076899	4086972	-	10074	-0.127749	4.17698	-1.66972	0.117034	0.837487	-4.26328
ENSMUSG00000063253	Scoc	8	84156713	84185020	-	28308	-0.132684	6.50567	-1.66952	0.117075	0.837487	-4.30155
ENSMUSG00000037649	H2-DMa	17	34338515	34358075	+	19561	0.108247	4.77784	1.66928	0.117122	0.837487	-4.27239
ENSMUSG00000046854	Pip5kl1	2	32464809	32473794	+	8986	0.156318	2.22628	1.66887	0.117206	0.837487	-4.32534
ENSMUSG00000087088	Gm16638	7	83246256	83281088	-	34833	-0.166441	5.02219	-1.66877	0.117224	0.837487	-4.27851
ENSMUSG00000110649	Gm40466	8	20576700	20584337	+	7638	0.223335	1.98397	1.66803	0.117374	0.837487	-4.33995
ENSMUSG00000025400	Tac2	10	127560347	127567637	+	7291	-0.49756	2.76017	-1.66726	0.11753	0.837487	-4.29859
ENSMUSG00000009894	Snap47	11	59297960	59342012	-	44053	-0.0937689	8.11566	-1.6668	0.117621	0.837487	-4.29292
ENSMUSG00000024642	Tle4	19	14425514	14575415	-	149902	-0.112729	6.96205	-1.66625	0.117732	0.837487	-4.30386
ENSMUSG00000023911	Flywch2	17	23995890	24005055	-	9166	0.136083	3.71071	1.66582	0.117819	0.837487	-4.26869
ENSMUSG00000029458	Brap	5	121798626	121825319	+	26694	0.0659462	6.12121	1.66548	0.117887	0.837487	-4.30341
ENSMUSG00000024201	Kdm4b	17	56633062	56709870	+	76809	0.139628	7.04942	1.66517	0.11795	0.837487	-4.30421
ENSMUSG00000027811	4930579G24Rik	3	79536386	79540127	+	3742	0.244601	0.957212	1.66416	0.118154	0.837487	-4.40364
ENSMUSG00000070080	Mir431	12	109556881	109556971	+	91	0.457668	-0.932683	1.6638	0.118228	0.837487	-4.48926
ENSMUSG00000012429	Mplkip	13	17869777	17874333	+	4557	-0.153753	3.35297	-1.66338	0.118312	0.837487	-4.27826
ENSMUSG00000047181	Samd14	11	94900705	94916913	+	16209	-0.242207	6.08715	-1.66293	0.118403	0.837487	-4.30601
ENSMUSG00000053046	Brsk2	7	141503488	141557984	+	54497	0.0676128	7.28375	1.66285	0.118421	0.837487	-4.30484
ENSMUSG00000075700	Selenot	3	58484057	58500554	+	16498	-0.0988291	7.22152	-1.66177	0.118639	0.837487	-4.30666
ENSMUSG00000095567	Noc2l	4	156320376	156332073	+	11698	0.0680356	6.78033	1.66129	0.118737	0.837487	-4.31005
ENSMUSG00000022769	Sdf2l1	16	16948002	16950247	-	2246	-0.173893	2.88668	-1.66056	0.118885	0.837487	-4.29711
ENSMUSG00000040794	C1qtnf4	2	90716204	90720869	+	4666	0.106657	7.50011	1.66032	0.118934	0.837487	-4.30552
ENSMUSG00000105081	Gm43110	5	22677765	22677990	-	226	0.453536	-0.577338	1.65968	0.119064	0.837487	-4.47763
ENSMUSG00000038848	Ythdf1	2	180546170	180562742	-	16573	-0.0739262	5.81592	-1.65854	0.119297	0.837487	-4.30671
ENSMUSG00000085925	Rtl1	12	109555627	109566764	-	11138	-0.282105	2.62257	-1.65852	0.119301	0.837487	-4.31046
ENSMUSG00000024942	Capn1	19	6038573	6065927	-	27355	0.130133	4.57096	1.65836	0.119333	0.837487	-4.27894
ENSMUSG00000024991	Eif3a	19	60749555	60779096	-	29542	-0.118903	7.49033	-1.65776	0.119457	0.837487	-4.30841
ENSMUSG00000018217	Pmp22	11	63019808	63050373	+	30566	0.134574	4.22087	1.65771	0.119466	0.837487	-4.27456
ENSMUSG00000051853	Arf3	15	98634515	98661095	-	26581	0.0841647	10.9381	1.65767	0.119474	0.837487	-4.28148
ENSMUSG00000049532	Sall2	14	52548629	52566219	-	17591	-0.107837	6.81347	-1.65753	0.119504	0.837487	-4.31418
ENSMUSG00000069919	Hba-a1	11	32233511	32234465	+	955	0.604023	4.72793	1.65719	0.119573	0.837487	-4.28213
ENSMUSG00000093738	AI606473	3	154036458	154039891	+	3434	-0.364179	1.85518	-1.65708	0.119596	0.837487	-4.3529
ENSMUSG00000027349	Fam98b	2	117080220	117102021	+	21802	-0.109594	5.59685	-1.65649	0.119716	0.837487	-4.30459
ENSMUSG00000014402	Tsg101	7	46538697	46569717	-	31021	-0.0767609	5.991	-1.65629	0.119757	0.837487	-4.31193
ENSMUSG00000022216	Psme1	14	55815580	55818986	+	3407	-0.112894	5.18605	-1.6561	0.119795	0.837487	-4.2954
ENSMUSG00000026999	Nup35	2	80447580	80489250	+	41671	0.102071	5.30816	1.65598	0.119821	0.837487	-4.29831
ENSMUSG00000041890	Git2	5	114865468	114913578	-	48111	0.0742426	5.70646	1.65581	0.119856	0.837487	-4.30742
ENSMUSG00000078670	Fam174b	7	73390050	73426667	+	36618	-0.161102	4.65138	-1.65575	0.119868	0.837487	-4.28332
ENSMUSG00000087120	Gm12279	11	62440873	62441867	-	995	0.273655	0.317837	1.65529	0.119962	0.837565	-4.44054
ENSMUSG00000038295	Atg9b	5	24589179	24597141	-	7963	-0.190222	3.24661	-1.65452	0.120121	0.838086	-4.28813
ENSMUSG00000043411	Usp48	4	137321066	137385848	+	64783	0.130102	7.49242	1.65369	0.120291	0.838214	-4.31272
ENSMUSG00000030307	Slc6a11	6	114108202	114226913	+	118712	-0.360308	7.4839	-1.65256	0.120523	0.838214	-4.31408
ENSMUSG00000005198	Polr2a	11	69624823	69649463	-	24641	-0.0942164	6.52023	-1.6523	0.120576	0.838214	-4.32033
ENSMUSG00000032698	Lmo2	2	103788331	103812223	+	23893	0.1958	5.96029	1.65156	0.12073	0.838214	-4.31615
ENSMUSG00000048027	Rgmb	17	16023450	16051301	-	27852	-0.148249	6.20104	-1.65112	0.120821	0.838214	-4.32001
ENSMUSG00000028684	Urod	4	116847162	116851610	-	4449	-0.07983	5.35352	-1.65052	0.120944	0.838214	-4.30526
ENSMUSG00000021037	Ahsa1	12	87313253	87320772	+	7520	-0.131204	6.32354	-1.65029	0.120991	0.838214	-4.32182
ENSMUSG00000024824	Rad9a	19	4245195	4251661	-	6467	0.125097	4.0992	1.65015	0.12102	0.838214	-4.28057
ENSMUSG00000015085	Entpd2	2	25285886	25291333	+	5448	-0.197099	2.92768	-1.64995	0.121062	0.838214	-4.30268
ENSMUSG00000036067	Slc2a6	2	26911375	26918010	-	6636	0.164783	3.81489	1.64963	0.121128	0.838214	-4.28121
ENSMUSG00000021693	Kif2a	13	107095504	107158634	-	63131	-0.10087	6.0632	-1.64952	0.12115	0.838214	-4.32023
ENSMUSG00000037251	Pomk	8	26470632	26484161	-	13530	0.0646568	5.28745	1.64924	0.121208	0.838214	-4.30486
ENSMUSG00000022469	Rapgef3	15	97642651	97665853	-	23203	-0.145973	5.37417	-1.64916	0.121226	0.838214	-4.30718
ENSMUSG00000045438	Cox19	5	139321944	139337173	-	15230	0.0673265	5.51608	1.64839	0.121384	0.838543	-4.31122
ENSMUSG00000046844	Vat1l	8	114932352	115100811	+	168460	-0.186738	8.01168	-1.64693	0.121688	0.838543	-4.31494
ENSMUSG00000028937	Acot7	4	152262591	152356312	+	93722	-0.167414	7.75322	-1.64665	0.121745	0.838543	-4.31771
ENSMUSG00000053985	Zfp14	7	29735784	29750805	-	15022	-0.0924614	4.17014	-1.6465	0.121777	0.838543	-4.28441
ENSMUSG00000004936	Map2k1	9	64093052	64160913	-	67862	-0.113622	8.92195	-1.64622	0.121835	0.838543	-4.30745
ENSMUSG00000105135	Gm43667	3	34108484	34109578	-	1095	-0.19444	1.20335	-1.64504	0.122081	0.838543	-4.39636
ENSMUSG00000053253	Ndfip2	14	105496008	105546732	+	50725	0.147961	6.54193	1.64466	0.122159	0.838543	-4.32833
ENSMUSG00000022018	Rgcc	14	79526196	79539085	-	12890	0.129192	3.92692	1.6444	0.122214	0.838543	-4.28525
ENSMUSG00000047428	Dlk2	17	46608347	46614197	+	5851	-0.231509	4.52969	-1.6442	0.122256	0.838543	-4.292
ENSMUSG00000035692	Isg15	4	156283912	156285253	-	1342	0.483569	0.648378	1.64292	0.122523	0.838543	-4.42823
ENSMUSG00000027184	Caprin1	2	103593286	103627994	-	34709	-0.134307	7.81843	-1.64214	0.122686	0.838543	-4.32187
ENSMUSG00000020290	Xpo1	11	23206041	23248249	+	42209	-0.192846	6.16577	-1.64159	0.122801	0.838543	-4.33001
ENSMUSG00000028458	Tesk1	4	43441939	43448064	+	6126	0.106713	6.66984	1.64138	0.122844	0.838543	-4.33192
ENSMUSG00000056665	Them6	15	74593053	74596488	+	3436	0.167553	5.88314	1.64125	0.122871	0.838543	-4.32603
ENSMUSG00000022403	St13	15	81247870	81284278	-	36409	-0.106575	7.07289	-1.64104	0.122916	0.838543	-4.33038
ENSMUSG00000038335	Tsr1	11	74788897	74800168	+	11272	-0.0777844	5.14884	-1.641	0.122924	0.838543	-4.31
ENSMUSG00000060636	Rpl35a	16	32876823	32880559	+	3737	0.0897721	7.18544	1.64086	0.122953	0.838543	-4.32946
ENSMUSG00000030878	Cdr2	7	120556259	120581535	-	25277	0.143838	3.99036	1.64052	0.123026	0.838543	-4.28868
ENSMUSG00000025439	Clns1a	7	97345841	97370003	+	24163	-0.0791827	5.88782	-1.63974	0.123189	0.838543	-4.32814
ENSMUSG00000028633	Ctps	4	120397065	120427473	-	30409	-0.0860696	5.47734	-1.63924	0.123293	0.838543	-4.32004
ENSMUSG00000048799	Cep120	18	53814795	53877680	-	62886	-0.102335	6.07303	-1.63917	0.123308	0.838543	-4.33151
ENSMUSG00000026959	Grin1	2	25181193	25209199	-	28007	0.0942332	9.25509	1.63888	0.123369	0.838543	-4.31198
ENSMUSG00000005981	Trap1	16	3857835	3895691	-	37857	-0.0854507	6.30737	-1.6386	0.123428	0.838543	-4.33435
ENSMUSG00000032998	Foxj3	4	119394201	119486316	+	92116	-0.0771218	6.47082	-1.63844	0.123461	0.838543	-4.33526
ENSMUSG00000041444	Arhgap32	9	32027432	32179742	+	152311	0.147836	8.98066	1.63836	0.123479	0.838543	-4.315
ENSMUSG00000021194	Chga	12	102521228	102531287	+	10060	-0.17531	7.26995	-1.63824	0.123503	0.838543	-4.33159
ENSMUSG00000045410	Akr1e1	13	4640749	4659173	-	18425	-0.100617	4.93029	-1.63776	0.123604	0.838543	-4.30773
ENSMUSG00000034800	Zfp661	2	127416582	127429014	-	12433	0.12179	3.56435	1.63694	0.123778	0.838543	-4.2944
ENSMUSG00000068373	D430041D05Rik	2	103973418	104241358	-	267941	0.167713	7.61777	1.63674	0.12382	0.838543	-4.32961
ENSMUSG00000001229	Dpp9	17	56493807	56525905	-	32099	-0.0829697	6.37148	-1.63661	0.123846	0.838543	-4.33687
ENSMUSG00000039770	Ypel5	17	73143448	73158190	+	14743	0.0879054	6.80773	1.63597	0.123981	0.838543	-4.33738
ENSMUSG00000060427	Zfp868	8	70063508	70078199	-	14692	-0.0989718	3.88269	-1.63568	0.124042	0.838543	-4.2928
ENSMUSG00000007653	Gabrb2	11	42310584	42519855	+	209272	-0.201108	6.87828	-1.6356	0.12406	0.838543	-4.33766
ENSMUSG00000072915	Gm12258	11	58737984	58752782	+	14799	-0.0762973	4.94152	-1.63484	0.124221	0.838543	-4.31093
ENSMUSG00000048330	Ric3	7	108633519	108682538	-	49020	-0.0713147	6.62746	-1.63479	0.124231	0.838543	-4.33934
ENSMUSG00000108456	4732496C06Rik	7	116146100	116148599	+	2500	0.207452	1.9267	1.63437	0.124319	0.838543	-4.36052
ENSMUSG00000027257	Pacsin3	2	91086299	91095024	+	8726	0.158753	4.50689	1.63394	0.124411	0.838543	-4.30106
ENSMUSG00000046182	Gsg1l	7	125477592	125681583	-	203992	0.169162	7.57748	1.63355	0.124494	0.838543	-4.33341
ENSMUSG00000051855	Mest	6	30723546	30748464	+	24919	-0.123423	5.02892	-1.63335	0.124535	0.838543	-4.31471
ENSMUSG00000038677	Scube3	17	28361115	28393828	+	32714	0.190211	5.63859	1.63182	0.124861	0.838791	-4.33122
ENSMUSG00000021087	Rtn1	12	72258526	72455828	-	197303	-0.063994	9.89213	-1.63091	0.125054	0.838791	-4.31471
ENSMUSG00000069917	Hba-a2	11	32246489	32247298	+	810	0.622333	3.51973	1.63064	0.12511	0.838791	-4.30058
ENSMUSG00000028221	Pip4p2	4	14864076	14915176	+	51101	-0.102696	5.35088	-1.62927	0.125402	0.838791	-4.3273
ENSMUSG00000034021	Pds5b	5	150597204	150734155	+	136952	-0.132244	7.28903	-1.62918	0.125421	0.838791	-4.3411
ENSMUSG00000027575	Arfgap1	2	180609018	180624319	+	15302	0.0556417	6.79329	1.6289	0.125481	0.838791	-4.34512
ENSMUSG00000028107	Tars2	3	95647288	95667518	-	20231	-0.0865456	5.37845	-1.62863	0.125538	0.838791	-4.32866
ENSMUSG00000033467	Crlf2	5	109702575	109706859	-	4285	0.0930322	4.10501	1.62798	0.125679	0.838791	-4.30045
ENSMUSG00000024039	Cbs	17	31827868	31856212	-	28345	-0.188586	5.19017	-1.62723	0.125839	0.838791	-4.32519
ENSMUSG00000031295	Phka2	X	159285162	159381874	+	96713	0.134134	5.67409	1.62707	0.125873	0.838791	-4.33714
ENSMUSG00000020929	Eftud2	11	102729299	102771811	-	42513	-0.0714043	6.84123	-1.62701	0.125886	0.838791	-4.34706
ENSMUSG00000028931	Kcnab2	4	152475199	152562367	-	87169	0.117806	8.53601	1.62698	0.125891	0.838791	-4.33098
ENSMUSG00000024558	Mapk4	18	74061557	74198430	-	136874	0.143364	6.97983	1.62676	0.125938	0.838791	-4.34623
ENSMUSG00000030007	Cct7	6	85428496	85445457	+	16962	-0.0888591	7.54898	-1.62603	0.126095	0.838791	-4.34174
ENSMUSG00000114540	Gm6421	13	117494748	117495156	-	409	-0.302421	-0.61462	-1.62592	0.126118	0.838791	-4.48565
ENSMUSG00000020953	Coch	12	51640124	51652554	+	12431	0.579982	4.37351	1.62592	0.12612	0.838791	-4.30516
ENSMUSG00000046982	Tshz1	18	84029752	84105831	-	76080	-0.141976	6.2865	-1.62566	0.126174	0.838791	-4.34818
ENSMUSG00000036819	Jmjd4	11	59340871	59349393	+	8523	-0.0752975	5.32721	-1.62517	0.12628	0.838791	-4.33092
ENSMUSG00000064247	Plcxd1	5	110247835	110253819	+	5985	0.148911	5.26079	1.62512	0.126289	0.838791	-4.32896
ENSMUSG00000097412	1810014B01Rik	10	86521389	86530670	+	9282	-0.132011	2.5212	-1.62471	0.126377	0.838791	-4.33597
ENSMUSG00000028156	Eif4e	3	138231940	138265457	+	33518	-0.0706836	6.61704	-1.62459	0.126404	0.838791	-4.35035
ENSMUSG00000022160	Mettl3	14	52532298	52542585	-	10288	-0.109466	4.86592	-1.62432	0.126461	0.838791	-4.31946
ENSMUSG00000036197	Gxylt1	15	93137623	93173060	-	35438	0.122188	4.37114	1.62416	0.126496	0.838791	-4.30768
ENSMUSG00000060548	Tnfrsf19	14	61201324	61283939	-	82616	0.0784756	6.14581	1.62287	0.126773	0.83893	-4.34963
ENSMUSG00000027809	Etfdh	3	79511095	79536807	-	25713	-0.0663303	5.08702	-1.62279	0.126791	0.83893	-4.32693
ENSMUSG00000036202	Rif1	2	51962844	52012395	+	49552	-0.156734	5.00408	-1.62243	0.126869	0.83893	-4.32508
ENSMUSG00000070687	Htr1d	4	136150835	136171709	+	20875	0.189677	4.04968	1.62241	0.126872	0.83893	-4.30486
ENSMUSG00000029426	Scarb2	5	92589173	92654692	-	65520	-0.0779287	7.16883	-1.62212	0.126936	0.83893	-4.34983
ENSMUSG00000025264	Tsr2	X	149870090	149879539	-	9450	-0.065675	6.30915	-1.62103	0.127169	0.839917	-4.35326
ENSMUSG00000055319	Sec23ip	7	128346667	128386560	+	39894	-0.0766055	5.56606	-1.62008	0.127375	0.839961	-4.34227
ENSMUSG00000028906	Epb41	4	131650724	131802632	-	151909	0.171032	7.0573	1.61983	0.127428	0.839961	-4.35303
ENSMUSG00000021144	Mta1	12	113061898	113100826	+	38929	0.0715826	6.07174	1.61941	0.127519	0.839961	-4.35244
ENSMUSG00000029397	Rchy1	5	92096763	92110927	-	14165	0.0622188	5.26925	1.61936	0.12753	0.839961	-4.33525
ENSMUSG00000038502	Ptov1	7	44512491	44519212	-	6722	-0.0937399	7.34036	-1.61851	0.127714	0.839961	-4.35195
ENSMUSG00000001674	Ddx18	1	121481564	121495718	-	14155	-0.10567	4.70197	-1.61833	0.127752	0.839961	-4.32102
ENSMUSG00000000959	Oxa1l	14	54598291	54607130	+	8840	-0.0628171	5.84973	-1.61802	0.12782	0.839961	-4.35056
ENSMUSG00000061479	Snrpa	7	26886430	26895696	-	9267	-0.0810769	5.81134	-1.61732	0.127973	0.839961	-4.35058
ENSMUSG00000010095	Slc3a2	19	8684246	8700733	-	16488	-0.0724637	6.53551	-1.61695	0.128053	0.839961	-4.35855
ENSMUSG00000045210	Vcpip1	1	9788847	9818607	-	29761	-0.11343	6.02581	-1.61649	0.128153	0.839961	-4.35518
ENSMUSG00000009687	Fxyd5	7	30732147	30741906	-	9760	0.180595	2.58313	1.6155	0.128368	0.839961	-4.33932
ENSMUSG00000039220	Ppp1r10	17	36227326	36243175	+	15850	-0.0821031	5.84468	-1.61546	0.128376	0.839961	-4.3532
ENSMUSG00000030844	Rgs10	7	127975345	128020482	-	45138	0.153712	5.71022	1.61521	0.12843	0.839961	-4.35033
ENSMUSG00000062488	Ifit3b	19	34585370	34590801	+	5432	0.254595	2.41351	1.61513	0.128448	0.839961	-4.34691
ENSMUSG00000021054	Sgpp1	12	75761023	75782503	-	21481	-0.103668	5.09704	-1.61509	0.128457	0.839961	-4.33502
ENSMUSG00000027823	Gmps	3	63883527	63930000	+	46474	-0.0887472	5.82713	-1.61386	0.128724	0.839961	-4.35455
ENSMUSG00000034867	Ankrd27	7	35285669	35338651	+	52983	0.118465	5.10903	1.61356	0.128791	0.839961	-4.33667
ENSMUSG00000073609	D2hgdh	1	93752631	93780070	+	27440	0.105751	3.87673	1.61349	0.128805	0.839961	-4.31171
ENSMUSG00000032501	Trib1	15	59520199	59528948	+	8750	-0.226329	3.25579	-1.61346	0.128811	0.839961	-4.31829
ENSMUSG00000015747	Vps45	3	95907144	95965778	-	58635	-0.0834418	5.47926	-1.61313	0.128884	0.839961	-4.34734
ENSMUSG00000027194	Ttc17	2	94131112	94237034	-	105923	-0.0948547	6.0317	-1.61257	0.129007	0.839961	-4.35943
ENSMUSG00000038264	Sema7a	9	57847395	57870148	+	22754	0.209689	6.30963	1.61212	0.129105	0.839961	-4.36235
ENSMUSG00000112237	D630033A02Rik	10	122820979	122822460	-	1482	-0.285357	0.368386	-1.61191	0.12915	0.839961	-4.45054
ENSMUSG00000071343	Gm10327	10	33684493	33685494	-	1002	-0.446189	-1.05484	-1.61111	0.129325	0.839961	-4.5024
ENSMUSG00000004535	Tax1bp1	6	52690714	52743765	+	53052	-0.10632	7.21817	-1.61086	0.12938	0.839961	-4.36137
ENSMUSG00000092187	Gm20457	7	63987298	63995712	-	8415	0.149232	2.38152	1.61066	0.129424	0.839961	-4.35077
ENSMUSG00000028431	Elp1	4	56749680	56802331	-	52652	-0.0826865	6.45581	-1.6106	0.129437	0.839961	-4.3652
ENSMUSG00000006711	D130043K22Rik	13	25029118	25085253	+	56136	0.0956141	5.59751	1.61005	0.129558	0.8402	-4.35331
ENSMUSG00000075590	Nrbp2	15	75957367	75963476	-	6110	0.193141	6.63889	1.6091	0.129765	0.840427	-4.36653
ENSMUSG00000025209	Twnk	19	44994102	45001201	+	7100	-0.0936863	4.60613	-1.60879	0.129834	0.840427	-4.32772
ENSMUSG00000024563	Smad2	18	76374651	76444034	+	69384	-0.0686308	5.39927	-1.60874	0.129845	0.840427	-4.34979
ENSMUSG00000005566	Trim28	7	12733041	12764962	+	31922	-0.0608077	7.2752	-1.60565	0.130526	0.844293	-4.3663
ENSMUSG00000049551	Fzd9	5	135277792	135280084	-	2293	-0.279797	1.93906	-1.60491	0.130688	0.844414	-4.37441
ENSMUSG00000028797	Tmem234	4	129494461	129517852	+	23392	0.0581478	6.39176	1.6048	0.130713	0.844414	-4.37099
ENSMUSG00000036904	Fzd8	18	9212163	9218136	+	5974	-0.216055	1.87967	-1.60377	0.130941	0.845343	-4.37791
ENSMUSG00000106383	E330034L11Rik	3	95546615	95548356	+	1742	-0.151417	2.72261	-1.60267	0.131184	0.845875	-4.34165
ENSMUSG00000021719	Rgs7bp	13	105082412	105191438	-	109027	0.211602	8.45859	1.60196	0.13134	0.845875	-4.35761
ENSMUSG00000024579	Pcyox1l	18	61829908	61840706	-	10799	-0.098041	4.16662	-1.60168	0.131403	0.845875	-4.32473
ENSMUSG00000035953	Pip4p1	14	51163525	51168313	-	4789	0.0580635	6.02332	1.60162	0.131418	0.845875	-4.37073
ENSMUSG00000022962	Gart	16	91418074	91443840	-	25767	-0.0634381	5.36554	-1.60149	0.131446	0.845875	-4.35633
ENSMUSG00000062519	Zfp398	6	47812595	47850471	+	37877	-0.0810785	5.11786	-1.60069	0.131623	0.846471	-4.35012
ENSMUSG00000025417	Pip4k2c	10	127032936	127047454	-	14519	0.115603	6.58224	1.59935	0.13192	0.847841	-4.37713
ENSMUSG00000028126	Pip5k1a	3	94965841	95014241	-	48401	0.089062	6.49136	1.59805	0.132211	0.848691	-4.37849
ENSMUSG00000003477	Inmt	6	55147611	55152028	-	4418	0.355489	1.61201	1.598	0.132222	0.848691	-4.39483
ENSMUSG00000007656	Arpp19	9	74944896	74967595	+	22700	0.230115	8.87847	1.59705	0.132435	0.848799	-4.35832
ENSMUSG00000024687	Osbp	19	11943305	11971476	+	28172	0.0596878	6.73373	1.59654	0.132547	0.848799	-4.37999
ENSMUSG00000044252	Osbpl1a	18	12888371	13074898	-	186528	0.109085	7.01978	1.59648	0.132561	0.848799	-4.37831
ENSMUSG00000017778	Cox7c	13	86192935	86195023	-	2089	0.130926	6.72448	1.59641	0.132577	0.848799	-4.38003
ENSMUSG00000022013	Dnajc15	14	78058121	78112565	-	54445	-0.0928687	5.84603	-1.59549	0.132784	0.849063	-4.37431
ENSMUSG00000030224	Strap	6	137712076	137728930	+	16855	-0.0580252	6.8179	-1.59547	0.132788	0.849063	-4.38092
ENSMUSG00000031667	Aktip	8	91838412	91926604	-	88193	0.0676761	6.85818	1.59408	0.133099	0.84977	-4.38204
ENSMUSG00000012535	Tnpo3	6	29540826	29609886	-	69061	-0.0686101	6.58612	-1.59378	0.133166	0.84977	-4.38335
ENSMUSG00000047842	Diras2	13	52658416	52685315	-	26900	0.167014	8.20792	1.59375	0.133173	0.84977	-4.3687
ENSMUSG00000006335	Tfpt	7	3623323	3632928	-	9606	0.0706251	4.31291	1.59324	0.133287	0.84977	-4.33504
ENSMUSG00000031781	Ciapin1	8	95546432	95564986	-	18555	-0.0635338	5.8765	-1.59246	0.133464	0.84977	-4.37807
ENSMUSG00000041020	Map7d2	X	158197568	158281753	+	84186	-0.0754787	7.12865	-1.59194	0.13358	0.84977	-4.38232
ENSMUSG00000024853	Sf3b2	19	5323960	5345483	-	21524	-0.0600398	8.13095	-1.59184	0.133603	0.84977	-4.37148
ENSMUSG00000079108	Srp54c	12	55276953	55310621	+	33669	-0.10714	4.68826	-1.59136	0.133711	0.84977	-4.34673
ENSMUSG00000067321	Gm7931	5	46571686	46571956	+	271	-0.552999	-2.27193	-1.59115	0.133758	0.84977	-4.53381
ENSMUSG00000000531	Tamalin	15	101122069	101130637	+	8569	0.127516	5.60146	1.59075	0.133849	0.84977	-4.37341
ENSMUSG00000109857	Gm53058	16	13280410	13285101	+	4692	0.334209	1.60168	1.59032	0.133944	0.84977	-4.39881
ENSMUSG00000033917	Gde1	7	118287768	118305001	-	17234	0.0868314	7.52027	1.5903	0.133949	0.84977	-4.37974
ENSMUSG00000022354	Ndufb9	15	58805605	58811337	+	5733	0.139525	5.92578	1.59008	0.134	0.84977	-4.38111
ENSMUSG00000040164	Kcns1	2	164005539	164013033	-	7495	0.188959	3.04244	1.58911	0.134218	0.850203	-4.34096
ENSMUSG00000031365	Zfp275	X	72386227	72402686	+	16460	-0.0939544	5.27942	-1.58883	0.134281	0.850203	-4.36683
ENSMUSG00000026457	Adipor1	1	134343116	134361089	+	17974	0.0615653	6.44893	1.58842	0.134374	0.850203	-4.38866
ENSMUSG00000029648	Flt1	5	147498414	147662821	-	164408	0.141922	6.52209	1.58765	0.134548	0.850203	-4.3895
ENSMUSG00000036580	Spg20	3	55019529	55044743	+	25215	-0.0738965	5.63886	-1.58743	0.134599	0.850203	-4.37807
ENSMUSG00000038776	Ephx1	1	180803775	180848469	-	44695	0.178094	5.25527	1.58718	0.134654	0.850203	-4.36745
ENSMUSG00000048218	Amigo2	15	97142006	97145168	-	3163	-0.140255	3.72153	-1.58706	0.134681	0.850203	-4.33346
ENSMUSG00000086859	Snhg20	11	116966834	116969781	+	2948	0.108345	3.9101	1.58643	0.134825	0.850203	-4.33481
ENSMUSG00000050856	Atp5k	5	108581110	108582314	-	1205	0.12545	6.22154	1.58632	0.134851	0.850203	-4.38923
ENSMUSG00000029810	Tmem176b	6	48810752	48818430	-	7679	-0.131394	4.89643	-1.58603	0.134917	0.850203	-4.35815
ENSMUSG00000032187	Smarca4	9	21527465	21615526	+	88062	-0.0708153	7.55544	-1.58547	0.135044	0.850381	-4.38443
ENSMUSG00000046818	Ddit4l	3	137327373	137334094	+	6722	0.406512	4.08201	1.58499	0.135153	0.850381	-4.33772
ENSMUSG00000024640	Psat1	19	15882042	15924701	-	42660	0.0604067	7.28609	1.58478	0.135199	0.850381	-4.38815
ENSMUSG00000029201	Ugdh	5	65570564	65593292	-	22729	-0.0900312	4.47365	-1.58399	0.13538	0.850538	-4.34763
ENSMUSG00000058793	Cds2	2	132105068	132153970	+	48903	-0.0875758	9.51509	-1.58377	0.135429	0.850538	-4.36516
ENSMUSG00000047013	Fbxo41	6	85446556	85479976	-	33421	0.0775524	7.32001	1.5826	0.135697	0.850538	-4.39007
ENSMUSG00000058581	Gm5801	14	56247993	56248772	-	780	0.445517	-1.2631	1.58256	0.135704	0.850538	-4.51333
ENSMUSG00000072964	Bhlhb9	X	134698343	134791830	+	93488	-0.151098	6.99384	-1.58212	0.135806	0.850538	-4.39397
ENSMUSG00000034501	Pcnx4	12	72583157	72626893	+	43737	-0.0688011	5.87313	-1.58207	0.135818	0.850538	-4.38891
ENSMUSG00000024830	Rps6kb2	19	4203990	4213353	-	9364	0.134884	4.80154	1.58207	0.135818	0.850538	-4.35877
ENSMUSG00000061024	Rrs1	1	9615633	9617680	+	2048	-0.0981497	4.32374	-1.5816	0.135924	0.85067	-4.34599
ENSMUSG00000028879	Stx12	4	132580812	132611820	-	31009	-0.060329	7.0337	-1.58036	0.136208	0.851373	-4.39542
ENSMUSG00000023932	Cdc5l	17	45702810	45744663	-	41854	-0.0969122	6.00628	-1.57957	0.136389	0.851373	-4.39392
ENSMUSG00000074215	Gm10643	8	84790190	84791766	-	1577	0.154131	1.85661	1.57896	0.136529	0.851373	-4.39147
ENSMUSG00000021127	Zfp36l1	12	80154528	80159787	-	5260	-0.142638	4.21642	-1.57845	0.136645	0.851373	-4.3464
ENSMUSG00000027665	Pik3ca	3	32451820	32522635	+	70816	-0.0770805	6.182	-1.57816	0.136712	0.851373	-4.39777
ENSMUSG00000026090	Cracdl	1	37650758	37759166	-	108409	0.131067	8.92332	1.57803	0.136743	0.851373	-4.37715
ENSMUSG00000110525	Gm45893	8	123563290	123563536	+	247	0.637577	-2.48527	1.57792	0.136768	0.851373	-4.53837
ENSMUSG00000008301	Phax	18	56695515	56720784	+	25270	-0.0662165	5.23686	-1.57743	0.13688	0.851373	-4.37709
ENSMUSG00000042215	Bag2	1	33784565	33796876	-	12312	-0.256919	2.64404	-1.57678	0.137029	0.851373	-4.36063
ENSMUSG00000118394	Gm50475	4	131648127	131648839	-	713	0.362908	0.351027	1.57675	0.137035	0.851373	-4.46197
ENSMUSG00000006390	Elovl1	4	118285290	118290150	+	4861	0.142245	4.35697	1.57557	0.137307	0.851373	-4.35209
ENSMUSG00000019997	Ccn2	10	24471340	24474581	+	3242	0.589378	3.49521	1.5754	0.137347	0.851373	-4.3437
ENSMUSG00000005882	Uqcc1	2	155688814	155772230	-	83417	-0.0698078	6.06642	-1.57536	0.137357	0.851373	-4.39926
ENSMUSG00000051238	Swsap1	9	21867051	21869560	+	2510	-0.124393	3.72009	-1.57509	0.137419	0.851373	-4.34318
ENSMUSG00000036672	Cenpt	8	106571305	106579910	-	8606	-0.0981589	4.11068	-1.57498	0.137444	0.851373	-4.34739
ENSMUSG00000058706	0610030E20Rik	6	72324300	72330131	+	5832	0.0990219	4.78087	1.57487	0.13747	0.851373	-4.36517
ENSMUSG00000014504	Srp19	18	34463900	34469652	+	5753	-0.0738994	4.87444	-1.57436	0.137587	0.851373	-4.36885
ENSMUSG00000043079	Synpo	18	60727045	60793214	-	66170	0.0901557	7.78711	1.57421	0.137621	0.851373	-4.39349
ENSMUSG00000022151	Ttc33	15	5215006	5247817	+	32812	-0.0786493	5.10812	-1.5739	0.137693	0.851373	-4.37667
ENSMUSG00000031074	Fgf3	7	144391820	144398173	+	6354	0.225322	3.25824	1.57281	0.137946	0.851373	-4.34811
ENSMUSG00000006005	Tpr	1	150268589	150325686	+	57098	-0.113645	7.15592	-1.57212	0.138105	0.851373	-4.40295
ENSMUSG00000064037	Gpn1	5	31652085	31670248	+	18164	-0.0771919	4.93259	-1.57209	0.138112	0.851373	-4.37293
ENSMUSG00000005899	Smpd4	16	17437218	17462692	+	25475	0.113122	6.48519	1.57101	0.138362	0.851373	-4.4071
ENSMUSG00000024513	Mbd2	18	70701260	70759202	+	57943	0.0875765	5.72508	1.57098	0.13837	0.851373	-4.397
ENSMUSG00000031166	Wdr13	X	7989540	7999131	-	9592	0.0586704	8.19829	1.5708	0.13841	0.851373	-4.39243
ENSMUSG00000043881	Kbtbd7	14	79663951	79668476	+	4526	-0.142091	5.14401	-1.5707	0.138434	0.851373	-4.38101
ENSMUSG00000027573	Gid8	2	180351910	180360526	+	8617	-0.0657759	5.76592	-1.5706	0.138457	0.851373	-4.39858
ENSMUSG00000035561	Aldh1b1	4	45799022	45804604	+	5583	-0.133615	4.23822	-1.57039	0.138506	0.851373	-4.3541
ENSMUSG00000028657	Ppt1	4	122730035	122752968	+	22934	-0.0767044	6.94655	-1.57005	0.138585	0.851373	-4.40703
ENSMUSG00000029776	Hibadh	6	52523213	52617374	-	94162	-0.0755428	5.96753	-1.56971	0.138664	0.851373	-4.40358
ENSMUSG00000003660	Snrnp200	2	127050306	127082371	+	32066	-0.122116	7.66188	-1.56969	0.138669	0.851373	-4.39963
ENSMUSG00000046994	Mars2	1	55276336	55287629	+	11294	-0.109951	4.44669	-1.56896	0.138838	0.851438	-4.36084
ENSMUSG00000000085	Scmh1	4	120262478	120387383	+	124906	0.0863464	6.51518	1.56854	0.138935	0.851438	-4.4098
ENSMUSG00000021242	Npc2	12	84801336	84819926	-	18591	0.0761253	6.13788	1.56828	0.138997	0.851438	-4.40741
ENSMUSG00000100514	Gm12960	4	111664555	111665620	-	1066	-0.412975	0.363146	-1.56818	0.139019	0.851438	-4.46356
ENSMUSG00000038415	Foxq1	13	31740117	31744959	+	4843	0.217956	1.87122	1.56738	0.139206	0.85176	-4.39656
ENSMUSG00000070923	Klhl9	4	88636529	88640702	-	4174	-0.11438	6.68789	-1.56684	0.139332	0.85176	-4.41179
ENSMUSG00000073678	Pgap1	1	54512153	54596843	-	84691	-0.157108	5.6963	-1.56649	0.139413	0.85176	-4.4012
ENSMUSG00000026816	Gtf3c5	2	28456323	28473763	-	17441	-0.0690851	4.95394	-1.5661	0.139504	0.85176	-4.37945
ENSMUSG00000058297	Spock2	10	59942041	59971020	+	28980	-0.0855092	10.1409	-1.56568	0.139602	0.85176	-4.37694
ENSMUSG00000020661	Dnmt3a	12	3856007	3964443	+	108437	0.104679	7.45813	1.56549	0.139646	0.85176	-4.40636
ENSMUSG00000086119	Gm2415	9	118719143	118755523	-	36381	0.120438	6.21499	1.56541	0.139666	0.85176	-4.4112
ENSMUSG00000048997	Atxn7l2	3	108109538	108118250	-	8713	0.137035	4.43525	1.56443	0.139896	0.851777	-4.36442
ENSMUSG00000036281	Snapc4	2	26252777	26270665	-	17889	0.177864	5.51584	1.56388	0.140025	0.851777	-4.39869
ENSMUSG00000052305	Hbb-bs	7	103475741	103477303	-	1563	0.563887	5.86703	1.56356	0.140099	0.851777	-4.40593
ENSMUSG00000070570	Slc17a7	7	44813373	44825566	+	12194	1.35335	6.59072	1.56221	0.140416	0.851777	-4.40952
ENSMUSG00000099966	2810402E24Rik	14	20691077	20694116	+	3040	0.235878	1.69348	1.56169	0.140539	0.851777	-4.40723
ENSMUSG00000055553	Kxd1	8	70960922	70980606	-	19685	0.0735238	5.30504	1.56153	0.140575	0.851777	-4.39504
ENSMUSG00000006134	Crkl	16	17269851	17305298	+	35448	-0.0760332	6.10942	-1.56139	0.140609	0.851777	-4.41451
ENSMUSG00000054676	1600014C10Rik	7	37882642	37896992	+	14351	-0.0605306	5.0914	-1.56119	0.140655	0.851777	-4.38875
ENSMUSG00000020964	Sel1l	12	91772817	91815931	-	43115	-0.0753951	7.66209	-1.56082	0.140742	0.851777	-4.40881
ENSMUSG00000037526	Atg14	14	47778350	47808106	-	29757	0.0741332	5.16533	1.56077	0.140754	0.851777	-4.3914
ENSMUSG00000030747	Dgat2	7	98802865	98831926	-	29062	0.12982	7.38047	1.56059	0.140797	0.851777	-4.41236
ENSMUSG00000064120	Mocs1	17	49735390	49762463	+	27074	0.0942807	3.8859	1.56048	0.140822	0.851777	-4.35636
ENSMUSG00000053411	Cbx7	15	79800008	79855320	-	55313	0.0812736	6.5243	1.56036	0.140851	0.851777	-4.41844
ENSMUSG00000021238	Aldh6a1	12	84477491	84497778	-	20288	-0.0849903	6.23658	-1.56015	0.140901	0.851777	-4.41729
ENSMUSG00000070462	Tlnrd1	7	83529081	83533513	-	4433	0.151626	5.76518	1.55997	0.140943	0.851777	-4.40915
ENSMUSG00000020346	Mgat1	11	49135018	49153857	+	18840	0.0691297	6.23426	1.55925	0.141113	0.851794	-4.41797
ENSMUSG00000027951	Adar	3	89622329	89660753	+	38425	-0.0660968	8.22672	-1.5591	0.141148	0.851794	-4.40409
ENSMUSG00000039202	Abhd2	7	78922947	79015256	+	92310	0.0798961	7.68851	1.55887	0.141201	0.851794	-4.4105
ENSMUSG00000035941	Ibtk	9	85569413	85631387	-	61975	-0.0782369	5.26784	-1.55849	0.141291	0.851824	-4.39709
ENSMUSG00000010086	Rnf112	11	61339268	61344957	-	5690	0.116697	8.35545	1.55725	0.141584	0.85267	-4.40452
ENSMUSG00000026667	Uhmk1	1	170020989	170042966	-	21978	-0.0967263	8.3196	-1.55697	0.141651	0.85267	-4.40523
ENSMUSG00000074622	Mafb	2	160205623	160208985	-	3363	0.134351	3.91256	1.55609	0.141858	0.85267	-4.36034
ENSMUSG00000031010	Usp9x	X	12937737	13039567	+	101831	-0.176376	7.66366	-1.55523	0.142063	0.85267	-4.41456
ENSMUSG00000058569	Tmed9	13	55721545	55745510	+	23966	0.0828891	6.60989	1.55492	0.142136	0.85267	-4.42416
ENSMUSG00000000056	Narf	11	121128079	121146682	+	18604	0.10846	5.97427	1.55482	0.142159	0.85267	-4.41891
ENSMUSG00000091864	Gm17102	7	41043122	41046871	+	3750	0.259206	1.11645	1.55471	0.142186	0.85267	-4.43617
ENSMUSG00000045316	Fahd1	17	25067866	25069338	-	1473	-0.110943	3.80545	-1.55458	0.142217	0.85267	-4.36041
ENSMUSG00000074743	Thbd	2	148246386	148250108	-	3723	-0.200411	2.49641	-1.5537	0.142426	0.85267	-4.37939
ENSMUSG00000017734	Dbndd2	2	164328026	164335239	+	7214	0.0805174	6.07202	1.55363	0.142444	0.85267	-4.42179
ENSMUSG00000002343	Armc6	8	70672822	70687116	-	14295	-0.0773599	4.91012	-1.55359	0.142452	0.85267	-4.39023
ENSMUSG00000033623	Pcgf3	5	108609098	108654842	+	45745	-0.0776195	5.81785	-1.55293	0.142609	0.85267	-4.41802
ENSMUSG00000019737	Syne4	7	30014232	30018471	+	4240	0.265754	1.79789	1.5529	0.142618	0.85267	-4.40686
ENSMUSG00000036285	Noa1	5	77442029	77457931	-	15903	-0.0732182	4.38762	-1.55262	0.142685	0.85267	-4.37408
ENSMUSG00000025823	Pdia4	6	47773075	47790364	-	17290	-0.166737	5.46297	-1.5523	0.14276	0.85267	-4.40934
ENSMUSG00000039474	Wfs1	5	37123448	37146549	-	23102	-0.224615	9.266	-1.55216	0.142792	0.85267	-4.39921
ENSMUSG00000038975	Rabggtb	3	153612924	153618646	-	5723	-0.0683283	5.45902	-1.55165	0.142914	0.852891	-4.40985
ENSMUSG00000026600	Soat1	1	156252095	156301901	-	49807	-0.0971795	4.97183	-1.55094	0.143084	0.853151	-4.39489
ENSMUSG00000048905	Bnip5	17	29115366	29134298	-	18933	-0.145183	3.4155	-1.55066	0.14315	0.853151	-4.36269
ENSMUSG00000032308	Ulk3	9	57496735	57503516	+	6782	0.125236	4.69687	1.55026	0.143246	0.853151	-4.38587
ENSMUSG00000029804	Herc3	6	58808450	58897383	+	88934	-0.0933587	6.83817	-1.55004	0.143298	0.853151	-4.42874
ENSMUSG00000026791	Slc2a8	2	32863002	32872095	-	9094	0.0688401	4.67783	1.54799	0.143788	0.854814	-4.3875
ENSMUSG00000024622	Hmgxb3	18	61264349	61310122	-	45774	0.0630939	6.18271	1.54794	0.143802	0.854814	-4.42924
ENSMUSG00000109733	Gm33940	2	19432857	19435254	+	2398	0.234391	0.59727	1.54781	0.143833	0.854814	-4.46052
ENSMUSG00000021048	Mthfd1	12	76302072	76366577	+	64506	-0.073939	5.80843	-1.54706	0.144011	0.855138	-4.42385
ENSMUSG00000007812	Zfp655	5	145168525	145184112	+	15588	-0.0999407	5.10259	-1.54687	0.144058	0.855138	-4.40329
ENSMUSG00000025862	Stag2	X	41238194	41366062	+	127869	-0.141324	6.16865	-1.546	0.144268	0.855875	-4.43137
ENSMUSG00000031358	Msl3	X	167437113	167456894	-	19782	-0.0844474	4.14143	-1.54563	0.144356	0.855892	-4.37367
ENSMUSG00000041164	Zmiz2	11	6339074	6356158	+	17085	0.0917572	8.22973	1.54493	0.144524	0.856003	-4.41846
ENSMUSG00000037499	Nenf	1	191038986	191050391	-	11406	0.120597	5.17825	1.54431	0.144673	0.856003	-4.40805
ENSMUSG00000027999	Pla2g12a	3	129672255	129689474	+	17220	0.0941256	4.66553	1.54373	0.144815	0.856003	-4.39104
ENSMUSG00000029823	Luc7l2	6	38528269	38586405	+	58137	0.140519	7.39412	1.54344	0.144883	0.856003	-4.42995
ENSMUSG00000036305	Rpl39-ps	15	102543473	102543623	+	151	0.353138	-0.689467	1.54298	0.144994	0.856003	-4.50523
ENSMUSG00000024429	Gnl1	17	36290743	36300354	+	9612	0.0968707	7.65912	1.5427	0.145063	0.856003	-4.42751
ENSMUSG00000024740	Ddb1	19	10582691	10607183	+	24493	-0.0842807	8.21255	-1.54261	0.145083	0.856003	-4.42101
ENSMUSG00000040699	Limd2	11	106047082	106051686	-	4605	0.104994	6.412	1.54216	0.145191	0.856003	-4.43705
ENSMUSG00000032184	Lysmd2	9	75533023	75545053	+	12031	-0.0751313	5.20565	-1.54216	0.145192	0.856003	-4.41136
ENSMUSG00000010045	Tmem115	9	107411144	107415872	+	4729	-0.0981105	5.15868	-1.5414	0.145375	0.856003	-4.41055
ENSMUSG00000043822	Adamtsl5	10	80174944	80184246	-	9303	0.180181	2.91478	1.54095	0.145486	0.856003	-4.37634
ENSMUSG00000032383	Ppib	9	65967504	65973905	+	6402	0.0668493	6.77556	1.5404	0.145618	0.856003	-4.43894
ENSMUSG00000008958	Vps72	3	95018333	95030362	+	12030	-0.0668253	4.96976	-1.54028	0.145648	0.856003	-4.40517
ENSMUSG00000056966	Gjc3	5	137951723	137961360	-	9638	0.105291	5.94814	1.53984	0.145755	0.856003	-4.43394
ENSMUSG00000070002	Ell	8	70992107	71045508	+	53402	0.0963994	5.1338	1.53967	0.145796	0.856003	-4.4112
ENSMUSG00000059864	Olfr1393	11	49169131	49173596	+	4466	0.255801	3.40572	1.53953	0.145829	0.856003	-4.37109
ENSMUSG00000083364	Llph-ps2	X	13084449	13084841	-	393	-0.376975	-0.14133	-1.53933	0.145877	0.856003	-4.48934
ENSMUSG00000039114	Nrn1	13	36909335	36919105	-	9771	0.969204	3.25855	1.5389	0.145983	0.856003	-4.37338
ENSMUSG00000022212	Cpne6	14	55747902	55754888	+	6987	-0.141907	7.13667	-1.53876	0.146016	0.856003	-4.43794
ENSMUSG00000022208	Jph4	14	55344283	55354392	-	10110	0.0641701	9.04856	1.53849	0.146082	0.856003	-4.41528
ENSMUSG00000060257	Scrt2	2	151923449	151937722	+	14274	0.131339	5.14625	1.5379	0.146225	0.856065	-4.4133
ENSMUSG00000050192	Eif5a2	3	28835425	28852995	+	17571	-0.117215	5.53947	-1.53774	0.146264	0.856065	-4.42634
ENSMUSG00000005360	Slc1a3	15	8663608	8740248	-	76641	-0.0878164	9.32956	-1.5372	0.146395	0.856333	-4.41323
ENSMUSG00000027822	Slc33a1	3	63840928	63872189	-	31262	-0.095339	5.14133	-1.53642	0.146584	0.856939	-4.41487
ENSMUSG00000028859	Csf3r	4	125918343	125938233	+	19891	0.114162	3.46663	1.53488	0.14696	0.858066	-4.3744
ENSMUSG00000001520	Nrip2	6	128376259	128393390	+	17132	-0.292076	3.8373	-1.53465	0.147017	0.858066	-4.37708
ENSMUSG00000003360	Ddx23	15	98543015	98560775	-	17761	-0.0672033	6.29025	-1.53452	0.147049	0.858066	-4.44448
ENSMUSG00000054716	Zfp771	7	126843446	126853975	+	10530	0.103253	5.11054	1.53423	0.147119	0.858066	-4.41574
ENSMUSG00000030032	Wdr54	6	83126342	83133379	-	7038	0.143811	4.57732	1.53361	0.147272	0.858457	-4.3973
ENSMUSG00000033065	Pfkm	15	97990470	98030332	+	39863	-0.0682627	8.73047	-1.53251	0.14754	0.859521	-4.42509
ENSMUSG00000112721	Gm35608	10	76520266	76522635	+	2370	0.219622	1.61909	1.53153	0.147781	0.859915	-4.42392
ENSMUSG00000024177	Nme4	17	26310708	26314576	-	3869	0.172097	1.38192	1.53119	0.147864	0.859915	-4.43384
ENSMUSG00000002129	Sf3a1	11	4110350	4132541	+	22192	-0.0531158	6.61912	-1.53119	0.147865	0.859915	-4.44913
ENSMUSG00000083411	Rpl30-ps10	X	70847294	70847640	+	347	0.743308	-2.3197	1.5302	0.148108	0.860446	-4.54168
ENSMUSG00000048965	Mrgpre	7	143332100	143338237	-	6138	-0.280342	3.49647	-1.52958	0.14826	0.860446	-4.37842
ENSMUSG00000026634	Angel2	1	190657309	190679159	+	21851	0.102041	6.48073	1.52921	0.14835	0.860446	-4.45081
ENSMUSG00000102101	Zbtb11os1	16	55793631	55794980	-	1350	0.176102	2.32689	1.52883	0.148444	0.860446	-4.39927
ENSMUSG00000021340	Gpld1	13	25127135	25176484	+	49350	-0.107276	6.11174	-1.52882	0.148447	0.860446	-4.4484
ENSMUSG00000054304	D130007C19Rik	4	123795922	123797427	-	1506	-0.303723	0.0156015	-1.52836	0.14856	0.860446	-4.48695
ENSMUSG00000022679	Mpv17l	16	13721025	13767483	+	46459	0.0872991	6.34388	1.52731	0.148818	0.860446	-4.45212
ENSMUSG00000053746	Ptrh1	2	32665798	32667609	+	1812	-0.149641	1.5015	-1.52631	0.149067	0.860446	-4.43072
ENSMUSG00000025278	Flnb	14	14518185	14651816	-	133632	0.147503	6.86412	1.52624	0.149082	0.860446	-4.453
ENSMUSG00000060962	Dmkn	7	30463181	30480488	+	17308	0.275521	3.38011	1.52584	0.149181	0.860446	-4.38129
ENSMUSG00000070532	Ccdc190	1	169756217	169762222	+	6006	-0.255105	3.36635	-1.52521	0.149337	0.860446	-4.38176
ENSMUSG00000052727	Map1b	13	99557954	99653048	-	95095	-0.129146	9.67694	-1.52419	0.14959	0.860446	-4.42191
ENSMUSG00000028039	Efna3	3	89221206	89230272	-	9067	0.104831	5.73156	1.52412	0.149606	0.860446	-4.44515
ENSMUSG00000027091	Zc3h15	2	83474779	83494966	+	20188	-0.0907087	6.56437	-1.52273	0.149952	0.860446	-4.45794
ENSMUSG00000030982	Vps35l	7	118339449	118442189	+	102741	-0.055363	6.2151	-1.52238	0.15004	0.860446	-4.4563
ENSMUSG00000019470	Xab2	8	3658421	3671316	-	12896	-0.0602284	5.667	-1.52232	0.150055	0.860446	-4.44556
ENSMUSG00000000339	Rtca	3	116282612	116301857	-	19246	0.0746491	5.60931	1.52226	0.150068	0.860446	-4.44381
ENSMUSG00000006576	Slc4a3	1	75522910	75538816	+	15907	0.0576585	7.98735	1.52187	0.150167	0.860446	-4.44467
ENSMUSG00000066189	Cacng3	7	122269715	122368616	+	98902	0.099177	7.03393	1.52178	0.150188	0.860446	-4.45632
ENSMUSG00000066324	Bpnt2	4	4762484	4793355	-	30872	-0.0793299	6.87112	-1.5213	0.150307	0.860446	-4.45838
ENSMUSG00000018659	Pnpo	11	96828651	96834812	-	6162	0.0895987	5.95807	1.52108	0.150363	0.860446	-4.45345
ENSMUSG00000031297	Slc7a3	X	100122816	100129626	-	6811	-0.274163	2.91266	-1.52104	0.150372	0.860446	-4.38933
ENSMUSG00000032578	Cish	9	107173225	107179983	+	6759	0.143293	3.34728	1.52103	0.150375	0.860446	-4.38489
ENSMUSG00000048949	Gm6206	X	102206716	102209013	-	2298	-0.210909	1.23885	-1.52075	0.150445	0.860446	-4.44361
ENSMUSG00000026584	Scyl3	1	163756669	163782695	+	26027	0.118532	5.38413	1.52073	0.15045	0.860446	-4.43832
ENSMUSG00000001440	Kpnb1	11	97050540	97078707	-	28168	-0.0690461	7.69365	-1.52061	0.150479	0.860446	-4.44962
ENSMUSG00000038722	Bud31	5	145077172	145084888	+	7717	0.0619472	5.10401	1.52032	0.150552	0.860446	-4.42917
ENSMUSG00000026277	Stk25	1	93547473	93586381	-	38909	0.0600724	7.96414	1.51998	0.150637	0.860446	-4.44686
ENSMUSG00000079111	Kdelr2	5	143389593	143407656	+	18064	-0.111955	4.33563	-1.51987	0.150663	0.860446	-4.40192
ENSMUSG00000045257	Morn2	17	80597632	80604905	+	7274	-0.110094	3.32344	-1.51921	0.150829	0.860446	-4.38627
ENSMUSG00000026739	Bmi1	2	18681829	18691440	+	9612	-0.101551	5.3104	-1.51891	0.150904	0.860446	-4.43792
ENSMUSG00000052658	5830454E08Rik	9	120406397	120407140	+	744	0.334701	-0.0136962	1.5184	0.151031	0.860446	-4.49067
ENSMUSG00000053647	Gper1	5	139408906	139413555	+	4650	0.160705	2.18148	1.51824	0.151072	0.860446	-4.40962
ENSMUSG00000000275	Trim25	11	88890202	88911119	+	20918	0.116981	3.60391	1.51811	0.151104	0.860446	-4.38766
ENSMUSG00000035152	Ap2b1	11	83189850	83295861	+	106012	-0.0707424	8.8732	-1.51811	0.151104	0.860446	-4.43761
ENSMUSG00000104960	Snhg8	3	123301201	123302053	-	853	0.154072	3.96229	1.51789	0.151159	0.860446	-4.39307
ENSMUSG00000078307	AI593442	9	52584342	52591080	-	6739	0.202065	7.41111	1.51737	0.151288	0.860446	-4.45647
ENSMUSG00000037278	Tmem97	11	78432643	78441603	-	8961	0.107348	3.32575	1.51735	0.151293	0.860446	-4.38762
ENSMUSG00000043419	Rnf227	11	69231287	69233467	+	2181	-0.0908635	6.60173	-1.5168	0.151431	0.860446	-4.46407
ENSMUSG00000039960	Rhou	8	124380668	124390623	+	9956	0.198539	4.86712	1.51654	0.151497	0.860446	-4.42368
ENSMUSG00000025935	Tram1	1	13634922	13660134	-	25213	-0.131687	4.11082	-1.51617	0.151588	0.860446	-4.39833
ENSMUSG00000028782	Adgrb2	4	129878663	129916426	+	37764	0.0644103	8.91915	1.51587	0.151664	0.860446	-4.43922
ENSMUSG00000028648	Ndufs5	4	123606503	123611995	-	5493	0.0866045	5.814	1.5154	0.151783	0.860446	-4.45613
ENSMUSG00000030870	Ubfd1	7	121666398	121681417	+	15020	-0.0905918	6.12549	-1.51273	0.152454	0.860446	-4.46513
ENSMUSG00000049717	Lig4	8	10019049	10027686	-	8638	-0.138317	3.64083	-1.51239	0.152538	0.860446	-4.39246
ENSMUSG00000027330	Cdc25b	2	131028869	131040417	+	11549	0.153185	4.28101	1.51232	0.152556	0.860446	-4.40657
ENSMUSG00000070737	Tmem35b	4	127017484	127023437	+	5954	0.174504	2.80167	1.51056	0.153	0.860446	-4.39808
ENSMUSG00000091050	9330020H09Rik	15	98465205	98467464	+	2260	0.229567	0.866281	1.51015	0.153103	0.860446	-4.46224
ENSMUSG00000034152	Exoc3	13	74317607	74356851	-	39245	-0.0688515	7.11438	-1.50991	0.153164	0.860446	-4.46786
ENSMUSG00000057134	Ado	10	67380341	67384898	-	4558	0.0878255	5.74496	1.50974	0.153208	0.860446	-4.46012
ENSMUSG00000027300	Ubox5	2	130431922	130471958	-	40037	0.0877047	4.46239	1.50969	0.15322	0.860446	-4.41526
ENSMUSG00000037669	Ldah	12	8258107	8335759	+	77653	-0.0714683	5.95593	-1.50869	0.153473	0.860446	-4.46633
ENSMUSG00000033161	Atp1a1	3	101483535	101512000	-	28466	-0.129238	9.49857	-1.50804	0.153638	0.860446	-4.43963
ENSMUSG00000022346	Myc	15	61857240	61862223	+	4984	-0.175074	1.93646	-1.50773	0.153716	0.860446	-4.42287
ENSMUSG00000042138	Msantd2	9	37400317	37435921	+	35605	0.158313	4.33212	1.50745	0.153789	0.860446	-4.41251
ENSMUSG00000016427	Ndufa1	X	36451241	36454816	-	3576	0.0845508	5.51529	1.50743	0.153794	0.860446	-4.45586
ENSMUSG00000018415	Gid4	11	60307971	60341753	+	33783	0.0706363	6.58479	1.50725	0.153838	0.860446	-4.47365
ENSMUSG00000074796	Slc4a11	2	130526033	130539439	-	13407	0.224053	3.95643	1.50714	0.153866	0.860446	-4.40181
ENSMUSG00000053716	Dusp7	9	106245831	106252923	+	7093	0.101291	5.64721	1.5068	0.153953	0.860446	-4.4604
ENSMUSG00000027574	Nkain4	2	180576565	180596492	-	19928	-0.154171	4.70044	-1.50678	0.153959	0.860446	-4.42721
ENSMUSG00000073293	Nudt10	X	6080750	6085069	-	4320	-0.0835883	4.59566	-1.50641	0.154051	0.860446	-4.42349
ENSMUSG00000073779	Lrp8os2	4	107663230	107680219	-	16990	0.254021	3.64974	1.50636	0.154066	0.860446	-4.39715
ENSMUSG00000060212	Pcnx2	8	126478247	126625056	-	146810	0.073628	6.96612	1.50633	0.154072	0.860446	-4.47285
ENSMUSG00000109450	Gm39043	7	83463915	83487553	+	23639	0.43519	3.51949	1.50546	0.154293	0.860446	-4.39661
ENSMUSG00000040006	Ginm1	10	7643711	7668588	-	24878	-0.0755669	4.09381	-1.50539	0.154311	0.860446	-4.40706
ENSMUSG00000073680	Tmem88b	4	155866048	155870331	-	4284	0.112793	5.96954	1.50445	0.154551	0.860446	-4.47058
ENSMUSG00000042605	Atxn2	5	121849400	121954556	+	105157	-0.0723469	6.40879	-1.50441	0.15456	0.860446	-4.47636
ENSMUSG00000039834	Zfp335	2	164733802	164753677	-	19876	0.0822479	5.31563	1.50376	0.154725	0.860446	-4.45286
ENSMUSG00000020089	Ppa1	10	61484331	61509947	+	25617	-0.0556595	6.08469	-1.50336	0.154827	0.860446	-4.47405
ENSMUSG00000035885	Cox8a	19	7192518	7194981	-	2464	0.123417	8.20136	1.50312	0.154889	0.860446	-4.46084
ENSMUSG00000018166	Erbb3	10	128403392	128425521	-	22130	0.0986195	4.18023	1.50299	0.154924	0.860446	-4.41157
ENSMUSG00000023473	Celsr3	9	108703519	108730168	+	26650	0.130893	7.11513	1.50297	0.154927	0.860446	-4.47473
ENSMUSG00000020377	Ltc4s	11	50127288	50129443	-	2156	0.218613	1.73454	1.50272	0.154992	0.860446	-4.43259
ENSMUSG00000024537	Psmg2	18	67774669	67787232	+	12564	-0.0824652	4.36852	-1.50229	0.155103	0.860446	-4.4187
ENSMUSG00000027742	Cog6	3	52889296	52924658	-	35363	-0.0685397	5.89608	-1.50213	0.155141	0.860446	-4.47174
ENSMUSG00000035596	Mboat7	7	3680788	3696522	-	15735	-0.0795192	7.61789	-1.50203	0.155167	0.860446	-4.46943
ENSMUSG00000006920	Ezh1	11	101081941	101117289	-	35349	0.057595	6.5315	1.50171	0.15525	0.860446	-4.47935
ENSMUSG00000020821	Kif1c	11	70591374	70622790	+	31417	0.107768	7.00458	1.50153	0.155295	0.860446	-4.47737
ENSMUSG00000049999	Ppp1r3d	2	178052999	178056265	-	3267	0.104609	3.17234	1.5012	0.15538	0.860446	-4.39971
ENSMUSG00000037720	Tmem33	5	67417908	67448804	+	30897	-0.100893	6.34659	-1.50116	0.155391	0.860446	-4.47932
ENSMUSG00000072769	Gm10419	5	108515635	108526105	+	10471	0.117196	6.82988	1.50096	0.155441	0.860446	-4.47928
ENSMUSG00000009394	Syn2	6	115111863	115258967	+	147105	-0.0996831	8.64462	-1.50096	0.155441	0.860446	-4.45744
ENSMUSG00000030688	Stard10	7	100966293	100995833	+	29541	0.0863414	6.50719	1.50091	0.155454	0.860446	-4.48006
ENSMUSG00000025854	Fam20c	5	138740269	138795832	+	55564	-0.082259	6.06178	-1.50078	0.155488	0.860446	-4.47634
ENSMUSG00000029507	Pus1	5	110921533	110928525	-	6993	-0.194361	3.54633	-1.50039	0.155588	0.860446	-4.40079
ENSMUSG00000049124	Gm8186	17	26317965	26318195	-	231	0.366084	-0.222214	1.49875	0.156008	0.860446	-4.5017
ENSMUSG00000031565	Fgfr1	8	26003670	26065734	+	62065	-0.112817	6.25005	-1.4974	0.156355	0.860446	-4.48233
ENSMUSG00000042446	Zmym4	4	126755732	126861928	-	106197	-0.0869964	6.20818	-1.49713	0.156425	0.860446	-4.48214
ENSMUSG00000020671	Rab10	12	3297428	3359969	-	62542	-0.0761184	7.02227	-1.49666	0.156544	0.860446	-4.48236
ENSMUSG00000038267	Slc22a23	13	34363141	34529165	-	166025	0.0795024	7.0609	1.49592	0.156737	0.860446	-4.48257
ENSMUSG00000018481	Appbp2	11	85078088	85125956	-	47869	-0.0714257	6.5358	-1.4958	0.156768	0.860446	-4.48559
ENSMUSG00000029602	Rasal1	5	120786877	120817662	+	30786	-0.172066	6.70958	-1.49573	0.156785	0.860446	-4.48555
ENSMUSG00000026083	Eif5b	1	38037091	38094660	+	57570	-0.067436	6.47242	-1.49563	0.15681	0.860446	-4.4856
ENSMUSG00000018334	Ksr1	11	78904266	79037233	-	132968	-0.116062	6.44194	-1.49563	0.156811	0.860446	-4.48553
ENSMUSG00000090622	A930033H14Rik	10	69045592	69048928	-	3337	0.157068	0.93311	1.49522	0.156916	0.860446	-4.46481
ENSMUSG00000020889	Nr1d1	11	98658758	98666159	-	7402	0.144316	6.54977	1.49519	0.156923	0.860446	-4.48583
ENSMUSG00000042363	Lgalsl	11	20773576	20781056	-	7481	-0.0738538	6.25638	-1.49511	0.156945	0.860446	-4.48471
ENSMUSG00000041629	Fam104a	11	113552145	113574981	-	22837	0.0811001	5.109	1.4951	0.156949	0.860446	-4.45376
ENSMUSG00000092626	9130230N09Rik	11	22808931	22811264	+	2334	0.296322	1.75552	1.49454	0.157091	0.860446	-4.43571
ENSMUSG00000020585	Laptm4a	12	8971664	8988742	+	17079	-0.0522642	7.24917	-1.49386	0.157267	0.860446	-4.4826
ENSMUSG00000060019	Gm10073	8	107299641	107299982	-	342	-0.402442	-1.8018	-1.49341	0.157384	0.860446	-4.53784
ENSMUSG00000020925	Ccdc43	11	102575512	102588608	-	13097	-0.0825772	4.37864	-1.49287	0.157523	0.860446	-4.42743
ENSMUSG00000041781	Cpsf2	12	101942247	101972683	+	30437	-0.0818936	5.81138	-1.49264	0.157584	0.860446	-4.47933
ENSMUSG00000032376	Usp3	9	66421919	66500424	-	78506	0.133833	5.73266	1.49259	0.157597	0.860446	-4.47696
ENSMUSG00000028917	Plekhm2	4	141353045	141392210	-	39166	0.0971724	6.80638	1.49249	0.157622	0.860446	-4.48811
ENSMUSG00000046909	Tefm	11	80027504	80033001	-	5498	-0.11866	2.94863	-1.49241	0.157643	0.860446	-4.40748
ENSMUSG00000023905	Tnfrsf12a	17	23894419	23896442	-	2024	-0.226568	1.03706	-1.49238	0.15765	0.860446	-4.46193
ENSMUSG00000025978	Rftn2	1	55209318	55265941	-	56624	-0.111093	5.14562	-1.49233	0.157664	0.860446	-4.45804
ENSMUSG00000029053	Prkcz	4	155344586	155445818	-	101233	0.0783848	8.58841	1.49207	0.157732	0.860446	-4.46688
ENSMUSG00000001300	Efnb2	8	8667434	8711242	-	43809	-0.0710589	6.92546	-1.49174	0.157816	0.860446	-4.48827
ENSMUSG00000057541	Pus7	5	23945646	23988709	-	43064	0.102352	4.57055	1.49096	0.158019	0.860446	-4.43633
ENSMUSG00000032491	Nradd	9	110450203	110453520	-	3318	-0.255677	1.29175	-1.49074	0.158077	0.860446	-4.45335
ENSMUSG00000025979	Mob4	1	55170390	55194058	+	23669	-0.0887451	5.51996	-1.49013	0.158235	0.860446	-4.47342
ENSMUSG00000060314	Zfp941	7	140387362	140402091	-	14730	-0.0979954	5.34068	-1.4897	0.158345	0.860446	-4.46773
ENSMUSG00000032126	Hmbs	9	44247636	44255525	-	7890	0.1131	4.69333	1.48907	0.158511	0.860446	-4.44292
ENSMUSG00000108137	Gm44053	6	113702184	113703112	+	929	0.20788	0.740674	1.48857	0.158642	0.860446	-4.47388
ENSMUSG00000014873	Surf2	2	26806379	26810195	+	3817	0.0729281	4.97124	1.48824	0.158728	0.860446	-4.45499
ENSMUSG00000028051	Hcn3	3	89053381	89067503	-	14123	-0.218427	4.29813	-1.48789	0.158817	0.860446	-4.42881
ENSMUSG00000029513	Prkab1	5	116151645	116162567	-	10923	0.0895225	4.33121	1.48781	0.158839	0.860446	-4.42993
ENSMUSG00000021877	Arf4	14	26359229	26386239	+	27011	-0.0788665	6.76715	-1.48771	0.158865	0.860446	-4.49344
ENSMUSG00000057177	Gsk3a	7	24927683	24937276	-	9594	0.05861	7.67611	1.48771	0.158866	0.860446	-4.48306
ENSMUSG00000011960	Ccnt1	15	98436570	98468804	-	32235	-0.0818307	5.44178	-1.48747	0.158928	0.860446	-4.47345
ENSMUSG00000042659	Arrdc4	7	68386743	68398989	-	12247	0.113552	3.67178	1.48747	0.158928	0.860446	-4.41216
ENSMUSG00000037119	Fam91a1	15	58287317	58329589	+	42273	-0.0873769	6.461	-1.48737	0.158954	0.860446	-4.49402
ENSMUSG00000060121	Gemin2	12	59060179	59075256	+	15078	-0.13356	3.06706	-1.48721	0.158994	0.860446	-4.40987
ENSMUSG00000026080	Chst10	1	38902948	38937242	-	34295	-0.0643337	6.80557	-1.48696	0.159061	0.860446	-4.49398
ENSMUSG00000031835	Mbtps1	8	120234895	120285474	-	50580	0.111143	7.56002	1.48638	0.159212	0.860446	-4.48595
ENSMUSG00000019998	Stx7	10	24025200	24066120	+	40921	-0.0700174	6.49441	-1.48624	0.159248	0.860446	-4.49524
ENSMUSG00000024140	Epas1	17	87061128	87140838	+	79711	0.117525	7.40818	1.48564	0.159405	0.860446	-4.48872
ENSMUSG00000085881	Gm15912	13	74156128	74157473	-	1346	0.177221	2.23481	1.48558	0.15942	0.860446	-4.4254
ENSMUSG00000116506	5730414N17Rik	15	98770525	98771963	+	1439	0.263863	0.349123	1.48558	0.159422	0.860446	-4.48778
ENSMUSG00000058355	Abce1	8	80410091	80438369	-	28279	-0.0989864	6.4359	-1.48544	0.159456	0.860446	-4.49588
ENSMUSG00000075592	Nynrin	14	56091467	56112193	+	20727	-0.275365	4.101	-1.48502	0.159566	0.860446	-4.42443
ENSMUSG00000032342	Mto1	9	78355490	78382630	+	27141	-0.0805478	4.81852	-1.48494	0.159588	0.860446	-4.45223
ENSMUSG00000040035	Disp2	2	118610200	118641774	+	31575	-0.242956	8.20743	-1.48487	0.159607	0.860446	-4.47888
ENSMUSG00000040945	Rcc2	4	140427852	140450531	+	22680	0.0619125	7.02962	1.48479	0.159628	0.860446	-4.49422
ENSMUSG00000026484	Rnf2	1	151333755	151376706	-	42952	-0.119807	4.73163	-1.48398	0.159839	0.861114	-4.44962
ENSMUSG00000028426	Rad23b	4	55350043	55392237	+	42195	-0.09668	7.17906	-1.48316	0.160054	0.861114	-4.49432
ENSMUSG00000017679	Ttpal	2	163444234	163460933	+	16700	0.0614461	6.52928	1.48305	0.160084	0.861114	-4.49838
ENSMUSG00000054594	Oscar	7	3612812	3619156	-	6345	0.176448	2.06559	1.483	0.160095	0.861114	-4.43134
ENSMUSG00000056972	Magel2	7	62026758	62031388	+	4631	-0.492414	2.62967	-1.48267	0.160184	0.861128	-4.41827
ENSMUSG00000057236	Rbbp4	4	129200893	129229163	-	28271	-0.0601241	7.03719	-1.48121	0.160568	0.861956	-4.49789
ENSMUSG00000026500	Cox20	1	178146695	178150258	+	3564	-0.100031	4.26252	-1.48117	0.160577	0.861956	-4.43337
ENSMUSG00000040383	Aqr	2	113931651	114017505	-	85855	-0.123666	6.04241	-1.48077	0.160682	0.861956	-4.49631
ENSMUSG00000022136	Dnajc3	14	119175388	119219109	+	43722	-0.0794702	5.75024	-1.48071	0.160698	0.861956	-4.48971
ENSMUSG00000048007	Timm8a1	X	133438005	133442614	-	4610	-0.134233	2.47559	-1.47997	0.160893	0.861956	-4.42267
ENSMUSG00000031169	Porcn	X	8060087	8072764	-	12678	0.0620141	5.90756	1.47986	0.160923	0.861956	-4.49424
ENSMUSG00000004032	Gstm5	3	107803137	107806002	+	2866	0.0834691	7.02543	1.47931	0.161067	0.861956	-4.49977
ENSMUSG00000064360	mt-Nd3	MT	9459	9806	+	348	-0.156297	3.0391	-1.47908	0.161127	0.861956	-4.41547
ENSMUSG00000037784	Dzip1l	9	99511549	99551309	+	39761	0.106867	5.65508	1.47896	0.161161	0.861956	-4.48843
ENSMUSG00000037410	Tbc1d2b	9	90084080	90152857	-	68778	0.0778676	5.58541	1.47854	0.16127	0.861956	-4.48676
ENSMUSG00000098923	Tmem185b	1	119453890	119456713	+	2824	-0.0873994	3.98014	-1.47849	0.161284	0.861956	-4.4263
ENSMUSG00000005610	Eif4g2	7	110666957	110682237	-	15281	-0.0825354	9.18556	-1.47785	0.161453	0.8624	-4.47276
ENSMUSG00000024457	Trim26	17	37148026	37170290	+	22265	-0.082644	4.69156	-1.47732	0.161592	0.862646	-4.45406
ENSMUSG00000062040	Zfp27	7	29592758	29605997	-	13240	-0.080461	4.22676	-1.47702	0.161671	0.862646	-4.43563
ENSMUSG00000032902	Slc16a1	3	104545984	104565778	+	19795	0.0847975	4.90048	1.47582	0.161989	0.863242	-4.46384
ENSMUSG00000036104	Rab3gap1	1	127796510	127871605	+	75096	-0.0665473	7.12225	-1.47579	0.161997	0.863242	-4.50243
ENSMUSG00000020238	Ncln	10	81322083	81332226	-	10144	0.0665802	6.17922	1.47529	0.162132	0.863242	-4.50368
ENSMUSG00000107276	Gm42858	5	38291738	38293441	-	1704	-0.245711	-0.105502	-1.47526	0.162139	0.863242	-4.50362
ENSMUSG00000029516	Cit	5	115983337	116147006	+	163670	0.0732899	7.30855	1.4747	0.162286	0.863242	-4.50108
ENSMUSG00000037736	Limch1	5	66903170	67214501	+	311332	0.0957603	7.63167	1.47465	0.162299	0.863242	-4.49671
ENSMUSG00000028643	Svbp	4	119052503	119058495	+	5993	-0.125075	3.65785	-1.47397	0.16248	0.863746	-4.4224
ENSMUSG00000030083	Abtb1	6	88812896	88818966	-	6071	0.0720041	5.26644	1.4728	0.162792	0.864934	-4.48128
ENSMUSG00000041697	Cox6a1	5	115483701	115487040	-	3340	0.145209	7.93834	1.4719	0.163031	0.864934	-4.49526
ENSMUSG00000085282	Gm15663	10	105409814	105419735	+	9922	-0.126864	3.10655	-1.47174	0.163075	0.864934	-4.42009
ENSMUSG00000085894	Gm15832	1	39586651	39591083	-	4433	-0.151162	2.09118	-1.47143	0.163157	0.864934	-4.4363
ENSMUSG00000034320	Slc26a2	18	61325991	61344684	-	18694	0.116606	3.49732	1.4713	0.163192	0.864934	-4.42204
ENSMUSG00000031242	2610002M06Rik	X	106826357	106859940	-	33584	-0.111516	6.12182	-1.47119	0.163221	0.864934	-4.50729
ENSMUSG00000035007	Rundc1	11	101315911	101326499	+	10589	0.0913458	6.47701	1.47082	0.163319	0.864994	-4.51059
ENSMUSG00000029191	Rfc1	5	65419193	65493013	-	73821	-0.0632441	5.64941	-1.46968	0.163623	0.865164	-4.49772
ENSMUSG00000031696	Vps35	8	85987021	86026431	-	39411	-0.125439	7.37324	-1.46947	0.16368	0.865164	-4.50554
ENSMUSG00000027099	Mtx2	2	74656147	74708775	+	52629	-0.091075	5.35441	-1.46931	0.163722	0.865164	-4.48812
ENSMUSG00000007850	Hnrnph1	11	50267817	50277355	+	9539	-0.10917	7.82228	-1.46918	0.163757	0.865164	-4.49951
ENSMUSG00000023980	Taf8	17	47794289	47813217	-	18929	-0.0631095	4.76591	-1.46909	0.163782	0.865164	-4.46477
ENSMUSG00000033712	Ccar2	14	70375613	70391260	-	15648	-0.065937	6.96764	-1.46813	0.164038	0.865278	-4.51181
ENSMUSG00000048930	Tada3	6	113342986	113354844	-	11859	-0.0686132	5.34183	-1.46808	0.164053	0.865278	-4.48884
ENSMUSG00000097613	Gm17597	15	81684992	81686814	-	1823	0.238906	1.02408	1.46804	0.164063	0.865278	-4.47123
ENSMUSG00000029787	Avl9	6	56691884	56738897	+	47014	-0.109829	6.34232	-1.46683	0.164387	0.866313	-4.51417
ENSMUSG00000041959	S100a10	3	93462387	93471950	+	9564	0.170618	2.96163	1.46666	0.164432	0.866313	-4.42412
ENSMUSG00000026185	Igfbp5	1	72897091	72914043	-	16953	0.116331	6.93128	1.46578	0.164669	0.866683	-4.51422
ENSMUSG00000038539	Atf5	7	44461680	44466082	-	4403	0.1701	3.97889	1.46576	0.164675	0.866683	-4.43646
ENSMUSG00000041488	Stx3	19	11752482	11796767	-	44286	0.162232	5.15096	1.46524	0.164813	0.866953	-4.48389
ENSMUSG00000000787	Ddx3x	X	13147209	13160291	+	13083	-0.133979	7.62594	-1.46324	0.165352	0.867316	-4.50816
ENSMUSG00000080186	Gm14448	X	5797797	5798006	-	210	0.543837	-1.97317	1.46211	0.165658	0.867316	-4.54496
ENSMUSG00000052229	Gpr17	18	32076050	32082689	-	6640	-0.133412	6.20011	-1.46164	0.165784	0.867316	-4.51798
ENSMUSG00000050751	Pgbd5	8	125095788	125166397	-	70610	0.0822305	7.24398	1.46154	0.165812	0.867316	-4.51509
ENSMUSG00000000489	Pdgfb	15	79880075	79899178	-	19104	0.138251	4.8005	1.46106	0.165942	0.867316	-4.47319
ENSMUSG00000040048	Ndufb10	17	24941034	24943452	-	2419	0.0986288	6.9481	1.4604	0.16612	0.867316	-4.51953
ENSMUSG00000028709	Mob3c	4	115685289	115693382	+	8094	0.157574	2.91564	1.46039	0.166122	0.867316	-4.42845
ENSMUSG00000032482	Cspg5	9	110072851	110091644	+	18794	-0.070669	8.36268	-1.46038	0.166124	0.867316	-4.50091
ENSMUSG00000069631	Strada	11	106054156	106092994	-	38839	0.116304	5.54309	1.46031	0.166144	0.867316	-4.50326
ENSMUSG00000069072	Slc7a14	3	31257007	31364527	-	107521	-0.110632	7.60946	-1.4602	0.166174	0.867316	-4.51141
ENSMUSG00000021286	Zfyve21	12	111780604	111798626	+	18023	0.0866284	4.41636	1.46017	0.166181	0.867316	-4.45755
ENSMUSG00000036298	Slc2a13	15	91151899	91457464	-	305566	-0.146564	7.82071	-1.46003	0.16622	0.867316	-4.50858
ENSMUSG00000057522	Spop	11	95304906	95384232	+	79327	0.0573846	7.9202	1.45986	0.166265	0.867316	-4.50738
ENSMUSG00000024829	Mrpl21	19	3332901	3342837	+	9937	-0.0738525	4.60566	-1.45856	0.166617	0.867316	-4.46742
ENSMUSG00000019320	Noxo1	17	24915208	24919503	+	4296	-0.192674	1.36869	-1.45806	0.166753	0.867316	-4.46363
ENSMUSG00000098188	Sowahc	10	59057775	59062256	+	4482	-0.136786	3.13996	-1.45805	0.166755	0.867316	-4.42929
ENSMUSG00000040356	Skiv2l	17	35058204	35069186	-	10983	-0.0526759	6.23943	-1.45805	0.166756	0.867316	-4.52199
ENSMUSG00000108358	Gm44509	7	55623267	55624590	-	1324	0.0899506	4.27977	1.45801	0.166768	0.867316	-4.45383
ENSMUSG00000073940	Hbb-bt	7	103461731	103463203	-	1473	0.55303	3.08302	1.45784	0.166814	0.867316	-4.42947
ENSMUSG00000016494	Cd34	1	194621127	194643587	+	22461	0.128268	4.62131	1.45768	0.166857	0.867316	-4.46849
ENSMUSG00000033061	Resp18	1	75248843	75255059	-	6217	-0.325954	5.24234	-1.45704	0.167031	0.867316	-4.4956
ENSMUSG00000059482	2610301B20Rik	4	10874498	10899425	+	24928	-0.0811308	5.59314	-1.45664	0.167139	0.867316	-4.50882
ENSMUSG00000016757	Ttll12	15	83459291	83479358	-	20068	-0.103919	4.05108	-1.45658	0.167155	0.867316	-4.44661
ENSMUSG00000068921	Dap3	3	88828110	88858488	-	30379	-0.0568343	6.26618	-1.45638	0.167212	0.867316	-4.52396
ENSMUSG00000028618	Tmem59	4	107035596	107058193	+	22598	-0.058665	7.71206	-1.45622	0.167254	0.867316	-4.51387
ENSMUSG00000039156	Stim2	5	54155841	54278399	+	122559	0.0662476	6.04263	1.456	0.167315	0.867316	-4.52088
ENSMUSG00000027950	Chrnb2	3	89653502	89671939	-	18438	-0.0878687	6.35586	-1.45589	0.167345	0.867316	-4.52526
ENSMUSG00000022768	Ccdc116	16	16956928	16965093	-	8166	0.269589	2.38903	1.45588	0.167346	0.867316	-4.43807
ENSMUSG00000026766	Mmadhc	2	50169893	50186813	-	16921	-0.0554088	5.34727	-1.45572	0.16739	0.867316	-4.50099
ENSMUSG00000047844	Bex4	X	135039745	135041192	+	1448	-0.115476	4.51026	-1.45539	0.16748	0.867332	-4.46612
ENSMUSG00000038658	Ric1	19	29499682	29584229	+	84548	0.0851853	6.05519	1.45434	0.167767	0.868039	-4.52269
ENSMUSG00000041608	Entpd3	9	120368884	120397393	+	28510	-0.0887494	5.21015	-1.4541	0.167831	0.868039	-4.49726
ENSMUSG00000020074	Ccar1	10	62579707	62628065	-	48359	-0.121696	5.89963	-1.45394	0.167876	0.868039	-4.52019
ENSMUSG00000026718	Stam	2	14078909	14154445	+	75537	-0.0843695	5.87375	-1.45224	0.168339	0.869115	-4.52123
ENSMUSG00000029536	Gatc	5	115471298	115479237	-	7940	-0.0647598	5.13834	-1.45222	0.168345	0.869115	-4.49613
ENSMUSG00000028949	Smarcd3	5	24795816	24829409	-	33594	0.0779762	7.2452	1.45193	0.168425	0.869115	-4.52467
ENSMUSG00000024268	Celf4	18	25610689	25887214	-	276526	-0.0630907	9.18944	-1.45191	0.168431	0.869115	-4.49752
ENSMUSG00000025491	Ifitm1	7	140547134	140549738	+	2605	0.269575	0.977133	1.45075	0.168748	0.869907	-4.47888
ENSMUSG00000031938	4931406C07Rik	9	15194633	15217744	-	23112	0.100753	5.11281	1.45071	0.168758	0.869907	-4.49627
ENSMUSG00000022967	Ifnar1	16	91282126	91304329	+	22204	0.0631157	5.80355	1.44928	0.169152	0.87092	-4.5221
ENSMUSG00000004069	Dnaja3	16	4457853	4525559	+	67707	-0.0592493	6.07779	-1.44919	0.169175	0.87092	-4.52853
ENSMUSG00000027457	Snph	2	151432469	151474513	-	42045	0.0851717	8.61616	1.44905	0.169215	0.87092	-4.50839
ENSMUSG00000003273	Car11	7	45349267	45354106	+	4840	0.0947594	8.14011	1.44832	0.169416	0.871404	-4.51567
ENSMUSG00000021548	Ccnh	13	85337527	85371588	+	34062	-0.110981	5.65096	-1.44794	0.16952	0.871404	-4.51921
ENSMUSG00000030247	Kcnj8	6	142510563	142517340	-	6778	0.166566	2.24807	1.44764	0.169602	0.871404	-4.44513
ENSMUSG00000045055	Rpsa-ps2	10	128612240	128613119	-	880	-0.171678	1.47539	-1.44744	0.169657	0.871404	-4.46468
ENSMUSG00000002949	Timm44	8	4309731	4325913	-	16183	0.113123	6.16799	1.44642	0.169939	0.871518	-4.53234
ENSMUSG00000053574	4930563E22Rik	11	72105964	72109270	+	3307	0.175079	1.41067	1.44621	0.169997	0.871518	-4.46724
ENSMUSG00000064127	Med14	X	12541608	12628312	-	86705	-0.0840095	6.25816	-1.44579	0.170112	0.871518	-4.53448
ENSMUSG00000002984	Tomm40	7	19435238	19449363	-	14126	-0.0625215	6.18416	-1.44544	0.17021	0.871518	-4.53389
ENSMUSG00000032435	Dync1li1	9	114517858	114553370	+	35513	-0.0679724	6.49669	-1.44539	0.170223	0.871518	-4.53645
ENSMUSG00000049092	Gpr137c	14	45457174	45520182	+	63009	0.119924	5.15913	1.44517	0.170284	0.871518	-4.50339
ENSMUSG00000043091	Tuba1c	15	98927772	98935991	+	8220	-0.233447	2.62124	-1.44434	0.170514	0.871518	-4.44092
ENSMUSG00000053119	Chmp3	6	71520781	71559593	+	38813	0.082304	7.3865	1.44424	0.170541	0.871518	-4.53035
ENSMUSG00000029148	Nrbp1	5	31398208	31408910	+	10703	-0.0682913	6.17439	-1.44421	0.170549	0.871518	-4.53498
ENSMUSG00000022792	Yars2	16	16120829	16127504	+	6676	-0.104227	3.79347	-1.44403	0.170598	0.871518	-4.44866
ENSMUSG00000014786	Slc9a5	8	106075475	106096513	+	21039	0.10679	5.96994	1.44299	0.170886	0.871518	-4.53223
ENSMUSG00000038812	Trmt112	19	6887066	6888417	+	1352	-0.142407	4.05786	-1.44292	0.170908	0.871518	-4.45812
ENSMUSG00000056854	Pou3f4	X	109857886	109860813	+	2928	-0.12766	5.29564	-1.44256	0.171006	0.871518	-4.51168
ENSMUSG00000003585	Sec14l2	11	4047039	4073415	-	26377	0.103148	5.40622	1.44238	0.171055	0.871518	-4.51581
ENSMUSG00000021811	Dnajc9	14	20434706	20438978	-	4273	-0.0814627	5.25869	-1.44187	0.171198	0.871518	-4.51086
ENSMUSG00000003541	Ier3	17	36132576	36133815	+	1240	-0.106039	3.02947	-1.44186	0.171201	0.871518	-4.43999
ENSMUSG00000027193	Api5	2	94242027	94268481	-	26455	-0.0769115	6.51396	-1.44173	0.171235	0.871518	-4.54015
ENSMUSG00000046805	Mpeg1	19	12438143	12442647	+	4505	0.0840213	5.46222	1.4417	0.171244	0.871518	-4.51859
ENSMUSG00000018449	Rpain	11	70861039	70868659	+	7621	0.100034	4.53951	1.44101	0.171436	0.871659	-4.47979
ENSMUSG00000029708	Gcc1	6	28416090	28428389	-	12300	-0.0802335	4.89227	-1.44098	0.171445	0.871659	-4.49623
ENSMUSG00000014177	Tvp23b	11	62770281	62807606	+	37326	-0.0632764	4.91814	-1.44014	0.171678	0.87198	-4.49813
ENSMUSG00000082160	Gm11578	1	60631410	60631868	-	459	0.432637	-0.638248	1.43966	0.171811	0.87198	-4.52451
ENSMUSG00000061718	Ppp1r1b	11	98239230	98248622	+	9393	0.201746	10.8447	1.43899	0.171998	0.87198	-4.48832
ENSMUSG00000037243	Zfp692	11	58197895	58205453	+	7559	0.120679	5.00038	1.43891	0.17202	0.87198	-4.5025
ENSMUSG00000030282	Cmas	6	142702412	142721440	+	19029	-0.0556302	6.33051	-1.4384	0.172163	0.87198	-4.54248
ENSMUSG00000033728	Lrrc14	15	76594823	76601899	+	7077	-0.070718	4.76535	-1.43814	0.172235	0.87198	-4.49311
ENSMUSG00000047139	Cd24a	10	43454280	43460261	+	5982	-0.426784	2.80805	-1.43727	0.172478	0.87198	-4.44357
ENSMUSG00000055943	Emc7	2	112285342	112302507	+	17166	-0.0591331	6.83566	-1.43706	0.172536	0.87198	-4.54396
ENSMUSG00000052337	Immt	6	71808315	71854372	+	46058	-0.0601264	7.13805	-1.43691	0.172578	0.87198	-4.54108
ENSMUSG00000047261	Gap43	16	42068805	42161014	-	92210	-0.0962282	8.10789	-1.43663	0.172657	0.87198	-4.52746
ENSMUSG00000023966	Rsph9	17	46432961	46455142	-	22182	-0.171004	4.2531	-1.43641	0.172719	0.87198	-4.47134
ENSMUSG00000000134	Tfe3	X	7628799	7641441	+	12643	0.0638299	5.53791	1.43595	0.172849	0.87198	-4.5269
ENSMUSG00000006800	Sulf2	2	165915009	165997583	-	82575	-0.168048	6.19585	-1.43594	0.172851	0.87198	-4.54358
ENSMUSG00000019857	Asf1a	10	53472853	53485321	+	12469	-0.113817	3.50055	-1.43572	0.172913	0.87198	-4.44829
ENSMUSG00000023147	Get1	16	95946607	95959052	+	12446	-0.0826202	6.34195	-1.43523	0.173048	0.87198	-4.54576
ENSMUSG00000028114	Mettl14	3	123161946	123179757	-	17812	-0.0662136	4.62756	-1.43517	0.173066	0.87198	-4.48941
ENSMUSG00000022765	Snap29	16	17223850	17248691	+	24842	-0.090064	4.89022	-1.43514	0.173075	0.87198	-4.50153
ENSMUSG00000030533	Unc45a	7	79975040	79997741	-	22702	-0.0632317	5.30353	-1.43501	0.173109	0.87198	-4.51915
ENSMUSG00000024160	Spsb3	17	25105617	25111126	+	5510	0.0629556	5.60325	1.43483	0.173161	0.87198	-4.53021
ENSMUSG00000029581	Fscn1	5	142946098	142958940	+	12843	0.0881852	7.49441	1.43406	0.173377	0.872082	-4.53884
ENSMUSG00000027270	Lamp5	2	135894159	135911837	+	17679	0.179111	6.97438	1.4335	0.173535	0.872082	-4.54595
ENSMUSG00000031367	Ap1s2	X	162692013	162716662	+	24650	-0.148772	6.23077	-1.43296	0.173684	0.872082	-4.54695
ENSMUSG00000033022	Cdo1	18	46846260	46861462	-	15203	-0.0991754	5.50567	-1.43293	0.173695	0.872082	-4.52887
ENSMUSG00000030701	Plekhb1	7	100292099	100311621	-	19523	0.101243	8.47483	1.43278	0.173737	0.872082	-4.52604
ENSMUSG00000043496	Tril	6	53792453	53797815	-	5363	-0.157698	5.72165	-1.43255	0.173799	0.872082	-4.53644
ENSMUSG00000031432	Prps1	X	139357362	139376889	+	19528	-0.0604332	6.28014	-1.43222	0.173894	0.872082	-4.54819
ENSMUSG00000039747	Orai2	5	136176313	136199567	-	23255	0.0631719	6.79903	1.43217	0.173909	0.872082	-4.5489
[truncated: 8,027 more rows]

## Sheet: S4 - Diff. Exp. {Walker}
Original Gene ID	Gene Name	Chr	Start	End	Strand	Length	logFC	AveExpr	t	P.Value	adj.P.Val	B
ENSMUSG00000021250	Fos	12	85520664	85524047	+	3384	-0.785828	4.83	-6.88261	3.97762e-05	0.395693	-2.15829
ENSMUSG00000020423	Btg2	1	134002908	134006858	-	3951	-0.562626	4.27691	-4.6114	0.000926469	0.980572	-2.90501
ENSMUSG00000022528	Hes1	16	29883202	29886614	+	3413	-0.628437	1.56039	-3.84744	0.00313899	0.980572	-3.95552
ENSMUSG00000078601		3	108268867	108269572	+	706	-1.01269	-1.43474	-3.84369	0.00315842	0.980572	-4.34731
ENSMUSG00000101249	Gm29216	1	24654787	24655278	-	492	-1.21617	0.854725	-3.78928	0.00345517	0.980572	-4.09056
ENSMUSG00000022769	Sdf2l1	16	16948002	16950247	-	2246	-0.616109	3.86563	-3.58165	0.0048823	0.980572	-3.41513
ENSMUSG00000040435	Ppp1r15a	7	45172340	45175692	-	3353	-0.427757	3.89063	-3.44558	0.00613886	0.980572	-3.47301
ENSMUSG00000039910	Cited2	10	17598966	17601422	+	2457	-0.43881	5.43878	-3.33477	0.00740694	0.980572	-3.23522
ENSMUSG00000056116	H2-T22	17	36348020	36353639	-	5620	-0.261226	4.08967	-3.30823	0.00774896	0.980572	-3.47778
ENSMUSG00000056749		13	53121245	53135109	-	13865	-0.388778	3.15027	-3.30417	0.00780267	0.980572	-3.7187
ENSMUSG00000043671	Dpy19l3	7	35384590	35453879	-	69290	0.341775	7.53647	3.30417	0.00780273	0.980572	-3.33905
ENSMUSG00000021367	Edn1	13	42454952	42461466	+	6515	-0.714496	1.67088	-3.27276	0.00823142	0.980572	-4.04198
ENSMUSG00000107553	Gm44266	6	138577840	138578339	+	500	1.31139	-2.30705	3.26369	0.00835964	0.980572	-4.42201
ENSMUSG00000061232	H2-K1	17	34214991	34219321	-	4331	-0.526456	4.34911	-3.23419	0.00879125	0.980572	-3.44885
ENSMUSG00000032575	Manf	9	106715511	106769178	-	53668	-0.328737	5.83335	-3.18508	0.00956096	0.980572	-3.31124
ENSMUSG00000044562	Rasip1	7	45276912	45288517	+	11606	-0.47214	3.17404	-3.18455	0.00956959	0.980572	-3.75234
ENSMUSG00000100396	Gm29367	4	141603018	141604344	+	1327	-0.635828	-0.010687	-3.12844	0.0105348	0.980572	-4.29184
ENSMUSG00000032308	Ulk3	9	57496735	57503516	+	6782	0.246701	4.86984	3.10673	0.0109344	0.980572	-3.41708
ENSMUSG00000067279	Ppp1r3c	19	36709131	36714053	-	4923	-0.300463	5.70689	-3.09815	0.0110965	0.980572	-3.36627
ENSMUSG00000020846	Rflnb	11	75910020	75918608	-	8589	-0.466007	3.26732	-3.08525	0.0113449	0.980572	-3.76822
ENSMUSG00000064357	mt-Atp6	MT	7927	8607	+	681	-1.00623	-0.0700802	-3.07775	0.0114919	0.980572	-4.29594
ENSMUSG00000066510	Ankdd1a	9	65395752	65427475	-	31724	0.408883	4.27041	3.07597	0.0115272	0.980572	-3.5499
ENSMUSG00000063632	Sox11	12	27384263	27392573	-	8311	-0.273996	5.34762	-3.0754	0.0115385	0.980572	-3.39114
ENSMUSG00000003123	Lipe	7	25078952	25098135	-	19184	-0.358294	3.93753	-2.9944	0.0132626	0.980572	-3.65918
ENSMUSG00000078490		4	155493647	155551280	+	57634	0.294922	5.38399	2.98868	0.013394	0.980572	-3.44492
ENSMUSG00000075602	Ly6a	15	74866726	74869880	-	3155	-0.514591	4.78269	-2.98512	0.0134762	0.980572	-3.50108
ENSMUSG00000108421	Gm44718	7	63415622	63415980	+	359	-0.787309	-1.01017	-2.97693	0.0136677	0.980572	-4.39016
ENSMUSG00000002274	Metrn	17	26012195	26016110	-	3916	-0.27452	3.77735	-2.9552	0.0141889	0.980572	-3.71327
ENSMUSG00000081944	Gm12276	11	62222247	62222547	+	301	-0.612652	0.651464	-2.9448	0.0144454	0.980572	-4.25758
ENSMUSG00000024042	Sik1	17	32063224	32074778	-	11555	-0.314414	4.58945	-2.93285	0.014746	0.980572	-3.56218
ENSMUSG00000071637		16	15705150	15708895	+	3746	-0.578402	2.66324	-2.92375	0.0149792	0.980572	-3.95145
ENSMUSG00000045903	Npas4	19	5034383	5040344	-	5962	-0.574783	5.30669	-2.91766	0.0151372	0.980572	-3.50905
ENSMUSG00000037447		1	36346814	36363110	+	16297	-0.396559	3.6367	-2.91374	0.0152398	0.980572	-3.75555
ENSMUSG00000091742	Gm5093	17	46750504	46751023	-	520	-0.75431	-0.728568	-2.91009	0.0153363	0.980572	-4.37385
ENSMUSG00000030218	Mgp	6	136849433	136852821	-	3389	-0.630974	3.02804	-2.8984	0.0156485	0.980572	-3.89547
ENSMUSG00000053560	Ier2	8	85387960	85389483	-	1524	-0.627747	1.39751	-2.89598	0.015714	0.980572	-4.17022
ENSMUSG00000028184	Adgrl2	3	148521219	148696191	-	174973	0.28421	7.15794	2.89202	0.0158216	0.980572	-3.54449
ENSMUSG00000030790	Adm	7	110226868	110229027	+	2160	-0.781681	-0.130268	-2.88142	0.0161136	0.980572	-4.33764
ENSMUSG00000046999	1110032F04Rik	3	68776919	68779496	+	2578	-0.497145	1.77963	-2.85598	0.0168366	0.980572	-4.11645
ENSMUSG00000025492	Ifitm3	7	140589499	140590683	-	1185	-0.545892	2.92361	-2.85514	0.0168613	0.980572	-3.92531
ENSMUSG00000105736	Gm42456	5	137272355	137286924	-	14570	0.394048	4.39078	2.84233	0.017238	0.980572	-3.64459
ENSMUSG00000025408	Ddit3	10	127126643	127132157	+	5515	-0.421614	4.25864	-2.82075	0.0178924	0.980572	-3.68323
ENSMUSG00000002324	Rec8	14	55855494	55862852	+	7359	-0.438601	3.59775	-2.79079	0.0188426	0.980572	-3.81908
ENSMUSG00000030157	Clec2d	6	129157578	129163497	+	5920	-0.676239	1.88602	-2.78895	0.0189025	0.980572	-4.12148
ENSMUSG00000052684	Jun	4	94937271	94940459	-	3189	-0.365374	5.03639	-2.77573	0.019339	0.980572	-3.6049
ENSMUSG00000021182	Ccdc88c	12	100877782	100995315	-	117534	0.364337	7.14832	2.76542	0.0196868	0.980572	-3.61691
ENSMUSG00000069808	Tlcd3a	11	76070497	76105653	+	35157	0.232811	5.65502	2.74711	0.0203193	0.980572	-3.58591
ENSMUSG00000073411	H2-D1	17	35481706	35486475	+	4770	-0.345424	4.83074	-2.74658	0.0203379	0.980572	-3.63805
ENSMUSG00000082284	H3f3a-ps1	X	100868121	100868530	+	410	-0.950237	-0.516165	-2.74489	0.0203973	0.980572	-4.38213
ENSMUSG00000035929	H2-Q4	17	35598593	35604266	+	5674	-0.634952	1.71502	-2.72776	0.0210099	0.980572	-4.15491
ENSMUSG00000030339	Ltbr	6	125283534	125290848	-	7315	-0.327689	2.91977	-2.70815	0.0217341	0.980572	-3.98301
ENSMUSG00000034640	Tiparp	3	65435831	65462939	+	27109	-0.290813	5.21712	-2.70772	0.0217501	0.980572	-3.62785
ENSMUSG00000097287	D130017N08Rik	5	143744109	143754330	+	10222	0.22034	4.7655	2.69491	0.0222368	0.980572	-3.67151
ENSMUSG00000031609	Sap30	8	57935741	57940894	-	5154	-0.426803	1.99613	-2.69249	0.0223299	0.980572	-4.12892
ENSMUSG00000090698	Apold1	6	134958681	134963799	+	5119	-0.630458	3.35287	-2.6887	0.0224765	0.980572	-3.91577
ENSMUSG00000021453	Gadd45g	13	52000714	52002504	+	1791	-0.544824	3.80481	-2.6823	0.0227264	0.980572	-3.84205
ENSMUSG00000000167		9	50528621	50536300	+	7680	0.398594	1.88932	2.67779	0.0229045	0.980572	-4.1586
ENSMUSG00000037239	Spred3	7	28858254	28869836	-	11583	0.323843	6.05211	2.67443	0.0230375	0.980572	-3.62864
ENSMUSG00000078816	Prkcg	7	3337704	3379615	+	41912	0.2605	8.07012	2.66094	0.023581	0.980572	-3.72734
ENSMUSG00000117505	Gm9993	18	7868018	7869113	-	1096	0.837362	-1.09508	2.6351	0.024657	0.980572	-4.43441
ENSMUSG00000038822		10	45453925	45588441	+	134517	0.210673	6.2197	2.63493	0.0246645	0.980572	-3.65495
ENSMUSG00000085609	1700016P03Rik	11	75063386	75068459	+	5074	-0.652534	5.52899	-2.62352	0.0251551	0.980572	-3.68104
ENSMUSG00000036357	Gpr101	X	56542028	56549117	-	7090	0.683222	5.66366	2.61879	0.0253613	0.980572	-3.6737
ENSMUSG00000070436	Serpinh1	7	98994583	99002446	-	7864	-0.322606	4.36781	-2.60277	0.0260727	0.980572	-3.78393
ENSMUSG00000027800	Tm4sf1	3	57193032	57209409	-	16378	-0.408369	3.27926	-2.57445	0.0273791	0.980572	-3.98045
ENSMUSG00000047867		6	48678516	48685159	-	6644	-0.414883	2.31441	-2.55846	0.0281448	0.980572	-4.12109
ENSMUSG00000020241	Col6a2	10	76431596	76459464	-	27869	0.319931	4.8768	2.54866	0.028625	0.980572	-3.75937
ENSMUSG00000056313		8	24927196	24929000	-	1805	-0.795068	1.13191	-2.54633	0.0287401	0.980572	-4.27296
ENSMUSG00000020205	Phlda1	10	111342147	111344506	+	2360	-0.296019	5.04914	-2.54565	0.0287739	0.980572	-3.74163
ENSMUSG00000019960	Dusp6	10	99099093	99103351	+	4259	-0.432162	5.22405	-2.52075	0.0300365	0.980572	-3.75336
ENSMUSG00000063260		15	89666596	89726063	-	59468	0.610238	4.73039	2.51912	0.0301212	0.980572	-3.79398
ENSMUSG00000025491	Ifitm1	7	140547134	140549738	+	2605	-0.612748	1.18938	-2.51619	0.0302736	0.980572	-4.27359
ENSMUSG00000071001	Hrct1	4	43727188	43728639	+	1452	-0.627248	-0.265072	-2.50877	0.0306631	0.980572	-4.39328
ENSMUSG00000036840	Siah1a	8	87450635	87472562	-	21928	-0.240609	4.44898	-2.50841	0.0306822	0.980572	-3.82491
ENSMUSG00000072941	Sod3	5	52521133	52528760	+	7628	-0.30593	3.12266	-2.4965	0.0313186	0.980572	-4.02927
ENSMUSG00000074384	AI429214	8	37460758	37462687	+	1930	0.397105	1.29684	2.49476	0.0314126	0.980572	-4.27348
ENSMUSG00000023034	Nr4a1	15	101152150	101172676	+	20527	-0.464146	7.14461	-2.48987	0.0316785	0.980572	-3.78934
ENSMUSG00000048489	Depp1	6	116627570	116629755	+	2186	-0.50782	1.80827	-2.47417	0.0325466	0.980572	-4.2142
ENSMUSG00000037211	Spry1	3	37694096	37698747	+	4652	-0.234148	3.47648	-2.46911	0.0328317	0.980572	-3.99135
ENSMUSG00000026864	Hspa5	2	34661982	34667559	+	5578	-0.310965	8.80517	-2.46692	0.0329555	0.980572	-3.86761
ENSMUSG00000001627	Ifrd1	12	40251566	40298503	-	46938	-0.244184	5.44045	-2.46364	0.0331422	0.980572	-3.77731
ENSMUSG00000040620	Dhx33	11	70874917	70895263	-	20347	0.241003	5.64054	2.45502	0.033638	0.980572	-3.77822
ENSMUSG00000085035	Gm12031	11	20095567	20096344	-	778	0.960958	-1.62794	2.44996	0.0339319	0.980572	-4.4679
ENSMUSG00000090936		17	35384095	35386162	+	2068	-0.419873	0.216214	-2.44613	0.0341567	0.980572	-4.36885
ENSMUSG00000046718	Bst2	8	71986899	71990100	-	3202	-0.456978	1.07765	-2.44507	0.0342191	0.980572	-4.30052
ENSMUSG00000038612	Mcl1	3	95566099	95570487	+	4389	-0.210991	6.19703	-2.44249	0.0343713	0.980572	-3.78435
ENSMUSG00000015656	Hspa8	9	40712280	40721383	+	9104	-0.223765	10.2589	-2.43772	0.0346544	0.980572	-3.93619
ENSMUSG00000029360	Gm9754	5	118203425	118207775	+	4351	0.530203	2.73321	2.43696	0.0346994	0.980572	-4.11292
ENSMUSG00000042116	Vwa1	4	155852606	155859155	-	6550	-0.281186	4.7789	-2.41967	0.0357471	0.980572	-3.83892
ENSMUSG00000014226	Cacybp	1	160029937	160040445	-	10509	-0.25702	6.3224	-2.41872	0.0358057	0.980572	-3.80323
ENSMUSG00000040543	Pitpnm3	11	71938354	72026604	-	88251	0.320028	6.57566	2.41452	0.0360652	0.980572	-3.81142
ENSMUSG00000019874	Fabp7	10	57660977	57664546	+	3570	-0.369146	3.77435	-2.40945	0.0363808	0.980572	-3.97664
ENSMUSG00000036478	Btg1	10	96452868	96458671	+	5804	-0.263373	5.44197	-2.40522	0.0366461	0.980572	-3.81762
ENSMUSG00000040822	1700123O20Rik	14	54923673	54928198	+	4526	-0.238909	3.85029	-2.40067	0.0369335	0.980572	-3.97078
ENSMUSG00000031897	Psmb10	8	106662367	106665076	-	2710	-0.365694	3.67222	-2.39763	0.0371269	0.980572	-3.99327
ENSMUSG00000053113		11	117856905	117860873	-	3969	-1.55067	0.980632	-2.39324	0.0374083	0.980572	-4.31796
ENSMUSG00000030592	Ryr1	7	28702769	28824604	-	121836	0.233574	6.78109	2.3868	0.0378244	0.980572	-3.84025
ENSMUSG00000045730	Adrb2	18	62310887	62313030	-	2144	0.430044	0.518253	2.3831	0.0380657	0.980572	-4.36164
ENSMUSG00000085622	3110056K07Rik	12	71038389	71062606	-	24218	-0.253908	5.08483	-2.38286	0.038081	0.980572	-3.84478
ENSMUSG00000045996	Polr2k	15	36174156	36177156	+	3001	-0.355744	3.32204	-2.3806	0.038229	0.980572	-4.05995
ENSMUSG00000056501	Cebpb	2	167530835	167532338	+	1504	-0.387442	1.28264	-2.38041	0.0382417	0.980572	-4.29973
ENSMUSG00000049649	Gpr3	4	132936651	132939847	-	3197	-0.435866	2.33289	-2.37519	0.038586	0.980572	-4.18369
ENSMUSG00000078485	Plekhn1	4	156305913	156314174	-	8262	0.259866	4.46708	2.36539	0.0392404	0.980572	-3.90868
ENSMUSG00000079018	Ly6c1	15	74915867	74920679	-	4813	-0.296321	5.26453	-2.36244	0.0394394	0.980572	-3.84969
ENSMUSG00000042745	Id1	2	152578171	152579330	+	1160	-0.413257	3.55407	-2.36146	0.0395062	0.980572	-4.0278
ENSMUSG00000021647	Cartpt	13	100034997	100037599	-	2603	-0.616362	5.58161	-2.36117	0.0395257	0.980572	-3.84787
ENSMUSG00000026458	Ppfia4	1	134224521	134260666	-	36146	0.223241	7.32753	2.36066	0.0395603	0.980572	-3.88056
ENSMUSG00000052837	Junb	8	85701113	85705347	-	4235	-0.465321	6.10045	-2.35988	0.039613	0.980572	-3.84493
ENSMUSG00000111547		9	20517429	20518912	-	1484	0.523535	-0.442704	2.35704	0.0398066	0.980572	-4.42652
ENSMUSG00000037868	Egr2	10	67371305	67378018	+	6714	-0.586795	3.72847	-2.35203	0.0401499	0.980572	-4.01651
ENSMUSG00000046675	Tmem251	12	102710021	102713820	+	3800	-0.345788	3.42405	-2.34921	0.0403449	0.980572	-4.05294
ENSMUSG00000026017		1	60137406	60193112	+	55707	0.189937	5.03952	2.34835	0.040404	0.980572	-3.86811
ENSMUSG00000090877	Hspa1b	17	35175412	35178214	-	2803	-0.997879	3.36591	-2.34679	0.0405124	0.980572	-4.05904
ENSMUSG00000102305		9	72931575	72933421	+	1847	-0.435129	0.145317	-2.3454	0.0406092	0.980572	-4.39221
ENSMUSG00000005078	Jkamp	12	72132363	72148235	+	15873	-0.184022	5.80967	-2.33626	0.0412503	0.980572	-3.85548
ENSMUSG00000021680	Crhbp	13	95567879	95581432	-	13554	-0.439227	2.95691	-2.3329	0.0414884	0.980572	-4.12154
ENSMUSG00000085782	Gm15624	6	83143134	83149737	-	6604	0.401748	2.7234	2.33281	0.0414947	0.980572	-4.14808
ENSMUSG00000051495	Irf2bp2	8	127315035	127320725	-	5691	-0.178609	5.63794	-2.32517	0.0420414	0.980572	-3.8658
ENSMUSG00000038069	Cdkn2aip	8	48162379	48166967	-	4589	-0.194583	4.3195	-2.31686	0.0426446	0.980572	-3.94919
ENSMUSG00000080316	Spaca6	17	18047420	18063271	+	15852	0.221101	5.53523	2.31674	0.0426531	0.980572	-3.87291
ENSMUSG00000035576		2	162785392	162816442	+	31051	0.483185	4.57959	2.31633	0.0426833	0.980572	-3.9254
ENSMUSG00000118099	Gm31356	19	55087934	55106247	+	18314	0.242789	5.0927	2.31501	0.0427793	0.980572	-3.88848
ENSMUSG00000027712	Anxa5	3	36503072	36530043	-	26972	-0.20998	5.13234	-2.31403	0.0428516	0.980572	-3.88882
ENSMUSG00000117613		18	15327839	15347753	+	19915	0.40475	3.38355	2.31375	0.0428717	0.980572	-4.06843
ENSMUSG00000052848		5	111729288	111752798	+	23511	0.383999	3.66752	2.30486	0.0435293	0.980572	-4.04226
ENSMUSG00000060802	B2m	2	121978167	121983564	+	5398	-0.395993	5.8284	-2.29994	0.0438973	0.980572	-3.88073
ENSMUSG00000116779	Gm4829	17	3151418	3152011	-	594	-0.473839	-0.479304	-2.29698	0.0441203	0.980572	-4.43404
ENSMUSG00000042406	Atf4	15	80139385	80141742	+	2358	-0.213549	6.33476	-2.28699	0.0448806	0.980572	-3.8917
ENSMUSG00000022048	Dpysl2	14	67040313	67106137	-	65825	-0.197143	7.82038	-2.27563	0.0457603	0.980572	-3.95052
ENSMUSG00000026822		2	32274645	32278264	-	3620	-1.18024	3.85743	-2.27235	0.0460172	0.980572	-4.02538
ENSMUSG00000019797	Mtres1	10	43401129	43416990	-	15862	-0.24562	4.35476	-2.25695	0.0472434	0.980572	-3.98614
ENSMUSG00000112721	Gm35608	10	76520266	76522635	+	2370	0.428266	0.558172	2.251	0.0477258	0.980572	-4.38088
ENSMUSG00000055923	Aasdh	5	77021506	77053361	-	31856	0.305191	4.82889	2.24657	0.0480877	0.980572	-3.94626
ENSMUSG00000026728	Vim	2	13578738	13587637	+	8900	-0.293314	4.81937	-2.24262	0.0484131	0.980572	-3.95905
ENSMUSG00000050022	Amz1	5	140709882	140747194	+	37313	0.243581	5.55315	2.24048	0.04859	0.980572	-3.9238
ENSMUSG00000037214	Thap1	8	26648169	26654179	+	6011	-0.305049	3.47765	-2.23798	0.048798	0.980572	-4.09507
ENSMUSG00000023272	Creld2	15	88703849	88710886	+	7038	-0.250574	4.90062	-2.23746	0.0488413	0.980572	-3.95238
ENSMUSG00000004951	Hspb1	5	135916773	135918417	+	1645	-0.535143	3.07067	-2.23138	0.04935	0.980572	-4.14683
ENSMUSG00000052759	Gpr25	1	136187535	136188611	-	1077	0.449612	0.487649	2.22525	0.0498684	0.980572	-4.39376
ENSMUSG00000036295	Lrrn3	12	41501667	41536430	-	34764	-0.217166	6.85284	-2.22331	0.0500328	0.980572	-3.94971
ENSMUSG00000037095		17	56426678	56429001	-	2324	-1.32208	0.78303	-2.22196	0.050148	0.980572	-4.36266
ENSMUSG00000035711	Dok3	13	55671044	55677109	-	6066	-0.219613	4.82924	-2.21965	0.0503458	0.980572	-3.96867
ENSMUSG00000026826	Nr4a2	2	56996842	57014015	-	17174	-1.32397	2.01391	-2.21865	0.0504315	0.980572	-4.27553
ENSMUSG00000028445	Enho	4	41638144	41640324	-	2181	-0.2516	4.93481	-2.21363	0.050865	0.980572	-3.96475
ENSMUSG00000010095	Slc3a2	19	8684246	8700733	-	16488	-0.162881	6.60863	-2.21349	0.0508773	0.980572	-3.94679
ENSMUSG00000112980	D430020J02Rik	12	116365567	116368830	-	3264	0.379942	2.02288	2.20555	0.051569	0.980572	-4.26981
ENSMUSG00000091971	Hspa1a	17	35188166	35191132	-	2967	-0.959034	2.81707	-2.20428	0.0516806	0.980572	-4.18361
ENSMUSG00000022602	Arc	15	74540932	74544419	-	3488	-0.580785	6.96737	-2.20032	0.0520306	0.980572	-3.96904
ENSMUSG00000028195	Ccn1	3	145352731	145355736	-	3006	-0.309818	3.13347	-2.19932	0.0521191	0.980572	-4.1564
ENSMUSG00000115610	Gm31251	14	55216850	55229058	+	12209	0.261518	3.53983	2.1925	0.0527263	0.980572	-4.11864
ENSMUSG00000097326	A330048O09Rik	13	48425889	48427360	-	1472	-0.38744	0.521307	-2.19205	0.0527667	0.980572	-4.39775
ENSMUSG00000027080	Med19	2	84508746	84518559	+	9814	-0.186993	5.01015	-2.18698	0.0532237	0.980572	-3.97726
ENSMUSG00000031328	Flna	X	73267067	73293426	-	26360	0.287689	7.17104	2.18625	0.0532903	0.980572	-3.9835
ENSMUSG00000034616	Ssh3	19	4311696	4319208	-	7513	0.216621	5.79026	2.18591	0.0533207	0.980572	-3.95805
ENSMUSG00000112977	Gm34081	12	109459455	109482666	-	23212	0.37898	3.87116	2.18365	0.0535263	0.980572	-4.0848
ENSMUSG00000020492	Ska2	11	87000060	87015461	+	15402	-0.172572	4.76085	-2.17615	0.0542123	0.980572	-3.99287
ENSMUSG00000019338	Zfp687	3	94913901	94922759	-	8859	0.214159	5.18085	2.1737	0.0544382	0.980572	-3.97778
ENSMUSG00000024349	Sting1	18	35866732	35873607	-	6876	-0.407538	2.01662	-2.17294	0.0545082	0.980572	-4.2754
ENSMUSG00000019789		10	30708355	30718797	-	10443	-0.254254	2.71261	-2.17014	0.0547685	0.980572	-4.20661
ENSMUSG00000038608	Dock10	1	80478790	80736244	-	257455	0.269986	7.50723	2.16803	0.0549646	0.980572	-4.00724
ENSMUSG00000035686	Thrsp	7	97062145	97066937	-	4793	-0.41937	2.19171	-2.16518	0.0552318	0.980572	-4.26159
ENSMUSG00000074807	Gm10762	2	128807425	128809964	-	2540	-0.398178	0.968887	-2.16426	0.0553181	0.980572	-4.37064
ENSMUSG00000045314	Sowahb	5	93188982	93192881	-	3900	-0.562771	1.85491	-2.16351	0.0553884	0.980572	-4.29805
ENSMUSG00000020475	Pgam2	11	5751640	5753733	-	2094	-0.613051	1.827	-2.16328	0.0554102	0.980572	-4.31179
ENSMUSG00000053746	Ptrh1	2	32665798	32667609	+	1812	-0.438834	1.12359	-2.16291	0.0554447	0.980572	-4.36029
ENSMUSG00000067367	Lyar	5	38377814	38391650	+	13837	-0.257553	3.15386	-2.1601	0.0557098	0.980572	-4.16931
ENSMUSG00000092118	Fancf	7	51510325	51512015	-	1691	-0.352036	1.00233	-2.15987	0.0557315	0.980572	-4.36532
ENSMUSG00000108402	9430064I24Rik	7	127399266	127401934	-	2669	-0.320503	1.87882	-2.1565	0.0560503	0.980572	-4.29422
ENSMUSG00000062151	Unc13c	9	73386704	73876248	-	489545	0.453203	8.05665	2.15627	0.0560725	0.980572	-4.02905
ENSMUSG00000017692	Rhbdl3	11	80191738	80246781	+	55044	0.169927	6.31377	2.15442	0.0562484	0.980572	-3.97909
ENSMUSG00000024966	Stip1	19	6998070	7017335	-	19266	-0.207921	7.7348	-2.15262	0.0564208	0.980572	-4.02266
ENSMUSG00000072847	A530017D24Rik	11	61755394	61758884	-	3491	-0.246289	4.26012	-2.14916	0.0567529	0.980572	-4.05282
ENSMUSG00000076431	Sox4	13	29132902	29137696	-	4795	-0.223398	4.10735	-2.14823	0.056842	0.980572	-4.07848
ENSMUSG00000068220	Lgals1	15	78810925	78814665	+	3741	-0.496963	1.68987	-2.14476	0.0571771	0.980572	-4.32066
ENSMUSG00000020340	Cyfip2	11	46084677	46203686	-	119010	0.245646	9.82242	2.13989	0.0576515	0.980572	-4.08289
ENSMUSG00000053861	Gm9925	18	74198173	74198655	+	483	0.490997	0.418713	2.13941	0.0576978	0.980572	-4.41297
ENSMUSG00000013707	Tnfaip8l2	3	95046832	95049671	-	2840	-0.474433	0.630561	-2.13801	0.057835	0.980572	-4.3979
ENSMUSG00000032763	Ilvbl	10	78410180	78420336	+	10157	0.207972	4.31624	2.13285	0.0583429	0.980572	-4.06119
ENSMUSG00000051439	Cd14	18	36858120	36859851	-	1732	-0.927365	2.07725	-2.12814	0.0588101	0.980572	-4.28032
ENSMUSG00000048572		19	24651372	24659597	+	8226	-1.10198	2.57665	-2.12695	0.0589284	0.980572	-4.23717
ENSMUSG00000022210	Dhrs4	14	55716215	55727797	+	11583	-0.289505	3.44006	-2.12607	0.0590161	0.980572	-4.15456
ENSMUSG00000095742		JH584295.1	66	1479	-	1414	-0.534319	2.02116	-2.12455	0.0591676	0.980572	-4.29347
ENSMUSG00000058498	Rnf207	4	152391476	152403450	-	11975	0.253585	4.74788	2.12427	0.0591964	0.980572	-4.03605
ENSMUSG00000041120	Nbl1	4	138809595	138820304	-	10710	-0.254434	3.84694	-2.1225	0.0593739	0.980572	-4.11608
ENSMUSG00000024338	Psmb8	17	34416695	34420428	+	3734	-0.419963	1.2617	-2.12242	0.059382	0.980572	-4.35616
ENSMUSG00000074796	Slc4a11	2	130526033	130539439	-	13407	0.310656	4.64801	2.12232	0.0593913	0.980572	-4.04575
ENSMUSG00000103082	Gm38124	3	45224422	45227002	-	2581	-0.372477	0.692089	-2.12189	0.0594353	0.980572	-4.3948
ENSMUSG00000051351	Zfp46	4	136011994	136021253	+	9260	0.176142	5.48168	2.12172	0.0594525	0.980572	-4.00482
ENSMUSG00000021508	Cxcl14	13	56436456	56444364	-	7909	-0.345345	6.19033	-2.12009	0.0596167	0.980572	-4.00398
ENSMUSG00000079654	Prrt4	6	29169231	29179583	-	10353	0.306874	4.23073	2.11878	0.059748	0.980572	-4.076
ENSMUSG00000019997	Ccn2	10	24471340	24474581	+	3242	-0.950085	2.76049	-2.11811	0.0598159	0.980572	-4.22781
ENSMUSG00000028341		4	48045153	48086447	+	41295	-0.395206	6.20884	-2.11575	0.0600554	0.980572	-4.00623
ENSMUSG00000026843	Fubp3	2	31462663	31507538	+	44876	0.181452	5.81678	2.11571	0.0600593	0.980572	-4.00482
ENSMUSG00000097574	C920006O11Rik	9	78083196	78086161	+	2966	0.293826	2.13932	2.11409	0.060224	0.980572	-4.28723
ENSMUSG00000031770	Herpud1	8	95113066	95122005	+	8940	-0.224475	5.93275	-2.10665	0.0609862	0.980572	-4.01104
ENSMUSG00000105592		9	111240502	111241981	+	1480	0.447818	0.253961	2.10366	0.0612955	0.980572	-4.42469
ENSMUSG00000058281		2	102929500	102929946	+	447	0.722192	-1.87134	2.10188	0.0614794	0.980572	-4.50418
ENSMUSG00000073838	Tufm	7	126086533	126089903	+	3371	-0.170721	5.23682	-2.10095	0.0615759	0.980572	-4.02614
ENSMUSG00000025283	Sat1	X	153996128	153999445	-	3318	-0.260542	5.46195	-2.10053	0.0616198	0.980572	-4.02014
ENSMUSG00000050732	Vamp8	6	72362206	72367686	-	5481	-0.368317	2.25464	-2.09989	0.0616864	0.980572	-4.28465
ENSMUSG00000028063	Lmna	3	88387454	88417263	-	29810	-0.207334	4.27961	-2.09961	0.0617155	0.980572	-4.08473
ENSMUSG00000069045	Ddx3y	Y	1260771	1286629	-	25859	-0.302306	6.01248	-2.0995	0.0617272	0.980572	-4.01604
ENSMUSG00000024014	Pim1	17	29709727	29715086	+	5360	-0.465853	1.65334	-2.0987	0.0618106	0.980572	-4.33374
ENSMUSG00000038539	Atf5	7	44461680	44466082	-	4403	-0.244557	3.72796	-2.0982	0.0618626	0.980572	-4.14003
ENSMUSG00000049892	Rasd1	11	59854007	59855770	-	1764	-0.386811	3.7037	-2.09652	0.0620389	0.980572	-4.1397
ENSMUSG00000036062	Phf24	4	42916660	42944752	+	28093	0.259802	9.05903	2.09019	0.0627055	0.980572	-4.09093
ENSMUSG00000026235	Epha4	1	77343822	77491725	-	147904	0.220123	7.64833	2.08572	0.0631798	0.980572	-4.06221
ENSMUSG00000041936	Agrn	4	156249747	156281945	-	32199	0.24717	8.06126	2.08363	0.0634035	0.980572	-4.07273
ENSMUSG00000047965	Rpl9-ps7	2	70289326	70289904	+	579	-1.03265	-2.05358	-2.08315	0.0634538	0.980572	-4.50689
ENSMUSG00000022893	Adamts1	16	85590715	85600001	-	9287	-0.82334	3.35277	-2.08271	0.0635015	0.980572	-4.17622
ENSMUSG00000119223	Mir3070b	12	109555026	109555114	+	89	0.697964	-0.851873	2.08257	0.0635167	0.980572	-4.47824
ENSMUSG00000025823	Pdia4	6	47773075	47790364	-	17290	-0.280034	6.19506	-2.07826	0.0639795	0.980572	-4.03096
ENSMUSG00000003411	Rab3b	4	108736260	108800521	+	64262	-0.374995	5.57	-2.07564	0.0642626	0.980572	-4.03482
ENSMUSG00000067929	Gm10226	17	21910767	21911021	+	255	-0.476497	-0.0135417	-2.07429	0.064409	0.980572	-4.44215
ENSMUSG00000052981	Ube2ql1	13	69850951	69888008	-	37058	-0.164351	6.31132	-2.07221	0.0646349	0.980572	-4.0367
ENSMUSG00000030757	Zkscan2	7	123074607	123099672	-	25066	0.280449	5.67608	2.07037	0.0648359	0.980572	-4.0366
ENSMUSG00000071072	Ptges3	10	127894823	127913141	+	18319	-0.260551	6.38056	-2.07002	0.0648746	0.980572	-4.03872
ENSMUSG00000027330	Cdc25b	2	131028869	131040417	+	11549	0.300547	4.60887	2.06973	0.0649056	0.980572	-4.08116
ENSMUSG00000020484	Xbp1	11	5470659	5475893	+	5235	-0.219053	6.97856	-2.06888	0.064999	0.980572	-4.05441
ENSMUSG00000073073		11	30217464	30230491	+	13028	0.315048	3.14889	2.06863	0.0650267	0.980572	-4.20822
ENSMUSG00000055078		7	57057420	57159807	-	102388	0.2327	5.7479	2.0653	0.0653923	0.980572	-4.03989
ENSMUSG00000102753		3	72949308	72951172	-	1865	-0.49018	0.44659	-2.06525	0.0653977	0.980572	-4.41951
ENSMUSG00000029027	Dffb	4	154048906	154059583	-	10678	0.215137	3.78304	2.06362	0.0655773	0.980572	-4.15281
ENSMUSG00000058740	Kcnt1	2	25753746	25808285	+	54540	0.203703	8.29988	2.06336	0.065606	0.980572	-4.08947
ENSMUSG00000030341	Tnfrsf1a	6	125326325	125339447	+	13123	-0.286531	3.14287	-2.06315	0.0656289	0.980572	-4.20821
ENSMUSG00000119229	Mir3070a	12	109554377	109554465	+	89	0.888736	-1.61001	2.06067	0.0659033	0.980572	-4.50384
ENSMUSG00000042532	Golga7b	19	42236013	42258787	+	22775	-0.195258	4.94838	-2.05881	0.0661103	0.980572	-4.06376
ENSMUSG00000025981	Coq10b	1	55091929	55111861	+	19933	-0.304487	5.07396	-2.05668	0.0663481	0.980572	-4.057
ENSMUSG00000064368	mt-Nd6	MT	13552	14070	-	519	-0.617392	5.45631	-2.05319	0.0667379	0.980572	-4.05875
ENSMUSG00000031760	Mt3	8	94879235	94880774	+	1540	-0.346258	7.26167	-2.05232	0.066836	0.980572	-4.07189
ENSMUSG00000070498	Tmem132b	5	125608838	125869647	+	260810	0.220014	7.35232	2.05223	0.0668465	0.980572	-4.07548
ENSMUSG00000101054	Gm18406	1	112331917	112332585	-	669	0.510132	1.7954	2.05105	0.066979	0.980572	-4.3335
ENSMUSG00000029878	Dbpht2	12	74343442	74348782	+	5341	-0.256328	6.73742	-2.04607	0.0675418	0.980572	-4.06237
ENSMUSG00000006360	Crip1	12	113109936	113117499	+	7564	-0.493987	1.72968	-2.04534	0.067625	0.980572	-4.34212
ENSMUSG00000072769	Gm10419	5	108515635	108526105	+	10471	0.15468	7.16224	2.04504	0.0676588	0.980572	-4.07475
ENSMUSG00000087692		11	99278166	99278723	+	558	1.19064	-1.64149	2.0445	0.0677208	0.980572	-4.5031
ENSMUSG00000032469	Dbr1	9	99457852	99466554	+	8703	-0.215637	3.96549	-2.04308	0.0678831	0.980572	-4.1419
ENSMUSG00000031711	Zfp330	8	83490236	83500789	-	10554	-0.166807	4.72394	-2.04273	0.0679223	0.980572	-4.08389
ENSMUSG00000029135	Fosl2	5	32293145	32315186	+	22042	-0.451485	6.29381	-2.04228	0.0679736	0.980572	-4.0574
ENSMUSG00000082286	Pisd-ps1	11	3075904	3081004	+	5101	0.270869	4.44874	2.04104	0.0681152	0.980572	-4.10131
ENSMUSG00000050423	Ppp1r3g	13	36142822	36154371	+	11550	-0.48526	2.94106	-2.03824	0.0684365	0.980572	-4.23955
ENSMUSG00000036964	Trim17	11	58845511	58863924	+	18414	0.201443	4.12991	2.03689	0.0685922	0.980572	-4.13243
ENSMUSG00000050721	Plekho2	9	65459980	65487322	-	27343	-0.263306	3.80339	-2.03651	0.068636	0.980572	-4.1568
ENSMUSG00000031812	Map1lc3b	8	122317100	122325499	+	8400	-0.175552	7.24114	-2.03315	0.069025	0.980572	-4.0846
ENSMUSG00000073676	Hspe1	1	55127291	55130466	+	3176	-0.296438	5.78504	-2.03311	0.0690286	0.980572	-4.06202
ENSMUSG00000020571	Pdia6	12	17316546	17334771	+	18226	-0.194033	7.26959	-2.03267	0.0690803	0.980572	-4.08547
ENSMUSG00000026273	Mterf4	1	93226933	93233637	-	6705	-0.205548	3.99873	-2.0326	0.0690887	0.980572	-4.14696
ENSMUSG00000097592	4930500F10Rik	9	106125159	106126612	+	1454	0.446376	0.300214	2.03146	0.0692202	0.980572	-4.4363
ENSMUSG00000021990	Spata13	14	60871450	61002005	+	130556	0.239786	6.67992	2.02612	0.0698432	0.980572	-4.07324
ENSMUSG00000021115	Vrk1	12	105976487	106043685	+	67199	0.200902	6.10285	2.0234	0.0701627	0.980572	-4.06627
ENSMUSG00000035713	Usp35	7	96958587	96981227	-	22641	0.175223	4.83317	2.02332	0.0701721	0.980572	-4.08935
ENSMUSG00000051346	Spryd4	10	128045777	128047676	-	1900	-0.295439	2.72278	-2.02217	0.0703085	0.980572	-4.26494
ENSMUSG00000030706	Mrpl48	7	100194958	100257508	-	62551	-0.176878	5.70534	-2.0221	0.0703166	0.980572	-4.06935
ENSMUSG00000031838	Ifi30	8	71215419	71219307	-	3889	-0.395709	1.80659	-2.02202	0.0703256	0.980572	-4.34476
ENSMUSG00000032892	Rangrf	11	68863310	68866011	-	2702	-0.33562	2.07797	-2.01899	0.0706843	0.980572	-4.32232
ENSMUSG00000004151	Etv1	12	38829379	38920483	+	91105	0.288173	6.06018	2.01603	0.0710363	0.980572	-4.07223
ENSMUSG00000047904	Sstr2	11	113510168	113516854	+	6687	-0.450849	2.91672	-2.01597	0.0710429	0.980572	-4.25577
ENSMUSG00000073415	Gm10501	17	35195875	35200764	-	4890	0.217469	3.81733	2.0111	0.0716249	0.980572	-4.17287
ENSMUSG00000001964	Emd	X	73298293	73305154	+	6862	-0.205629	5.17911	-2.01043	0.0717052	0.980572	-4.08693
ENSMUSG00000046607	Hrk	5	118302713	118327543	+	24831	0.216954	5.87712	2.00998	0.0717598	0.980572	-4.07646
ENSMUSG00000070637	Srarp	4	141159983	141163416	-	3434	-0.568915	1.26018	-2.00889	0.071891	0.980572	-4.3818
ENSMUSG00000006494	Pdk1	2	71703568	71734202	+	30635	0.145589	5.33952	2.00815	0.0719795	0.980572	-4.0831
ENSMUSG00000046982	Tshz1	18	84029752	84105831	-	76080	-0.209601	6.36854	-2.00804	0.0719933	0.980572	-4.07977
ENSMUSG00000116506	5730414N17Rik	15	98770525	98771963	+	1439	-0.600849	-0.0433765	-2.00769	0.0720353	0.980572	-4.45532
ENSMUSG00000029394	Cdk2ap1	5	124483480	124501145	-	17666	-0.144471	4.67106	-2.00558	0.072291	0.980572	-4.1122
ENSMUSG00000032198	Dock6	9	21711156	21763931	-	52776	0.22826	4.91431	2.00124	0.0728177	0.980572	-4.10021
ENSMUSG00000020674	Pxdn	12	29987607	30067657	+	80051	0.253134	6.42011	1.99936	0.0730467	0.980572	-4.08513
ENSMUSG00000038481	Cdk19	10	40215560	40359814	+	144255	0.171436	6.8118	1.9973	0.0732997	0.980572	-4.09688
ENSMUSG00000040128	Pnrc1	4	33245423	33290163	-	44741	-0.229259	5.14494	-1.99301	0.0738273	0.980572	-4.09885
ENSMUSG00000031937	Vstm5	9	15150341	15170712	+	20372	0.210208	5.3566	1.99181	0.0739761	0.980572	-4.09344
ENSMUSG00000116494	Gm49449	15	98840431	98841546	+	1116	-0.510076	0.518275	-1.99119	0.074053	0.980572	-4.43252
ENSMUSG00000034936	Arl4d	11	101556367	101558658	+	2292	-0.323304	5.21763	-1.99026	0.0741674	0.980572	-4.10136
ENSMUSG00000029192	Tbc1d14	5	36647948	36750620	-	102673	0.170585	6.80086	1.99019	0.0741765	0.980572	-4.10056
ENSMUSG00000020032	Nuak1	10	84206769	84276461	-	69693	0.175606	5.58276	1.99007	0.074191	0.980572	-4.09217
ENSMUSG00000034145	Tmem63c	12	87068114	87136817	+	68704	0.310129	5.88734	1.98959	0.0742512	0.980572	-4.08992
ENSMUSG00000025036	Sfxn2	19	46561804	46586505	+	24702	0.203068	4.34957	1.98943	0.0742702	0.980572	-4.14106
ENSMUSG00000018999	Slc35b4	6	34130315	34154046	-	23732	0.152105	6.62787	1.98749	0.0745117	0.980572	-4.09804
ENSMUSG00000035621	Midn	10	79984106	79994202	+	10097	-0.216778	5.61903	-1.98221	0.0751731	0.980572	-4.09735
ENSMUSG00000021037	Ahsa1	12	87313253	87320772	+	7520	-0.18085	6.57552	-1.9811	0.0753124	0.980572	-4.10128
ENSMUSG00000036959	Bcorl1	X	47430235	47496926	+	66692	0.171253	5.14282	1.98082	0.0753468	0.980572	-4.10564
ENSMUSG00000034445	Cyb561a3	19	10554536	10573325	+	18790	0.182823	3.98973	1.98039	0.0754017	0.980572	-4.17515
ENSMUSG00000048234	Rnf149	1	39590377	39616486	-	26110	0.200443	5.24495	1.97692	0.0758393	0.980572	-4.10556
ENSMUSG00000090553	Snrpe	1	133531609	133538029	-	6421	-0.318792	4.35832	-1.97596	0.0759611	0.980572	-4.14964
ENSMUSG00000005483	Dnajb1	8	84334822	84339282	+	4461	-0.269351	6.21648	-1.97484	0.0761038	0.980572	-4.10114
ENSMUSG00000094840	Muc3a	5	137243270	137246852	-	3583	0.258105	4.27722	1.96785	0.0769966	0.980572	-4.1629
ENSMUSG00000039546	Ajap1	4	153457678	153567268	-	109591	0.156152	6.1375	1.96512	0.0773484	0.980572	-4.1061
ENSMUSG00000083669		7	29664643	29664990	-	348	-0.775285	-0.767241	-1.96213	0.0777349	0.980572	-4.49079
ENSMUSG00000025505	Tmem80	7	140907652	140917069	+	9418	0.156943	4.96189	1.95987	0.0780282	0.980572	-4.12446
ENSMUSG00000060244	Alyref2	1	171331046	171332318	+	1273	-0.36414	1.48103	-1.9585	0.0782062	0.980572	-4.38228
ENSMUSG00000020315	Sptbn1	11	30049395	30218175	-	168781	0.280169	10.1002	1.95771	0.0783098	0.980572	-4.18813
ENSMUSG00000012126	Ubxn11	4	133829881	133854904	+	25024	0.247106	4.50957	1.95621	0.0785058	0.980572	-4.15427
ENSMUSG00000015745	Plekho1	3	95895741	95903313	-	7573	-0.237833	3.97532	-1.95396	0.0788	0.980572	-4.19062
ENSMUSG00000104507	A430027H14Rik	1	189075628	189077094	+	1467	-0.514471	1.40269	-1.95241	0.0790044	0.980572	-4.38807
ENSMUSG00000004460	Dnajb11	16	22676595	22698384	+	21790	-0.223459	5.96843	-1.95205	0.0790516	0.980572	-4.11508
ENSMUSG00000044452	Zfp507	7	35471768	35502428	-	30661	0.271053	5.25818	1.95069	0.0792306	0.980572	-4.12279
ENSMUSG00000071647	Eml3	19	8906916	8918946	+	12031	0.19415	3.25365	1.94971	0.0793603	0.980572	-4.25211
ENSMUSG00000028464	Tpm2	4	43514711	43523765	-	9055	-0.499302	2.02857	-1.94861	0.079506	0.980572	-4.3476
ENSMUSG00000081344	Gm14303	2	172351441	172351611	-	171	0.615849	1.2307	1.94828	0.0795499	0.980572	-4.41087
ENSMUSG00000028641	P3h1	4	119090112	119106172	+	16061	0.159402	4.16433	1.94767	0.0796304	0.980572	-4.18114
ENSMUSG00000027952	Pmvk	3	89361848	89376320	+	14473	-0.205211	5.02081	-1.938	0.0809214	0.980572	-4.13872
ENSMUSG00000030357	Fkbp4	6	128406698	128415640	-	8943	-0.171711	7.05615	-1.93767	0.0809659	0.980572	-4.14042
ENSMUSG00000016179	Camk1g	1	193028654	193052606	-	23953	0.202499	6.84589	1.93765	0.0809696	0.980572	-4.13488
ENSMUSG00000037820	Tgm2	2	157958322	157988356	-	30035	-0.340948	4.35668	-1.93649	0.0811257	0.980572	-4.16734
ENSMUSG00000025188	Hps1	19	42743544	42768417	-	24874	0.228845	4.80356	1.93513	0.0813091	0.980572	-4.1473
ENSMUSG00000110279	Gm45552	7	44771341	44773568	+	2228	0.323189	1.63791	1.93248	0.081668	0.980572	-4.37572
ENSMUSG00000091890	A830073O21Rik	7	73387677	73390772	-	3096	0.439332	3.54142	1.93123	0.0818379	0.980572	-4.23322
ENSMUSG00000014763	Fam120b	17	15616464	15653845	+	37382	0.19185	7.2135	1.9307	0.0819105	0.980572	-4.14906
ENSMUSG00000037685	Atp8a1	5	67775483	68004777	-	229295	0.253605	8.52251	1.93028	0.0819666	0.980572	-4.17335
ENSMUSG00000069917	Hba-a2	11	32246489	32247298	+	810	-0.91033	3.34569	-1.92835	0.0822298	0.980572	-4.25383
ENSMUSG00000113102		12	98798072	98799044	+	973	-0.780787	-1.32211	-1.92805	0.0822714	0.980572	-4.50894
ENSMUSG00000034765	Dusp5	19	53517540	53530862	+	13323	-0.396106	3.46339	-1.92773	0.0823146	0.980572	-4.2473
ENSMUSG00000044786	Zfp36	7	28076209	28079678	-	3470	-0.358451	2.42207	-1.92665	0.0824624	0.980572	-4.32216
ENSMUSG00000042810	Krba1	6	48372520	48396715	+	24196	0.189633	6.61333	1.926	0.0825517	0.980572	-4.13804
ENSMUSG00000025980	Hspd1	1	55116994	55127402	-	10409	-0.170263	7.41402	-1.92513	0.082671	0.980572	-4.15644
ENSMUSG00000018965	Ywhah	5	33176160	33185310	+	9151	-0.196633	8.17596	-1.9239	0.0828408	0.980572	-4.17081
ENSMUSG00000024339	Tap2	17	34422501	34435295	+	12795	-0.249555	3.09072	-1.92079	0.0832692	0.980572	-4.27445
ENSMUSG00000032298	Neil1	9	57050084	57055589	-	5506	0.21199	3.61626	1.91902	0.083514	0.980572	-4.23804
ENSMUSG00000006519	Cyba	8	123151515	123159669	-	8155	-0.325307	2.15452	-1.91895	0.083524	0.980572	-4.34848
ENSMUSG00000083563	Gm13340	2	22478115	22479659	-	1545	0.329374	0.864197	1.91708	0.083784	0.980572	-4.4267
ENSMUSG00000028670	Lypla2	4	135695535	135699937	-	4403	-0.202689	5.86279	-1.9153	0.0840311	0.980572	-4.14027
ENSMUSG00000003068	Stk11	10	79951637	79966516	+	14880	-0.145136	6.09257	-1.91439	0.0841581	0.980572	-4.1407
ENSMUSG00000025147		7	141562272	141614802	-	52531	-0.133975	4.89261	-1.91395	0.0842201	0.980572	-4.15659
ENSMUSG00000056228	Cars2	8	11563977	11600783	-	36807	0.154986	4.85622	1.91235	0.0844437	0.980572	-4.15831
ENSMUSG00000020173		11	12186608	12414960	-	228353	0.252207	6.88454	1.91114	0.0846138	0.980572	-4.15296
ENSMUSG00000097649	Gm10561	1	55265410	55274781	+	9372	-0.315448	3.11587	-1.91034	0.0847253	0.980572	-4.28177
ENSMUSG00000023795	Pisd-ps2	17	3126853	3134458	-	7606	0.463344	3.28079	1.91028	0.0847342	0.980572	-4.26488
ENSMUSG00000033295	Ptprf	4	118065410	118148602	-	83193	0.286931	7.14312	1.90884	0.084936	0.980572	-4.16105
ENSMUSG00000069919	Hba-a1	11	32233511	32234465	+	955	-0.8809	3.86539	-1.90839	0.0849998	0.980572	-4.22577
ENSMUSG00000040022	Rab11fip2	19	59891316	59932086	-	40771	0.169827	6.30411	1.90731	0.0851521	0.980572	-4.14623
ENSMUSG00000046719	Nxph3	11	95400671	95405396	-	4726	-1.08579	1.34527	-1.9073	0.0851533	0.980572	-4.40363
ENSMUSG00000040860	Crocc	4	140743948	140787861	-	43914	0.214705	7.96883	1.90428	0.0855803	0.980572	-4.17841
ENSMUSG00000036432	Siah2	3	58582359	58599821	-	17463	-0.188587	4.16946	-1.90334	0.0857136	0.980572	-4.20317
ENSMUSG00000047502		4	106537614	106588122	-	50509	0.259292	5.0072	1.9019	0.0859184	0.980572	-4.16159
ENSMUSG00000086844	B230206H07Rik	7	140939054	140945023	-	5970	0.442336	2.00022	1.9016	0.0859609	0.980572	-4.3611
ENSMUSG00000036752	Tubb4b	2	25112172	25114714	-	2543	-0.188435	6.60378	-1.90095	0.086054	0.980572	-4.15494
ENSMUSG00000050967	Creg2	1	39657574	39690642	-	33069	0.155568	6.60923	1.90014	0.0861692	0.980572	-4.15498
ENSMUSG00000097412	1810014B01Rik	10	86521389	86530670	+	9282	-0.282253	2.38513	-1.89992	0.0862009	0.980572	-4.33439
ENSMUSG00000072214	Septin5	16	18439252	18448704	-	9453	0.397284	3.95937	1.89988	0.0862069	0.980572	-4.21761
ENSMUSG00000026544	Dusp23	1	172458331	172460529	-	2199	-0.486796	1.18554	-1.89819	0.0864476	0.980572	-4.41328
ENSMUSG00000035048	Anapc13	9	102503495	102511624	+	8130	-0.295487	4.04365	-1.89416	0.0870275	0.980572	-4.21908
ENSMUSG00000038845	Phb	11	95557783	95571599	+	13817	-0.173868	5.80954	-1.89228	0.087298	0.980572	-4.15593
ENSMUSG00000084846		3	94901721	94904661	-	2941	-0.34459	0.894625	-1.89208	0.0873267	0.980572	-4.43166
ENSMUSG00000059939	9430015G10Rik	4	156194439	156211722	+	17284	0.199048	5.41702	1.88868	0.0878201	0.980572	-4.16127
ENSMUSG00000024177	Nme4	17	26310708	26314576	-	3869	0.346014	1.15762	1.88861	0.0878295	0.980572	-4.42133
ENSMUSG00000020175	Rab36	10	74872890	74890580	+	17691	0.204924	6.27403	1.88831	0.0878739	0.980572	-4.15826
ENSMUSG00000038279	Nop2	6	125108872	125121716	+	12845	-0.139598	4.90508	-1.8842	0.088473	0.980572	-4.17568
ENSMUSG00000036632	Alg5	3	54642960	54658739	+	15780	0.160004	4.27226	1.88404	0.0884964	0.980572	-4.20797
ENSMUSG00000046380	Jrk	15	74574150	74581384	-	7235	0.270676	3.25562	1.88228	0.0887533	0.980572	-4.27914
ENSMUSG00000002289		17	33992724	34000804	-	8081	-0.409531	1.92471	-1.88197	0.0887988	0.980572	-4.37439
ENSMUSG00000052305	Hbb-bs	7	103475741	103477303	-	1563	-0.875659	4.81259	-1.88151	0.0888664	0.980572	-4.18672
ENSMUSG00000033458	Fan1	7	63996506	64023843	-	27338	0.312434	4.036	1.88043	0.0890254	0.980572	-4.22445
ENSMUSG00000028832	Stmn1	4	134195631	134201154	+	5524	-0.293148	6.30247	-1.87829	0.0893401	0.980572	-4.1668
ENSMUSG00000027272	Ubr1	2	120690750	120801196	-	110447	0.227687	6.56338	1.87692	0.0895429	0.980572	-4.17039
ENSMUSG00000021621	Zcchc9	13	91944652	91955824	-	11173	-0.154058	4.26816	-1.87498	0.0898295	0.980572	-4.21201
ENSMUSG00000021127	Zfp36l1	12	80154528	80159787	-	5260	-0.144928	4.50285	-1.87371	0.0900189	0.980572	-4.20032
ENSMUSG00000044934		13	64280832	64301016	-	20185	-0.320928	3.396	-1.8703	0.0905266	0.980572	-4.27307
ENSMUSG00000009687	Fxyd5	7	30732147	30741906	-	9760	-0.223021	3.22478	-1.86729	0.0909776	0.980572	-4.2908
ENSMUSG00000067150	Xpo5	17	46513708	46554524	+	40817	0.181555	6.49106	1.86566	0.0912227	0.980572	-4.17607
ENSMUSG00000064246	Chil1	1	134109914	134117919	+	8006	-0.267819	2.86757	-1.86565	0.0912232	0.980572	-4.31309
ENSMUSG00000022587	Ly6e	15	74826900	74831754	+	4855	-0.18463	6.06229	-1.86432	0.0914239	0.980572	-4.17417
ENSMUSG00000037573	Tob1	11	94102280	94106321	+	4042	-0.187561	5.34044	-1.86414	0.0914507	0.980572	-4.17917
ENSMUSG00000113198		12	110282424	110282798	+	375	1.02435	-1.9528	1.86283	0.0916492	0.980572	-4.52614
ENSMUSG00000004788	Eif2b2	12	85266255	85273402	+	7148	-0.18768	4.89996	-1.85933	0.0921793	0.980572	-4.19244
ENSMUSG00000116478		15	99781521	99782325	+	805	-0.668363	-1.52936	-1.85783	0.0924068	0.980572	-4.51876
ENSMUSG00000006057	Atp5g1	11	95959678	95966496	-	6819	-0.20744	6.39493	-1.85763	0.0924374	0.980572	-4.18057
ENSMUSG00000034156	Tspoap1	11	87651367	87676754	+	25388	0.175471	8.85901	1.85763	0.0924376	0.980572	-4.22021
ENSMUSG00000038630	Zkscan16	4	58943628	58958355	+	14728	0.688834	5.95508	1.85637	0.0926305	0.980572	-4.18044
ENSMUSG00000020899	Pfas	11	68876523	68899286	-	22764	0.254645	5.35498	1.85408	0.0929802	0.980572	-4.18507
ENSMUSG00000044716	Dok7	5	35214110	35245183	+	31074	0.229681	4.77271	1.85402	0.0929887	0.980572	-4.19803
ENSMUSG00000027404	Snrpb	2	130013555	130021323	-	7769	-0.193596	5.75642	-1.85398	0.0929946	0.980572	-4.18181
ENSMUSG00000038759	Nup205	6	35154356	35224531	+	70176	0.218577	6.14132	1.85232	0.0932501	0.980572	-4.18165
ENSMUSG00000030123	Plxnd1	6	115931772	115971966	-	40195	0.278177	6.60791	1.84809	0.0939009	0.980572	-4.18937
ENSMUSG00000046402	Rbp1	9	98305014	98328628	+	23615	-0.540121	4.59877	-1.84777	0.0939509	0.980572	-4.2172
ENSMUSG00000056258	Kcnq3	15	65858236	66158491	-	300256	0.294293	7.93001	1.84745	0.0940004	0.980572	-4.21362
ENSMUSG00000032827	Ppp1r9a	6	4902917	5165661	+	262745	0.21	9.3543	1.84722	0.0940363	0.980572	-4.23441
ENSMUSG00000032523	Hhatl	9	121613082	121621573	-	8492	-0.292644	2.50872	-1.84663	0.0941276	0.980572	-4.34564
ENSMUSG00000019996	Map7	10	20024217	20157336	+	133120	0.275192	7.92938	1.84638	0.0941659	0.980572	-4.21395
ENSMUSG00000021209	Ppp4r4	12	103498542	103580090	+	81549	0.171934	6.63118	1.84629	0.0941805	0.980572	-4.19088
ENSMUSG00000020397	Med7	11	46327752	46333548	+	5797	-0.288456	4.17494	-1.84484	0.0944045	0.980572	-4.23352
ENSMUSG00000022055	Nefl	14	68321312	68326544	+	5233	-0.292581	7.84354	-1.84465	0.0944342	0.980572	-4.21418
ENSMUSG00000032579	Hemk1	9	107204283	107215549	-	11267	0.155237	5.24263	1.8408	0.0950336	0.980572	-4.19532
ENSMUSG00000044296		11	50722858	50732379	-	9522	0.243364	2.29708	1.83887	0.0953354	0.980572	-4.3613
ENSMUSG00000034799	Unc13a	8	72077061	72124401	-	47341	0.255067	8.64746	1.83856	0.0953849	0.980572	-4.22782
ENSMUSG00000032571	Pik3r4	9	105520177	105564856	+	44680	0.156732	6.13914	1.83708	0.0956168	0.980572	-4.19185
ENSMUSG00000038975	Rabggtb	3	153612924	153618646	-	5723	-0.186429	5.50233	-1.83335	0.0962042	0.980572	-4.19741
ENSMUSG00000070871	Ccnyl1	1	64729614	64764803	+	35190	0.178754	5.67382	1.83236	0.0963612	0.980572	-4.19614
ENSMUSG00000024871	Doc2g	19	4053313	4057005	+	3693	-0.399869	1.46066	-1.83186	0.0964399	0.980572	-4.41321
ENSMUSG00000009092	Derl3	10	75729247	75731775	+	2529	-0.412025	1.74382	-1.83086	0.0965981	0.980572	-4.39786
ENSMUSG00000086859	Snhg20	11	116966834	116969781	+	2948	-0.279838	3.80846	-1.82932	0.0968428	0.980572	-4.26926
ENSMUSG00000085156	Snhg15	11	6475591	6478779	-	3189	-0.34613	1.54904	-1.82765	0.0971089	0.980572	-4.40877
ENSMUSG00000031762	Mt2	8	94899292	94900196	+	905	-0.307033	6.21678	-1.82644	0.0973018	0.980572	-4.20057
ENSMUSG00000053334	Ficd	5	113873864	113878661	+	4798	-0.1526	4.03681	-1.82563	0.097431	0.980572	-4.25341
ENSMUSG00000039714	Cplx3	9	57507275	57513564	-	6290	-1.53122	0.201307	-1.82401	0.0976906	0.980572	-4.47509
ENSMUSG00000060143	Gm10076	14	105919262	105919645	+	384	-0.483912	0.828316	-1.82112	0.0981559	0.980572	-4.45094
ENSMUSG00000030534	Vps33b	7	79919397	79941502	+	22106	0.179666	4.68678	1.82111	0.0981566	0.980572	-4.22208
ENSMUSG00000035954		12	40495951	40896873	+	400923	0.28794	7.83547	1.82103	0.0981695	0.980572	-4.22787
ENSMUSG00000040795	Iqcc	4	129508919	129512892	-	3974	0.189457	4.05595	1.81836	0.0986008	0.980572	-4.25836
ENSMUSG00000085278	Gm12841	4	117740818	117743192	+	2375	0.32381	1.28043	1.818	0.0986588	0.980572	-4.43069
ENSMUSG00000050854	Tmem125	4	118398138	118401241	-	3104	0.34449	2.53572	1.81788	0.0986773	0.980572	-4.35432
ENSMUSG00000010376	Nedd8	14	55899720	55909581	-	9862	-0.230681	5.87031	-1.81743	0.0987502	0.980572	-4.20572
ENSMUSG00000026880	Stom	2	35203998	35226988	-	22991	-0.202496	3.55815	-1.81635	0.0989265	0.980572	-4.28981
ENSMUSG00000107194	Gm43173	5	93240618	93241210	-	593	-1.00404	-1.9845	-1.81619	0.0989518	0.980572	-4.52968
ENSMUSG00000056679	Gpr173	X	151126594	151151700	-	25107	0.206493	4.4949	1.81576	0.0990219	0.980572	-4.23237
ENSMUSG00000018841	Rad51d	11	82767260	82781440	-	14181	0.14087	4.38469	1.81493	0.0991565	0.980572	-4.23896
ENSMUSG00000023067	Cdkn1a	17	29309950	29319701	+	9752	-0.29069	4.56548	-1.81184	0.0996593	0.980572	-4.23367
ENSMUSG00000025008	Tctn3	19	40584890	40600677	-	15788	0.151955	5.45189	1.81063	0.0998574	0.980572	-4.21239
ENSMUSG00000003762	Coq8b	7	26932448	26957375	+	24928	0.212677	4.26544	1.81044	0.0998878	0.980572	-4.2506
ENSMUSG00000025921	Rdh10	1	16175998	16203958	+	27961	-0.161927	4.76566	-1.8096	0.100026	0.980572	-4.22591
ENSMUSG00000078622	Ccdc47	11	106088234	106107170	-	18937	0.18931	5.75476	1.80946	0.100048	0.980572	-4.21096
ENSMUSG00000052397	Ezr	17	7005440	7050183	-	44744	-0.196621	5.97354	-1.80818	0.100258	0.980572	-4.21148
ENSMUSG00000048038	Ccdc187	2	26133481	26184569	-	51089	0.312406	7.1455	1.80613	0.100595	0.980572	-4.22639
ENSMUSG00000034525	Ice1	13	70699826	70785753	-	85928	0.252971	7.82101	1.80423	0.100909	0.980572	-4.23784
ENSMUSG00000017740	Slc12a5	2	164802722	164841651	+	38930	0.192673	9.47436	1.80401	0.100946	0.980572	-4.25987
ENSMUSG00000102059	Gm20257	1	58691800	58694990	+	3191	-0.300691	1.04496	-1.80297	0.101116	0.980572	-4.44422
ENSMUSG00000046844	Vat1l	8	114932352	115100811	+	168460	0.259762	8.07051	1.80271	0.101159	0.980572	-4.24158
ENSMUSG00000054034	Tceal5	X	135101697	135104625	-	2929	-0.278239	5.35727	-1.80153	0.101355	0.980572	-4.22085
ENSMUSG00000060671	Atp8b2	3	89846788	89870815	-	24028	0.201058	7.15626	1.79687	0.102131	0.980572	-4.23209
ENSMUSG00000021591	Glrx	13	75987987	75998273	+	10287	-0.2526	3.45367	-1.79683	0.102137	0.980572	-4.30151
ENSMUSG00000003031	Cdkn1b	6	134897364	134902476	+	5113	-0.182503	5.48759	-1.79618	0.102246	0.980572	-4.2215
ENSMUSG00000068114	Ccdc134	15	82012123	82026404	+	14282	-0.219859	4.50809	-1.79575	0.102318	0.980572	-4.24487
ENSMUSG00000024201	Kdm4b	17	56633062	56709870	+	76809	0.176779	6.94201	1.79369	0.102663	0.980572	-4.22986
ENSMUSG00000004565	Pnpla6	8	3565384	3594267	+	28884	0.177647	6.39275	1.79353	0.102689	0.980572	-4.2223
ENSMUSG00000031310	Zmym3	X	100447990	100464455	-	16466	0.200082	8.24512	1.79266	0.102836	0.980572	-4.24946
ENSMUSG00000110320		7	12594811	12602510	-	7700	0.341461	2.4647	1.79227	0.1029	0.980572	-4.36574
ENSMUSG00000039195	Bbln	2	32267109	32271950	-	4842	-0.221176	5.13011	-1.78819	0.103588	0.980572	-4.23242
ENSMUSG00000048616	Nog	11	89191464	89193158	-	1695	-0.350575	1.51037	-1.7873	0.103739	0.980572	-4.4237
ENSMUSG00000050105	Fam110d	4	133978421	133981417	-	2997	-0.804219	1.7093	-1.78491	0.104146	0.980572	-4.41061
ENSMUSG00000100252	Mir124-2hg	3	17844085	17863134	+	19050	-0.209792	5.71487	-1.78455	0.104207	0.980572	-4.22736
ENSMUSG00000027669	Gnb4	3	32634481	32670734	-	36254	0.163859	6.59036	1.7822	0.104606	0.980572	-4.232
ENSMUSG00000084915	C230037L18Rik	15	89360439	89369050	+	8612	0.247604	3.22177	1.78161	0.104708	0.980572	-4.32652
ENSMUSG00000030793	Pycard	7	127588880	127593039	-	4160	-0.33627	1.26658	-1.78093	0.104823	0.980572	-4.43587
ENSMUSG00000028047	Thbs3	3	89122487	89134144	+	11658	0.207857	5.21674	1.78045	0.104905	0.980572	-4.23558
ENSMUSG00000026283	Ing5	1	93731687	93749823	+	18137	0.16081	4.47019	1.77978	0.10502	0.980572	-4.25699
ENSMUSG00000024127	Prepl	17	85370898	85397669	-	26772	0.315511	8.52616	1.77949	0.10507	0.980572	-4.261
ENSMUSG00000026224	4933407L21Rik	1	85856204	85868346	+	12143	0.231628	4.06252	1.77652	0.10558	0.980572	-4.27874
ENSMUSG00000078161	Erich3	3	154369496	154473427	+	103932	0.169208	6.30315	1.77639	0.105603	0.980572	-4.23272
ENSMUSG00000033396	Spg11	2	121884001	121948867	-	64867	0.317625	5.44212	1.77617	0.10564	0.980572	-4.23502
ENSMUSG00000060152	Pop5	5	115373895	115383410	+	9516	-0.251623	5.21734	-1.77602	0.105666	0.980572	-4.23879
ENSMUSG00000031723	Txnl4b	8	110292524	110300683	+	8160	-0.215699	3.8887	-1.77597	0.105674	0.980572	-4.28946
ENSMUSG00000014856	Tmem208	8	106052986	106061851	+	8866	-0.145939	4.92655	-1.77471	0.105892	0.980572	-4.24501
ENSMUSG00000052031	Tagap1	17	7222410	7228555	-	6146	-0.161781	4.04473	-1.774	0.106014	0.980572	-4.28037
ENSMUSG00000037784	Dzip1l	9	99511549	99551309	+	39761	0.235232	6.04	1.77285	0.106214	0.980572	-4.23455
ENSMUSG00000103103	4833445I07Rik	9	108444732	108446373	+	1642	0.277548	1.38163	1.77124	0.106493	0.980572	-4.43394
ENSMUSG00000103280	Gm37277	1	4975974	4977084	-	1111	0.256075	1.182	1.76967	0.106765	0.980572	-4.44447
ENSMUSG00000002068	Ccne1	7	37797409	37806959	-	9551	-0.206653	3.09358	-1.7691	0.106863	0.980572	-4.33764
ENSMUSG00000003746		10	53780881	53952705	-	171825	0.239568	6.86751	1.76866	0.10694	0.980572	-4.24466
ENSMUSG00000102336	Gm37233	1	34466083	34472345	-	6263	0.658602	2.3851	1.76749	0.107144	0.980572	-4.37951
ENSMUSG00000041629	Fam104a	11	113552145	113574981	-	22837	-0.134888	4.95261	-1.76748	0.107146	0.980572	-4.24858
ENSMUSG00000054945	Gm9958	5	90514479	90516347	+	1869	-0.316171	0.955231	-1.76655	0.107308	0.980572	-4.45105
ENSMUSG00000029672	Fam3c	6	22306519	22356242	-	49724	-0.183785	5.36383	-1.7663	0.107352	0.980572	-4.24257
ENSMUSG00000028945	Rheb	5	25007821	25047622	-	39802	-0.161429	6.62965	-1.76614	0.10738	0.980572	-4.24325
ENSMUSG00000083391	Gm14148	2	151215928	151216967	+	1040	-0.353953	3.94782	-1.76598	0.107408	0.980572	-4.29579
ENSMUSG00000047259	Mc4r	18	66990775	66993577	-	2803	-0.502126	1.86496	-1.76576	0.107447	0.980572	-4.40807
ENSMUSG00000035051	Dhx57	17	80545738	80597905	-	52168	0.144857	6.40785	1.76402	0.107751	0.980572	-4.24165
ENSMUSG00000041895	Wipi1	11	109464157	109502793	-	38637	0.190694	4.6635	1.76361	0.107823	0.980572	-4.25787
ENSMUSG00000101578		13	22801626	22808421	-	6796	-0.546876	2.3972	-1.76193	0.108117	0.980572	-4.37254
ENSMUSG00000026484	Rnf2	1	151333755	151376706	-	42952	-0.179551	5.07861	-1.76165	0.108168	0.980572	-4.2488
ENSMUSG00000116081	Gm49593	15	79364428	79366875	-	2448	-0.349501	4.27395	-1.76116	0.108254	0.980572	-4.27479
ENSMUSG00000030321	Efcab12	6	115787690	115815373	-	27684	0.199074	4.28079	1.75715	0.108962	0.980572	-4.2785
ENSMUSG00000083700		5	93343657	93344038	+	382	-0.681369	-2.00664	-1.75662	0.109055	0.980572	-4.53509
ENSMUSG00000002233	Rhoc	3	104695691	104701775	+	6085	-0.223041	3.20228	-1.75609	0.109149	0.980572	-4.33846
ENSMUSG00000027291	Vps39	2	120146942	120183618	-	36677	0.141434	6.82539	1.7558	0.109201	0.980572	-4.25257
ENSMUSG00000026697		1	162466724	162477262	+	10539	-1.70924	0.711436	-1.75517	0.109313	0.980572	-4.45553
ENSMUSG00000037461	Ints7	1	191307748	191355800	+	48053	0.136685	6.42459	1.75483	0.109374	0.980572	-4.24789
ENSMUSG00000093507		3	96161935	96163593	-	1659	-0.360065	1.21539	-1.75476	0.109386	0.980572	-4.44747
ENSMUSG00000064339	mt-Rnr2	MT	1094	2675	+	1582	-0.358948	12.2823	-1.75419	0.109486	0.980572	-4.3229
ENSMUSG00000003135	Cnot11	1	39574073	39585970	+	11898	-0.156699	5.32313	-1.75405	0.109511	0.980572	-4.25085
ENSMUSG00000038374	Rbm8a	3	96537249	96541107	+	3859	-0.161124	5.32731	-1.75266	0.10976	0.980572	-4.25174
ENSMUSG00000021244	Ylpm1	12	85043095	85117289	+	74195	0.228543	7.57443	1.75007	0.110222	0.980572	-4.26733
ENSMUSG00000047044	D030056L22Rik	19	18690557	18695792	+	5236	-0.212801	4.54458	-1.74886	0.110439	0.980572	-4.2718
ENSMUSG00000028064	Sema4a	3	88343266	88368489	-	25224	0.156108	5.71808	1.7488	0.110449	0.980572	-4.2513
ENSMUSG00000109882	Gm18706	7	45741320	45742385	-	1066	-0.412843	-0.0482348	-1.74868	0.11047	0.980572	-4.49176
ENSMUSG00000039157	Fam102a	2	32425344	32459768	+	34425	0.135455	7.10504	1.74771	0.110646	0.980572	-4.26195
ENSMUSG00000018923	Med11	11	70342745	70344553	+	1809	-0.260486	2.56404	-1.74732	0.110714	0.980572	-4.37951
ENSMUSG00000020566		12	17334722	17379360	-	44639	0.434106	5.18333	1.74682	0.110805	0.980572	-4.25776
ENSMUSG00000003545	Fosb	7	19036621	19043976	-	7356	-0.335096	5.30967	-1.74681	0.110807	0.980572	-4.25699
ENSMUSG00000046879	Irgm1	11	48752795	48762510	-	9716	-0.204504	2.83806	-1.74656	0.110852	0.980572	-4.36149
ENSMUSG00000020312	Shc2	10	79453885	79473752	-	19868	0.168466	6.11366	1.74585	0.110979	0.980572	-4.25241
ENSMUSG00000035545	Leng8	7	4140038	4151176	+	11139	0.192682	8.40777	1.74584	0.110982	0.980572	-4.27861
ENSMUSG00000014786	Slc9a5	8	106075475	106096513	+	21039	0.149898	6.3222	1.74146	0.111773	0.980572	-4.25592
ENSMUSG00000034684	Sema3f	9	107558699	107587674	-	28976	0.229844	5.02254	1.74102	0.111852	0.980572	-4.26376
ENSMUSG00000062861	Zfp28	7	6386294	6399914	+	13621	0.210796	4.01965	1.7406	0.111929	0.980572	-4.2998
ENSMUSG00000067786	Nnat	2	157401998	157404442	+	2445	-0.263477	8.23625	-1.74039	0.111966	0.980572	-4.27972
ENSMUSG00000050856	Atp5k	5	108581110	108582314	-	1205	-0.354993	5.829	-1.73901	0.112218	0.980572	-4.25833
ENSMUSG00000031074	Fgf3	7	144391820	144398173	+	6354	0.463053	3.1179	1.73678	0.112623	0.980572	-4.35575
ENSMUSG00000020474	Polm	11	5777860	5788016	-	10157	0.168278	3.82056	1.73572	0.112818	0.980572	-4.31445
ENSMUSG00000025280	Polr3a	14	24498764	24537126	-	38363	0.179666	5.56196	1.73538	0.112879	0.980572	-4.2608
ENSMUSG00000032532	Cck	9	121318890	121324760	-	5871	-0.859308	2.68925	-1.7353	0.112895	0.980572	-4.37795
ENSMUSG00000029576	Radil	5	142470594	142536853	-	66260	0.223343	5.58658	1.73432	0.113073	0.980572	-4.26147
ENSMUSG00000024170	Telo2	17	25318544	25334941	-	16398	0.148066	4.70003	1.73361	0.113204	0.980572	-4.2764
ENSMUSG00000032252	Glce	9	61964530	62029937	-	65408	0.145851	6.43397	1.73311	0.113295	0.980572	-4.26241
ENSMUSG00000038766	Gabpb2	3	95089077	95125227	-	36151	0.238969	5.56975	1.73267	0.113376	0.980572	-4.26239
ENSMUSG00000038128	Camk4	18	33067984	33324281	+	256298	0.289917	7.78554	1.72927	0.114003	0.980572	-4.28255
ENSMUSG00000032373	Car12	9	66620968	66674127	+	53160	0.299036	6.6472	1.72775	0.114282	0.980572	-4.2678
ENSMUSG00000042682	Selenok	14	29690265	29697619	+	7355	-0.237303	6.22308	-1.72702	0.114417	0.980572	-4.26538
ENSMUSG00000060012	Kif13b	14	64884714	65047066	+	162353	0.296213	6.35641	1.72604	0.1146	0.980572	-4.26672
ENSMUSG00000026238	Ptma	1	86454448	86458434	+	3987	-0.216882	6.76848	-1.72468	0.114852	0.980572	-4.27139
ENSMUSG00000024732	Ccdc86	19	10918845	10926630	-	7786	-0.214956	3.03326	-1.72126	0.115488	0.980572	-4.36339
ENSMUSG00000086098	Gm14291	2	167043496	167044719	+	1224	0.437369	-0.0225837	1.72042	0.115646	0.980572	-4.49847
ENSMUSG00000046111	Cep295	9	15228211	15269084	-	40874	0.218041	5.54294	1.7198	0.115762	0.980572	-4.27098
ENSMUSG00000027312	Atrn	2	130748415	130872253	+	123839	0.200445	8.05471	1.71972	0.115777	0.980572	-4.29068
ENSMUSG00000036873	2410004B18Rik	3	145643769	145650584	+	6816	-0.18103	4.55744	-1.71937	0.115843	0.980572	-4.289
ENSMUSG00000030772	Dkk3	7	111715224	111758264	-	43041	-0.263211	6.55517	-1.71758	0.116178	0.980572	-4.27391
ENSMUSG00000036398	Ppp1r11	17	37259248	37262633	-	3386	-0.211673	5.62288	-1.71714	0.11626	0.980572	-4.27288
ENSMUSG00000020900	Myh10	11	68582385	68707458	+	125074	0.171963	8.74535	1.71645	0.116389	0.980572	-4.29932
ENSMUSG00000031665	Sall1	8	89753863	89770790	-	16928	0.198307	4.93815	1.71495	0.116673	0.980572	-4.28088
ENSMUSG00000052214	Opa3	7	18962259	18990468	+	28210	-0.146675	6.01508	-1.71476	0.116708	0.980572	-4.27287
ENSMUSG00000066456	Hmgn3	9	82992001	83028738	-	36738	-0.2237	5.24613	-1.7145	0.116758	0.980572	-4.27748
ENSMUSG00000033790	Tubgcp5	7	55443902	55481425	+	37524	0.143758	5.73543	1.71448	0.116761	0.980572	-4.2735
ENSMUSG00000035770	Dync1li2	8	105144312	105169679	-	25368	0.143204	8.38206	1.71398	0.116855	0.980572	-4.29702
ENSMUSG00000108350	Gm44950	7	79572320	79574615	-	2296	-0.248033	3.36511	-1.71394	0.116864	0.980572	-4.34854
ENSMUSG00000068263	Efcc1	6	87707851	87732890	+	25040	0.214808	3.71564	1.71386	0.116877	0.980572	-4.33103
ENSMUSG00000061360	Phf5a	15	81748721	81756112	-	7392	-0.171331	4.74701	-1.71204	0.117221	0.980572	-4.28771
ENSMUSG00000069631	Strada	11	106054156	106092994	-	38839	0.168728	5.75605	1.71067	0.117481	0.980572	-4.27598
ENSMUSG00000028035	Dnajb4	3	151884148	151915939	-	31792	-0.169377	6.92262	-1.70971	0.117664	0.980572	-4.2835
ENSMUSG00000022956	Atp5o	16	91722102	91728575	-	6474	-0.210661	4.57317	-1.70933	0.117735	0.980572	-4.2962
ENSMUSG00000047013	Fbxo41	6	85446556	85479976	-	33421	0.182445	7.07639	1.70892	0.117813	0.980572	-4.2857
ENSMUSG00000039810	Zc3h10	10	128377832	128383643	-	5812	-0.184745	3.76411	-1.70869	0.117858	0.980572	-4.33002
ENSMUSG00000006205	Htra1	7	130537841	130587390	+	49550	-0.157279	7.3695	-1.70847	0.117899	0.980572	-4.28958
ENSMUSG00000022428	Cby1	15	79543400	79551861	+	8462	-0.202868	4.7724	-1.7084	0.117912	0.980572	-4.29014
ENSMUSG00000086429	Gt(ROSA)26Sor	6	113044389	113054294	-	9906	-0.31187	4.43125	-1.70715	0.118151	0.980572	-4.29815
ENSMUSG00000021485		13	55472981	55477636	-	4656	-0.482137	1.41617	-1.70597	0.118376	0.980572	-4.45068
ENSMUSG00000068373	D430041D05Rik	2	103973418	104241358	-	267941	0.262148	7.36146	1.70535	0.118494	0.980572	-4.29124
ENSMUSG00000087059		11	75685594	75716067	+	30474	0.483381	4.06767	1.70525	0.118514	0.980572	-4.31635
ENSMUSG00000032342	Mto1	9	78355490	78382630	+	27141	0.134121	4.85809	1.70406	0.118741	0.980572	-4.28943
ENSMUSG00000033253	Szt2	4	118219940	118266470	-	46531	0.27551	6.60829	1.70306	0.118932	0.980572	-4.28349
ENSMUSG00000027248	Pdia3	2	121244256	121269168	+	24913	-0.16055	7.79136	-1.70272	0.118998	0.980572	-4.29776
ENSMUSG00000022946	Dop1b	16	93508792	93607478	+	98687	0.224593	7.3922	1.70184	0.119166	0.980572	-4.29401
ENSMUSG00000078453	Abracl	10	17887008	17899036	-	12029	-0.390177	3.04999	-1.70011	0.1195	0.980572	-4.37109
ENSMUSG00000113750	Gm5628	13	18124493	18125541	+	1049	-0.289021	0.802286	-1.69891	0.11973	0.980572	-4.47467
ENSMUSG00000039640	Mrpl12	11	120375439	120379891	+	4453	-0.21055	5.45981	-1.69881	0.119749	0.980572	-4.28565
ENSMUSG00000028086	Fbxw7	3	84722575	84886505	+	163931	-0.174537	6.93846	-1.69848	0.119814	0.980572	-4.29062
ENSMUSG00000029528	Pxn	5	115644735	115694046	+	49312	0.181319	4.98813	1.69616	0.120263	0.980572	-4.29227
ENSMUSG00000024382	Ercc3	18	32373353	32403204	+	29852	0.156167	5.00279	1.69613	0.120269	0.980572	-4.29197
ENSMUSG00000042109	Csdc2	15	81820960	81835142	+	14183	-0.13242	6.73216	-1.69612	0.120269	0.980572	-4.28931
ENSMUSG00000025155	Dus1l	11	120680027	120687229	-	7203	-0.144027	5.068	-1.6951	0.120468	0.980572	-4.29234
ENSMUSG00000026335	Pam	1	97722839	98023371	-	300533	0.127687	7.67933	1.69347	0.120785	0.980572	-4.30217
ENSMUSG00000024217	Snrpc	17	28057124	28070942	+	13819	-0.202526	4.11243	-1.69339	0.120801	0.980572	-4.32245
ENSMUSG00000032010	Usp2	9	43978318	44006924	+	28607	-0.177246	6.5125	-1.69309	0.120858	0.980572	-4.28918
ENSMUSG00000111997	Gm5176	10	111336600	111337826	+	1227	-0.377396	0.334063	-1.69267	0.12094	0.980572	-4.49183
ENSMUSG00000050370		19	34451178	34452564	-	1387	-0.80895	1.11824	-1.69234	0.121003	0.980572	-4.45891
ENSMUSG00000036376	Abt1	13	23602531	23608036	-	5506	-0.185743	3.82823	-1.69233	0.121007	0.980572	-4.33553
ENSMUSG00000015090	Ptgds	2	25356721	25360058	-	3338	-0.463416	7.40082	-1.69215	0.12104	0.980572	-4.29996
ENSMUSG00000020910	Adprm	11	66928731	66943420	-	14690	-0.13809	4.62557	-1.69195	0.121081	0.980572	-4.30276
ENSMUSG00000028410	Dnaja1	4	40722150	40737149	+	15000	-0.199724	7.84675	-1.69177	0.121115	0.980572	-4.30502
ENSMUSG00000020922	Lsm12	11	102053323	102076122	-	22800	-0.178719	4.79771	-1.69155	0.121157	0.980572	-4.29926
ENSMUSG00000028708	Mknk1	4	115696395	115736447	+	40053	0.127127	5.64759	1.6908	0.121304	0.980572	-4.28932
ENSMUSG00000035759	Bbs10	10	111134540	111137588	+	3049	0.227984	2.49589	1.68996	0.121468	0.980572	-4.40191
ENSMUSG00000024841	Eif1ad	19	5416769	5421554	+	4786	-0.17271	4.39948	-1.68922	0.121614	0.980572	-4.31271
ENSMUSG00000036390	Gadd45a	6	67012080	67014441	-	2362	-0.289342	1.37021	-1.68898	0.12166	0.980572	-4.4534
ENSMUSG00000109362	Gm44562	7	58908603	58909949	-	1347	-0.709036	0.607964	-1.68701	0.122046	0.980572	-4.47971
ENSMUSG00000029330	Cds1	5	101912996	101971724	+	58729	0.148789	6.09441	1.68671	0.122106	0.980572	-4.29108
ENSMUSG00000034275	Igsf9b	9	27210500	27268842	+	58343	0.36233	6.96011	1.68496	0.12245	0.980572	-4.29922
ENSMUSG00000040681	Hmgn1	16	95921818	95928929	-	7112	-0.239669	6.38838	-1.68477	0.122486	0.980572	-4.29375
ENSMUSG00000102298	Gm33707	3	60677308	60677876	-	569	-0.544002	-1.43287	-1.68471	0.122498	0.980572	-4.5353
ENSMUSG00000103520	1110025M09Rik	15	81468375	81469229	-	855	0.429487	-0.58988	1.68461	0.122519	0.980572	-4.51865
ENSMUSG00000097164	Cep83os	10	94506887	94524438	-	17552	0.115956	5.25169	1.68375	0.122688	0.980572	-4.2963
ENSMUSG00000011254	Thg1l	11	45837670	45846321	-	8652	-0.214934	3.07207	-1.68213	0.123008	0.980572	-4.37725
ENSMUSG00000068874	Selenbp1	3	94840367	94852069	+	11703	-0.252094	2.90805	-1.68152	0.123127	0.980572	-4.38487
ENSMUSG00000030612	Mrpl46	7	78424984	78433279	-	8296	-0.212812	4.46902	-1.68126	0.123179	0.980572	-4.31511
ENSMUSG00000008763	Man1a2	3	100469524	100592819	-	123296	0.206334	7.52477	1.68113	0.123206	0.980572	-4.30847
ENSMUSG00000033955	Tnks1bp1	2	84878366	84903392	+	25027	0.194611	5.75769	1.67963	0.123502	0.980572	-4.29631
ENSMUSG00000069072	Slc7a14	3	31257007	31364527	-	107521	0.228007	7.59882	1.67958	0.123513	0.980572	-4.3101
ENSMUSG00000031391	L1cam	X	72897384	72939711	-	42328	0.238196	7.92576	1.678	0.123826	0.980572	-4.31365
ENSMUSG00000029860	Zyx	6	42326564	42337147	+	10584	-0.191646	4.22442	-1.67796	0.123833	0.980572	-4.32489
ENSMUSG00000086784	Isoc2a	7	4880152	4899972	+	19821	-0.221626	4.0012	-1.67792	0.123843	0.980572	-4.33466
ENSMUSG00000020620	Abca8b	11	109823016	109886671	-	63656	0.203736	5.73695	1.6776	0.123906	0.980572	-4.29765
ENSMUSG00000061315	Naca	10	127871444	127884506	+	13063	-0.24871	6.99507	-1.67737	0.123952	0.980572	-4.30366
ENSMUSG00000047036	Zfp445	9	122673594	122695071	-	21478	0.178031	8.06808	1.67727	0.123971	0.980572	-4.31559
ENSMUSG00000015879		5	45687047	45796956	-	109910	0.178558	5.97595	1.67723	0.123979	0.980572	-4.29725
ENSMUSG00000020087	Tysnd1	10	61531293	61538552	+	7260	-0.166648	4.47308	-1.6763	0.124165	0.980572	-4.31696
ENSMUSG00000044014	Npy5r	8	67132617	67140780	-	8164	-0.249597	3.35287	-1.67615	0.124194	0.980572	-4.36016
ENSMUSG00000002799	Jag2	12	112871439	112893396	-	21958	0.172674	5.63383	1.67607	0.12421	0.980572	-4.29914
ENSMUSG00000022965	Ifngr2	16	91343960	91362511	+	18552	-0.138222	4.61266	-1.67518	0.124388	0.980572	-4.31255
ENSMUSG00000032290	Ptpn9	9	56902207	56970091	+	67885	0.126741	5.88986	1.67417	0.124589	0.980572	-4.29937
ENSMUSG00000043411	Usp48	4	137321066	137385848	+	64783	0.163584	7.66268	1.67414	0.124595	0.980572	-4.3137
ENSMUSG00000116125	Gm41361	15	79896532	79926658	+	30127	0.246188	4.63851	1.67272	0.12488	0.980572	-4.31371
ENSMUSG00000006301	Tmbim1	1	74327406	74344781	-	17376	0.181418	5.19244	1.67271	0.124881	0.980572	-4.30429
ENSMUSG00000009292	Trpm2	10	77743556	77806397	-	62842	0.159703	5.62	1.67124	0.125176	0.980572	-4.30213
ENSMUSG00000000776	Polr3d	14	70676197	70680887	-	4691	-0.165694	3.9369	-1.67099	0.125227	0.980572	-4.34107
ENSMUSG00000098702	1500015A07Rik	18	61859461	61868988	+	9528	-0.31493	2.58625	-1.67081	0.125263	0.980572	-4.40365
ENSMUSG00000026278	Bok	1	93613382	93623486	+	10105	-0.314432	4.33063	-1.67018	0.12539	0.980572	-4.32646
ENSMUSG00000030279	C2cd5	6	142956646	143045867	-	89222	0.224036	7.77059	1.66818	0.125792	0.980572	-4.31828
ENSMUSG00000086308	G630016G05Rik	2	115897706	115916392	+	18687	0.145581	5.83001	1.66775	0.125878	0.980572	-4.30374
ENSMUSG00000024856	Cdk2ap2	19	4147182	4149019	+	1838	-0.183528	4.43884	-1.66691	0.126049	0.980572	-4.32476
ENSMUSG00000020868	Xylt2	11	94554677	94568341	-	13665	0.134693	4.54546	1.66606	0.12622	0.980572	-4.32101
ENSMUSG00000041488	Stx3	19	11752482	11796767	-	44286	0.146895	5.57326	1.66472	0.126492	0.980572	-4.30643
ENSMUSG00000020134	Peli1	11	21041291	21100323	+	59033	-0.153849	6.60577	-1.66436	0.126565	0.980572	-4.30851
ENSMUSG00000060716	Plekhh1	12	79075937	79128429	+	52493	0.284068	5.76879	1.66431	0.126574	0.980572	-4.30605
ENSMUSG00000044519		14	33689027	33700721	-	11695	0.29077	2.71934	1.6643	0.126578	0.980572	-4.39751
ENSMUSG00000006711	D130043K22Rik	13	25029118	25085253	+	56136	0.255224	5.47124	1.66401	0.126636	0.980572	-4.30754
ENSMUSG00000028221	Pip4p2	4	14864076	14915176	+	51101	-0.187728	5.96859	-1.66258	0.126926	0.980572	-4.30685
ENSMUSG00000078789	Dph1	11	75068469	75082067	-	13599	0.238775	4.14037	1.66118	0.127211	0.980572	-4.33733
ENSMUSG00000060981	H4c8	13	23715220	23715689	+	470	-0.490521	-1.24333	-1.66081	0.127285	0.980572	-4.53415
ENSMUSG00000025134	Alyref	11	120482947	120489191	-	6245	-0.166134	4.38721	-1.66069	0.127311	0.980572	-4.32887
ENSMUSG00000030306	Tmtc1	6	148133928	148345887	-	211960	0.197976	7.46322	1.66018	0.127414	0.980572	-4.32054
ENSMUSG00000028261	Ndufaf4	4	24898083	24905001	+	6919	-0.201315	5.50637	-1.65821	0.127817	0.980572	-4.31094
ENSMUSG00000030004	Nat8	6	85807370	85809064	-	1695	-0.324737	1.45694	-1.65798	0.127864	0.980572	-4.45809
ENSMUSG00000079523	Tmsb10	6	72934330	72935731	-	1402	-0.301583	5.49159	-1.65483	0.12851	0.980572	-4.31428
ENSMUSG00000020052	Ascl1	10	87326681	87329522	-	2842	-0.446234	1.12673	-1.6548	0.128516	0.980572	-4.47581
ENSMUSG00000104597	B230334C09Rik	3	157772823	157781749	-	8927	0.21429	7.86662	1.65426	0.128628	0.980572	-4.32754
ENSMUSG00000018554	Ybx2	11	69826622	69832431	+	5810	0.265433	2.40834	1.65169	0.129157	0.980572	-4.41943
ENSMUSG00000030062	Rpn1	6	88061464	88082286	+	20823	-0.124403	7.15706	-1.64992	0.129523	0.980572	-4.3229
ENSMUSG00000058715	Fcer1g	1	171057141	171061934	-	4794	-0.235092	3.07995	-1.64915	0.129682	0.980572	-4.39111
ENSMUSG00000032224	Fam81a	9	69995793	70049842	-	54050	-0.186826	5.95303	-1.64887	0.129741	0.980572	-4.31588
ENSMUSG00000027944	Hax1	3	89902753	89906087	-	3335	-0.1556	4.91696	-1.64832	0.129855	0.980572	-4.32389
ENSMUSG00000040524	Zfp609	9	65599673	65734846	-	135174	0.284804	6.37145	1.64731	0.130065	0.980572	-4.31737
ENSMUSG00000038876	Rnf146	10	29220172	29238438	-	18267	-0.149248	5.67704	-1.64698	0.130134	0.980572	-4.31753
ENSMUSG00000033760	Rbm4b	19	4806525	4817093	+	10569	-0.14737	4.84707	-1.6467	0.130191	0.980572	-4.32509
ENSMUSG00000021831	Ero1a	14	45520544	45556228	-	35685	0.232661	5.67958	1.64519	0.130505	0.980572	-4.31864
ENSMUSG00000024309	Pfdn6	17	34157795	34159317	-	1523	-0.259302	4.92667	-1.64495	0.130555	0.980572	-4.32629
ENSMUSG00000018677	Slc25a39	11	102293811	102298772	-	4962	-0.136983	5.63284	-1.64442	0.130666	0.980572	-4.31955
ENSMUSG00000028468	Rgp1	4	43578715	43587487	+	8773	0.161067	5.54963	1.64391	0.130773	0.980572	-4.31998
ENSMUSG00000026664	Phyh	2	4923830	4943541	+	19712	-0.212781	5.48641	-1.64323	0.130915	0.980572	-4.3209
ENSMUSG00000034610		4	108316623	108416618	+	99996	0.224445	5.875	1.64276	0.131013	0.980572	-4.31971
ENSMUSG00000021819	Zswim8	14	20757620	20773687	+	16068	0.192045	7.56115	1.64223	0.131124	0.980572	-4.33153
ENSMUSG00000040729	Cep126	9	8076462	8134295	-	57834	0.187625	5.10125	1.64214	0.131143	0.980572	-4.32408
ENSMUSG00000031985	Gnpat	8	125589772	125616796	+	27025	0.122801	6.50073	1.63955	0.131686	0.980572	-4.3232
ENSMUSG00000031295	Phka2	X	159285162	159381874	+	96713	0.178784	5.86761	1.63824	0.131962	0.980572	-4.32264
ENSMUSG00000030246	Ldhb	6	142435975	142453683	-	17709	-0.189096	8.85725	-1.63802	0.132007	0.980572	-4.3444
ENSMUSG00000026547	Tagln2	1	172327614	172334947	+	7334	-0.220089	3.02876	-1.63726	0.132167	0.980572	-4.39716
ENSMUSG00000057378		2	112461700	113047441	-	585742	0.251734	8.23857	1.63644	0.132342	0.980572	-4.34037
ENSMUSG00000038255	Neurod2	11	98216241	98220474	-	4234	-1.4971	-0.664372	-1.63641	0.132347	0.980572	-4.52495
ENSMUSG00000063455		6	38100109	38230944	-	130836	0.325983	6.11796	1.63502	0.13264	0.980572	-4.32459
ENSMUSG00000039725	Trp53rka	2	165332030	165335244	-	3215	-0.222606	3.43066	-1.63419	0.132816	0.980572	-4.38049
ENSMUSG00000021703	Serinc5	13	92747599	92848455	+	100857	0.19862	6.95954	1.63387	0.132884	0.980572	-4.33122
ENSMUSG00000032352		9	77338105	77452152	-	114048	0.140573	5.92806	1.63262	0.133149	0.980572	-4.32617
ENSMUSG00000036299	BC031181	18	75138939	75143223	+	4285	-0.183748	6.09795	-1.63247	0.13318	0.980572	-4.3265
ENSMUSG00000027309	Dnaaf9	2	130548120	130748326	-	200207	0.185435	7.83663	1.63237	0.133201	0.980572	-4.33982
ENSMUSG00000042662	Dusp15	2	152782917	152793618	-	10702	0.209134	4.31365	1.6311	0.133472	0.980572	-4.34845
ENSMUSG00000023330	Dtwd1	2	125994061	126007199	+	13139	0.148359	3.66023	1.63098	0.133497	0.980572	-4.37225
ENSMUSG00000019738	Polr2i	7	29931373	29932815	+	1443	-0.282833	3.56677	-1.63048	0.133604	0.980572	-4.37816
ENSMUSG00000040774	Cept1	3	106409576	106455118	-	45543	-0.185115	5.64107	-1.63006	0.133694	0.980572	-4.32846
ENSMUSG00000047139	Cd24a	10	43454280	43460261	+	5982	-0.500595	2.7471	-1.62841	0.134046	0.980572	-4.4188
ENSMUSG00000063694	Cycs	6	50539543	50543518	-	3976	-0.181274	5.32962	-1.62808	0.134115	0.980572	-4.33157
ENSMUSG00000100164	2610306M01Rik	6	86825381	86826422	-	1042	-0.325721	1.95278	-1.62717	0.134309	0.980572	-4.44778
ENSMUSG00000103731	Gm17530	9	86428735	86429206	-	472	-0.404186	-0.0275112	-1.62709	0.134328	0.980572	-4.51189
ENSMUSG00000039318	Rab3gap2	1	184936314	185018956	+	82643	0.166527	7.19432	1.62657	0.134439	0.980572	-4.33759
ENSMUSG00000117592	Gm46603	17	29538955	29541523	-	2569	0.357299	0.59966	1.62603	0.134555	0.980572	-4.49493
ENSMUSG00000035093	Secisbp2l	2	125578906	125624790	-	45885	0.190862	7.28871	1.62574	0.134616	0.980572	-4.33926
ENSMUSG00000051246		5	35065356	35081183	+	15828	-0.150066	3.3245	-1.62451	0.134879	0.980572	-4.38927
ENSMUSG00000025024	Smndc1	19	53367821	53379009	-	11189	-0.169627	5.1022	-1.62375	0.135042	0.980572	-4.33566
ENSMUSG00000046027	Stard5	7	83281167	83302335	+	21169	-0.554457	5.38526	-1.62339	0.13512	0.980572	-4.33613
ENSMUSG00000044461	Shisa2	14	59862757	59869109	+	6353	-0.592258	3.24253	-1.62333	0.135133	0.980572	-4.39214
ENSMUSG00000021488	Nsd1	13	55357595	55466138	+	108544	0.209135	7.53978	1.62213	0.135391	0.980572	-4.34363
ENSMUSG00000025702	Marchf8	6	116314985	116386501	+	71517	0.175055	6.26422	1.62122	0.135587	0.980572	-4.33404
ENSMUSG00000047238	Mageh1	X	151819162	151820571	-	1410	-0.192852	5.10404	-1.62062	0.135716	0.980572	-4.33809
ENSMUSG00000064337	mt-Rnr1	MT	70	1024	+	955	-0.302353	11.61	-1.62055	0.135732	0.980572	-4.37791
ENSMUSG00000057156	Homez	14	55090193	55108418	-	18226	-0.15432	4.03248	-1.6203	0.135786	0.980572	-4.3629
ENSMUSG00000087177	E130307A14Rik	10	39497408	39608003	-	110596	0.201915	6.39401	1.61931	0.136	0.980572	-4.33549
ENSMUSG00000036529	Sbf1	15	89172439	89199514	-	27076	0.189355	7.76402	1.61739	0.136416	0.980572	-4.3479
ENSMUSG00000112302	Gm48226	12	78269060	78273299	-	4240	-0.209613	2.6274	-1.61713	0.136471	0.980572	-4.41863
ENSMUSG00000024146	Cript	17	87332978	87343238	+	10261	-0.275081	5.51869	-1.61688	0.136527	0.980572	-4.33752
ENSMUSG00000039754	Alkbh4	5	136165000	136170469	+	5470	-0.183613	2.56835	-1.61681	0.136541	0.980572	-4.42334
ENSMUSG00000087184	Gm11650	11	107684692	107686808	+	2117	0.415943	0.212895	1.6163	0.136652	0.980572	-4.51047
ENSMUSG00000032501	Trib1	15	59520199	59528948	+	8750	-0.275088	3.76651	-1.61516	0.136899	0.980572	-4.3753
ENSMUSG00000046717	Igbp1b	6	138634087	138635542	-	1456	0.551769	-0.2431	1.61506	0.136921	0.980572	-4.52009
ENSMUSG00000029670	Ing3	6	21949570	21976037	+	26468	-0.164484	4.48958	-1.61495	0.136946	0.980572	-4.35164
ENSMUSG00000025451	Paip1	13	119565137	119594754	+	29618	-0.163815	5.92788	-1.61475	0.136989	0.980572	-4.33785
ENSMUSG00000033055	Ankrd54	15	78937294	78947093	-	9800	-0.150218	4.03926	-1.6147	0.137	0.980572	-4.3665
ENSMUSG00000076617	Ighm	12	113382178	113386350	-	4173	-0.473736	2.96118	-1.61424	0.137101	0.980572	-4.40633
ENSMUSG00000030621	Me3	7	89281600	89503567	+	221968	0.167728	6.97171	1.61355	0.137251	0.980572	-4.3435
ENSMUSG00000021066	Atl1	12	69939388	70013191	+	73804	0.14184	6.8607	1.61322	0.137323	0.980572	-4.34268
ENSMUSG00000038831	Ralgps1	2	33023429	33261498	-	238070	0.282257	7.10142	1.61321	0.137324	0.980572	-4.3451
ENSMUSG00000032215	Rsl24d1	9	73020708	73030615	+	9908	-0.22545	4.58081	-1.61275	0.137426	0.980572	-4.35129
ENSMUSG00000035505	Cox18	5	90362583	90371860	-	9278	0.12376	4.71098	1.61242	0.137497	0.980572	-4.34806
ENSMUSG00000027297	Ltk	2	119581801	119590912	-	9112	0.207983	3.7726	1.61221	0.137543	0.980572	-4.37791
ENSMUSG00000026753	Ppp6c	2	39084366	39116463	-	32098	-0.170973	5.89629	-1.61216	0.137553	0.980572	-4.3394
ENSMUSG00000048483	Zdhhc22	12	87027537	87037204	-	9668	0.291008	4.67465	1.61132	0.137738	0.980572	-4.35033
ENSMUSG00000034308	Sdr42e1	8	118388138	118400428	-	12291	0.187589	3.22315	1.60979	0.138073	0.980572	-4.40061
ENSMUSG00000063406	Tmed5	5	108254232	108280486	-	26255	-0.397463	5.07984	-1.60894	0.138258	0.980572	-4.34529
ENSMUSG00000036273	Lrrk2	15	91557378	91700323	+	142946	0.311764	7.77044	1.60769	0.138533	0.980572	-4.35383
ENSMUSG00000026074	Map4k4	1	39940073	40065470	+	125398	0.172481	7.44194	1.60651	0.138792	0.980572	-4.3519
ENSMUSG00000059866	Tnip2	5	34653431	34671335	-	17905	0.163217	4.60468	1.60575	0.138961	0.980572	-4.3543
ENSMUSG00000031376	Atp2b3	X	72546692	72614611	+	67920	0.388957	6.88443	1.6049	0.139149	0.980572	-4.34832
ENSMUSG00000052533		2	30176409	30234278	+	57870	0.170933	4.98039	1.60329	0.139503	0.980572	-4.34973
ENSMUSG00000102504	Gm21955	4	42714926	42719893	+	4968	0.328922	1.60708	1.60278	0.139616	0.980572	-4.46539
ENSMUSG00000066880	Zfp617	8	72662479	72688473	+	25995	-0.14045	4.62827	-1.60258	0.139661	0.980572	-4.35506
ENSMUSG00000068099	1500009C09Rik	15	82136598	82144954	+	8357	-0.194178	6.52101	-1.60227	0.139729	0.980572	-4.34716
ENSMUSG00000034255	Arhgap27	11	103222323	103254518	-	32196	0.157943	4.57729	1.60217	0.139752	0.980572	-4.35702
ENSMUSG00000030515	Tarsl2	7	65294646	65341839	+	47194	0.173647	5.17134	1.60133	0.139937	0.980572	-4.34924
ENSMUSG00000003814	Calr	8	85568479	85573563	-	5085	-0.151541	8.65236	-1.60025	0.140176	0.980572	-4.36362
ENSMUSG00000115317	Gm32618	15	32779050	32796152	+	17103	0.252393	4.4393	1.59892	0.140473	0.980572	-4.36052
ENSMUSG00000020519	Sap30l	11	57692463	57701043	+	8581	-0.178286	4.26951	-1.59891	0.140476	0.980572	-4.36737
ENSMUSG00000020328	Nudcd2	11	40624494	40630873	+	6380	-0.176624	3.76145	-1.59886	0.140487	0.980572	-4.38364
ENSMUSG00000045482	Trrap	5	144704542	144796588	+	92047	0.26898	8.30342	1.5972	0.140855	0.980572	-4.36311
ENSMUSG00000032745	Gpbp1	13	111562214	111626645	-	64432	-0.263304	5.81631	-1.59719	0.140858	0.980572	-4.34923
ENSMUSG00000003778	Brd8	18	34731668	34757654	-	25987	0.10855	6.41609	1.59714	0.140869	0.980572	-4.34967
ENSMUSG00000040856	Dlk1	12	109418749	109429262	+	10514	0.364982	7.3553	1.59671	0.140966	0.980572	-4.35676
ENSMUSG00000085396	Firre	X	49644621	49724198	-	79578	0.143831	7.34444	1.59664	0.140982	0.980572	-4.35704
ENSMUSG00000034157	Cipc	12	86993817	87012136	+	18320	0.127919	7.1947	1.59606	0.14111	0.980572	-4.35626
ENSMUSG00000000171	Sdhd	9	50507657	50515112	-	7456	-0.142017	6.41645	-1.59467	0.141421	0.980572	-4.35142
ENSMUSG00000064043		17	47451801	47672883	+	221083	0.217513	7.04067	1.59441	0.141478	0.980572	-4.35574
ENSMUSG00000068154	Insm1	2	146063841	146066940	+	3100	-0.210608	3.26727	-1.59426	0.141513	0.980572	-4.40457
ENSMUSG00000035247	Hectd1	12	51790505	51876319	-	85815	0.227157	7.29544	1.5935	0.141683	0.980572	-4.35858
ENSMUSG00000023473	Celsr3	9	108703519	108730168	+	26650	0.285301	7.55271	1.59297	0.141802	0.980572	-4.36067
ENSMUSG00000004748	Mtfp1	11	4041480	4045445	-	3966	-0.220487	4.45143	-1.59234	0.141944	0.980572	-4.36591
ENSMUSG00000025337	Sbds	5	130274572	130284371	-	9800	-0.140438	5.95571	-1.59217	0.141981	0.980572	-4.35234
ENSMUSG00000030247	Kcnj8	6	142510563	142517340	-	6778	-0.2821	1.8462	-1.5921	0.141998	0.980572	-4.46071
ENSMUSG00000035851	Ythdc1	5	86952080	86984518	+	32439	-0.160467	6.58561	-1.59093	0.142261	0.980572	-4.35472
ENSMUSG00000022948	Setd4	16	93380345	93400951	-	20607	0.141453	4.98223	1.59046	0.142366	0.980572	-4.3576
ENSMUSG00000027076	Timm10	2	84657341	84660557	+	3217	-0.222879	4.01758	-1.59011	0.142445	0.980572	-4.37995
ENSMUSG00000044288	Cnr1	4	33924593	33948831	+	24239	0.240429	6.39608	1.58992	0.142488	0.980572	-4.35444
ENSMUSG00000014905	Dnajb9	12	44252342	44257109	-	4768	-0.249868	5.34804	-1.58966	0.142546	0.980572	-4.35528
ENSMUSG00000039148	Sart1	19	5427551	5438731	-	11181	-0.125847	5.94865	-1.58882	0.142735	0.980572	-4.35452
ENSMUSG00000049881	2810025M15Rik	1	157239922	157247806	+	7885	-0.24454	2.59855	-1.58879	0.142743	0.980572	-4.43437
ENSMUSG00000030545	Pex11a	7	79385705	79392879	-	7175	-0.159338	3.58689	-1.58869	0.142765	0.980572	-4.39468
ENSMUSG00000068040	Tm9sf4	2	153003223	153052386	+	49164	0.140633	6.91106	1.58862	0.142781	0.980572	-4.35833
ENSMUSG00000031765	Mt1	8	94905710	94906955	+	1246	-0.252444	7.15894	-1.5881	0.142897	0.980572	-4.36043
ENSMUSG00000092187	Gm20457	7	63987298	63995712	-	8415	-0.294561	2.16841	-1.58771	0.142987	0.980572	-4.44968
ENSMUSG00000027257	Pacsin3	2	91086299	91095024	+	8726	-0.182274	4.21172	-1.58738	0.143061	0.980572	-4.37554
ENSMUSG00000079111	Kdelr2	5	143389593	143407656	+	18064	-0.146466	4.49578	-1.58704	0.143139	0.980572	-4.36744
ENSMUSG00000108368	Gm45053	6	72579987	72582485	-	2499	-0.329737	0.608006	-1.58626	0.143314	0.980572	-4.50217
ENSMUSG00000027655		2	158636727	158700134	+	63408	0.15471	5.267	1.5852	0.143555	0.980572	-4.35853
ENSMUSG00000006941	Eif1b	9	120321298	120324396	+	3099	-0.192638	6.10621	-1.58501	0.143598	0.980572	-4.35691
ENSMUSG00000032184	Lysmd2	9	75533023	75545053	+	12031	-0.133494	5.48418	-1.58484	0.143637	0.980572	-4.35792
ENSMUSG00000015536	Mocs2	13	114954772	114968811	+	14040	-0.167281	5.26462	-1.5842	0.143781	0.980572	-4.35935
ENSMUSG00000006403	Adamts4	1	171077990	171088206	+	10217	0.289299	4.86824	1.58321	0.144006	0.980572	-4.3631
ENSMUSG00000038704	Aspdh	7	44114815	44117182	+	2368	-0.200635	1.92007	-1.58204	0.144274	0.980572	-4.45945
ENSMUSG00000075415	Fnbp1	2	30916218	31032020	-	115803	0.238168	7.53857	1.5819	0.144305	0.980572	-4.36722
ENSMUSG00000009569	Mrtfb	16	13074345	13235393	+	161049	0.234855	8.78672	1.58096	0.14452	0.980572	-4.37551
ENSMUSG00000038418	Egr1	18	34992876	34998037	+	5162	-0.273307	8.12002	-1.58029	0.144672	0.980572	-4.37147
ENSMUSG00000008036	Ap2s1	7	16472335	16483219	+	10885	-0.22851	6.55959	-1.57932	0.144893	0.980572	-4.36178
ENSMUSG00000025241	Fyco1	9	123618565	123680964	-	62400	0.541576	6.73584	1.57929	0.1449	0.980572	-4.36327
ENSMUSG00000024927	Rela	19	5687511	5698158	+	10648	-0.110199	4.81306	-1.57916	0.144931	0.980572	-4.36694
ENSMUSG00000043439	Epop	11	97518215	97520528	-	2314	-0.417444	3.45364	-1.57893	0.144983	0.980572	-4.40521
ENSMUSG00000027889	Ampd2	3	107981378	107993967	-	12590	0.137344	6.51821	1.57824	0.145142	0.980572	-4.36207
ENSMUSG00000027692	Tnik	3	28317363	28730007	+	412645	0.182102	7.97514	1.57816	0.145159	0.980572	-4.3721
ENSMUSG00000043987		9	45678244	45739989	-	61746	0.235896	5.10537	1.57799	0.145198	0.980572	-4.36421
ENSMUSG00000039354	Smarcal1	1	72622410	72672293	+	49884	0.189246	6.11103	1.57773	0.145258	0.980572	-4.36132
ENSMUSG00000108325	Gm44898	7	54925684	54927906	+	2223	-0.363817	0.931516	-1.57766	0.145275	0.980572	-4.49358
ENSMUSG00000117901		19	7064834	7065786	-	953	-0.312009	2.87512	-1.57671	0.145493	0.980572	-4.42537
ENSMUSG00000026197	Zfand2b	1	75145290	75148273	+	2984	-0.253166	3.50967	-1.57616	0.145619	0.980572	-4.40532
ENSMUSG00000109008	Gm44899	7	80630594	80643163	-	12570	0.293038	2.90919	1.57571	0.145723	0.980572	-4.42393
ENSMUSG00000040659	Efhd2	4	141585453	141602231	-	16779	-0.207645	6.09345	-1.57488	0.145913	0.980572	-4.36341
ENSMUSG00000022300	Dcaf13	15	38976260	39010251	+	33992	0.136065	5.79586	1.57462	0.145972	0.980572	-4.36347
ENSMUSG00000045752	Tssc4	7	142622986	142624830	+	1845	-0.195183	4.45761	-1.57452	0.145995	0.980572	-4.37627
ENSMUSG00000049553	Polr1a	6	71886037	71961919	+	75883	0.134386	5.87802	1.57418	0.146073	0.980572	-4.36368
ENSMUSG00000039623	Ap5z1	5	142449699	142464465	+	14767	0.125959	4.95161	1.57415	0.146081	0.980572	-4.3681
ENSMUSG00000031266	Gla	X	133488898	133501874	-	12977	-0.168527	3.29515	-1.57261	0.146436	0.980572	-4.41173
ENSMUSG00000082474	Gm8213	6	116172379	116172819	-	441	-0.486488	-2.1112	-1.57193	0.146593	0.980572	-4.55347
ENSMUSG00000025732	Mcrip2	17	26082672	26087738	-	5067	-0.188896	2.98684	-1.57161	0.146667	0.980572	-4.42445
ENSMUSG00000030096	Slc6a6	6	91661034	91736047	+	75014	0.184988	7.74727	1.57102	0.146803	0.980572	-4.37495
ENSMUSG00000030990		7	101859415	101887774	+	28360	0.135252	3.95371	1.57008	0.14702	0.980572	-4.39111
ENSMUSG00000037300	Ttc13	8	125398071	125448722	-	50652	0.172251	5.7094	1.56996	0.147048	0.980572	-4.36661
ENSMUSG00000024006	Stk38	17	29189854	29226969	-	37116	0.14881	6.20042	1.56949	0.147159	0.980572	-4.36665
ENSMUSG00000021275	Tecpr2	12	110855698	110938828	+	83131	0.165221	6.65253	1.56921	0.147223	0.980572	-4.36859
ENSMUSG00000052253	Zfp622	15	25984452	25998567	+	14116	-0.17759	5.14899	-1.56841	0.147408	0.980572	-4.37007
ENSMUSG00000029755	Dlx5	6	6877805	6882085	-	4281	-0.161557	4.33272	-1.56835	0.147423	0.980572	-4.38218
ENSMUSG00000007041	Clic1	17	35268942	35277725	+	8784	-0.247034	2.99798	-1.56823	0.147451	0.980572	-4.42578
ENSMUSG00000100475	Gm29543	13	96269877	96270843	+	967	-0.578632	-0.29051	-1.56694	0.14775	0.980572	-4.52682
ENSMUSG00000049907	Rasl11b	5	74355947	74360142	+	4196	-0.241318	3.86908	-1.56662	0.147825	0.980572	-4.3965
ENSMUSG00000033862	Cdk10	8	123951581	123958989	+	7409	0.120406	5.01919	1.56651	0.14785	0.980572	-4.3721
ENSMUSG00000110020	Gm45441	7	45480319	45484673	+	4355	0.270603	2.98945	1.56627	0.147907	0.980572	-4.42674
ENSMUSG00000034709	Ppp1r21	17	88837546	88895795	+	58250	0.110215	6.56857	1.56513	0.148171	0.980572	-4.37051
ENSMUSG00000033126	Ybey	10	76295401	76304948	-	9548	-0.203226	2.58253	-1.56493	0.148217	0.980572	-4.44056
ENSMUSG00000048899	Rimkla	4	119322480	119349825	-	27346	0.204103	5.38816	1.56387	0.148466	0.980572	-4.37129
ENSMUSG00000021772	Nkiras1	14	4185693	4198560	-	12868	-0.158765	6.07873	-1.56334	0.14859	0.980572	-4.37055
ENSMUSG00000037070	Rbmxl1	8	79231898	79235527	-	3630	-0.190653	3.76808	-1.56149	0.149024	0.980572	-4.40266
ENSMUSG00000029401	Rilpl2	5	124601328	124616429	-	15102	-0.185073	3.73209	-1.56129	0.14907	0.980572	-4.4033
ENSMUSG00000024558	Mapk4	18	74061557	74198430	-	136874	0.145719	6.93974	1.56123	0.149084	0.980572	-4.37536
ENSMUSG00000020785	Camkk1	11	72909834	72932899	+	23066	0.124335	6.99273	1.56066	0.149217	0.980572	-4.3759
ENSMUSG00000058709	Egln2	7	26858083	26866227	-	8145	-0.137739	6.46168	-1.55992	0.14939	0.980572	-4.37349
ENSMUSG00000001173	Ocrl	X	47001264	47054745	+	53482	0.221032	7.18704	1.55896	0.149616	0.980572	-4.37843
ENSMUSG00000007659	Bcl2l1	2	152622588	152673648	-	51061	-0.111677	6.7336	-1.55851	0.149724	0.980572	-4.37561
ENSMUSG00000070687	Htr1d	4	136150835	136171709	+	20875	0.18059	4.31933	1.55826	0.149781	0.980572	-4.38699
ENSMUSG00000022234	Cct5	15	31590946	31601950	-	11005	-0.151925	7.30882	-1.55738	0.149989	0.980572	-4.37991
ENSMUSG00000035735	Dagla	19	10222629	10282241	-	59613	0.202592	6.5059	1.55723	0.150024	0.980572	-4.37525
ENSMUSG00000089687	Rab42	4	132029508	132030696	-	1189	0.322925	-0.288406	1.55605	0.150304	0.980572	-4.52794
ENSMUSG00000015312	Gadd45b	10	80765907	80768038	+	2132	-0.322274	3.07254	-1.5556	0.150409	0.980572	-4.42779
ENSMUSG00000060240	Cend1	7	141006359	141009404	-	3046	-0.150376	7.55273	-1.55512	0.150524	0.980572	-4.38285
ENSMUSG00000038773	Kdm3b	18	34910100	34971713	+	61614	0.188343	6.40726	1.55445	0.15068	0.980572	-4.3766
ENSMUSG00000034032	Rpap1	2	119593785	119618018	-	24234	0.143109	5.13237	1.55328	0.150957	0.980572	-4.37923
ENSMUSG00000021476	Habp4	13	64309638	64334351	+	24714	-0.129762	7.55791	-1.55298	0.151028	0.980572	-4.38416
ENSMUSG00000033938	Ndufb7	8	84293300	84298255	+	4956	-0.269014	5.50916	-1.55112	0.151471	0.980572	-4.37939
ENSMUSG00000036751	Cox6b1	7	30316286	30325576	-	9291	-0.215202	7.04604	-1.55079	0.151549	0.980572	-4.38207
ENSMUSG00000110525	Gm45893	8	123563290	123563536	+	247	0.571157	-1.49105	1.54982	0.15178	0.980572	-4.54997
ENSMUSG00000035248	Tut7	13	59919375	59970961	-	51587	0.236809	5.78591	1.54965	0.151821	0.980572	-4.37926
ENSMUSG00000118663	Spata5l1	2	122461120	122474750	+	13631	-0.127672	3.78931	-1.54951	0.151854	0.980572	-4.40622
ENSMUSG00000037410	Tbc1d2b	9	90084080	90152857	-	68778	0.193788	5.55402	1.54889	0.152002	0.980572	-4.38021
ENSMUSG00000053137	Mapk11	15	89026689	89033831	-	7143	-0.274997	3.42218	-1.54851	0.152093	0.980572	-4.41953
ENSMUSG00000083757		4	131947299	131947800	-	502	-0.629255	-2.07756	-1.54826	0.152152	0.980572	-4.55441
ENSMUSG00000008384	Sertad1	7	27186335	27189741	+	3407	-0.331309	2.84775	-1.5476	0.152309	0.980572	-4.44021
ENSMUSG00000022257	Laptm4b	15	34238174	34284448	+	46275	-0.148747	5.4298	-1.54716	0.152417	0.980572	-4.3817
ENSMUSG00000045092	S1pr1	3	115504082	115508721	-	4640	-0.131252	7.47396	-1.54672	0.15252	0.980572	-4.38748
ENSMUSG00000025006	Sorbs1	19	40283197	40502223	-	219027	0.524757	7.42926	1.54658	0.152555	0.980572	-4.38728
ENSMUSG00000097268	Gm26805	1	37904380	37910469	+	6090	0.273612	2.35968	1.5457	0.152764	0.980572	-4.45461
ENSMUSG00000049672	Zbtb14	17	69690045	69698194	+	8150	0.126723	4.11716	1.54469	0.153007	0.980572	-4.40025
ENSMUSG00000024528	Srfbp1	18	52598765	52625003	+	26239	-0.123292	4.42473	-1.54457	0.153036	0.980572	-4.39276
ENSMUSG00000020644	Id2	12	25143798	25147139	-	3342	-0.170638	5.48055	-1.54449	0.153056	0.980572	-4.38321
ENSMUSG00000084932	Gm15156	X	154405785	154406357	+	573	-0.892384	-1.96186	-1.54393	0.15319	0.980572	-4.55216
ENSMUSG00000025217	Btrc	19	45352173	45518452	+	166280	0.152221	7.14399	1.5439	0.153198	0.980572	-4.387
ENSMUSG00000034771	Tle2	10	81410395	81426679	+	16285	0.146025	4.64486	1.5428	0.153461	0.980572	-4.39106
ENSMUSG00000052102	Gnpda1	18	38460588	38472056	-	11469	0.145433	4.60406	1.54275	0.153472	0.980572	-4.39084
ENSMUSG00000024743	Syt7	19	10366454	10430544	+	64091	0.23619	8.31679	1.54219	0.153608	0.980572	-4.39423
ENSMUSG00000024909	Efemp2	19	5523982	5532545	+	8564	-0.170918	3.23316	-1.54179	0.153704	0.980572	-4.42832
ENSMUSG00000058594	Fbh1	2	11747384	11782393	-	35010	0.118015	6.99651	1.54099	0.153898	0.980572	-4.38792
ENSMUSG00000074129	Rpl13a	7	44774982	44778185	-	3204	-0.275309	3.69918	-1.54065	0.15398	0.980572	-4.41447
ENSMUSG00000022247	Brix1	15	10474865	10486033	-	11169	-0.16109	4.409	-1.53966	0.154218	0.980572	-4.3961
ENSMUSG00000084950	Gm5577	6	87957865	87982453	+	24589	0.15592	4.67916	1.53893	0.154394	0.980572	-4.392
ENSMUSG00000018666	Cbx1	11	96679953	96699466	+	19514	-0.145873	5.47404	-1.53879	0.154427	0.980572	-4.38672
ENSMUSG00000026930	Gpsm1	2	26205527	26238249	+	32723	0.144039	6.77477	1.53768	0.154696	0.980572	-4.38861
ENSMUSG00000020591	Ntsr2	12	16703383	16710228	+	6846	-0.150117	6.73827	-1.5373	0.154789	0.980572	-4.38883
ENSMUSG00000023913	Pla2g7	17	43878989	43923092	+	44104	-0.203467	6.33559	-1.53612	0.155074	0.980572	-4.38806
ENSMUSG00000031799	Tpm4	8	72884018	72906986	+	22969	-0.179201	4.8633	-1.53579	0.155155	0.980572	-4.39179
ENSMUSG00000058486	Wdr91	6	34857361	34887811	-	30451	0.140738	4.95489	1.53485	0.155383	0.980572	-4.39155
ENSMUSG00000022003		14	75997557	76024477	-	26921	0.162594	4.28382	1.53481	0.155392	0.980572	-4.40103
ENSMUSG00000020549	Elac2	11	64869864	64892895	+	23032	0.10975	5.49261	1.53476	0.155406	0.980572	-4.38921
ENSMUSG00000037172	Dennd11	6	40378309	40413069	-	34761	0.162635	7.25571	1.53459	0.155447	0.980572	-4.39331
ENSMUSG00000038914	Dido1	2	180299757	180351792	-	52036	0.17192	6.83897	1.53396	0.155599	0.980572	-4.39132
ENSMUSG00000031231	Cox7b	X	105059306	105066056	+	6751	-0.208201	6.76914	-1.53357	0.155694	0.980572	-4.3911
ENSMUSG00000060904	Arl1	10	88566720	88579956	+	13237	-0.165839	6.26844	-1.53317	0.155792	0.980572	-4.38974
ENSMUSG00000028773	Fabp3	4	130202388	130209256	+	6869	-0.237978	4.44086	-1.5325	0.155955	0.980572	-4.39992
ENSMUSG00000038180	Spag4	2	155907095	155912537	+	5443	-0.242765	1.84823	-1.53177	0.156133	0.980572	-4.47608
ENSMUSG00000087026	A230103J11Rik	8	85779789	85787089	-	7301	0.189151	3.60496	1.53103	0.156315	0.980572	-4.422
ENSMUSG00000028412	Slc44a1	4	53440413	53622478	+	182066	0.137104	6.65477	1.53078	0.156376	0.980572	-4.3924
ENSMUSG00000084946	Dlx1as	2	71346798	71368235	-	21438	-0.150602	4.23594	-1.53076	0.15638	0.980572	-4.40582
ENSMUSG00000027359		2	126394327	126430163	+	35837	0.165454	4.2459	1.53066	0.156405	0.980572	-4.4045
ENSMUSG00000002820	Atg4d	9	21176589	21189068	+	12480	-0.123025	4.82461	-1.53054	0.156436	0.980572	-4.39538
ENSMUSG00000016995	Matn4	2	164231313	164247080	-	15768	0.191905	3.88782	1.53051	0.156443	0.980572	-4.41315
ENSMUSG00000037014	Sstr4	2	148237264	148238687	+	1424	0.459615	2.43286	1.53015	0.15653	0.980572	-4.45802
ENSMUSG00000042487	Leo1	9	75348806	75373714	+	24909	-0.15679	4.39005	-1.53004	0.156557	0.980572	-4.40228
ENSMUSG00000061589	Dot1l	10	80591040	80631295	+	40256	0.224937	7.0304	1.52977	0.156624	0.980572	-4.39477
ENSMUSG00000033105	Lss	10	76367422	76392972	+	25551	0.147284	5.30469	1.52962	0.15666	0.980572	-4.39289
ENSMUSG00000049489	Ccnq	11	78641332	78642555	-	1224	-0.205234	3.60341	-1.5295	0.156689	0.980572	-4.42108
ENSMUSG00000020289	Nprl3	11	32175628	32217707	-	42080	0.125613	5.65742	1.52843	0.156951	0.980572	-4.39282
ENSMUSG00000074406	Zfp628	7	4918216	4925001	+	6786	-0.146166	3.72567	-1.52756	0.157167	0.980572	-4.41897
ENSMUSG00000064342	mt-Ti	MT	3706	3774	+	69	-0.713995	3.15125	-1.52744	0.157196	0.980572	-4.43229
ENSMUSG00000026200	Glb1l	1	75174880	75187457	-	12578	0.191976	3.82219	1.52565	0.157636	0.980572	-4.41774
ENSMUSG00000018363	Smurf2	11	106710892	106811541	-	100650	0.15427	6.09255	1.52506	0.157781	0.980572	-4.39457
ENSMUSG00000095041		JH584304.1	52190	59690	-	7501	0.378819	8.44984	1.52493	0.157813	0.980572	-4.40448
ENSMUSG00000004113	Cacna1b	2	24493899	24653164	-	159266	0.283576	7.73854	1.52488	0.157826	0.980572	-4.40141
ENSMUSG00000085565	Gm15721	5	147886692	147893976	-	7285	-0.270721	2.44033	-1.52455	0.157906	0.980572	-4.45844
ENSMUSG00000062309	Rpp25	9	57411309	57412731	+	1423	-0.218613	3.63926	-1.5242	0.157992	0.980572	-4.42349
ENSMUSG00000022555	Dgat1	15	76386215	76396153	-	9939	0.121697	5.21271	1.52409	0.158019	0.980572	-4.39664
ENSMUSG00000031904	Slc7a6	8	106895489	106925338	+	29850	0.121272	5.54301	1.52406	0.158026	0.980572	-4.3957
ENSMUSG00000029009	Mthfr	4	148123534	148144008	+	20475	0.152752	5.28918	1.5238	0.158093	0.980572	-4.39665
ENSMUSG00000050908	Tvp23a	16	10238421	10265226	-	26806	0.184466	5.59388	1.5234	0.158189	0.980572	-4.39604
ENSMUSG00000060860	Ube2s	7	4797545	4815589	-	18045	-0.212621	4.24663	-1.52322	0.158235	0.980572	-4.40941
ENSMUSG00000054874	Pcnx3	19	5714663	5738936	-	24274	0.216828	6.55942	1.5223	0.158463	0.980572	-4.39718
ENSMUSG00000044768	Macir	1	97534043	97589799	-	55757	-0.186408	4.96741	-1.52154	0.158649	0.980572	-4.39947
ENSMUSG00000038141	Tmem181a	17	6307135	6358589	+	51455	0.121471	5.51663	1.52141	0.158683	0.980572	-4.39744
ENSMUSG00000097466	D430036J16Rik	9	81513604	81527209	+	13606	0.191034	5.05843	1.5213	0.15871	0.980572	-4.39882
ENSMUSG00000071337	Tia1	6	86381201	86410387	+	29187	0.349964	6.50074	1.52079	0.158835	0.980572	-4.39829
ENSMUSG00000064372	mt-Tp	MT	15356	15422	-	67	-0.719276	0.791917	-1.52061	0.15888	0.980572	-4.5096
ENSMUSG00000028062	Lamtor2	3	88457126	88460381	-	3256	-0.232206	4.85922	-1.52058	0.158888	0.980572	-4.40165
ENSMUSG00000091512	Lamtor3	3	137624267	137634661	+	10395	-0.110938	5.59076	-1.51726	0.159713	0.980572	-4.39988
ENSMUSG00000085584	Rtl9	X	141882590	141887293	+	4704	0.449635	3.14354	1.51697	0.159786	0.980572	-4.44167
ENSMUSG00000031431	Tsc22d3	X	139440277	139501408	-	61132	-0.228105	7.04602	-1.5162	0.159978	0.980572	-4.40311
ENSMUSG00000031144	Syp	X	7504710	7519495	+	14786	-0.152901	9.47033	-1.51608	0.160006	0.980572	-4.41442
ENSMUSG00000028851	Nudc	4	133259853	133273307	-	13455	-0.1775	6.53827	-1.51586	0.160061	0.980572	-4.4011
ENSMUSG00000029465	Arpc3	5	122529941	122552247	+	22307	-0.153944	6.4613	-1.51452	0.160398	0.980572	-4.40173
ENSMUSG00000026614	Slc30a10	1	185187045	185200959	+	13915	0.156167	5.32391	1.51355	0.16064	0.980572	-4.40277
ENSMUSG00000057388	Mrpl18	17	13130236	13135232	-	4997	-0.196726	4.69529	-1.51351	0.160651	0.980572	-4.407
ENSMUSG00000035509	Fbxl21	13	56670285	56685711	+	15427	0.271181	3.09268	1.51228	0.160957	0.980572	-4.44238
ENSMUSG00000079487	Med12	X	100317636	100341071	+	23436	0.309893	5.37072	1.51215	0.160989	0.980572	-4.40347
ENSMUSG00000019984	Med23	10	24745884	24789579	+	43696	0.157303	6.25258	1.51213	0.160996	0.980572	-4.40277
ENSMUSG00000061374	Fiz1	7	5010058	5017696	-	7639	-0.13922	4.32365	-1.51152	0.161149	0.980572	-4.41336
ENSMUSG00000034403	Pja1	X	98509340	98514879	-	5540	-0.127505	7.91412	-1.51147	0.161162	0.980572	-4.40959
ENSMUSG00000053550	Shisa7	7	4828551	4847695	-	19145	0.233786	8.88595	1.50991	0.161553	0.980572	-4.41459
ENSMUSG00000034290	Nek9	12	85346288	85386136	-	39849	0.153538	6.4346	1.5091	0.161757	0.980572	-4.40506
ENSMUSG00000107476	Zfp862-ps	6	48481271	48511766	+	30496	0.155758	4.77688	1.50866	0.161868	0.980572	-4.40826
ENSMUSG00000069049	Eif2s3y	Y	1010543	1028847	+	18305	-0.191476	6.07967	-1.50829	0.161961	0.980572	-4.40516
ENSMUSG00000028454	Pigo	4	43017635	43025819	-	8185	0.173909	5.02477	1.50757	0.162143	0.980572	-4.40768
ENSMUSG00000024883	Rin1	19	5100509	5107099	+	6591	0.210253	6.80106	1.50693	0.162304	0.980572	-4.40743
ENSMUSG00000047281	Sfn	4	133327867	133329479	-	1613	-0.275269	1.61182	-1.50556	0.16265	0.980572	-4.49235
ENSMUSG00000030213	Atf7ip	6	136483165	136587860	+	104696	0.163438	6.86461	1.5048	0.162843	0.980572	-4.40908
ENSMUSG00000006241	Ccdc159	9	21838767	21847168	+	8402	0.244022	3.69286	1.50461	0.162892	0.980572	-4.4311
ENSMUSG00000002658	Gtf2f1	17	57310405	57318288	-	7884	-0.19211	5.82086	-1.50279	0.163352	0.980572	-4.40876
ENSMUSG00000029507	Pus1	5	110921533	110928525	-	6993	-0.187001	3.23027	-1.50252	0.163421	0.980572	-4.44412
ENSMUSG00000052889	Prkcb	7	121887974	122233625	+	345652	0.177265	10.4053	1.50039	0.163963	0.980572	-4.42758
ENSMUSG00000022565	Plec	15	76055174	76116774	-	61601	0.236214	7.61061	1.49995	0.164076	0.980572	-4.41504
ENSMUSG00000021573	Tppp	13	74157526	74183872	+	26347	0.175951	8.67346	1.49994	0.164079	0.980572	-4.41907
ENSMUSG00000029641	Rasl11a	5	146781881	146784536	+	2656	-0.228435	1.10873	-1.49971	0.164136	0.980572	-4.50795
ENSMUSG00000100017	2410022M11Rik	14	57049446	57051356	+	1911	0.246773	0.896868	1.49952	0.164184	0.980572	-4.51124
ENSMUSG00000034818	Celf5	10	81295061	81318543	-	23483	0.193359	8.78028	1.49901	0.164314	0.980572	-4.41991
ENSMUSG00000107002	0610012G03Rik	16	31765868	31767312	-	1445	-0.238136	4.59289	-1.49883	0.164362	0.980572	-4.41684
ENSMUSG00000032014	Oaf	9	43132532	43151208	-	18677	-0.221041	3.43016	-1.49855	0.164432	0.980572	-4.44004
ENSMUSG00000006412	Pfdn2	1	171173238	171186822	+	13585	-0.154546	6.00042	-1.49817	0.164531	0.980572	-4.41147
ENSMUSG00000000823	Zfp512b	2	181223896	181234596	-	10701	0.320965	5.59265	1.49812	0.164544	0.980572	-4.41173
ENSMUSG00000117634	Gm50069	18	11788477	11790841	-	2365	-0.327046	0.587115	-1.49801	0.164572	0.980572	-4.51782
ENSMUSG00000048537	Phldb1	9	44597601	44646495	-	48895	0.222386	7.41692	1.49746	0.164711	0.980572	-4.4157
ENSMUSG00000003575	Crtc1	8	70835005	70892229	-	57225	0.194422	8.38863	1.49714	0.164794	0.980572	-4.41944
ENSMUSG00000025439	Clns1a	7	97345841	97370003	+	24163	-0.131578	5.92464	-1.49612	0.165055	0.980572	-4.41273
ENSMUSG00000014355	Anapc1	2	128452024	128529311	-	77288	0.187803	7.11475	1.49589	0.165114	0.980572	-4.41545
ENSMUSG00000039218	Srrm2	17	24009506	24043715	+	34210	0.270973	9.79095	1.49579	0.16514	0.980572	-4.42662
ENSMUSG00000027350	Chgb	2	132623198	132636999	+	13802	-0.19377	7.49333	-1.49567	0.165171	0.980572	-4.41679
ENSMUSG00000033845	Mrpl15	1	4843429	4855962	-	12534	-0.173615	4.69654	-1.49399	0.165601	0.980572	-4.41834
ENSMUSG00000037935	Smarce1	11	99099873	99121843	-	21971	-0.136978	5.75283	-1.49391	0.165621	0.980572	-4.41422
ENSMUSG00000020697	Lig3	11	82671934	82695100	+	23167	0.136842	5.63663	1.49355	0.165715	0.980572	-4.4145
ENSMUSG00000028194	Ddah1	3	145464430	145600032	+	135603	-0.120473	6.98582	-1.49212	0.166083	0.980572	-4.41716
ENSMUSG00000040327	Cul9	17	46811498	46857314	-	45817	0.169649	6.8731	1.49127	0.166302	0.980572	-4.41721
ENSMUSG00000031374		X	72454702	72471991	+	17290	0.336699	3.50684	1.4909	0.166397	0.980572	-4.44247
ENSMUSG00000041889	Shisa4	1	135298795	135302975	-	4181	-0.170018	5.1951	-1.49038	0.166532	0.980572	-4.41739
ENSMUSG00000017802	Retreg3	11	100987148	101010719	-	23572	-0.114778	6.33672	-1.49028	0.166557	0.980572	-4.4165
ENSMUSG00000038780	Smurf1	5	144813305	144902657	-	89353	0.149915	6.27118	1.49025	0.166566	0.980572	-4.41639
ENSMUSG00000032786	Alas1	9	106110654	106125853	-	15200	-0.126424	5.70262	-1.48991	0.166652	0.980572	-4.4167
ENSMUSG00000037852	Cpe	8	65045576	65146088	-	100513	-0.153158	10.6355	-1.48975	0.166695	0.980572	-4.43373
ENSMUSG00000031590	Frg1	8	41850496	41870111	-	19616	-0.151741	4.43643	-1.48831	0.167066	0.980572	-4.42463
ENSMUSG00000034854	Mfsd12	10	81193325	81202059	+	8735	-0.127149	4.54342	-1.48814	0.16711	0.980572	-4.42277
ENSMUSG00000028971	Cort	4	149209491	149211220	-	1730	-0.672179	-0.423784	-1.48782	0.167195	0.980572	-4.53999
ENSMUSG00000069516	Lyz2	10	117113236	117118226	-	4991	-0.376041	3.13761	-1.48745	0.167291	0.980572	-4.45084
ENSMUSG00000030493	Faap24	7	35091577	35096261	-	4685	-0.251196	2.02882	-1.48696	0.167418	0.980572	-4.4846
ENSMUSG00000025092	Hspa12a	19	58784182	58932086	-	147905	0.148524	7.46551	1.48689	0.167436	0.980572	-4.42202
ENSMUSG00000022204	Ngdn	14	55252911	55261594	+	8684	-0.180349	4.3473	-1.48652	0.167532	0.980572	-4.42653
ENSMUSG00000025354	Dnajc14	10	128639931	128655315	+	15385	0.175158	5.39533	1.48632	0.167583	0.980572	-4.41932
ENSMUSG00000071659	Hnrnpul2	19	8797374	8811507	+	14134	0.20903	6.88388	1.48538	0.167828	0.980572	-4.42081
ENSMUSG00000038542	Pcid2	8	13127189	13155459	-	28271	0.16046	5.38828	1.48494	0.167941	0.980572	-4.42012
ENSMUSG00000019897	Ccdc59	10	105676928	105683694	+	6767	-0.155341	4.85605	-1.48446	0.168067	0.980572	-4.42225
ENSMUSG00000002458	Rgs19	2	181330212	181335770	-	5559	-0.159696	4.11881	-1.4844	0.168084	0.980572	-4.43098
ENSMUSG00000041205	Map6d1	16	20052053	20060108	-	8056	0.147756	5.54159	1.48431	0.168106	0.980572	-4.42027
ENSMUSG00000062995	Ica1	6	8630527	8778488	-	147962	0.121593	6.96423	1.48423	0.168128	0.980572	-4.42181
ENSMUSG00000032526	Ss18l2	9	121539395	121542454	+	3060	-0.156478	4.76492	-1.48265	0.168539	0.980572	-4.42402
ENSMUSG00000032487		1	149975782	149983978	+	8197	-0.554376	2.90247	-1.48255	0.168566	0.980572	-4.45723
ENSMUSG00000046352		14	57336057	57342159	-	6103	-0.330774	1.62369	-1.47963	0.169327	0.980572	-4.49612
ENSMUSG00000022450	Ndufa6	15	82234341	82238523	-	4183	-0.177518	6.10715	-1.47918	0.169447	0.980572	-4.42328
ENSMUSG00000026566	Mpzl1	1	165419809	165462107	-	42299	0.125742	5.3342	1.47915	0.169454	0.980572	-4.42373
ENSMUSG00000039840	Epg5	18	77981680	78078228	+	96549	0.264578	6.14046	1.4791	0.169467	0.980572	-4.42325
ENSMUSG00000096883	Shisa8	15	82090369	82097016	-	6648	-0.389795	2.15096	-1.47862	0.169594	0.980572	-4.48193
ENSMUSG00000059920	4930453N24Rik	16	64572114	64591524	-	19411	-0.151746	4.71034	-1.47807	0.169738	0.980572	-4.4268
ENSMUSG00000090266	Mettl23	11	116734104	116745089	+	10986	-0.262966	4.16376	-1.47667	0.170106	0.980572	-4.43451
ENSMUSG00000026944	Abca2	2	25318715	25338552	+	19838	0.227316	8.56893	1.47627	0.170211	0.980572	-4.43149
ENSMUSG00000029657	Hsph1	5	149537752	149559841	-	22090	-0.210173	9.10999	-1.47624	0.170219	0.980572	-4.43349
ENSMUSG00000028128	F3	3	121517186	121528697	+	11512	-0.175224	5.69922	-1.47574	0.170351	0.980572	-4.42545
ENSMUSG00000004895	Prcc	3	87766210	87792915	-	26706	-0.169371	5.46011	-1.47488	0.170576	0.980572	-4.42627
ENSMUSG00000110218	Tincr	17	56858414	56861387	-	2974	-0.287777	2.35889	-1.47468	0.170631	0.980572	-4.4783
ENSMUSG00000030826	Bcat2	7	45219577	45239135	+	19559	-0.144983	4.13384	-1.47405	0.170795	0.980572	-4.43634
ENSMUSG00000093677	Gm20712	15	58652310	58653800	-	1491	-0.233436	1.39364	-1.47325	0.171007	0.980572	-4.50329
ENSMUSG00000050213	Snip1	4	124960465	124967835	+	7371	-0.13378	3.99661	-1.47275	0.171138	0.980572	-4.43912
ENSMUSG00000037872	Ackr1	1	173159453	173161317	-	1865	-0.17371	5.84061	-1.47233	0.171251	0.980572	-4.42749
ENSMUSG00000031706	Rfx1	8	84793463	84823621	+	30159	0.170695	6.17595	1.47212	0.171307	0.980572	-4.42758
ENSMUSG00000070000	Fcho1	8	72161031	72178360	-	17330	0.140226	7.13124	1.47138	0.171501	0.980572	-4.42971
ENSMUSG00000043602	Zfp3	11	70655035	70663754	+	8720	-0.121986	4.34223	-1.47126	0.171535	0.980572	-4.43455
ENSMUSG00000038677	Scube3	17	28361115	28393828	+	32714	0.2107	5.35235	1.47113	0.171567	0.980572	-4.42866
ENSMUSG00000025532	Crcp	5	130058131	130089630	+	31500	-0.111618	5.16302	-1.47052	0.171731	0.980572	-4.42937
ENSMUSG00000025314	Ptprj	2	90260098	90410991	-	150894	0.216176	6.52884	1.4698	0.171922	0.980572	-4.42938
ENSMUSG00000038717	Atp5l	9	44823855	44832040	-	8186	-0.27004	6.39983	-1.46962	0.171968	0.980572	-4.42934
ENSMUSG00000041911	Dlx1	2	71358457	71364325	+	5869	-0.278384	3.86312	-1.46944	0.172016	0.980572	-4.44575
ENSMUSG00000057789	Bak1	17	27238784	27247983	-	9200	-0.161259	3.34367	-1.46936	0.172039	0.980572	-4.45501
ENSMUSG00000100862	Gm10925	1	24653055	24653732	-	678	-0.604345	1.26819	-1.4691	0.172107	0.980572	-4.5064
ENSMUSG00000028385	Snx30	4	59805840	59904737	+	98898	0.191186	5.74542	1.46887	0.172167	0.980572	-4.42964
ENSMUSG00000021140	Pcnx	12	81906797	82047698	+	140902	0.30873	7.38667	1.46828	0.172326	0.980572	-4.43247
ENSMUSG00000030007	Cct7	6	85428496	85445457	+	16962	-0.142419	7.46333	-1.46826	0.172332	0.980572	-4.4326
ENSMUSG00000030890	Ilk	7	105385799	105392132	+	6334	-0.152182	6.27697	-1.46806	0.172384	0.980572	-4.43016
ENSMUSG00000018166	Erbb3	10	128403392	128425521	-	22130	0.243559	4.43935	1.46778	0.172457	0.980572	-4.43507
ENSMUSG00000036104	Rab3gap1	1	127796510	127871605	+	75096	0.118336	7.18148	1.46757	0.172515	0.980572	-4.43223
ENSMUSG00000027222	Pex16	2	92205021	92211562	+	6542	-0.117779	4.32245	-1.46754	0.172522	0.980572	-4.43715
ENSMUSG00000050619	Zscan29	2	120988754	121001606	-	12853	-0.203066	3.1043	-1.46746	0.172544	0.980572	-4.46103
ENSMUSG00000067242	Lgi1	19	38252984	38300662	+	47679	-0.115401	6.79377	-1.46663	0.172765	0.980572	-4.43181
ENSMUSG00000021268	Meg3	12	109506884	109538160	+	31277	0.199828	12.5655	1.46644	0.172815	0.980572	-4.45388
ENSMUSG00000026083	Eif5b	1	38037091	38094660	+	57570	-0.220559	6.43214	-1.46575	0.172999	0.980572	-4.43173
ENSMUSG00000003534	Ddr1	17	35992459	36015513	-	23055	0.136745	6.17815	1.46513	0.173166	0.980572	-4.4319
ENSMUSG00000038537	Mc3r	2	172090412	172093034	+	2623	0.325061	1.52022	1.46498	0.173206	0.980572	-4.50507
ENSMUSG00000020628	Trappc12	12	28740627	28800471	-	59845	0.105895	6.79685	1.46375	0.173533	0.980572	-4.43347
ENSMUSG00000024112	Cacna1h	17	25593259	25652757	-	59499	0.201746	7.26789	1.46295	0.173748	0.980572	-4.43514
ENSMUSG00000052229	Gpr17	18	32076050	32082689	-	6640	0.188533	6.47706	1.4627	0.173815	0.980572	-4.4336
ENSMUSG00000023020	Cox14	15	99623528	99627413	+	3886	-0.215384	5.53649	-1.46141	0.174161	0.980572	-4.4344
ENSMUSG00000017400	Stac2	11	97927449	97944288	-	16840	-0.292387	5.10154	-1.46125	0.174203	0.980572	-4.43503
ENSMUSG00000008305	Tle1	4	72035379	72119156	-	83778	0.115821	6.4232	1.46121	0.174214	0.980572	-4.43441
ENSMUSG00000021270	Hsp90aa1	12	110657039	110669162	-	12124	-0.164395	8.92334	-1.46097	0.174278	0.980572	-4.44081
ENSMUSG00000036078	Sigmar1	4	41738493	41756157	-	17665	-0.116151	4.64415	-1.46039	0.174434	0.980572	-4.43753
ENSMUSG00000053684	BC048403	10	121575842	121588783	+	12942	0.143434	3.62213	1.45991	0.174563	0.980572	-4.45243
ENSMUSG00000049106	Dcaf5	12	80382622	80483375	-	100754	0.113007	6.40107	1.45988	0.174571	0.980572	-4.43523
ENSMUSG00000035469	Rcbtb1	14	59438658	59474714	+	36057	0.177912	6.35367	1.45933	0.174721	0.980572	-4.43555
ENSMUSG00000106317	Gm43848	3	105633217	105634463	-	1247	-0.307737	0.337555	-1.45927	0.174736	0.980572	-4.52899
ENSMUSG00000003269	Cyth2	7	45456061	45464005	-	7945	-0.140479	5.92834	-1.45925	0.174741	0.980572	-4.43552
ENSMUSG00000035284	Vps13c	9	67747678	67902920	+	155243	0.407531	6.93374	1.45844	0.174961	0.980572	-4.43705
ENSMUSG00000027709	Mccc1	3	36013461	36054827	-	41367	0.196795	5.47591	1.45667	0.175436	0.980572	-4.43725
ENSMUSG00000020621	Rdh14	12	10440772	10445562	+	4791	-0.196524	4.83745	-1.45628	0.175544	0.980572	-4.43877
ENSMUSG00000006920	Ezh1	11	101081941	101117289	-	35349	0.103536	6.39374	1.45596	0.175629	0.980572	-4.4376
ENSMUSG00000023830	Igf2r	17	12901293	12988551	-	87259	0.210222	5.83302	1.45576	0.175683	0.980572	-4.43766
ENSMUSG00000037533		11	54413673	54590111	+	176439	0.217637	6.72369	1.45565	0.175713	0.980572	-4.43826
ENSMUSG00000039801	Cplane1	15	8198590	8300642	+	102053	0.233063	6.92454	1.45535	0.175794	0.980572	-4.43877
ENSMUSG00000039824	Myl6b	10	128330026	128334554	-	4529	-0.206185	2.96984	-1.45433	0.176072	0.980572	-4.46931
ENSMUSG00000026158	Ogfrl1	1	23405505	23436853	-	31349	-0.258229	6.79376	-1.4541	0.176132	0.980572	-4.43929
ENSMUSG00000019577	Pdk4	6	5483351	5496309	-	12959	-0.159547	4.68249	-1.45383	0.176207	0.980572	-4.44097
ENSMUSG00000066892	Fbxl12	9	20529414	20556063	-	26650	0.180367	5.06098	1.45339	0.176327	0.980572	-4.43979
ENSMUSG00000037740	Mrps26	2	130405662	130410615	+	4954	-0.212085	5.24672	-1.45126	0.176905	0.980572	-4.44083
ENSMUSG00000031059	Ndufb11	X	20481565	20483858	-	2294	-0.222031	6.14684	-1.45092	0.176996	0.980572	-4.44064
ENSMUSG00000026516	Nvl	1	180914703	180971769	-	57067	0.165302	6.70302	1.45089	0.177006	0.980572	-4.44106
ENSMUSG00000004609	Cd33	7	43173640	43193852	-	20213	0.228442	3.53873	1.45088	0.177007	0.980572	-4.4569
ENSMUSG00000022114	Spry2	14	106129381	106134253	-	4873	-0.26225	5.95001	-1.45079	0.177033	0.980572	-4.44071
ENSMUSG00000015120	Ube2i	17	25480890	25493596	-	12707	0.154048	6.47811	1.45023	0.177186	0.980572	-4.44116
ENSMUSG00000028809	Srrm1	4	135047795	135080632	-	32838	0.140769	7.82742	1.44972	0.177325	0.980572	-4.44407
ENSMUSG00000025375	Aatk	11	119898139	119937993	-	39855	0.172872	8.21694	1.44952	0.177377	0.980572	-4.44502
ENSMUSG00000079242	C730034F03Rik	15	89313792	89315071	+	1280	0.285787	0.538086	1.44928	0.177443	0.980572	-4.52958
ENSMUSG00000032802	Srxn1	2	151947436	151953296	+	5861	-0.155789	6.83238	-1.44903	0.177513	0.980572	-4.44232
ENSMUSG00000085084	4930570G19Rik	3	156252390	156267383	-	14994	0.214154	5.05679	1.44889	0.177549	0.980572	-4.44237
ENSMUSG00000063382	Bcl9l	9	44394122	44423193	+	29072	0.176178	6.51502	1.44873	0.177593	0.980572	-4.4421
ENSMUSG00000017144	Rnd3	2	51020450	51039123	-	18674	-0.172496	3.97844	-1.44773	0.177868	0.980572	-4.4532
ENSMUSG00000037904	Ankrd9	12	110941787	110945474	-	3688	-0.193957	2.35399	-1.44761	0.177901	0.980572	-4.48731
ENSMUSG00000003541	Ier3	17	36132576	36133815	+	1240	-0.366782	2.98839	-1.44654	0.178193	0.980572	-4.47121
ENSMUSG00000062929	Cfl2	12	54905594	54909662	-	4069	-0.229813	5.97263	-1.44649	0.178206	0.980572	-4.44333
ENSMUSG00000031671	Setd6	8	96442509	96445638	+	3130	-0.179855	4.29257	-1.44627	0.178266	0.980572	-4.44873
ENSMUSG00000023944	Hsp90ab1	17	45878701	45884197	-	5497	-0.132927	10.7888	-1.44607	0.178322	0.980572	-4.4553
ENSMUSG00000029516	Cit	5	115983337	116147006	+	163670	0.217251	7.59404	1.44607	0.178322	0.980572	-4.44557
ENSMUSG00000021892	Sh3bp5	14	31081837	31158035	-	76199	-0.117701	5.40236	-1.44582	0.178389	0.980572	-4.44391
ENSMUSG00000086889	Phf2os1	13	49024588	49028936	+	4349	0.202016	3.37217	1.44567	0.17843	0.980572	-4.46417
ENSMUSG00000038564	Ift172	5	31410621	31448460	-	37840	0.15752	6.33552	1.44566	0.178435	0.980572	-4.44387
ENSMUSG00000038827	Abitram	4	56802345	56809601	+	7257	0.140974	5.2168	1.4453	0.178532	0.980572	-4.44434
ENSMUSG00000031683	Lsm6	8	79531494	79547769	-	16276	-0.13204	5.42064	-1.4451	0.178587	0.980572	-4.44433
ENSMUSG00000081058	H3c15	3	96145424	96146443	-	1020	-0.389251	1.01919	-1.44454	0.17874	0.980572	-4.5199
ENSMUSG00000054008	Ndst1	18	60817566	60881722	-	64157	0.178788	7.00203	1.44435	0.178793	0.980572	-4.4454
ENSMUSG00000026519	Tmem63a	1	180769909	180802677	+	32769	0.216952	5.5139	1.4443	0.178807	0.980572	-4.44476
ENSMUSG00000021215		13	3932018	3968220	-	36203	-0.151743	4.93778	-1.44419	0.178837	0.980572	-4.44559
ENSMUSG00000066440	Zfyve26	12	79279120	79343078	-	63959	0.207126	5.34945	1.4441	0.178861	0.980572	-4.44496
ENSMUSG00000042506	Usp22	11	61042611	61065881	-	23271	0.153222	8.0531	1.44347	0.179035	0.980572	-4.44801
ENSMUSG00000075585	6330403L08Rik	5	138980811	138986332	+	5522	0.168466	3.9042	1.44327	0.17909	0.980572	-4.45492
ENSMUSG00000035764	Fbxo45	16	32048930	32065976	-	17047	-0.120741	5.72257	-1.44198	0.179444	0.980572	-4.44611
ENSMUSG00000054452	Tle5	10	81395322	81402196	+	6875	-0.171735	8.43852	-1.4417	0.179521	0.980572	-4.44972
ENSMUSG00000020536	Llgl1	11	60590549	60605012	+	14464	0.129002	6.21531	1.44157	0.179559	0.980572	-4.44635
ENSMUSG00000007721	Ccdc124	8	71320871	71326579	-	5709	-0.226775	5.19952	-1.44146	0.179588	0.980572	-4.44678
ENSMUSG00000018239	Zcchc10	11	53215506	53224128	+	8623	-0.20922	3.12157	-1.44141	0.179603	0.980572	-4.47124
ENSMUSG00000041548	Hspb8	5	116546550	116560923	-	14374	-0.21614	4.04379	-1.44076	0.179782	0.980572	-4.45416
ENSMUSG00000030432	Rpl28	7	4795873	4798065	+	2193	-0.256094	6.56117	-1.44022	0.17993	0.980572	-4.4473
ENSMUSG00000031385	Plxnb3	X	72800696	72816120	+	15425	0.273932	5.49036	1.43956	0.180114	0.980572	-4.44764
ENSMUSG00000035642	Aamdc	7	97199538	97228704	-	29167	-0.164323	4.42963	-1.43939	0.18016	0.980572	-4.45095
ENSMUSG00000022354	Ndufb9	15	58805605	58811337	+	5733	-0.255877	5.78959	-1.4388	0.180324	0.980572	-4.44805
ENSMUSG00000003402	Prkcsh	9	21914102	21925518	+	11417	-0.128329	6.54917	-1.43858	0.180384	0.980572	-4.44826
ENSMUSG00000097729	2310015A10Rik	12	80167320	80179618	-	12299	0.198034	3.65168	1.4385	0.180404	0.980572	-4.46145
ENSMUSG00000026311	Asb1	1	91468266	91487311	+	19046	0.115324	5.55141	1.43841	0.180432	0.980572	-4.44832
ENSMUSG00000000247	Lhx2	2	38229293	38259745	+	30453	-0.166996	4.83636	-1.43785	0.180587	0.980572	-4.44947
ENSMUSG00000073557	Ppp1r12b	1	134682396	134883680	-	201285	0.194205	7.72249	1.43751	0.18068	0.980572	-4.45071
ENSMUSG00000030521	Mphosph10	7	64026275	64042016	-	15742	-0.153873	3.81705	-1.43728	0.180744	0.980572	-4.45981
ENSMUSG00000041115	Iqsec2	X	150927264	151008232	+	80969	0.17915	7.43798	1.43702	0.180815	0.980572	-4.45036
ENSMUSG00000020514	Mrpl22	11	58062487	58070391	+	7905	-0.169796	3.86185	-1.43562	0.181204	0.980572	-4.46
ENSMUSG00000020801	Med31	11	72102550	72106418	-	3869	-0.187028	3.43131	-1.43548	0.181244	0.980572	-4.46713
ENSMUSG00000006517	Mvd	8	123160340	123170161	-	9822	-0.240185	3.64736	-1.43494	0.181394	0.980572	-4.4636
ENSMUSG00000006736	Tspan31	10	126903149	126906133	-	2985	-0.131345	5.94435	-1.43469	0.181461	0.980572	-4.45054
ENSMUSG00000019471	Cdc37	9	21044518	21061278	-	16761	-0.164899	6.73166	-1.43453	0.181508	0.980572	-4.4508
ENSMUSG00000032612	Usp4	9	108225052	108269744	+	44693	0.126671	7.37414	1.43447	0.181524	0.980572	-4.45171
ENSMUSG00000112332	4930466K18Rik	10	53490465	53491370	+	906	-0.276763	1.46501	-1.43447	0.181525	0.980572	-4.51119
ENSMUSG00000051111	Sv2c	13	96091102	96269085	-	177984	0.17754	8.20954	1.43399	0.181656	0.980572	-4.45355
ENSMUSG00000064247	Plcxd1	5	110247835	110253819	+	5985	0.148258	4.91216	1.43334	0.181838	0.980572	-4.45198
ENSMUSG00000030061	Uba3	6	97160631	97182608	-	21978	-0.134777	6.22635	-1.43325	0.181864	0.980572	-4.45142
ENSMUSG00000032898	Fbxo21	5	118114795	118148266	+	33472	0.109402	7.35465	1.43299	0.181936	0.980572	-4.45252
ENSMUSG00000016833	Mrps18c	5	100946493	100952337	+	5845	-0.304049	3.51016	-1.4321	0.182183	0.980572	-4.46753
ENSMUSG00000037072	Selenof	3	144276065	144303441	+	27377	-0.195485	6.97576	-1.43208	0.182189	0.980572	-4.45253
ENSMUSG00000059689	Zfp637	6	117818141	117822917	+	4777	-0.206833	4.5988	-1.43143	0.182372	0.980572	-4.4543
ENSMUSG00000046201	Scaf8	17	3165247	3249134	+	83888	0.177377	6.05035	1.43114	0.182451	0.980572	-4.4527
ENSMUSG00000022899	Slc15a2	16	36570539	36605324	-	34786	0.295348	4.67088	1.43096	0.182503	0.980572	-4.45408
ENSMUSG00000061762	Tac1	6	7554879	7565834	+	10956	-0.408149	8.24373	-1.43081	0.182545	0.980572	-4.45539
ENSMUSG00000044340	Phlpp1	1	106099482	106321980	+	222499	0.169724	7.13273	1.4304	0.182658	0.980572	-4.4537
ENSMUSG00000047260	Emc6	11	73066345	73067863	-	1519	-0.177325	4.73047	-1.43025	0.1827	0.980572	-4.45431
ENSMUSG00000096687	Mfsd4b4	10	39766009	39775234	-	9226	0.126417	4.38889	1.43015	0.182729	0.980572	-4.45603
ENSMUSG00000050002	Idnk	13	58305463	58312507	+	7045	-0.117907	3.76046	-1.43003	0.182762	0.980572	-4.46384
ENSMUSG00000055371	Stam2	2	52581676	52632293	-	50618	0.114286	5.23968	1.42973	0.182846	0.980572	-4.45362
ENSMUSG00000047205	Dusp18	11	3845240	3851296	+	6057	0.134658	5.35551	1.42973	0.182848	0.980572	-4.4536
ENSMUSG00000091003	Gm7244	9	31186117	31186571	+	455	0.512672	-0.268177	1.42854	0.183181	0.980572	-4.54771
ENSMUSG00000039463	Slc9a8	2	167263632	167318920	+	55289	0.146866	5.47672	1.42815	0.18329	0.980572	-4.45453
ENSMUSG00000117864	Gm19500	18	57538487	57549222	+	10736	0.39161	2.86163	1.42788	0.183365	0.980572	-4.48151
ENSMUSG00000001323	Srr	11	74797185	74816774	-	19590	0.179878	6.74476	1.42769	0.183419	0.980572	-4.45489
ENSMUSG00000075318	Scn2a	2	65451115	65597791	+	146677	0.173171	8.31878	1.42721	0.183553	0.980572	-4.45737
ENSMUSG00000051343	Rab11fip5	6	85311944	85351616	-	39673	0.148755	6.25238	1.42699	0.183614	0.980572	-4.45522
ENSMUSG00000028673	Fuca1	4	135648046	135667622	+	19577	-0.159917	4.81807	-1.42692	0.183634	0.980572	-4.45582
ENSMUSG00000042308	Setd1a	7	127375842	127399294	+	23453	0.360431	4.39494	1.4269	0.18364	0.980572	-4.45776
ENSMUSG00000025510	Cd151	7	141047305	141051386	+	4082	-0.133738	4.18333	-1.42689	0.183643	0.980572	-4.45978
ENSMUSG00000042404	Dennd4b	3	90172492	90187976	+	15485	0.151631	6.02775	1.42653	0.183743	0.980572	-4.45551
ENSMUSG00000015672	Mrpl32	13	14782769	14787750	-	4982	-0.172776	4.08376	-1.42571	0.183976	0.980572	-4.46166
ENSMUSG00000115099	1700087I21Rik	14	103662341	103687303	+	24963	0.16014	4.39349	1.42469	0.184261	0.980572	-4.45908
ENSMUSG00000001062	Vps9d1	8	123969095	123981087	-	11993	0.108089	5.97888	1.42411	0.184426	0.980572	-4.45698
ENSMUSG00000008301	Phax	18	56695515	56720784	+	25270	-0.137498	5.22953	-1.4239	0.184484	0.980572	-4.45714
ENSMUSG00000020232	Hmg20b	10	81181882	81186314	-	4433	-0.181913	3.64946	-1.4239	0.184485	0.980572	-4.46877
ENSMUSG00000035311	Gnptab	10	88214994	88283191	+	68198	0.142143	6.50223	1.42353	0.184589	0.980572	-4.45731
ENSMUSG00000056459	Zbtb25	12	76394556	76416376	-	21821	0.1251	4.20848	1.42236	0.18492	0.980572	-4.46165
ENSMUSG00000037259	Dzank1	2	144312477	144369334	-	56858	0.169303	8.71075	1.42205	0.185007	0.980572	-4.46087
ENSMUSG00000057672	Pkn1	8	84393165	84425808	-	32644	0.129811	6.54224	1.42203	0.185012	0.980572	-4.45821
ENSMUSG00000021013	Ttc8	12	98886833	98949497	+	62665	0.238911	6.48184	1.42172	0.185099	0.980572	-4.45839
ENSMUSG00000028982	Slc25a33	4	149828493	149858734	-	30242	-0.183346	5.30557	-1.42138	0.185197	0.980572	-4.4586
ENSMUSG00000029918	Mrps33	6	39778738	39787922	-	9185	-0.173372	4.75247	-1.42074	0.185379	0.980572	-4.45956
ENSMUSG00000056305	Usp39	6	72295661	72322167	-	26507	-0.107542	5.12698	-1.42073	0.18538	0.980572	-4.45902
ENSMUSG00000036615	Rfxap	3	54710536	54715212	-	4677	-0.161736	4.62044	-1.42065	0.185403	0.980572	-4.46004
ENSMUSG00000097305	Gm17276	17	32332385	32360817	+	28433	0.189387	6.23724	1.42023	0.185523	0.980572	-4.45934
ENSMUSG00000020635	Fkbp1b	12	4883174	4891591	-	8418	-0.251089	2.72519	-1.42005	0.185572	0.980572	-4.48692
ENSMUSG00000029810	Tmem176b	6	48810752	48818430	-	7679	-0.170927	4.7895	-1.41954	0.185717	0.980572	-4.46014
ENSMUSG00000038351	Sgsm2	11	74740087	74787886	-	47800	0.10997	7.39717	1.41938	0.185762	0.980572	-4.46028
ENSMUSG00000059498	Fcgr3	1	170878743	170892504	-	13762	-0.224638	3.70909	-1.41856	0.185996	0.980572	-4.46959
ENSMUSG00000028862		4	132968129	132980240	+	12112	-0.385327	2.68902	-1.41817	0.186107	0.980572	-4.48914
ENSMUSG00000038425	Poli	18	70641751	70663691	-	21941	0.151982	4.1381	1.41796	0.186166	0.980572	-4.46484
ENSMUSG00000047459	Dynlrb1	2	155078453	155092197	+	13745	-0.176554	6.61609	-1.41792	0.186179	0.980572	-4.46067
ENSMUSG00000020841	Cpd	11	76669250	76737844	-	68595	0.158851	6.72548	1.41723	0.186375	0.980572	-4.46108
ENSMUSG00000020196	Cabin1	10	75481946	75600175	-	118230	0.167459	7.2889	1.41599	0.186726	0.980572	-4.46212
ENSMUSG00000021091	Serpina3n	12	104372988	104380588	+	7601	-0.571539	3.35311	-1.41584	0.186771	0.980572	-4.47675
ENSMUSG00000043448	Gjc2	11	59066394	59074039	-	7646	0.168633	4.18734	1.41583	0.186773	0.980572	-4.46549
ENSMUSG00000004285	Atp6v1f	6	29467717	29470511	+	2795	-0.20849	5.95903	-1.41577	0.186789	0.980572	-4.46202
ENSMUSG00000024190		17	26724564	26781102	-	56539	-0.241929	5.10561	-1.41573	0.186802	0.980572	-4.46201
ENSMUSG00000067879	Vxn	1	9671424	9697368	+	25945	-0.481477	5.06776	-1.41535	0.186909	0.980572	-4.46223
ENSMUSG00000015126	Tsr3	17	25459144	25461772	+	2629	-0.202279	4.4933	-1.41532	0.186917	0.980572	-4.46364
ENSMUSG00000027808	Serp1	3	58427238	58433313	-	6076	-0.180505	5.40239	-1.41487	0.187045	0.980572	-4.46249
ENSMUSG00000033444	Specc1l	10	75047905	75148577	+	100673	0.142775	6.59589	1.41422	0.187233	0.980572	-4.46287
ENSMUSG00000027864		3	100947548	101017594	-	70047	0.142299	5.25327	1.41383	0.187343	0.980572	-4.46309
ENSMUSG00000024997	Prdx3	19	60852489	60862994	-	10506	-0.126442	5.97843	-1.41351	0.187434	0.980572	-4.4634
ENSMUSG00000002825	Qtrt1	9	21323133	21331570	+	8438	-0.125603	4.54504	-1.41341	0.187463	0.980572	-4.46436
ENSMUSG00000042211	Fbxo38	18	62637226	62681766	-	44541	0.10863	6.30038	1.41328	0.1875	0.980572	-4.46352
ENSMUSG00000093460	Six3os1	17	85908079	85925826	-	17748	0.141435	5.00476	1.41297	0.187591	0.980572	-4.46362
ENSMUSG00000026634	Angel2	1	190657309	190679159	+	21851	0.103572	6.40693	1.41291	0.187607	0.980572	-4.46372
ENSMUSG00000070697	Utp3	5	88702321	88703949	+	1629	-0.170247	4.69033	-1.41285	0.187624	0.980572	-4.46424
ENSMUSG00000103451	Gm33973	1	183295709	183296242	+	534	-0.51324	-0.700448	-1.41271	0.187663	0.980572	-4.55345
ENSMUSG00000117286		5	37242714	37386891	+	144178	0.416115	6.90126	1.4126	0.187695	0.980572	-4.46384
ENSMUSG00000039262	Prrc2b	2	32041094	32124549	+	83456	0.227343	9.38429	1.41254	0.187713	0.980572	-4.46729
ENSMUSG00000028099	Polr3c	3	96618806	96634944	-	16139	-0.11292	4.33715	-1.41178	0.187931	0.980572	-4.46626
ENSMUSG00000042185	Nfrkb	9	31297488	31332629	+	35142	0.177052	5.79713	1.41109	0.188129	0.980572	-4.46486
ENSMUSG00000049999	Ppp1r3d	2	178052999	178056265	-	3267	-0.163639	3.41193	-1.41086	0.188193	0.980572	-4.47809
ENSMUSG00000059864	Olfr1393	11	49169131	49173596	+	4466	0.225059	3.38333	1.41025	0.18837	0.980572	-4.47938
ENSMUSG00000074664	A830092H15Rik	3	26385299	26387526	+	2228	0.311805	2.4224	1.40996	0.188452	0.980572	-4.49667
ENSMUSG00000057278	Snrpg	6	86348286	86356310	+	8025	-0.215705	4.33337	-1.40892	0.188751	0.980572	-4.46815
ENSMUSG00000071649	B3gat3	19	8897738	8904600	+	6863	-0.142583	6.22974	-1.40891	0.188754	0.980572	-4.46615
ENSMUSG00000075467	Dnlz	2	26238133	26242122	-	3990	-0.177909	5.37656	-1.40867	0.188823	0.980572	-4.46617
ENSMUSG00000020661	Dnmt3a	12	3856007	3964443	+	108437	0.204691	7.50237	1.40855	0.188857	0.980572	-4.46653
ENSMUSG00000027829	Ccnl1	3	65853572	65865670	-	12099	-0.139227	6.42647	-1.40814	0.188976	0.980572	-4.46655
ENSMUSG00000041598	Cdc42ep4	11	113617676	113642707	-	25032	-0.149132	4.99623	-1.40746	0.189172	0.980572	-4.46683
ENSMUSG00000041161	Otud3	4	138622690	138641256	-	18567	0.276457	3.58708	1.40684	0.18935	0.980572	-4.47715
ENSMUSG00000019916	P4ha1	10	59159118	59209126	+	50009	-0.129977	6.43003	-1.40682	0.189355	0.980572	-4.46735
ENSMUSG00000047749	Zc3hav1l	6	38264331	38276194	-	11864	0.190857	3.54023	1.40657	0.189427	0.980572	-4.4778
ENSMUSG00000033214	Slitrk5	14	111912529	111920573	+	8045	0.1229	6.16607	1.40562	0.189703	0.980572	-4.46818
ENSMUSG00000022023	Wbp4	14	79697377	79718960	-	21584	-0.116392	5.94562	-1.40553	0.189728	0.980572	-4.46824
ENSMUSG00000033857	Engase	11	118367655	118380035	+	12381	0.144119	3.50177	1.40509	0.189856	0.980572	-4.47932
ENSMUSG00000018547	Pip4k2b	11	97605983	97635530	-	29548	0.121291	7.44325	1.40479	0.189943	0.980572	-4.46857
ENSMUSG00000050121	Opalin	19	41050149	41065552	-	15404	0.309294	4.44948	1.40394	0.190187	0.980572	-4.47005
ENSMUSG00000036151		8	70525574	70532716	+	7143	-0.206808	3.07946	-1.40385	0.190213	0.980572	-4.48728
ENSMUSG00000049760	Micos13	17	56914452	56916771	-	2320	-0.230917	5.10368	-1.40212	0.190714	0.980572	-4.46993
ENSMUSG00000056962	Jmjd6	11	116728258	116734275	-	6018	-0.13076	5.16079	-1.40207	0.19073	0.980572	-4.46999
ENSMUSG00000074968	Ano3	2	110485546	110781268	-	295723	0.178046	8.05628	1.4019	0.19078	0.980572	-4.47069
ENSMUSG00000042439	Zfp532	18	65712983	65822514	+	109532	0.152866	6.21949	1.40187	0.190788	0.980572	-4.47044
ENSMUSG00000028889	Yrdc	4	124744472	124749035	+	4564	-0.173523	4.30451	-1.40177	0.190816	0.980572	-4.47168
ENSMUSG00000078813	Leng1	7	3663097	3668839	-	5743	-0.196272	2.94062	-1.40099	0.191043	0.980572	-4.49093
ENSMUSG00000033066	Gas7	11	67345917	67575800	+	229884	0.317296	7.81184	1.3997	0.191418	0.980572	-4.47169
ENSMUSG00000000088	Cox5a	9	57428557	57439709	+	11153	-0.206888	6.92366	-1.39951	0.191475	0.980572	-4.47144
ENSMUSG00000027746	Ufm1	3	53760797	53771251	-	10455	-0.140936	5.4679	-1.39859	0.191743	0.980572	-4.47224
ENSMUSG00000048997	Atxn7l2	3	108109538	108118250	-	8713	0.149126	4.62358	1.39858	0.191743	0.980572	-4.47222
ENSMUSG00000044364	Tmem74b	2	151543928	151554077	+	10150	0.220693	3.05083	1.39803	0.191904	0.980572	-4.48876
ENSMUSG00000036817	Sun1	5	139186392	139235595	+	49204	0.125338	7.18409	1.39753	0.19205	0.980572	-4.47256
ENSMUSG00000039450	Dcxr	11	120616225	120618107	-	1883	-0.256581	1.65575	-1.39717	0.192155	0.980572	-4.51753
ENSMUSG00000020805	Slc13a5	11	72132815	72158048	-	25234	-0.1274	3.96316	-1.39712	0.192169	0.980572	-4.47656
ENSMUSG00000063952	Brpf3	17	29020064	29058923	+	38860	0.162244	6.05969	1.39662	0.192316	0.980572	-4.47363
ENSMUSG00000059518	Znhit1	5	137011018	137016875	-	5858	-0.195528	5.34138	-1.39566	0.192598	0.980572	-4.47383
ENSMUSG00000039741	Bahcc1	11	120123773	120183122	+	59350	0.257073	5.37791	1.39553	0.192636	0.980572	-4.47398
ENSMUSG00000032131	Abcg4	9	44184485	44199912	-	15428	0.171306	6.38184	1.3953	0.192703	0.980572	-4.47428
ENSMUSG00000015748	Prpf3	3	95737436	95763197	-	25762	-0.0997065	5.30602	-1.39521	0.19273	0.980572	-4.47411
ENSMUSG00000051652	Lrrc3	10	77733409	77738370	-	4962	0.15085	3.60729	1.39479	0.192852	0.980572	-4.48176
ENSMUSG00000037362	Ccn3	15	54609098	54617435	+	8338	-0.665518	2.18353	-1.39474	0.192867	0.980572	-4.50626
ENSMUSG00000037747	Phyhipl	10	70393512	70491795	-	98284	-0.113359	7.28648	-1.39464	0.192895	0.980572	-4.47421
ENSMUSG00000023973	Cnpy3	17	47046631	47063140	-	16510	-0.135457	5.58666	-1.39361	0.193198	0.980572	-4.47524
ENSMUSG00000028688	Toe1	4	116651507	116664837	-	13331	-0.157286	3.58215	-1.39296	0.19339	0.980572	-4.48343
ENSMUSG00000061313	Ddhd2	8	26215373	26244624	-	29252	0.127328	6.30231	1.39225	0.193596	0.980572	-4.47617
ENSMUSG00000037395	Rcor3	1	191782846	191822359	-	39514	0.18037	4.75435	1.39213	0.193634	0.980572	-4.47563
ENSMUSG00000005575	Ube2m	7	12769047	12772202	-	3156	-0.139852	6.57787	-1.39188	0.193705	0.980572	-4.47615
ENSMUSG00000061207	Stk19	17	35042969	35055921	-	12953	0.107287	5.86907	1.39173	0.193749	0.980572	-4.47652
ENSMUSG00000061603	Akap6	12	52746166	53202382	+	456217	0.182414	8.17176	1.39169	0.193762	0.980572	-4.4763
ENSMUSG00000023832	Acat2	17	13161777	13179634	-	17858	-0.14432	5.02591	-1.39129	0.193879	0.980572	-4.47622
ENSMUSG00000030538	Cib1	7	79876895	79882561	-	5667	-0.200466	3.1357	-1.39014	0.194219	0.980572	-4.49151
ENSMUSG00000078908	Mon1b	8	114362219	114371811	+	9593	0.255984	4.41539	1.38994	0.194277	0.980572	-4.47729
ENSMUSG00000025277	Abhd6	14	14413010	14466871	-	53862	-0.101931	5.67761	-1.38988	0.194295	0.980572	-4.47757
ENSMUSG00000105858	2310074N15Rik	5	24652906	24653487	+	582	-0.359469	-0.801131	-1.38956	0.194388	0.980572	-4.55739
ENSMUSG00000022136	Dnajc3	14	119175388	119219109	+	43722	-0.19163	6.2013	-1.38954	0.194394	0.980572	-4.47781
ENSMUSG00000102533	Gm37226	9	88564985	88568239	-	3255	0.207335	2.18023	1.38916	0.194506	0.980572	-4.50899
ENSMUSG00000029104	Htt	5	34919084	35069878	+	150795	0.442811	7.08522	1.38907	0.194533	0.980572	-4.47738
ENSMUSG00000097915	A330009N23Rik	15	101119076	101123067	-	3992	-0.294187	2.82913	-1.38888	0.194589	0.980572	-4.49664
ENSMUSG00000056724	Nbeal2	9	110453857	110483229	-	29373	0.262953	5.02924	1.3879	0.194878	0.980572	-4.47817
ENSMUSG00000049232	Tigd2	6	59185855	59189018	+	3164	-0.173467	3.79001	-1.38777	0.194918	0.980572	-4.48308
ENSMUSG00000021054	Sgpp1	12	75761023	75782503	-	21481	-0.153546	5.61051	-1.38763	0.194959	0.980572	-4.47888
ENSMUSG00000027845	Dclre1b	3	103707921	103716760	-	8840	0.178853	3.27278	1.38725	0.195072	0.980572	-4.49023
ENSMUSG00000028470	Hint2	4	43654227	43656466	-	2240	-0.26814	3.21397	-1.38721	0.195084	0.980572	-4.49148
ENSMUSG00000036931		7	30121157	30128171	+	7015	-0.188525	2.61603	-1.38719	0.195088	0.980572	-4.50203
ENSMUSG00000021198	Unc79	12	102915118	103150324	+	235207	0.218563	7.49173	1.38632	0.195347	0.980572	-4.47891
ENSMUSG00000073680	Tmem88b	4	155866048	155870331	-	4284	0.212138	5.90993	1.3863	0.195352	0.980572	-4.4798
ENSMUSG00000031028	Tub	7	108549545	108633667	+	84123	0.189647	7.91707	1.38595	0.195456	0.980572	-4.47924
ENSMUSG00000052456	Get3	8	85744560	85751910	-	7351	-0.128196	6.03195	-1.38421	0.195972	0.980572	-4.48104
ENSMUSG00000091712	Sec14l5	16	4964973	5005135	+	40163	0.230337	5.75503	1.38405	0.196021	0.980572	-4.4811
ENSMUSG00000038267	Slc22a23	13	34363141	34529165	-	166025	0.165635	7.05436	1.38358	0.19616	0.980572	-4.48055
ENSMUSG00000028609	Magoh	4	107736952	107744621	+	7670	-0.1884	3.95449	-1.3835	0.196181	0.980572	-4.48344
ENSMUSG00000038084	Opa1	16	29398152	29473702	+	75551	0.125217	7.69692	1.38343	0.196205	0.980572	-4.48054
ENSMUSG00000029642	Polr1d	5	147013860	147048407	+	34548	-0.173725	4.93958	-1.38297	0.196339	0.980572	-4.48087
ENSMUSG00000060935	Tmem263	10	84938491	84956482	+	17992	-0.187784	5.97794	-1.38286	0.196372	0.980572	-4.48186
ENSMUSG00000027340	Slc23a2	2	131894416	131987028	-	92613	0.196071	7.27063	1.38275	0.196404	0.980572	-4.48091
ENSMUSG00000068134	Zfp120	2	149956326	149978628	-	22303	-0.1937	4.48127	-1.3826	0.196452	0.980572	-4.48107
ENSMUSG00000021716		13	104928992	104975782	+	46791	-0.150118	4.86654	-1.38177	0.196697	0.980572	-4.48156
ENSMUSG00000023044	Csad	15	102085434	102113159	-	27726	0.136923	5.4998	1.38174	0.196707	0.980572	-4.48228
ENSMUSG00000028647	Mycbp	4	123798625	123806062	+	7438	-0.176107	2.52101	-1.38145	0.196793	0.980572	-4.50418
ENSMUSG00000026812	Tsc1	2	28531240	28581179	+	49940	0.186111	7.05154	1.38125	0.196852	0.980572	-4.48188
ENSMUSG00000018293	Pfn1	11	70542676	70545470	-	2795	-0.159425	6.24066	-1.38088	0.196961	0.980572	-4.48295
ENSMUSG00000029434	Vps33a	5	123666722	123711101	-	44380	0.135458	6.95137	1.38041	0.197101	0.980572	-4.48244
ENSMUSG00000037348	Paqr7	4	134224008	134237546	+	13539	-0.133283	5.63622	-1.38038	0.197111	0.980572	-4.48318
ENSMUSG00000040010	Slc7a5	8	122607889	122634433	-	26545	0.111092	5.60747	1.38014	0.197183	0.980572	-4.4833
ENSMUSG00000024097	Srsf7	17	80507509	80514736	-	7228	-0.153597	7.52801	-1.37992	0.197248	0.980572	-4.48245
ENSMUSG00000051427	Ccdc157	11	4091123	4110293	-	19171	0.199133	5.28169	1.37962	0.197337	0.980572	-4.48328
ENSMUSG00000022350	Washc5	15	59203846	59246016	-	42171	0.134045	5.76423	1.37877	0.197592	0.980572	-4.48424
ENSMUSG00000097406	Gm26833	6	39848466	39848905	-	440	0.649182	-1.67908	1.37862	0.197639	0.980572	-4.5673
ENSMUSG00000034292	Traf3ip1	1	91422369	91457029	+	34661	0.136088	4.88327	1.37811	0.197791	0.980572	-4.48366
ENSMUSG00000031949	Adat1	8	112693540	112718934	-	25395	0.109114	4.57641	1.37774	0.197901	0.980572	-4.48367
ENSMUSG00000031939	Taf1d	9	15217510	15228287	+	10778	-0.136761	4.55791	-1.37767	0.197923	0.980572	-4.4837
ENSMUSG00000031010	Usp9x	X	12937737	13039567	+	101831	0.440782	7.54508	1.37753	0.197964	0.980572	-4.48377
ENSMUSG00000023367	Tmem176a	6	48817853	48824005	+	6153	-0.128091	3.91071	-1.37663	0.198234	0.980572	-4.48698
ENSMUSG00000019872	Smpdl3a	10	57670431	57687926	+	17496	-0.134471	4.86554	-1.37616	0.198375	0.980572	-4.48471
ENSMUSG00000033615	Cplx1	5	108666420	108697890	-	31471	-0.186351	8.70254	-1.37598	0.198427	0.980572	-4.48501
ENSMUSG00000038970	Lmtk2	5	144037254	144125022	+	87769	0.224974	7.61979	1.37585	0.198468	0.980572	-4.48469
ENSMUSG00000071662	Polr2g	19	8770491	8775941	-	5451	-0.181716	5.79987	-1.37529	0.198636	0.980572	-4.48628
ENSMUSG00000030376	Slc8a2	7	15863751	15894988	+	31238	0.147557	8.20375	1.37524	0.198651	0.980572	-4.48511
ENSMUSG00000023764		11	3081850	3143463	-	61614	0.120115	5.25953	1.3752	0.198661	0.980572	-4.48583
ENSMUSG00000020629	Adi1	12	28725230	28732174	+	6945	-0.132721	5.05688	-1.37518	0.198667	0.980572	-4.48558
ENSMUSG00000071014	Ndufb6	4	40270591	40279421	-	8831	-0.196826	5.46324	-1.37479	0.198786	0.980572	-4.48631
ENSMUSG00000039637	Coro7	16	4443997	4497641	-	53645	0.151238	7.26184	1.37464	0.198831	0.980572	-4.48548
ENSMUSG00000003198	Zfp959	17	56199093	56205928	+	6836	-0.197555	3.45667	-1.37461	0.198839	0.980572	-4.49222
ENSMUSG00000041671	Pyroxd1	6	142291380	142308983	+	17604	0.131426	4.20827	1.37459	0.198845	0.980572	-4.48622
ENSMUSG00000044881	Coa4	7	100186278	100189576	+	3299	-0.263788	1.21914	-1.37399	0.199026	0.980572	-4.53091
ENSMUSG00000030588	Yif1b	7	28937754	28947022	+	9269	-0.157822	4.30581	-1.37375	0.199099	0.980572	-4.4864
ENSMUSG00000038664	Herc1	9	66257732	66416057	+	158326	0.231151	8.18096	1.37282	0.199379	0.980572	-4.4864
ENSMUSG00000085207	Gm11767	11	119826629	119833524	-	6896	0.280746	4.97438	1.37225	0.199551	0.980572	-4.48715
ENSMUSG00000036916	Zfp280c	X	47630502	47683381	-	52880	0.224161	5.70699	1.37215	0.199581	0.980572	-4.48817
ENSMUSG00000034949	Zfr2	10	81068989	81087957	+	18969	0.130294	6.07738	1.37203	0.199617	0.980572	-4.48833
ENSMUSG00000034000	Neu4	1	93948173	93956056	+	7884	0.138867	3.87668	1.37173	0.199706	0.980572	-4.48955
ENSMUSG00000025759	Mfsd8	3	40772538	40801321	-	28784	0.120907	5.18916	1.37012	0.200192	0.980572	-4.48874
ENSMUSG00000085586	Gm11613	11	97535010	97551193	-	16184	0.173924	4.27696	1.36974	0.200308	0.980572	-4.48842
ENSMUSG00000029001	Fbxo44	4	148237257	148244939	-	7683	-0.106481	6.45162	-1.36969	0.200323	0.980572	-4.48938
ENSMUSG00000032547		9	102712116	102785504	+	73389	-0.103658	5.51262	-1.36848	0.20069	0.980572	-4.49013
ENSMUSG00000035064	Eef2k	7	120442054	120506673	+	64620	0.137703	5.42672	1.36847	0.200691	0.980572	-4.49001
ENSMUSG00000024261	Syt4	18	31570861	31580459	-	9599	-0.158007	7.86	-1.36837	0.200721	0.980572	-4.48875
ENSMUSG00000057265		12	84455845	84489661	+	33817	0.194209	5.06853	1.36787	0.200873	0.980572	-4.48985
ENSMUSG00000035559	Mpv17l2	8	71211295	71213592	-	2298	-0.190372	3.17557	-1.36787	0.200874	0.980572	-4.49947
ENSMUSG00000024889	Rce1	19	4672619	4675669	-	3051	-0.190315	4.59327	-1.36682	0.201192	0.980572	-4.48959
ENSMUSG00000071176	Arhgef10	8	14961663	15051085	+	89423	0.252062	6.10048	1.36667	0.201238	0.980572	-4.49154
ENSMUSG00000025260	Hsd17b10	X	150784841	150787438	+	2598	-0.202451	4.76098	-1.36657	0.201268	0.980572	-4.48985
ENSMUSG00000024213	Nudt3	17	27798356	27842469	-	44114	-0.176808	7.25418	-1.36653	0.201281	0.980572	-4.49005
ENSMUSG00000025656	Arhgef9	X	94092541	94240462	-	147922	0.134073	9.25168	1.36558	0.201569	0.980572	-4.49078
ENSMUSG00000020190	Mknk2	10	80501161	80513946	-	12786	-0.128869	5.80846	-1.36497	0.201754	0.980572	-4.49246
ENSMUSG00000079442	St6galnac4	2	32477107	32489710	+	12604	-0.115758	4.86205	-1.36436	0.201941	0.980572	-4.4914
ENSMUSG00000039474	Wfs1	5	37123448	37146549	-	23102	0.177703	9.70081	1.36316	0.202306	0.980572	-4.49247
ENSMUSG00000038042	Ptpdc1	13	48731348	48779140	-	47793	0.237567	5.99973	1.36293	0.202376	0.980572	-4.49376
ENSMUSG00000060206	Zfp462	4	54945048	55083563	+	138516	0.232366	6.66294	1.36283	0.202407	0.980572	-4.49303
ENSMUSG00000051855	Mest	6	30723546	30748464	+	24919	-0.143232	5.58166	-1.36272	0.20244	0.980572	-4.49362
ENSMUSG00000020747	Tmem94	11	115656259	115690192	+	33934	0.142744	6.92623	1.36193	0.202682	0.980572	-4.49313
ENSMUSG00000044037	Als2cl	9	110708938	110729598	+	20661	0.222749	3.82239	1.36187	0.202698	0.980572	-4.49452
ENSMUSG00000027239	Mdk	2	91760150	91762642	-	2493	-0.282238	3.08215	-1.36186	0.202702	0.980572	-4.50341
ENSMUSG00000000627	Sema4f	6	82888866	82916750	-	27885	0.119809	5.57589	1.36138	0.202848	0.980572	-4.49439
ENSMUSG00000040234	Tm7sf3	6	146503850	146544322	-	40473	0.103301	6.05205	1.36081	0.203023	0.980572	-4.49504
ENSMUSG00000092035	Peg10	6	4747306	4760517	+	13212	0.416308	8.48866	1.36072	0.20305	0.980572	-4.49285
ENSMUSG00000036905	C1qb	4	136607440	136613498	-	6059	-0.163011	5.63014	-1.36072	0.203051	0.980572	-4.49482
ENSMUSG00000025964	Adam23	1	63485050	63635435	+	150386	0.147541	7.83695	1.36064	0.203076	0.980572	-4.49293
ENSMUSG00000041000	Trim62	4	128777373	128805121	+	27749	-0.128071	5.60641	-1.36031	0.203178	0.980572	-4.49509
ENSMUSG00000039716	Dock3	9	106770024	107109108	-	339085	0.178044	8.5027	1.35981	0.20333	0.980572	-4.49333
ENSMUSG00000089998	Phtf1os	3	103871852	103875897	-	4046	0.249691	1.09451	1.3597	0.203365	0.980572	-4.53641
ENSMUSG00000001855	Nup214	2	31864448	31943987	+	79540	0.159639	6.12387	1.35904	0.203564	0.980572	-4.49609
ENSMUSG00002076083	Klhl17	4	156313792	156319314	-	5523	0.133047	5.69417	1.35888	0.203615	0.980572	-4.49596
ENSMUSG00000028291	Akirin2	4	34550937	34566908	+	15972	-0.146093	5.97369	-1.35868	0.203677	0.980572	-4.49627
ENSMUSG00000104662	Gm43267	5	144160543	144162338	+	1796	-0.281058	0.847756	-1.35833	0.203784	0.980572	-4.53936
ENSMUSG00000022890	Atp5j	16	84624754	84632513	-	7760	-0.1881	6.92273	-1.35831	0.20379	0.980572	-4.4952
ENSMUSG00000026988	Wdsub1	2	59682708	59712935	-	30228	0.1248	4.3004	1.35801	0.203882	0.980572	-4.49434
ENSMUSG00000029625	Cpsf4	5	145104023	145118851	+	14829	0.116609	5.00057	1.35793	0.203907	0.980572	-4.49533
ENSMUSG00000110834	Gm39469	9	124032988	124044769	-	11782	0.304932	2.85667	1.35775	0.203962	0.980572	-4.50688
ENSMUSG00000026603	Smyd2	1	189612689	189654560	-	41872	-0.184391	4.74767	-1.35743	0.20406	0.980572	-4.49491
ENSMUSG00000051413	Plagl2	2	153069679	153083346	-	13668	0.17628	4.2546	1.35689	0.204226	0.980572	-4.49499
ENSMUSG00000071302	2610044O15Rik8	8	129942835	129960887	-	18053	-0.159653	4.70971	-1.35602	0.204492	0.980572	-4.4958
ENSMUSG00000022219	Cideb	14	55991507	55995915	-	4409	-0.215206	1.42209	-1.35478	0.204876	0.980572	-4.531
ENSMUSG00000062296	Trank1	9	111140807	111224843	+	84037	0.219511	9.9198	1.35447	0.20497	0.980572	-4.49696
ENSMUSG00000029397	Rchy1	5	92096763	92110927	-	14165	-0.128522	5.33019	-1.35401	0.205111	0.980572	-4.49836
ENSMUSG00000030611	Mrps11	7	78432867	78442737	+	9871	-0.120898	4.61125	-1.35378	0.205185	0.980572	-4.49666
ENSMUSG00000068551	Zfp467	6	48404631	48422759	-	18129	0.125886	5.71813	1.35378	0.205185	0.980572	-4.49902
ENSMUSG00000042523	Dnal1	12	84161140	84194272	+	33133	0.13023	7.39907	1.35272	0.20551	0.980572	-4.49753
ENSMUSG00000067629	Syngap1	17	27160227	27191408	+	31182	0.211826	8.65583	1.35229	0.205642	0.980572	-4.49725
ENSMUSG00000034024	Cct2	10	116886906	116899719	-	12814	-0.127243	7.22059	-1.35227	0.205649	0.980572	-4.49808
ENSMUSG00000036098	Myrf	19	10185636	10218112	-	32477	0.242181	6.26663	1.35219	0.205676	0.980572	-4.49995
ENSMUSG00000091050	9330020H09Rik	15	98465205	98467464	+	2260	-0.326291	0.530192	-1.35212	0.205698	0.980572	-4.5466
ENSMUSG00000024145		17	87304684	87332834	-	28151	-0.161841	4.10829	-1.35142	0.205913	0.980572	-4.49804
ENSMUSG00000058385		13	23755570	23756187	+	618	-0.337824	-1.32273	-1.35098	0.206048	0.980572	-4.56573
ENSMUSG00000031375	Bgn	X	72527208	72539539	+	12332	-0.176665	3.32208	-1.3504	0.206229	0.980572	-4.50413
ENSMUSG00000058624	Gda	19	21368671	21450809	-	82139	0.135978	8.69959	1.34875	0.206741	0.980572	-4.49908
ENSMUSG00000029165	Agbl5	5	31046038	31064309	+	18272	0.162168	4.94399	1.34848	0.206823	0.980572	-4.50049
ENSMUSG00000030629	Zfand6	7	84262974	84339167	-	76194	-0.182489	6.04686	-1.34846	0.20683	0.980572	-4.50236
ENSMUSG00000016554	Eif3d	15	77843198	77855013	-	11816	-0.127942	6.10713	-1.34832	0.206873	0.980572	-4.50235
ENSMUSG00000000759	Tubgcp3	8	12664277	12722248	-	57972	0.13467	6.04587	1.34771	0.207064	0.980572	-4.50281
ENSMUSG00000037514	Pank2	2	131104415	131141108	+	36694	0.141173	6.48921	1.34765	0.207081	0.980572	-4.50232
ENSMUSG00000085882	2610507I01Rik	11	59090662	59093211	-	2550	0.204515	2.80546	1.34748	0.207135	0.980572	-4.51164
ENSMUSG00000038132	Rbm24	13	46571910	46584571	+	12662	0.119897	5.96868	1.34738	0.207167	0.980572	-4.50298
ENSMUSG00000022474	Pmm1	15	81835309	81845131	-	9823	-0.173596	6.80713	-1.34714	0.207241	0.980572	-4.50186
ENSMUSG00000036333	Kidins220	12	25024924	25113151	+	88228	0.159823	9.06823	1.34708	0.207258	0.980572	-4.49997
ENSMUSG00000065422	Mir221	X	19012533	19012627	-	95	-0.40438	-1.42956	-1.34682	0.20734	0.980572	-4.56602
ENSMUSG00000002997	Prkar2b	12	32008475	32111295	-	102821	-0.158155	7.68687	-1.34678	0.207352	0.980572	-4.50046
ENSMUSG00000026333		1	97697897	97721434	+	23538	-0.130691	4.01381	-1.34624	0.20752	0.980572	-4.50082
ENSMUSG00000020654	Adcy3	12	4183103	4263525	+	80423	0.142328	6.56991	1.34575	0.207674	0.980572	-4.50326
ENSMUSG00000020524	Gria1	11	56902213	57221070	+	318858	0.155975	9.77885	1.34572	0.207683	0.980572	-4.50102
ENSMUSG00000041560	Nop53	7	15670108	15679999	-	9892	-0.216477	6.0338	-1.34542	0.207778	0.980572	-4.50397
ENSMUSG00000018900	Slc22a5	11	53755368	53782486	-	27119	0.261157	4.54547	1.3453	0.207815	0.980572	-4.50123
ENSMUSG00000023391	Dlx2	2	71373752	71377098	-	3347	-0.253364	2.89592	-1.34526	0.207826	0.980572	-4.51215
ENSMUSG00000029463	Fam216a	5	122502643	122510427	-	7785	-0.114694	6.14469	-1.34455	0.208047	0.980572	-4.50457
ENSMUSG00000032667	Pon2	6	5264147	5298455	-	34309	-0.132571	5.5443	-1.34445	0.20808	0.980572	-4.50431
ENSMUSG00000025872	Thoc3	13	54606650	54616662	-	10013	-0.134024	4.48987	-1.34412	0.208181	0.980572	-4.50161
ENSMUSG00000048978	Nrsn1	13	25436023	25454485	-	18463	-0.156768	8.36978	-1.3425	0.208687	0.980572	-4.50239
ENSMUSG00000093565	Rab26os	17	24747222	24747718	+	497	-0.330468	1.2609	-1.34239	0.208722	0.980572	-4.53726
ENSMUSG00000031246	Sh3bgrl	X	108138971	108241479	+	102509	-0.284102	6.55924	-1.34213	0.208804	0.980572	-4.50505
ENSMUSG00000032560	Dnajc13	9	104028481	104140129	-	111649	0.177668	6.62765	1.34153	0.208991	0.980572	-4.50551
ENSMUSG00000057506	Bloc1s2	19	44127685	44134885	-	7201	-0.154048	4.67301	-1.34137	0.209043	0.980572	-4.50357
ENSMUSG00000030967	Zranb1	7	132532871	132588120	+	55250	-0.17934	6.11369	-1.34061	0.20928	0.980572	-4.50695
ENSMUSG00000018565	Elp5	11	69859048	69873343	-	14296	-0.144099	5.71166	-1.34044	0.209334	0.980572	-4.50682
ENSMUSG00000031392	Irak1	X	73057520	73067524	-	10005	0.0889584	6.24082	1.33979	0.209537	0.980572	-4.5074
ENSMUSG00000061517	Sox21	14	118470644	118474442	-	3799	-0.169452	2.98456	-1.33968	0.209574	0.980572	-4.51212
ENSMUSG00000023307	Marchf5	19	37184942	37199550	+	14609	-0.121034	6.18523	-1.33944	0.209649	0.980572	-4.50762
ENSMUSG00000024647	Cbln2	18	86729235	86736408	+	7174	-0.547744	1.95867	-1.33907	0.209765	0.980572	-4.52555
ENSMUSG00000072704	Smim10l1	6	133081872	133087862	+	5991	-0.174601	6.88117	-1.33884	0.209837	0.980572	-4.50626
ENSMUSG00000050552	Lamtor4	5	138253744	138257660	+	3917	-0.241422	4.70987	-1.33881	0.209845	0.980572	-4.50488
ENSMUSG00000010797		6	17988939	18030584	-	41646	-0.230931	4.39525	-1.33831	0.210004	0.980572	-4.50454
ENSMUSG00000030614	Tmem126b	7	90116646	90125209	-	8564	-0.118384	5.40853	-1.3376	0.210227	0.980572	-4.50804
ENSMUSG00000074939	Chrm5	2	112309516	112311114	-	1599	0.608787	1.42329	1.33736	0.210303	0.980572	-4.53573
ENSMUSG00000047909	Ankrd16	2	11782687	11795140	+	12454	0.0911621	5.7286	1.33615	0.210684	0.980572	-4.50943
ENSMUSG00000022814	Umps	16	33775152	33787408	-	12257	-0.11568	4.6415	-1.33597	0.21074	0.980572	-4.50637
ENSMUSG00000044317		7	18946463	18958099	+	11637	-0.324629	2.69951	-1.33576	0.210807	0.980572	-4.51663
ENSMUSG00000062232	Rapgef2	3	78969823	79193824	-	224002	0.19178	7.51577	1.33558	0.210865	0.980572	-4.50677
ENSMUSG00000016559	H3f3b	11	115912738	115918788	-	6051	-0.188234	6.93724	-1.33525	0.210967	0.980572	-4.50824
ENSMUSG00000034863	Ano8	8	71928663	71938607	-	9945	0.101565	5.99523	1.33518	0.210989	0.980572	-4.51014
ENSMUSG00000037236	Matr3	18	35695191	35726888	+	31698	-0.53707	7.52585	-1.33444	0.211225	0.980572	-4.50726
ENSMUSG00000007682	Dio2	12	90691326	90705212	-	13887	-0.44694	6.23031	-1.33425	0.211283	0.980572	-4.51033
ENSMUSG00000050271	Prag1	8	36561982	36614941	+	52960	0.119129	5.00934	1.33392	0.21139	0.980572	-4.50886
ENSMUSG00000074896	Ifit3	19	34560931	34566131	+	5201	-0.18123	2.38203	-1.33392	0.21139	0.980572	-4.52198
ENSMUSG00000035355	Kcnh4	11	100631202	100650768	-	19567	0.162515	5.88671	1.33377	0.211436	0.980572	-4.51088
ENSMUSG00000037022	Mmaa	8	79990227	80021566	-	31340	0.140135	6.35029	1.33354	0.211508	0.980572	-4.51092
ENSMUSG00000029062	Cdk11b	4	155709311	155734395	+	25085	-0.125796	6.08938	-1.33339	0.211557	0.980572	-4.51114
ENSMUSG00000032216	Nedd4	9	72569628	72657134	+	87507	0.157832	9.37517	1.33319	0.211621	0.980572	-4.50696
ENSMUSG00000022197	Pdzd2	15	12359797	12740010	-	380214	0.20613	8.42402	1.33255	0.211824	0.980572	-4.50754
ENSMUSG00000106981	Gm45495	5	53439152	53440851	+	1700	-0.175009	3.35876	-1.33243	0.21186	0.980572	-4.51115
ENSMUSG00000036992	Nxt1	2	148514521	148517947	+	3427	-0.212228	2.93967	-1.33229	0.211905	0.980572	-4.51526
ENSMUSG00000029438	Bcl7a	5	123481897	123513055	+	31159	0.117973	6.19464	1.33199	0.212001	0.980572	-4.51199
ENSMUSG00000020521	Rnft1	11	86375483	86389851	+	14369	-0.131774	5.16965	-1.33099	0.212316	0.980572	-4.51136
ENSMUSG00000001036	Epn2	11	61408075	61470513	-	62439	0.113957	7.63332	1.33097	0.212324	0.980572	-4.50909
ENSMUSG00000055958	Gm9987	10	58648396	58648964	-	569	0.515009	-1.27187	1.33065	0.212426	0.980572	-4.56627
ENSMUSG00000059708	Akap17b	X	35871967	35909048	-	37082	0.187895	5.56706	1.33062	0.212434	0.980572	-4.51248
ENSMUSG00000014504	Srp19	18	34463900	34469652	+	5753	-0.18138	4.93746	-1.33057	0.212449	0.980572	-4.51059
ENSMUSG00000012405	Rpl15	14	4198305	4201873	+	3569	-0.160953	6.51872	-1.33023	0.212558	0.980572	-4.51234
ENSMUSG00000047797	Gjb1	X	100419984	100429235	+	9252	0.240962	3.26692	1.33023	0.212559	0.980572	-4.51294
ENSMUSG00000117729	Gm5242	19	5181768	5183000	-	1233	-0.248069	1.26697	-1.32987	0.212673	0.980572	-4.53989
ENSMUSG00000063077	Kif1b	4	149260776	149392150	-	131375	0.192538	9.80566	1.3293	0.212854	0.980572	-4.50894
ENSMUSG00000118668	Rps6ka4	19	6806578	6818004	-	11427	0.164157	5.2186	1.32923	0.212878	0.980572	-4.51237
ENSMUSG00000020585	Laptm4a	12	8971664	8988742	+	17079	-0.131384	7.24241	-1.32921	0.212882	0.980572	-4.51078
ENSMUSG00000027637	Rab5if	2	156705048	156715483	+	10436	-0.164927	5.34083	-1.3292	0.212886	0.980572	-4.51268
ENSMUSG00000027752	Exosc8	3	54636099	54642814	-	6716	-0.134795	4.70043	-1.32882	0.213006	0.980572	-4.51055
ENSMUSG00000035245	Eogt	6	97086985	97126143	-	39159	0.124108	5.76129	1.32853	0.2131	0.980572	-4.51397
ENSMUSG00000061755	Bod1l	5	41944881	42001658	-	56778	0.19336	6.91476	1.32824	0.213191	0.980572	-4.51222
ENSMUSG00000033228	Scaf11	15	96309580	96358724	-	49145	0.128227	6.16729	1.32806	0.21325	0.980572	-4.51432
ENSMUSG00000030697	Ppp4c	7	126385038	126391668	-	6631	-0.151791	5.22067	-1.32802	0.213263	0.980572	-4.51295
ENSMUSG00000032485	Scap	9	110162356	110214018	+	51663	0.110684	6.82298	1.328	0.213267	0.980572	-4.51273
ENSMUSG00000057531	Dtnbp1	13	45075551	45155623	-	80073	-0.166218	6.20126	-1.32775	0.213348	0.980572	-4.51443
ENSMUSG00000063882	Uqcrh	4	115924162	115932268	-	8107	-0.18655	7.05955	-1.32655	0.21373	0.980572	-4.51285
ENSMUSG00000022538	Lsg1	16	30379312	30406410	-	27099	-0.105363	4.64946	-1.32641	0.213774	0.980572	-4.51162
ENSMUSG00000026618	Iars2	1	185016923	185061593	-	44671	0.103141	5.79529	1.3261	0.213874	0.980572	-4.51534
ENSMUSG00000031954	Cfdp1	8	112495123	112580923	-	85801	-0.193929	5.94108	-1.32584	0.213958	0.980572	-4.51546
ENSMUSG00000041355	Ssr2	3	88483183	88495726	+	12544	-0.160616	5.58123	-1.32535	0.214114	0.980572	-4.51539
ENSMUSG00000020827	Mink1	11	70453707	70505309	+	51603	0.140164	8.95136	1.32522	0.214156	0.980572	-4.51101
ENSMUSG00000004980	Hnrnpa2b1	6	51437912	51446874	-	8963	-0.144438	9.28268	-1.32496	0.214238	0.980572	-4.51102
ENSMUSG00000021143	Pacs2	12	112978128	113038021	+	59894	0.156268	7.64982	1.32407	0.214523	0.980572	-4.51279
ENSMUSG00000031168	Ebp	X	8051568	8059751	-	8184	-0.150776	3.73397	-1.32369	0.214646	0.980572	-4.51237
ENSMUSG00000023932	Cdc5l	17	45702810	45744663	-	41854	-0.110095	5.90064	-1.3232	0.214802	0.980572	-4.51711
ENSMUSG00000022037	Clu	14	66205932	66218996	+	13065	-0.137382	9.30781	-1.32275	0.214948	0.980572	-4.51212
ENSMUSG00000007880	Arid1a	4	133406319	133484080	-	77762	0.185352	7.6071	1.32256	0.215007	0.980572	-4.51369
ENSMUSG00000028899	Taf12	4	132001686	132023077	+	21392	-0.144029	4.18376	-1.32214	0.215142	0.980572	-4.5124
ENSMUSG00000029632	Ndufa4	6	11900291	11907496	-	7206	-0.232161	7.40005	-1.32195	0.215203	0.980572	-4.51452
ENSMUSG00000033039	Micall1	15	78993098	79021100	+	28003	0.20795	5.87418	1.32173	0.215276	0.980572	-4.51801
ENSMUSG00000026820	Ptges2	2	32285908	32295784	+	9877	-0.131491	4.67068	-1.3217	0.215285	0.980572	-4.51422
ENSMUSG00000027663	Zmat3	3	32388941	32420163	-	31223	0.128417	6.67612	1.32161	0.215311	0.980572	-4.51678
ENSMUSG00000004356		10	88582469	88662666	-	80198	0.150011	5.41222	1.32128	0.215418	0.980572	-4.51752
ENSMUSG00000029233	Srd5a3	5	76288118	76303351	+	15234	0.140544	3.84314	1.32102	0.215502	0.980572	-4.51328
ENSMUSG00000032181	Scg3	9	75550471	75591338	-	40868	-0.101007	7.70084	-1.32101	0.215507	0.980572	-4.51438
ENSMUSG00000043923	Ccdc84	9	44321456	44329866	-	8411	-0.0979741	4.36463	-1.3206	0.215636	0.980572	-4.5135
ENSMUSG00000097885	5031434O11Rik	3	51467456	51474538	+	7083	0.142608	3.2122	1.32053	0.215661	0.980572	-4.51714
ENSMUSG00000036550	Cnot1	8	96446079	96534092	-	88014	0.17067	7.33691	1.3204	0.215702	0.980572	-4.5154
ENSMUSG00000060288	Ppih	4	119157207	119177743	-	20537	-0.117899	4.0277	-1.32034	0.215723	0.980572	-4.51324
ENSMUSG00000055485	Soga1	2	156857719	156921174	-	63456	0.433098	5.38991	1.32032	0.215729	0.980572	-4.51793
ENSMUSG00000027706	Sec62	3	30847024	30875412	+	28389	-0.19952	7.3106	-1.31978	0.215902	0.980572	-4.5158
ENSMUSG00000021040	Slirp	12	87490666	87498976	+	8311	-0.203042	4.55691	-1.31974	0.215913	0.980572	-4.51456
ENSMUSG00000090086	AI480526	5	123271786	123279729	-	7944	0.187244	5.88346	1.31907	0.216131	0.980572	-4.51954
ENSMUSG00000048478	Spata33	8	123939571	123948785	+	9215	0.173101	2.91306	1.31794	0.216493	0.980572	-4.52108
ENSMUSG00000003458	Ncstn	1	171893580	171910362	-	16783	0.103137	6.15297	1.3165	0.216959	0.980572	-4.5211
ENSMUSG00000020163	Uqcr11	10	80238831	80242664	-	3834	-0.253488	6.16722	-1.31541	0.217313	0.980572	-4.52145
ENSMUSG00000023960	Enpp5	17	44389704	44397458	+	7755	0.104347	8.42422	1.31535	0.217331	0.980572	-4.51645
ENSMUSG00000018909	Arrb1	7	99184673	99255978	+	71306	0.146363	8.76679	1.31524	0.217367	0.980572	-4.51616
ENSMUSG00000035828	Pim3	15	88746389	88749929	+	3541	-0.142446	5.39671	-1.3151	0.217411	0.980572	-4.52091
ENSMUSG00000034163	Zfc3h1	10	115220864	115268677	+	47814	0.160093	6.53428	1.31486	0.21749	0.980572	-4.52116
ENSMUSG00000015597	Zfp318	17	46694657	46731846	+	37190	0.160129	6.14592	1.31472	0.217536	0.980572	-4.52215
ENSMUSG00000019782	Rwdd1	10	33872551	33895620	-	23070	-0.177665	4.25242	-1.31471	0.217538	0.980572	-4.51615
ENSMUSG00000023079	Gtf2ird1	5	134386510	134485570	-	99061	0.124898	5.87961	1.3137	0.217866	0.980572	-4.52268
ENSMUSG00000026568	Mpc2	1	165288206	165308783	+	20578	-0.155041	5.51416	-1.3135	0.21793	0.980572	-4.52216
ENSMUSG00000034271	Jdp2	12	85645801	85686652	+	40852	-0.164862	4.65962	-1.31291	0.218123	0.980572	-4.51897
ENSMUSG00000087598	Zfp111	7	23893372	23910868	-	17497	0.141073	3.69933	1.31251	0.218252	0.980572	-4.51743
ENSMUSG00000024978	Gpam	19	55055700	55115670	-	59971	0.124419	6.82678	1.31235	0.218304	0.980572	-4.52138
ENSMUSG00000015092	Edf1	2	25447859	25452094	+	4236	-0.200506	5.94554	-1.31225	0.218338	0.980572	-4.52332
ENSMUSG00000077192	Snora17	2	26529202	26529333	-	132	-0.398751	-1.29907	-1.31185	0.218466	0.980572	-4.56859
ENSMUSG00000086794	Gm11642	11	103614776	103615358	+	583	-0.378895	-0.136896	-1.31168	0.218521	0.980572	-4.55959
ENSMUSG00000022054	Nefm	14	68320039	68362295	-	42257	-0.366895	6.50757	-1.3114	0.218614	0.980572	-4.52288
ENSMUSG00000031170		X	8137372	8146418	+	9047	-0.272184	2.15556	-1.31135	0.218631	0.980572	-4.53112
ENSMUSG00000078439		10	81228885	81231226	+	2342	-0.343167	0.394745	-1.31129	0.218648	0.980572	-4.5549
ENSMUSG00000105692	Gm43737	3	89117732	89120471	+	2740	-0.15322	3.15103	-1.31084	0.218797	0.980572	-4.52122
ENSMUSG00000005873	Reep5	18	34477938	34507123	-	29186	-0.11317	8.44822	-1.31076	0.218822	0.980572	-4.51875
ENSMUSG00000028821	Syf2	4	134658209	134664859	+	6651	-0.174253	5.40697	-1.31073	0.218832	0.980572	-4.52334
ENSMUSG00000038446	Cdc40	10	40707617	40759307	-	51691	0.0985763	5.89006	1.31016	0.219016	0.980572	-4.5248
ENSMUSG00000056602	Fry	5	150042110	150421218	+	379109	0.201102	8.02223	1.30968	0.219173	0.980572	-4.51986
ENSMUSG00000034509	Mad2l1bp	17	46458313	46464479	-	6167	-0.18049	2.82019	-1.30916	0.219344	0.980572	-4.52481
ENSMUSG00000073478	D730003I15Rik	1	190956651	190958337	+	1687	-0.220224	1.05619	-1.30852	0.219552	0.980572	-4.54735
ENSMUSG00000026344	Lypd1	1	125795359	125840838	-	45480	-0.157057	7.11789	-1.30843	0.219582	0.980572	-4.52272
ENSMUSG00000020361	Hspa4	11	53150641	53191284	-	40644	-0.117197	8.12742	-1.30821	0.219654	0.980572	-4.52048
ENSMUSG00000060708	Bloc1s4	5	36904722	36905994	-	1273	-0.232145	3.1866	-1.30806	0.219701	0.980572	-4.52222
ENSMUSG00000025353	Ormdl2	10	128653771	128657514	-	3744	-0.226108	2.69838	-1.30805	0.219705	0.980572	-4.5267
ENSMUSG00000061778	Mospd2	X	163719165	163763371	-	44207	0.126382	5.24851	1.30805	0.219706	0.980572	-4.52479
ENSMUSG00000039294	Cybc1	11	121113414	121120148	-	6735	-0.109355	4.71929	-1.30797	0.219732	0.980572	-4.52201
ENSMUSG00000024122	Pdpk1	17	24292654	24369898	-	77245	0.191335	7.77375	1.30771	0.219818	0.980572	-4.52127
ENSMUSG00000015714	Cers2	3	95222102	95230910	+	8809	0.134176	6.10291	1.30756	0.219866	0.980572	-4.52632
ENSMUSG00000024019	Cmtr1	17	29879569	29924953	+	45385	-0.112881	4.76756	-1.30753	0.219875	0.980572	-4.52236
ENSMUSG00000018678	Sp2	11	96844167	96873785	-	29619	0.131589	4.41065	1.30701	0.220046	0.980572	-4.5207
ENSMUSG00000097316	Gm10516	1	191821196	191835323	+	14128	0.17812	3.99561	1.30694	0.220068	0.980572	-4.51959
ENSMUSG00000029149		5	31409035	31410546	+	1512	0.294511	-0.121209	1.30679	0.220118	0.980572	-4.56035
ENSMUSG00000025571	Tnrc6c	11	117545115	117654265	+	109151	0.16321	7.10839	1.30592	0.220401	0.980572	-4.52407
ENSMUSG00000047888		15	80595514	80825286	+	229773	0.265201	6.94021	1.30582	0.220434	0.980572	-4.52459
ENSMUSG00000047721	Bola2	7	126294573	126298970	+	4398	-0.260528	4.3279	-1.30551	0.220537	0.980572	-4.52092
ENSMUSG00000100147	1700047M11Rik	1	182115555	182130890	+	15336	0.220306	4.29999	1.30549	0.220542	0.980572	-4.52107
ENSMUSG00000071719	Tmem28	X	98864627	98892396	+	27770	-0.125909	4.77243	-1.30516	0.220651	0.980572	-4.524
ENSMUSG00000083844	Ube2d-ps	11	5712129	5734710	+	22582	-0.101147	4.45438	-1.30498	0.22071	0.980572	-4.52204
ENSMUSG00000021774	Ube2e1	14	4137837	4186974	+	49138	-0.17818	5.91227	-1.30459	0.22084	0.980572	-4.52797
ENSMUSG00000002103	Acp2	2	91033230	91044443	+	11214	0.105513	6.36497	1.30441	0.220898	0.980572	-4.52777
ENSMUSG00000037979	Ccdc92	5	124911482	124939488	-	28007	-0.107143	6.41859	-1.30398	0.221038	0.980572	-4.52784
ENSMUSG00000032109	Nlrx1	9	44164014	44179896	-	15883	0.151082	3.28058	1.30371	0.221127	0.980572	-4.52304
ENSMUSG00000039473	Ubn1	16	4867921	4904153	+	36233	0.13162	6.58668	1.30343	0.221219	0.980572	-4.52756
ENSMUSG00000019054	Fis1	5	136982129	136995088	+	12960	-0.158776	6.82358	-1.30331	0.221258	0.980572	-4.52666
ENSMUSG00000020048	Hsp90b1	10	86526073	86541373	-	15301	-0.138326	8.7329	-1.3032	0.221295	0.980572	-4.52229
ENSMUSG00000057130	Txnl4a	18	80250010	80269070	+	19061	-0.117457	4.42991	-1.30272	0.221454	0.980572	-4.52291
ENSMUSG00000004815	Dgkq	5	108794559	108817538	-	22980	0.180254	5.79148	1.3026	0.221493	0.980572	-4.52901
ENSMUSG00000042507	Mideas	12	84195950	84265655	-	69706	0.222131	5.3034	1.30215	0.22164	0.980572	-4.52817
ENSMUSG00000006717	Acot13	13	25001931	25015523	-	13593	-0.177893	5.29785	-1.30174	0.221776	0.980572	-4.52814
ENSMUSG00000110760	Gm39456	9	120440720	120449365	-	8646	0.248479	2.84841	1.30141	0.221884	0.980572	-4.52703
ENSMUSG00000043162	Pyurf	6	57663561	57669063	-	5503	-0.14615	3.38597	-1.30106	0.222	0.980572	-4.52345
ENSMUSG00000115007	5830448L01Rik	14	34394422	34395720	-	1299	-0.241139	0.772482	-1.301	0.222019	0.980572	-4.55171
ENSMUSG00000084941		11	3258996	3270722	+	11727	-0.188881	2.74625	-1.30098	0.222025	0.980572	-4.52821
ENSMUSG00000049583	Grm5	7	87233376	87784115	+	550740	0.163649	8.73993	1.30061	0.222146	0.980572	-4.52354
ENSMUSG00000035478	Mbd3	10	80228373	80235384	-	7012	-0.166125	6.55275	-1.29992	0.222373	0.980572	-4.52966
ENSMUSG00000068523	Gng5	3	146205562	146211327	+	5766	-0.171408	3.51218	-1.29985	0.222398	0.980572	-4.52362
ENSMUSG00000042734	Ttc9	12	81678023	81714331	+	36309	0.111855	5.8811	1.29979	0.222416	0.980572	-4.53079
ENSMUSG00000036572	Upf3b	X	36355331	36373975	-	18645	-0.114763	5.85521	-1.29979	0.222419	0.980572	-4.53076
ENSMUSG00000053094	Tmem248	5	130245922	130272606	+	26685	-0.0887332	5.72755	-1.29922	0.222604	0.980572	-4.53087
ENSMUSG00000032402	Smad3	9	63554049	63665276	-	111228	0.149603	6.98212	1.29864	0.222795	0.980572	-4.52849
ENSMUSG00000021905	Dph3	14	31802523	31807686	-	5164	-0.111821	4.72728	-1.29847	0.222852	0.980572	-4.52717
ENSMUSG00000033739	Fkbpl	17	34863738	34865298	+	1561	-0.230999	2.51794	-1.29818	0.222949	0.980572	-4.53184
ENSMUSG00000056629	Fkbp2	19	6955109	6957869	-	2761	-0.236187	5.89019	-1.29814	0.222962	0.980572	-4.53148
ENSMUSG00000021253	Tgfb3	12	86103519	86125815	-	22297	-0.166551	4.00319	-1.29786	0.223056	0.980572	-4.52382
ENSMUSG00000024194	Cuta	17	27152793	27158543	-	5751	-0.192955	4.63961	-1.29768	0.223116	0.980572	-4.52653
ENSMUSG00000085829	Gm4285	14	76080819	76082404	-	1586	-0.18042	1.32766	-1.29625	0.223588	0.980572	-4.54582
ENSMUSG00000104241	Gm9442	3	51310265	51310583	-	319	-0.533893	-1.55183	-1.29619	0.223607	0.980572	-4.57243
ENSMUSG00000056493	Foxk1	5	142387252	142447766	+	60515	0.19498	6.12239	1.29593	0.223695	0.980572	-4.53315
ENSMUSG00000033998	Kcnk1	8	126721909	126757424	+	35516	-0.157653	6.24485	-1.29587	0.223715	0.980572	-4.53291
ENSMUSG00000040481	Bptf	11	106923907	107022953	-	99047	0.209511	7.46246	1.29566	0.223783	0.980572	-4.52848
ENSMUSG00000051518	Rps19bp1	15	80144816	80148516	-	3701	-0.220575	3.93431	-1.29565	0.223786	0.980572	-4.52474
ENSMUSG00000026833	Olfm1	2	28083004	28120748	+	37745	-0.187644	7.32499	-1.29545	0.223853	0.980572	-4.52908
ENSMUSG00000106746	2900064F13Rik	5	81974663	81975670	+	1008	-0.40501	2.31942	-1.29522	0.22393	0.980572	-4.53355
ENSMUSG00000003526	Prodh	16	17878221	17908067	-	29847	-0.118548	5.17839	-1.29503	0.223992	0.980572	-4.53159
ENSMUSG00000026924	Sec16a	2	26299443	26335228	-	35786	0.19337	6.84501	1.2949	0.224037	0.980572	-4.53122
ENSMUSG00000035964	Tmem59l	8	70936517	70940008	-	3492	-0.120847	7.23344	-1.29446	0.224181	0.980572	-4.52997
ENSMUSG00000000532	Acvr1b	15	101071948	101111565	+	39618	0.109437	7.12618	1.29386	0.22438	0.980572	-4.53062
ENSMUSG00000073434	Wdr90	17	26063745	26080475	-	16731	0.182726	4.63357	1.29355	0.224485	0.980572	-4.52892
ENSMUSG00000022629	Kif21a	15	90817479	90934151	-	116673	0.163722	7.79968	1.29351	0.224497	0.980572	-4.52874
ENSMUSG00000001227	Sema6b	17	56430085	56447343	-	17259	0.106601	6.75581	1.29338	0.224541	0.980572	-4.53264
ENSMUSG00000027799	Nbea	3	55532616	56091122	-	558507	0.173272	8.57493	1.29325	0.224586	0.980572	-4.52752
ENSMUSG00000022515	Anks3	16	4759300	4782069	-	22770	0.0990785	6.51086	1.29324	0.224589	0.980572	-4.53378
ENSMUSG00000019975	Ikbip	10	90918802	90938469	+	19668	-0.145726	3.64016	-1.29282	0.224728	0.980572	-4.52613
ENSMUSG00000025470	Zfp511	7	139616304	139620515	+	4212	-0.122593	4.50956	-1.29271	0.224764	0.980572	-4.52844
ENSMUSG00000068284	Usf3	16	43993609	44047828	+	54220	0.228892	6.39311	1.29251	0.224829	0.980572	-4.53447
ENSMUSG00000007097	Atp1a2	1	172099276	172125631	-	26356	-0.138531	9.96518	-1.29246	0.224847	0.980572	-4.52636
ENSMUSG00000034951	Cog7	7	121478586	121580934	-	102349	0.126958	5.92284	1.29243	0.224856	0.980572	-4.53502
ENSMUSG00000024687	Osbp	19	11943305	11971476	+	28172	0.120708	6.6467	1.29243	0.224856	0.980572	-4.53355
ENSMUSG00000050621	Rps27rt	9	114811434	114811807	-	374	0.417305	-0.271405	1.29238	0.224872	0.980572	-4.56515
ENSMUSG00000022822	Abcc5	16	20150053	20245144	-	95092	0.178611	8.58748	1.29201	0.224996	0.980572	-4.52813
ENSMUSG00000091449	Gm10269	18	20815651	20816020	-	370	-0.431292	-1.85043	-1.29105	0.225317	0.980572	-4.5744
ENSMUSG00000023912	Slc25a27	17	43952782	43978105	-	25324	0.178998	6.75958	1.29081	0.225396	0.980572	-4.5339
ENSMUSG00000037344	Slc12a9	5	137312820	137331859	-	19040	0.108467	5.45324	1.29026	0.225579	0.980572	-4.53532
ENSMUSG00000041852	Tcf20	15	82692637	82872073	-	179437	0.166579	7.59678	1.29025	0.225585	0.980572	-4.53095
ENSMUSG00000053297	AI854703	6	48603698	48610623	+	6926	0.0969537	4.77181	1.29014	0.22562	0.980572	-4.53202
ENSMUSG00000041341	Atg2b	12	105582395	105651470	-	69076	0.23145	6.18683	1.2901	0.225635	0.980572	-4.53638
ENSMUSG00000085795	Zfp703	8	27467353	27471489	+	4137	-0.154662	4.0679	-1.28994	0.225686	0.980572	-4.5277
ENSMUSG00000022016	Akap11	14	78729686	78774248	-	44563	0.15072	8.66348	1.28961	0.225799	0.980572	-4.52919
ENSMUSG00000053390	Zfp952	17	33212103	33224431	+	12329	0.113379	4.79854	1.28943	0.225857	0.980572	-4.53276
ENSMUSG00000050357	Carmil2	8	106412906	106424819	+	11914	-0.141832	5.17987	-1.28905	0.225986	0.980572	-4.53484
ENSMUSG00000027533	Fabp5	3	10077608	10081667	+	4060	-0.197193	5.34334	-1.28877	0.226078	0.980572	-4.53545
ENSMUSG00000028334	Nans	4	46489248	46503632	+	14385	-0.161177	3.53185	-1.2887	0.226102	0.980572	-4.52817
ENSMUSG00000031358	Msl3	X	167437113	167456894	-	19782	0.105049	4.37409	1.28869	0.226106	0.980572	-4.52999
ENSMUSG00000057113	Npm1	11	33102287	33113206	-	10920	-0.163162	6.93538	-1.28849	0.226172	0.980572	-4.53452
ENSMUSG00000006526	Stimate	14	30547547	30599167	+	51621	0.127611	5.22647	1.28848	0.226174	0.980572	-4.53569
ENSMUSG00000031626	Sorbs2	8	45960825	46280943	+	320119	0.222312	8.13554	1.28835	0.226218	0.980572	-4.53072
ENSMUSG00000015659	Serac1	17	6092471	6130016	-	37546	0.28196	5.50105	1.28797	0.226346	0.980572	-4.53696
ENSMUSG00000041477	Dcp1b	6	119152214	119198577	+	46364	0.157151	5.52969	1.28766	0.226448	0.980572	-4.53718
ENSMUSG00000019990	Pde7b	10	20273750	20600824	-	327075	0.191502	7.81989	1.28712	0.22663	0.980572	-4.5321
ENSMUSG00000028053	Ash1l	3	88857929	88986682	+	128754	0.226685	7.70801	1.28709	0.226642	0.980572	-4.53231
ENSMUSG00000097509	B230322F03Rik	7	35254792	35256360	+	1569	0.32657	0.0649023	1.28672	0.226764	0.980572	-4.56097
ENSMUSG00000047037	Nipa1	7	55627315	55669702	-	42388	0.156313	5.97137	1.28663	0.226794	0.980572	-4.53846
ENSMUSG00000059839	Zfp874b	13	67619632	67632377	-	12746	-0.14438	3.83987	-1.28659	0.226809	0.980572	-4.52881
ENSMUSG00000038412	Higd1a	9	121677629	121687428	-	9800	-0.142721	5.68427	-1.28616	0.226952	0.980572	-4.53829
ENSMUSG00000030091		6	90990050	91093811	-	103762	0.167071	5.88715	1.28615	0.226955	0.980572	-4.53869
ENSMUSG00000100393		1	186437892	186439230	+	1339	-0.33705	-0.571257	-1.28603	0.226997	0.980572	-4.56608
ENSMUSG00000027406	Idh3b	2	130121229	130126467	-	5239	-0.103266	7.62594	-1.28572	0.227102	0.980572	-4.53337
ENSMUSG00000046805	Mpeg1	19	12438143	12442647	+	4505	0.136164	5.00038	1.28486	0.227389	0.980572	-4.53671
ENSMUSG00000018428	Akap1	11	88721618	88755412	-	33795	0.110262	6.25052	1.28485	0.227393	0.980572	-4.53936
ENSMUSG00000049516	Spty2d1	7	46640144	46658159	-	18016	-0.126198	4.74556	-1.28455	0.227494	0.980572	-4.53508
ENSMUSG00000022008	Gpalpp1	14	76323676	76348200	-	24525	0.124948	5.60288	1.2845	0.227509	0.980572	-4.53917
ENSMUSG00000007891	Ctsd	7	141929648	141941775	-	12128	0.155549	5.45074	1.28397	0.227688	0.980572	-4.53898
ENSMUSG00000034035	Ccdc17	4	116453851	116457463	+	3613	0.319656	0.847076	1.28318	0.227955	0.980572	-4.55418
ENSMUSG00000028649	Macf1	4	123243426	123578153	-	334728	0.298033	9.29948	1.28311	0.227979	0.980572	-4.53147
ENSMUSG00000052137	Rbm12b2	4	12089439	12096243	+	6805	-0.16518	4.49895	-1.28278	0.22809	0.980572	-4.53422
ENSMUSG00000020473	Aebp1	11	5811947	5822088	+	10142	-0.192961	2.76551	-1.28277	0.228091	0.980572	-4.53463
ENSMUSG00000010392	Gosr1	11	76617428	76654405	-	36978	0.116363	6.0532	1.28216	0.228297	0.980572	-4.54108
ENSMUSG00000019822	Smpd2	10	41361638	41366365	-	4728	-0.152338	3.93944	-1.28203	0.228342	0.980572	-4.53098
ENSMUSG00000046727	Cystm1	18	36475573	36536150	+	60578	-0.158303	5.28564	-1.28178	0.228425	0.980572	-4.53953
ENSMUSG00000032875	Arhgef17	7	100518959	100581314	-	62356	0.117077	8.08363	1.2817	0.228453	0.980572	-4.53435
ENSMUSG00000052681	Rap1b	10	117649776	117681940	-	32165	-0.163908	5.88566	-1.28162	0.228481	0.980572	-4.54127
ENSMUSG00000071172	Srsf3	17	29251602	29262347	+	10746	-0.132206	7.19895	-1.28119	0.228626	0.980572	-4.53722
ENSMUSG00000005198	Polr2a	11	69624823	69649463	-	24641	0.169145	6.56138	1.28112	0.228649	0.980572	-4.54039
ENSMUSG00000022749	Tbc1d23	16	56989225	57051867	-	62643	0.0946188	6.02573	1.28031	0.228922	0.980572	-4.54215
ENSMUSG00000025512	Chid1	7	141073049	141119770	-	46722	0.100952	6.26925	1.27966	0.229141	0.980572	-4.5423
ENSMUSG00000008333	Snrpb2	2	142904959	142914773	+	9815	-0.164898	4.54172	-1.27957	0.229172	0.980572	-4.53574
ENSMUSG00000046523	Kctd4	14	76192449	76203646	+	11198	0.204595	4.80608	1.27871	0.229463	0.980572	-4.53831
ENSMUSG00000048967	Yjefn3	8	70340438	70355362	-	14925	-0.146631	4.48983	-1.27855	0.229518	0.980572	-4.53557
ENSMUSG00000005899	Smpd4	16	17437218	17462692	+	25475	0.111735	6.86691	1.27818	0.229643	0.980572	-4.54048
ENSMUSG00000020282	Rhbdf1	11	32159585	32172300	-	12716	0.164396	3.27938	1.27774	0.229791	0.980572	-4.53323
ENSMUSG00000018865	Sult4a1	15	83960298	83989955	-	29658	-0.115242	8.10764	-1.27736	0.22992	0.980572	-4.53653
ENSMUSG00000022110	Sucla2	14	73762759	73833582	+	70824	-0.11909	7.05777	-1.27732	0.229934	0.980572	-4.53999
ENSMUSG00000042354	Gnl3	14	30734390	30741109	-	6720	-0.121777	4.86477	-1.27718	0.229981	0.980572	-4.53962
ENSMUSG00000049721	Gal3st1	11	3933636	3949326	+	15691	0.201907	3.56771	1.27709	0.230013	0.980572	-4.53289
ENSMUSG00000021245	Mlh3	12	85281294	85317373	-	36080	0.127399	5.26781	1.27621	0.230313	0.980572	-4.54273
ENSMUSG00000050310	Rictor	15	6737860	6829882	+	92023	0.225468	6.41368	1.27591	0.230411	0.980572	-4.5438
ENSMUSG00000031953		8	112589670	112603382	-	13713	0.15636	2.96328	1.27586	0.23043	0.980572	-4.53528
ENSMUSG00000022505	Emp2	16	10099613	10131832	-	32220	-0.111667	4.70974	-1.27564	0.230504	0.980572	-4.53914
ENSMUSG00000022639	Dubr	16	50539657	50553136	-	13480	0.173359	4.81576	1.27501	0.230717	0.980572	-4.54086
ENSMUSG00000039737	Prkrip1	5	136206981	136227817	-	20837	-0.116436	4.62814	-1.27395	0.231078	0.980572	-4.53951
ENSMUSG00000034820	Cpsf7	19	10502630	10525017	+	22388	0.107943	6.91108	1.27391	0.231093	0.980572	-4.5426
ENSMUSG00000024238	Zeb1	18	5591860	5775467	+	183608	0.135769	7.27347	1.27381	0.231126	0.980572	-4.54087
ENSMUSG00000010277	2610507B11Rik	11	78152578	78181449	+	28872	0.145902	8.44571	1.27364	0.231185	0.980572	-4.53769
ENSMUSG00000017390	Aldoc	11	78213794	78218607	+	4814	-0.126185	9.27734	-1.27257	0.23155	0.980572	-4.53663
ENSMUSG00000086040	Wipf3	6	54406588	54480753	+	74166	0.133652	8.33621	1.27226	0.231656	0.980572	-4.53866
ENSMUSG00000051375	Pcdh1	18	38318967	38345106	-	26140	0.181215	7.77025	1.27169	0.231851	0.980572	-4.54027
ENSMUSG00000041920	Slc16a6	11	109341681	109364424	-	22744	0.240926	4.9531	1.2716	0.23188	0.980572	-4.54371
ENSMUSG00000044550	Tceal3	X	135491591	135569127	+	77537	-0.197735	6.02733	-1.27114	0.232036	0.980572	-4.54701
ENSMUSG00000032125	Robo4	9	37313193	37326411	+	13219	-0.182172	3.20276	-1.271	0.232087	0.980572	-4.53603
ENSMUSG00000023015	Racgap1	15	99518377	99549537	-	31161	-0.138142	4.26379	-1.27063	0.232213	0.980572	-4.53808
ENSMUSG00000041264	Uspl1	5	149121160	149152244	+	31085	-0.107301	5.57426	-1.27057	0.232233	0.980572	-4.54698
ENSMUSG00000020309	Chac2	11	30926707	30936350	-	9644	-0.193497	3.38263	-1.27053	0.232248	0.980572	-4.53574
ENSMUSG00000029447	Cct6a	5	129864062	129875212	+	11151	-0.100038	7.39387	-1.27003	0.232418	0.980572	-4.54244
ENSMUSG00000027525	Phactr3	2	177760768	177980285	+	219518	-0.113589	7.38789	-1.26958	0.232573	0.980572	-4.54278
ENSMUSG00000025262	Fam120c	X	150127171	150254838	+	127668	0.369716	6.13564	1.26947	0.23261	0.980572	-4.54815
ENSMUSG00000056856	Jakmip3	7	138542459	138663892	+	121434	0.199458	6.39556	1.26944	0.232619	0.980572	-4.54768
ENSMUSG00000038550	Ciart	3	95785815	95789563	-	3749	-0.159596	4.36849	-1.26936	0.232647	0.980572	-4.53959
ENSMUSG00000016257	Prelid3b	2	174306860	174314874	-	8015	-0.127399	5.17757	-1.26854	0.232929	0.980572	-4.54636
ENSMUSG00000025246	Tbl1x	X	76554619	76706589	+	151971	0.117919	6.8085	1.26831	0.233007	0.980572	-4.54621
ENSMUSG00000000148	Brat1	5	140690766	140705134	+	14369	0.0993897	4.80915	1.26737	0.23333	0.980572	-4.54462
ENSMUSG00000099881	2810013P06Rik	8	123769205	123771341	+	2137	-0.134472	4.08865	-1.2668	0.233526	0.980572	-4.53882
ENSMUSG00000006763		7	46335532	46360104	-	24573	0.139763	3.74193	1.26626	0.233711	0.980572	-4.53761
ENSMUSG00000026442	Nfasc	1	132492428	132669535	-	177108	0.239085	8.61313	1.26602	0.233791	0.980572	-4.54115
ENSMUSG00000025272	Tro	X	149428300	149440579	-	12280	0.173351	8.6538	1.26601	0.233797	0.980572	-4.54109
ENSMUSG00000045374	Wdr81	11	75331770	75345543	-	13774	0.140541	5.19676	1.26595	0.233818	0.980572	-4.54819
ENSMUSG00000075289	Carns1	19	4214323	4225478	-	11156	0.180155	3.38571	1.26584	0.233856	0.980572	-4.53765
ENSMUSG00000073481	Mtarc2	1	184545265	184578648	-	33384	-0.112238	5.31661	-1.26561	0.233933	0.980572	-4.5486
ENSMUSG00000045994	B3gat1	9	26645024	26674397	+	29374	0.137643	7.82589	1.26501	0.23414	0.980572	-4.54364
ENSMUSG00000053641	Dennd4a	9	64718622	64826949	+	108328	0.147173	6.58625	1.26496	0.234156	0.980572	-4.54923
ENSMUSG00000002308	Cd320	17	34062065	34068748	+	6684	-0.174955	3.9437	-1.26484	0.234198	0.980572	-4.53888
ENSMUSG00000020346	Mgat1	11	49135018	49153857	+	18840	0.0911962	6.25747	1.26481	0.234209	0.980572	-4.55078
ENSMUSG00000022205	Sub1	15	11981425	11997069	-	15645	-0.177938	7.68485	-1.26465	0.234266	0.980572	-4.54421
ENSMUSG00000061536	Sec22c	9	121509111	121534556	-	25446	0.11149	6.09851	1.2646	0.234281	0.980572	-4.55112
ENSMUSG00000040033	Stat2	10	128106428	128128718	+	22291	0.112753	4.87828	1.2646	0.234283	0.980572	-4.54653
ENSMUSG00000000374	Trappc10	10	78022559	78080475	-	57917	0.164464	7.03928	1.26448	0.234321	0.980572	-4.547
ENSMUSG00000027108	Ola1	2	72923145	73049268	-	126124	-0.148986	6.40018	-1.26442	0.234342	0.980572	-4.55046
ENSMUSG00000023235	Ccl25	8	4375210	4410020	+	34811	0.131183	4.81274	1.26438	0.234357	0.980572	-4.54638
ENSMUSG00000021731	Mrps30	13	118514917	118523788	-	8872	-0.138565	4.78832	-1.26418	0.234425	0.980572	-4.54602
ENSMUSG00000041530	Ago1	4	126328805	126362376	-	33572	0.153615	6.81059	1.26393	0.234512	0.980572	-4.54856
ENSMUSG00000033624	Pdpr	8	111821262	111863706	+	42445	0.365952	5.04603	1.2639	0.234524	0.980572	-4.54841
ENSMUSG00000025351	Cd63	10	128736858	128748691	+	11834	-0.169951	5.06173	-1.26368	0.2346	0.980572	-4.54809
ENSMUSG00000026500	Cox20	1	178146695	178150258	+	3564	-0.150424	4.49024	-1.26343	0.234683	0.980572	-4.54371
ENSMUSG00000074283	Zfp109	7	23926997	23936985	-	9989	0.308477	3.39125	1.26338	0.234703	0.980572	-4.53859
ENSMUSG00000005514	Por	5	135698887	135764180	+	65294	-0.0994263	6.6312	-1.2633	0.234728	0.980572	-4.5501
ENSMUSG00000042055	Wdr11	7	129193587	129237462	+	43876	0.097289	6.0123	1.26326	0.234743	0.980572	-4.55185
ENSMUSG00000026814	Eng	2	32536607	32572681	+	36075	-0.137508	4.79951	-1.2632	0.234765	0.980572	-4.54693
ENSMUSG00000092368	A930015D03Rik	17	36305345	36349327	+	43983	0.620727	5.82861	1.26312	0.234792	0.980572	-4.5515
ENSMUSG00000020849	Ywhae	11	75623695	75656671	+	32977	-0.139655	9.28737	-1.26297	0.234845	0.980572	-4.54126
ENSMUSG00000030522		7	63937401	63990554	+	53154	0.164213	4.83929	1.26269	0.234941	0.980572	-4.54764
ENSMUSG00000070705	Eid2b	7	27977164	27978914	+	1751	0.13026	4.40196	1.26265	0.234953	0.980572	-4.54331
ENSMUSG00000031367	Ap1s2	X	162692013	162716662	+	24650	-0.2186	6.93788	-1.26201	0.235173	0.980572	-4.54869
ENSMUSG00000028937	Acot7	4	152262591	152356312	+	93722	-0.106399	7.66235	-1.26182	0.235239	0.980572	-4.54588
ENSMUSG00000086968	4933431E20Rik	3	107796166	107803529	-	7364	0.137013	6.60885	1.2618	0.235248	0.980572	-4.5509
ENSMUSG00000097994	Gm26982	6	113691932	113693082	+	1151	-0.143517	2.34867	-1.26168	0.23529	0.980572	-4.54377
ENSMUSG00000030798	Cd37	7	44883056	44888539	-	5484	0.198529	1.98848	1.26148	0.235358	0.980572	-4.54743
ENSMUSG00000003352	Cacnb3	15	98528721	98542410	+	13690	-0.127549	7.11355	-1.26098	0.235532	0.980572	-4.54859
ENSMUSG00000030335	Mrpl51	6	125168764	125173232	+	4469	-0.132652	5.00955	-1.26097	0.235534	0.980572	-4.54941
ENSMUSG00000110296	Gm45533	4	138803135	138803519	+	385	0.368616	0.328567	1.26067	0.235637	0.980572	-4.56184
ENSMUSG00000020658	Efr3b	12	4012554	4088915	-	76362	0.151178	7.97752	1.26035	0.23575	0.980572	-4.54554
ENSMUSG00000027804	Ppid	3	79498649	79510957	+	12309	-0.130032	6.48275	-1.26004	0.235856	0.980572	-4.5526
ENSMUSG00000020220	Vps13d	4	144699192	144921575	-	222384	0.252928	7.31776	1.25997	0.235881	0.980572	-4.54808
ENSMUSG00000015143	Actn1	12	80214321	80307145	-	92825	0.149975	7.77381	1.25955	0.236027	0.980572	-4.54666
ENSMUSG00000026842	Abl1	2	31578388	31694239	+	115852	0.142013	6.46932	1.25937	0.236088	0.980572	-4.5531
ENSMUSG00000078451		10	41366435	41390282	+	23848	0.18499	4.35265	1.25924	0.236132	0.980572	-4.54454
ENSMUSG00000019362	D8Ertd738e	8	84972867	84976348	-	3482	-0.198182	5.13952	-1.25865	0.236337	0.980572	-4.55141
ENSMUSG00000021910	Nisch	14	30892887	30938903	-	46017	0.130291	9.30737	1.25835	0.236443	0.980572	-4.54345
ENSMUSG00000044876	Zfp444	7	6175225	6196810	+	21586	-0.0942214	5.43952	-1.25807	0.236539	0.980572	-4.55357
ENSMUSG00000045174	Amer3	1	34618738	34630025	+	11288	0.128836	5.00146	1.25768	0.236676	0.980572	-4.5514
ENSMUSG00000034932	Mrpl54	10	81100547	81102768	-	2222	-0.218987	3.40208	-1.25729	0.23681	0.980572	-4.54103
ENSMUSG00000028433	Ubap2	4	41194313	41275144	-	80832	0.140021	5.9804	1.25674	0.237	0.980572	-4.55555
ENSMUSG00000047084	Ngrn	7	79910963	79915122	+	4160	-0.142333	5.10954	-1.25585	0.23731	0.980572	-4.55302
ENSMUSG00000022475	Hdac7	15	97690545	97742383	-	51839	0.182813	5.15813	1.25565	0.23738	0.980572	-4.55337
ENSMUSG00000083798	Gm14584	X	52507208	52507844	+	637	0.495013	-1.43115	1.25561	0.237392	0.980572	-4.57452
ENSMUSG00000033565	Rbfox2	15	76963190	77191204	-	228015	0.167571	8.6297	1.25561	0.237394	0.980572	-4.5463
ENSMUSG00000030647	Ndufc2	7	97049210	97057009	+	7800	-0.194987	5.86297	-1.25547	0.237443	0.980572	-4.55603
ENSMUSG00000055670	Zzef1	11	72687052	72817946	+	130895	0.20681	6.78104	1.25506	0.237585	0.980572	-4.55367
ENSMUSG00000006307	Kmt2b	7	30268283	30288151	-	19869	0.144504	6.53334	1.25328	0.238207	0.980572	-4.55632
ENSMUSG00000037270	4932438A13Rik	3	36917253	37107182	+	189930	0.24718	7.7745	1.25314	0.238256	0.980572	-4.54982
ENSMUSG00000056342	Usp34	11	23256895	23440560	+	183666	0.190718	7.56415	1.2529	0.238338	0.980572	-4.55071
ENSMUSG00000034269	Setd5	6	113054326	113130396	+	76071	0.188549	7.05812	1.25283	0.238362	0.980572	-4.55319
ENSMUSG00000029804	Herc3	6	58808450	58897383	+	88934	0.167506	6.91498	1.25272	0.238402	0.980572	-4.55409
ENSMUSG00000030615	Tmem126a	7	90099908	90106437	-	6530	-0.213664	4.31416	-1.2524	0.238513	0.980572	-4.54756
ENSMUSG00000040548	Tex2	11	106392973	106504249	-	111277	0.103698	6.86277	1.25227	0.238558	0.980572	-4.55475
ENSMUSG00000086714	0610009E02Rik	2	26335708	26349402	+	13695	0.312653	2.91837	1.25227	0.238559	0.980572	-4.54376
ENSMUSG00000027652	Ralgapb	2	158251768	158341173	+	89406	0.186634	7.60005	1.25224	0.238568	0.980572	-4.5509
ENSMUSG00000038489	Polr2l	7	141051773	141055045	-	3273	-0.156723	3.27736	-1.25218	0.23859	0.980572	-4.54311
ENSMUSG00000023904	Hcfc1r1	17	23892570	23894201	+	1632	-0.185431	5.49104	-1.25218	0.238591	0.980572	-4.55676
ENSMUSG00000028850	Gpatch3	4	133302056	133311554	+	9499	-0.168066	2.64475	-1.25205	0.238635	0.980572	-4.54528
ENSMUSG00000033972	Zfp944	17	22556970	22580381	-	23412	-0.234587	4.53934	-1.25178	0.23873	0.980572	-4.55082
ENSMUSG00000031988	Vps26b	9	26919067	26941361	-	22295	0.100541	7.0363	1.25155	0.238809	0.980572	-4.55418
ENSMUSG00000017677	Wsb1	11	79130198	79145497	-	15300	0.146544	7.07879	1.25154	0.238814	0.980572	-4.55374
ENSMUSG00000007872	Id3	4	135870808	135873066	+	2259	-0.22292	4.61285	-1.25093	0.239026	0.980572	-4.551
ENSMUSG00000000276	Dgke	11	88926005	88957676	-	31672	0.105921	6.5253	1.25078	0.239078	0.980572	-4.55751
ENSMUSG00000030987	Stim1	7	101917013	102086526	+	169514	0.097053	7.18258	1.25073	0.239099	0.980572	-4.55382
ENSMUSG00000042660	Wdr55	18	36893273	36896863	+	3591	-0.171543	3.3541	-1.24985	0.239405	0.980572	-4.54394
ENSMUSG00000043998	Mgat2	12	69230931	69233544	+	2614	-0.111302	4.64824	-1.24984	0.239411	0.980572	-4.55246
ENSMUSG00000018661	Cog1	11	113539995	113557880	+	17886	0.108078	6.05109	1.24976	0.239438	0.980572	-4.55951
[truncated: 8,327 more rows]

## Sheet: S5 - Diff. Exp. {Powell}
Original Gene ID	Gene.Name	Chr	Start	End	Strand	Length	logFC	AveExpr	t	P.Value	adj.P.Val	B
[truncated: 7,104 more rows]

## Sheet: S6 - Shared Genes Summary
Human Gene Symbol	Human Gene ID	Mouse Gene Symbol	Mouse Gene ID	Rat Gene Symbol	Rat Gene ID	Datasets	Direction	Comments
[truncated: 34 more rows]

[truncated: 7 more sheets: S7 - Prioritization of Genes, S8 - Sex by Tissue ANOVAs, S9 - Tissue Tukey's, Contrasts, S10 - Tissue Tukey's, CLD, S11 - Sex Effect Summary, S12 - Interaction Tukey's, S13 - Interaction Summary]
